# Supplementary material for: Comprehensive Transcriptome Profiling of NAFLD- and NASH-Induced Skeletal Muscle Dysfunction
Source: Front Endocrinol (Lausanne). 2022 Feb 21;13:851520. doi: 10.3389/fendo.2022.851520 (PMC8899658; doi:10.3389/fendo.2022.851520)
Supplement: Supplementary file 2 [file Table_2.xlsx]

## Sheet: Supplementary Table S2
Supplementary Table S2. Top GO Terms and KEGG pathways in this study.
Figure 3B
GO.ID	Term	GENES	Ontology	Count	Pop.Hits	List.Total	Pop.Total		Fold.Enrichment	Pvalue	FDR	Enrichment.Score	Gene.Ratio
GO:0051241	Negative regulation of multicellular organismal process	TPH1//TNFAIP3//ARRB1//CIDEA//STC2//C1QTNF3	Biological process	6	361	49	23376		7.929	0.000103925	0.194877	3.98328	0.122449
GO:0001818	Negative regulation of cytokine production	TNFAIP3//ARRB1//CIDEA//C1QTNF3	Biological process	4	126	49	23376		15.1448	0.000141317	0.194877	3.84981	0.0816327
GO:0050709	Negative regulation of protein secretion	CIDEA//C1QTNF3//SERGEF	Biological process	3	49	49	23376		29.2078	0.000149004	0.194877	3.8268	0.0612245
GO:0010817	Regulation of hormone levels	DIO2//ECE2//ARRB1//PLB1//STC2//C1QTNF3	Biological process	6	407	49	23376		7.03284	0.000199412	0.194877	3.70025	0.122449
GO:0042592	Homeostatic process	CIDEA//TNFAIP3//STC2//SLC24A3//TFRC//NR3C2//C1QTNF3//ARRB1//GYK//SESN3	Biological process	10	1265	49	23376		3.77123	0.000246901	0.194877	3.60748	0.204082
GO:0048878	Chemical homeostasis	STC2//SLC24A3//TFRC//NR3C2//C1QTNF3//ARRB1//GYK//SESN3	Biological process	8	819	49	23376		4.65994	0.000276907	0.194877	3.55767	0.163265
GO:0001817	Regulation of cytokine production	TNFAIP3//ARRB1//CIDEA//RNF135//C1QTNF3//CD274	Biological process	6	434	49	23376		6.59532	0.000281584	0.194877	3.55039	0.122449
GO:0042445	Hormone metabolic process	DIO2//ECE2//PLB1//STC2	Biological process	4	153	49	23376		12.4722	0.000297296	0.194877	3.52681	0.0816327
GO:0050708	Regulation of protein secretion	SERGEF//CIDEA//C1QTNF3//CD274	Biological process	4	172	49	23376		11.0944	0.000463221	0.225504	3.33421	0.0816327
GO:0051239	Regulation of multicellular organismal process	CCDC88A//TNMD//TPH1//TNFAIP3//ARRB1//CIDEA//RNF135//STC2//GDF11//TFRC//C1QTNF3//CHAD//CD274	Biological process	13	2225	49	23376		2.78732	0.00050334	0.225504	3.29814	0.265306
Figure 3C
GO.ID	Term	GENES	Ontology	Count	Pop.Hits	List.Total	Pop.Total		Fold.Enrichment	Pvalue	FDR	Enrichment.Score	Gene.Ratio
GO:0055008	Cardiac muscle tissue morphogenesis	HEY1//PITX2//MYH7//MYL3//MYL2//TNNI1	Biological process	6	61	75	23376		30.657	4.29491e-08	0.000225225	7.36705	0.08
GO:0060415	Muscle tissue morphogenesis	HEY1//PITX2//MYH7//MYL3//MYL2//TNNI1	Biological process	6	70	75	23376		26.7154	9.91342e-08	0.00025993	7.00378	0.08
GO:0048644	Muscle organ morphogenesis	HEY1//PITX2//MYH7//MYL3//MYL2//TNNI1	Biological process	6	78	75	23376		23.9754	1.90308e-07	0.000332658	6.72054	0.08
GO:0055010	Ventricular cardiac muscle tissue morphogenesis	HEY1//MYH7//MYL3//MYL2//TNNI1	Biological process	5	45	75	23376		34.6311	3.28204e-07	0.000430275	6.48386	0.0666667
GO:0003229	Ventricular cardiac muscle tissue development	HEY1//MYH7//MYL3//MYL2//TNNI1	Biological process	5	49	75	23376		31.8041	5.07163e-07	0.000531912	6.29485	0.0666667
GO:0007517	Muscle organ development	PITX2//HEY1//SEPN1//ANKRD2//MYH7//MYL3//MYL2//TNNI1//CSRP3	Biological process	9	339	75	23376		8.27469	1.38201e-06	0.00101286	5.85949	0.12
GO:0003231	Cardiac ventricle development	HEY1//MYH7//MYL3//MYL2//TNNI1//PITX2	Biological process	6	109	75	23376		17.1567	1.3872e-06	0.00101286	5.85786	0.08
GO:0003012	Muscle system process	TNNT1//CSRP3//MYH7//ATP2A2//TNNI1//MYL3//MYL2	Biological process	8	262	75	23376		9.51695	1.97411e-06	0.00101286	5.70463	0.106667
GO:0048738	Cardiac muscle tissue development	HEY1//CSRP3//MYL2//PITX2//MYH7//MYL3//TNNI1	Biological process	7	184	75	23376		11.8574	2.1105e-06	0.00101286	5.67562	0.0933333
GO:0002026	Regulation of the force of heart contraction	ATP2A2//CSRP3//MYH7//MYL3	Biological process	4	29	75	23376		42.9903	2.18406e-06	0.00101286	5.66074	0.0533333
Figure 3D
PathwayID	Definition	Genes	OriginalWebSite	Fisher-Pvalue	-log10P	SelectionCounts	SelectionSize		Count	Size	FDR	Enrichment_Score	GeneRatio
mmu03320	PPAR signaling pathway	GYK//SCD1//SCD2//UCP1	http://www.genome.jp/kegg-bin/show_pathway?mmu03320+14933+20249+20250+22227	4.81246e-05	4.31763	4	20		82	7810	0.0142449	4.31763	0.2
mmu01212	Fatty acid metabolism	FASN//SCD1//SCD2	http://www.genome.jp/kegg-bin/show_pathway?mmu01212+14104+20249+20250	0.000276559	3.55821	3	20		51	7810	0.0409308	3.55821	0.15
mmu01040	Biosynthesis of unsaturated fatty acids	SCD1//SCD2	http://www.genome.jp/kegg-bin/show_pathway?mmu01040+20249+20250	0.00210458	2.67684	2	20		27	7810	0.207651	2.67684	0.1
mmu04152	AMPK signaling pathway	FASN//SCD1//SCD2	http://www.genome.jp/kegg-bin/show_pathway?mmu04152+14104+20249+20250	0.00408635	2.38866	3	20		129	7810	0.30239	2.38866	0.15
mmu04510	Focal adhesion	CHAD//COMP//PPP1CC	http://www.genome.jp/kegg-bin/show_pathway?mmu04510+12643+12845+19047	0.014235	1.84664	3	20		203	7810	0.842712	1.84664	0.15
mmu04512	ECM-receptor interaction	CHAD//COMP	http://www.genome.jp/kegg-bin/show_pathway?mmu04512+12643+12845	0.0187288	1.72749	2	20		83	7810	0.923953	1.72749	0.1
mmu04910	Insulin signaling pathway	FASN//PPP1CC	http://www.genome.jp/kegg-bin/show_pathway?mmu04910+14104+19047	0.049735	1.30334	2	20		141	7810	1	1.30334	0.1
Figure 3E
PathwayID	Definition	Genes	OriginalWebSite	Fisher-Pvalue	-log10P	SelectionCounts	SelectionSize		Count	Size	FDR	Enrichment_Score	GeneRatio
mmu04260	Cardiac muscle contraction	ATP2A2//MYH7//MYL2//MYL3//TPM3	http://www.genome.jp/kegg-bin/show_pathway?mmu04260+11938+140781+17906+17897+59069	1.37087e-05	4.863	5	31		80	7810	0.00227757	4.863	0.16129
mmu05410	Hypertrophic cardiomyopathy (HCM)	ATP2A2//MYH7//MYL2//MYL3//TPM3	http://www.genome.jp/kegg-bin/show_pathway?mmu05410+11938+140781+17906+17897+59069	1.74096e-05	4.75921	5	31		84	7810	0.00227757	4.75921	0.16129
mmu05414	Dilated cardiomyopathy	ATP2A2//MYH7//MYL2//MYL3//TPM3	http://www.genome.jp/kegg-bin/show_pathway?mmu05414+11938+140781+17906+17897+59069	2.30835e-05	4.6367	5	31		89	7810	0.00227757	4.6367	0.16129
mmu04261	Adrenergic signaling in cardiomyocytes	ATP2A2//MYH7//MYL2//MYL3//TPM3	http://www.genome.jp/kegg-bin/show_pathway?mmu04261+11938+140781+17906+17897+59069	0.000295164	3.52994	5	31		152	7810	0.0218421	3.52994	0.16129
mmu04213	Longevity regulating pathway - multiple species	HSPA1A//HSPA1B//IRS2	http://www.genome.jp/kegg-bin/show_pathway?mmu04213+193740+15511+384783	0.00200296	2.69833	3	31		64	7810	0.0903618	2.69833	0.096774
mmu00980	Metabolism of xenobiotics by cytochrome P450	CYP1B1//CYP2E1//CYP2F2	http://www.genome.jp/kegg-bin/show_pathway?mmu00980+13078+13106+13107	0.00209426	2.67897	3	31		65	7810	0.0903618	2.67897	0.096774
mmu04530	Tight junction	LLGL2//MYH7//MYL10//MYL2	http://www.genome.jp/kegg-bin/show_pathway?mmu04530+217325+140781+59310+17906	0.00213693	2.67021	4	31		140	7810	0.0903618	2.67021	0.129032
mmu05134	Legionellosis	HSPA1A//HSPA1B	http://www.genome.jp/kegg-bin/show_pathway?mmu05134+193740+15511	0.0219573	1.65842	2	31		58	7810	0.81242	1.65842	0.064516
mmu04022	cGMP-PKG signaling pathway	ATP2A2//IRS2//MYH7	http://www.genome.jp/kegg-bin/show_pathway?mmu04022+11938+384783+140781	0.0300387	1.52232	3	31		172	7810	0.98794	1.52232	0.096774
mmu00140	Steroid hormone biosynthesis	CYP1B1//CYP2E1	http://www.genome.jp/kegg-bin/show_pathway?mmu00140+13078+13106	0.0462978	1.33444	2	31		87	7810	1	1.33444	0.064516
mmu04610	Complement and coagulation cascades	C2//SERPINA1A	http://www.genome.jp/kegg-bin/show_pathway?mmu04610+12263+20700	0.0462978	1.33444	2	31		87	7810	1	1.33444	0.064516
Figure 4B
GO.ID	Term	GENES	Ontology	Count	Pop.Hits	List.Total	Pop.Total		Fold.Enrichment	Pvalue	-logP	FDR	Enrichment.Score	Gene.Ratio
GO:0019216	Regulation of lipid metabolic process	LEP//THRSP//SREBF1//SCD1//PLA2G4A//PTK2B//ADIPOQ//CIDEA	Biological process	8	240	52	23376		14.9846	5.60098e-08	7.25174	0.000290494	7.25174	0.153846
GO:0044711	Single-organism biosynthetic process	PPP1R3D//LEP//FASN//SCD1//ADRB3//NPR3//SREBF1//THRSP//PNPLA3//MC5R//PTK2B//PLA2G4A//ADIPOQ//TKT	Biological process	14	1130	52	23376		5.5695	1.10791e-07	6.9555	0.000290494	6.9555	0.269231
GO:0032787	Monocarboxylic acid metabolic process	ENO2//DHTKD1//FASN//PRKAR2B//SCD1//ADIPOQ//LEP//SREBF1//PLA2G4A	Biological process	9	464	52	23376		8.7195	7.64019e-07	6.1169	0.00133551	6.1169	0.173077
GO:0044712	Single-organism catabolic process	PYGL//PPP1R3D//ENO2//DHTKD1//TKT//IIGP1//ADIPOQ//LEP//PLA2G4A//PNPLA3//CDO1//PTK2B//CIDEA//HP	Biological process	14	1393	52	23376		4.51797	1.38864e-06	5.85741	0.00182051	5.85741	0.269231
GO:0044724	Single-organism carbohydrate catabolic process	PYGL//PPP1R3D//ENO2//DHTKD1//TKT	Biological process	5	105	52	23376		21.4066	3.6502e-06	5.43768	0.00314407	5.43768	0.0961538
GO:0045834	Positive regulation of lipid metabolic process	SREBF1//SCD1//PLA2G4A//PTK2B//ADIPOQ	Biological process	5	110	52	23376		20.4336	4.58807e-06	5.33837	0.00314407	5.33837	0.0961538
GO:0006631	Fatty acid metabolic process	FASN//SCD1//ADIPOQ//LEP//SREBF1//PLA2G4A//PRKAR2B	Biological process	7	303	52	23376		10.3854	4.6567e-06	5.33192	0.00314407	5.33192	0.134615
GO:0016052	Carbohydrate catabolic process	PYGL//PPP1R3D//ENO2//DHTKD1//TKT	Biological process	5	111	52	23376		20.2495	4.79645e-06	5.31908	0.00314407	5.31908	0.0961538
Figure 4C
GO.ID	Term	GENES	Ontology	Count	Pop.Hits	List.Total	Pop.Total		Fold.Enrichment	Pvalue	-logP	FDR	Enrichment.Score	Gene.Ratio
GO:0060537	Muscle tissue development	VGLL2//EYA2//EGR1//FOS//ANKRD2//NMRK2//CHRND//CSRP3//RCAN1//MYL2//MYH7//FOXS1//MYL3//TNNC1//TNNI1//XIRP1//PPARGC1A	Biological process	17	379	81	23376		12.9448	1.29165e-14	13.8889	6.77342e-11	13.8889	0.209877
GO:0014706	Striated muscle tissue development	VGLL2//EGR1//FOS//ANKRD2//NMRK2//CHRND//CSRP3//RCAN1//MYL2//MYH7//FOXS1//MYL3//TNNC1//TNNI1//XIRP1//EYA2	Biological process	16	360	81	23376		12.8263	9.73335e-14	13.0117	2.55208e-10	13.0117	0.197531
GO:0003012	Muscle system process	TNNC1//CHRND//TNNT1//CSRP3//ACTN2//MYH7//MYH2//ATP2A2//TNNI1//MYL3//LMCD1//ATP1B1//MYL2	Biological process	13	262	81	23376		14.3195	6.23494e-12	11.2052	1.08508e-08	11.2052	0.160494
GO:0006936	Muscle contraction	TNNC1//CHRND//TNNT1//ATP2A2//TNNI1//MYH7//MYL3//ATP1B1//CSRP3//MYL2//ACTN2//MYH2	Biological process	12	210	81	23376		16.491	8.27673e-12	11.0821	1.08508e-08	11.0821	0.148148
GO:0007517	Muscle organ development	VGLL2//EGR1//FOS//ANKRD2//NMRK2//CHRND//RCAN1//MYH7//FOXS1//MYL3//MYL2//TNNC1//TNNI1//CSRP3	Biological process	14	339	81	23376		11.9183	1.05775e-11	10.9756	1.10936e-08	10.9756	0.17284
GO:0061061	Muscle structure development	CSRP3//VGLL2//BARX2//EGR1//FOS//ANKRD2//MYL2//XIRP1//NMRK2//CHRND//RCAN1//MYH7//FOXS1//MYL3//TNNC1//TNNI1	Biological process	16	516	81	23376		8.94861	2.26306e-11	10.6453	1.97792e-08	10.6453	0.197531
GO:0006941	Striated muscle contraction	TNNC1//CHRND//TNNT1//MYL3//ATP1B1//CSRP3//MYL2//MYH7	Biological process	8	108	81	23376		21.3772	3.88191e-09	8.41096	2.9081e-06	8.41096	0.0987654
GO:0055010	Ventricular cardiac muscle tissue morphogenesis	MYH7//FOXS1//MYL3//MYL2//TNNC1//TNNI1	Biological process	6	45	81	23376		38.479	1.04837e-08	7.97948	6.87208e-06	7.97948	0.0740741
GO:0003229	Ventricular cardiac muscle tissue development	MYH7//FOXS1//MYL3//MYL2//TNNC1//TNNI1	Biological process	6	49	81	23376		35.3379	1.78019e-08	7.74953	1.03726e-05	7.74953	0.0740741
GO:0009888	Tissue development	BARX2//FOXS1//NR4A3//MEOX1//ENAH//COMP//VGLL2//EYA2//EGR1//FOS//ANKRD2//NMRK2//CHRND//CSRP3//RCAN1//MYL2//MYH7//MYL3//TNNC1//TNNI1//XIRP1//PPARGC1A	Biological process	22	1638	81	23376		3.87609	2.32404e-08	7.63376	1.21873e-05	7.63376	0.271605
Figure 4D
PathwayID	Definition	Genes	OriginalWebSite	Fisher-Pvalue	-logP	SelectionCounts	SelectionSize		Count	Size	FDR	Enrichment_Score	GeneRatio
mmu04152	AMPK signaling pathway	ADIPOQ//FASN//LEP//SCD1//SREBF1	http://www.genome.jp/kegg-bin/show_pathway?mmu04152+11450+14104+16846+20249+20787	4.63524e-05	4.33393	5	25		129	7810	0.0105004	4.33393	0.2
mmu04910	Insulin signaling pathway	FASN//PPP1R3D//PRKAR2B//PYGL//SREBF1	http://www.genome.jp/kegg-bin/show_pathway?mmu04910+14104+228966+19088+110095+20787	7.09484e-05	4.14906	5	25		141	7810	0.0105004	4.14906	0.2
mmu03320	PPAR signaling pathway	ADIPOQ//SCD1//UCP1	http://www.genome.jp/kegg-bin/show_pathway?mmu03320+11450+20249+22227	0.002172	2.66314	3	25		82	7810	0.214304	2.66314	0.12
mmu04931	Insulin resistance	PPP1R3D//PYGL//SREBF1	http://www.genome.jp/kegg-bin/show_pathway?mmu04931+228966+110095+20787	0.00511772	2.29092	3	25		111	7810	0.378711	2.29092	0.12
mmu01212	Fatty acid metabolism	FASN//SCD1	http://www.genome.jp/kegg-bin/show_pathway?mmu01212+14104+20249	0.0113956	1.94326	2	25		51	7810	0.521651	1.94326	0.08
mmu04080	Neuroactive ligand-receptor interaction	ADRB3//LEP//MC5R//PTGER3	http://www.genome.jp/kegg-bin/show_pathway?mmu04080+11556+16846+17203+19218	0.0119872	1.92128	4	25		285	7810	0.521651	1.92128	0.16
mmu04932	Non-alcoholic fatty liver disease (NAFLD)	ADIPOQ//LEP//SREBF1	http://www.genome.jp/kegg-bin/show_pathway?mmu04932+11450+16846+20787	0.013252	1.87772	3	25		157	7810	0.521651	1.87772	0.12
mmu04923	Regulation of lipolysis in adipocytes	ADRB3//PTGER3	http://www.genome.jp/kegg-bin/show_pathway?mmu04923+11556+19218	0.0140987	1.85082	2	25		57	7810	0.521651	1.85082	0.08
mmu04020	Calcium signaling pathway	ADRB3//PTGER3//PTK2B	http://www.genome.jp/kegg-bin/show_pathway?mmu04020+11556+19218+19229	0.0193578	1.71314	3	25		181	7810	0.636656	1.71314	0.12
mmu04920	Adipocytokine signaling pathway	ADIPOQ//LEP	http://www.genome.jp/kegg-bin/show_pathway?mmu04920+11450+16846	0.0219293	1.65898	2	25		72	7810	0.649107	1.65897	0.08
Figure 4E
PathwayID	Definition	Genes	OriginalWebSite	Fisher-Pvalue	-logP	SelectionCounts	SelectionSize		Count	Size	FDR	Enrichment_Score	GeneRatio
mmu04260	Cardiac muscle contraction	ATP1B1//ATP2A2//CACNA2D4//MYH7//MYL2//MYL3//TNNC1//TPM3	http://www.genome.jp/kegg-bin/show_pathway?mmu04260+11931+11938+319734+140781+17906+17897+21924+59069	2.2999e-08	7.63829	8	48		80	7810	6.8077e-06	7.63829	0.166667
mmu05410	Hypertrophic cardiomyopathy (HCM)	ATP2A2//CACNA2D4//MYH7//MYL2//MYL3//TNNC1//TPM3	http://www.genome.jp/kegg-bin/show_pathway?mmu05410+11938+319734+140781+17906+17897+21924+59069	6.66501e-07	6.1762	7	48		84	7810	9.77538e-05	6.1762	0.145833
mmu05414	Dilated cardiomyopathy	ATP2A2//CACNA2D4//MYH7//MYL2//MYL3//TNNC1//TPM3	http://www.genome.jp/kegg-bin/show_pathway?mmu05414+11938+319734+140781+17906+17897+21924+59069	9.90748e-07	6.00404	7	48		89	7810	9.77538e-05	6.00404	0.145833
mmu04261	Adrenergic signaling in cardiomyocytes	ATP1B1//ATP2A2//CACNA2D4//MYH7//MYL2//MYL3//TNNC1//TPM3	http://www.genome.jp/kegg-bin/show_pathway?mmu04261+11931+11938+319734+140781+17906+17897+21924+59069	3.33965e-06	5.4763	8	48		152	7810	0.000247134	5.4763	0.166667
mmu04530	Tight junction	ACTN2//MYH2//MYH7//MYH7B//MYL10//MYL2	http://www.genome.jp/kegg-bin/show_pathway?mmu04530+11472+17882+140781+668940+59310+17906	0.000196871	3.70582	6	48		140	7810	0.0116548	3.70582	0.125
mmu05134	Legionellosis	HSPA1A//HSPA1B//TLR4	http://www.genome.jp/kegg-bin/show_pathway?mmu05134+193740+15511+21898	0.0053053	2.27529	3	48		58	7810	0.261728	2.27529	0.0625
mmu04213	Longevity regulating pathway - multiple species	HSPA1A//HSPA1B//IRS2	http://www.genome.jp/kegg-bin/show_pathway?mmu04213+193740+15511+384783	0.00698186	2.15603	3	48		64	7810	0.288834	2.15603	0.0625
mmu04510	Focal adhesion	ACTN2//CHAD//COMP//MYL10//MYL2	http://www.genome.jp/kegg-bin/show_pathway?mmu04510+11472+12643+12845+59310+17906	0.00780633	2.10755	5	48		203	7810	0.288834	2.10755	0.104167
mmu04976	Bile secretion	ATP1B1//NCEH1//SLCO1B2	http://www.genome.jp/kegg-bin/show_pathway?mmu04976+11931+320024+28253	0.00929528	2.03174	3	48		71	7810	0.305711	2.03174	0.0625
mmu05412	Arrhythmogenic right ventricular cardiomyopathy (ARVC)	ACTN2//ATP2A2//CACNA2D4	http://www.genome.jp/kegg-bin/show_pathway?mmu05412+11472+11938+319734	0.0104083	1.98262	3	48		74	7810	0.308084	1.98262	0.0625
Figure 5B
Category	Term	Genes	%	PValue	LogP	List Total	Pop Hits	Count	Pop Total	Fold Enrichment	FDR	Bonferroni	Benjamini
GOTERM_BP_DIRECT	GO:0006631~Fatty acid metabolic process	PRKAR2B, FASN, SCD2, SCD1, SLC27A2	27.7778	1.1624e-05	4.93465	18	156	5	18082	32.1973	0.0018947	0.00192773	0.00192958
GOTERM_BP_DIRECT	GO:0006629~Lipid metabolic process	FASN, SCD2, CIDEA, SCD1, SLC27A2	27.7778	0.000749946	3.12497	18	459	5	18082	10.9429	0.0611206	0.117095	0.0622455
GOTERM_BP_DIRECT	GO:0006633~Fatty acid biosynthetic process	FASN, SCD2, SCD1	16.6667	0.00215945	2.66566	18	74	3	18082	40.7252	0.11733	0.301525	0.119489
GOTERM_BP_DIRECT	GO:1903966~Monounsaturated fatty acid biosynthetic process	SCD2, SCD1	11.1111	0.00375566	2.42531	18	4	2	18082	502.278	0.153043	0.464531	0.15586
GOTERM_BP_DIRECT	GO:0042759~Long-chain fatty acid biosynthetic process	SCD2, SCD1	11.1111	0.00843156	2.07409	18	9	2	18082	223.235	0.274869	0.754774	0.279928
GOTERM_BP_DIRECT	GO:0006636~Unsaturated fatty acid biosynthetic process	SCD2, SCD1	11.1111	0.0140154	1.8534	18	15	2	18082	133.941	0.380751	0.903962	0.387759
GOTERM_BP_DIRECT	GO:0070542~Response to fatty acid	SCD2, SCD1	11.1111	0.0177215	1.7515	18	19	2	18082	105.743	0.412657	0.948601	0.420252
Figure 5C
Category	Term	Genes	%	PValue	LogP	List Total	Pop Hits	Count	Pop Total	Fold Enrichment	FDR	Bonferroni	Benjamini
GOTERM_BP_DIRECT	GO:0002026~Regulation of the force of heart contraction	CSRP3, MYL2, MYL3, ATP2A2, MYH7	8.92857	4.05693e-07	6.3918	50	23	5	18082	78.6174	0.000171608	0.000172404	0.000172419
GOTERM_BP_DIRECT	GO:0014883~Transition between fast and slow fiber	TNNT1, TNNI1, ATP2A2, MYH7	7.14286	2.21434e-06	5.65476	50	10	4	18082	144.656	0.000468332	0.000940651	0.000470547
GOTERM_BP_DIRECT	GO:0060048~Cardiac muscle contraction	CSRP3, MYL2, MYL3, TNNI1, MYH7	8.92857	8.48183e-06	5.07151	50	48	5	18082	37.6708	0.00119594	0.0035983	0.00120159
GOTERM_BP_DIRECT	GO:0055010~Ventricular cardiac muscle tissue morphogenesis	MYL2, MYL3, TNNI1, MYH7	7.14286	5.84109e-05	4.23351	50	28	4	18082	51.6629	0.00617695	0.0245197	0.00620616
GOTERM_BP_DIRECT	GO:0007519~Skeletal muscle tissue development	RCAN1, MYL3, VGLL2, PITX2	7.14286	0.000519621	3.28431	50	58	4	18082	24.9407	0.0439599	0.1982	0.0441678
GOTERM_BP_DIRECT	GO:0006937~Regulation of muscle contraction	TNNT1, TNNI1, ATP2A2	5.35714	0.00175508	2.7557	50	23	3	18082	47.1704	0.123733	0.526008	0.124318
GOTERM_BP_DIRECT	GO:0003009~Skeletal muscle contraction	TNNT1, TNNI1, MYH7	5.35714	0.0022429	2.64919	50	26	3	18082	41.7277	0.135535	0.614919	0.136176
Figure 5D
Category	Term	Genes	%	PValue	LogP	List Total	Pop Hits	Count	Pop Total	Fold Enrichment	FDR	Bonferroni	Benjamini
KEGG_PATHWAY	mmu03320:PPAR signaling pathway	UCP1, SCD2, SCD1, SLC27A2	22.2222	8.7033e-05	4.06032	10	80	4	7691	38.455	0.00182769	0.0018261	0.00182769
KEGG_PATHWAY	mmu01212:Fatty acid metabolism	FASN, SCD2, SCD1	16.6667	0.00150663	2.82199	10	51	3	7691	45.2412	0.0158196	0.0311671	0.0158196
KEGG_PATHWAY	mmu04152:AMPK signaling pathway	FASN, SCD2, SCD1	16.6667	0.00916521	2.03786	10	128	3	7691	18.0258	0.0641565	0.175812	0.0641565
KEGG_PATHWAY	mmu01040:Biosynthesis of unsaturated fatty acids	SCD2, SCD1	11.1111	0.0311713	1.50625	10	27	2	7691	56.9704	0.163649	0.485735	0.163649
Figure 5E
Category	Term	Genes	%	PValue	LogP	List Total	Pop Hits	Count	Pop Total	Fold Enrichment	FDR	Bonferroni	Benjamini
KEGG_PATHWAY	mmu04260:Cardiac muscle contraction	TPM3, MYL2, MYL3, MYH7	7.14286	0.00292377	2.53406	30	77	4	7691	13.3177	0.219283	0.197164	0.219283
KEGG_PATHWAY	mmu04261:Adrenergic signaling in cardiomyocytes	TPM3, MYL2, MYL3, MYH7	7.14286	0.0158522	1.79991	30	142	4	7691	7.2216	0.580525	0.698335	0.580525
KEGG_PATHWAY	mmu04610:Complement and coagulation cascades	SERPINA1A, C7, KNG1	5.35714	0.0329401	1.48228	30	76	3	7691	10.1197	0.580525	0.918903	0.580525
KEGG_PATHWAY	mmu05410:Hypertrophic cardiomyopathy (HCM)	TPM3, MYL2, MYL3	5.35714	0.0353643	1.45144	30	79	3	7691	9.73544	0.580525	0.932818	0.580525
KEGG_PATHWAY	mmu05414:Dilated cardiomyopathy	TPM3, MYL2, MYL3	5.35714	0.0387017	1.41227	30	83	3	7691	9.26627	0.580525	0.948196	0.580525
Figure 6B
Category	Term	Genes	%	PValue	LogP	List Total	Pop Hits	Count	Pop Total	Fold Enrichment	FDR	Bonferroni	Benjamini
GOTERM_BP_DIRECT	GO:0032088~NF-kappaB transcription factor activity	TCEAL7, RWDD3, TRAF3, TNFAIP3, ARRB1	3.5461	0.000853022	3.06904	117	66	5	18082	11.7081	0.646591	0.476316	0.646591
GOTERM_BP_DIRECT	GO:0007420~Brain development	PFKFB3, BMPR2, CADM1, CASP2, AK4, ECE2, SMARCA1	4.96454	0.00270453	2.56791	117	216	7	18082	5.00847	0.928485	0.871626	0.928485
GOTERM_BP_DIRECT	GO:0006915~Apoptotic process	COMP, TPX2, SGPL1, DYRK2, CADM1, TRAF3, TNFSF10, ITPR1, TNFAIP3, CASP2, MFSD10	7.80142	0.00367474	2.43477	117	570	11	18082	2.98249	0.928485	0.938615	0.928485
GOTERM_BP_DIRECT	GO:0016567~Protein ubiquitination	RNF135, TRAF3, RNF38, TULP4, TNFAIP3, ARRB1, KLHL4, MIB1	5.67376	0.00881497	2.05478	117	362	8	18082	3.4154	1	0.998783	1
GOTERM_BP_DIRECT	GO:0032715~Negative regulation of interleukin-6 production	TRIM30A, TNFAIP3, ARRB1	2.12766	0.0157867	1.80171	117	30	3	18082	15.4547	1	0.999994	1
Figure 6C
Category	Term	Genes	%	PValue	LogP	List Total	Pop Hits	Count	Pop Total	Fold Enrichment	FDR	Bonferroni	Benjamini
GOTERM_BP_DIRECT	GO:0009636~Response to toxic substance	CDKN1A, PON1, CYP1B1, MBP, INMT	3.59712	0.00257664	2.58895	121	86	5	18082	8.68826	1	0.922243	1
GOTERM_BP_DIRECT	GO:0045926~Negative regulation of growth	GPC3, MT2, MT1	2.15827	0.00276	2.55909	121	12	3	18082	37.3595	1	0.935182	1
GOTERM_BP_DIRECT	GO:0001525~Angiogenesis	BMP4, ECM1, NOV, HEY1, CYP1B1, HMOX1, TGFBI	5.03597	0.00523351	2.28121	121	239	7	18082	4.37685	1	0.994455	1
GOTERM_BP_DIRECT	GO:0009948~Anterior/posterior axis specification	BMP4, HEY1, GPC3	2.15827	0.00925081	2.03382	121	22	3	18082	20.3779	1	0.999899	1
GOTERM_BP_DIRECT	GO:0048661~Positive regulation of smooth muscle cell proliferation	BMP4, EDN1, HMOX1, IL6RA	2.8777	0.0161698	1.7913	121	80	4	18082	7.4719	1	1	1
Figure 6D
Category	Term	Genes	%	PValue	LogP	List Total	Pop Hits	Count	Pop Total	Fold Enrichment	FDR	Bonferroni	Benjamini
KEGG_PATHWAY	mmu04510:Focal adhesion	COL1A1, COMP, PPP1CC, ITGA4, CHAD, ARHGAP5	4.25532	0.0098135	2.00818	50	207	6	7691	4.45855	1	0.722534	1
KEGG_PATHWAY	mmu04512:ECM-receptor interaction	COL1A1, COMP, ITGA4, CHAD	2.83688	0.0182614	1.73846	50	88	4	7691	6.99182	1	0.908912	1
KEGG_PATHWAY	mmu04151:PI3K-Akt signaling pathway	COL1A1, COMP, ITGA4, CHAD, CDK2, RPS6KB2	4.25532	0.071235	1.14731	50	351	6	7691	2.6294	1	0.999933	1
KEGG_PATHWAY	mmu04514:Cell adhesion molecules (CAMs)	CDH4, ITGA4, CADM1, ICAM2	2.83688	0.083734	1.0771	50	162	4	7691	3.79802	1	0.999988	1
Figure 6E
Category	Term	Genes	%	PValue	LogP	List Total	Pop Hits	Count	Pop Total	Fold Enrichment	FDR	Bonferroni	Benjamini
KEGG_PATHWAY	mmu04066:HIF-1 signaling pathway	EDN1, CDKN1A, EIF4EBP1, HMOX1, IL6RA	3.59712	0.00286308	2.54317	46	102	5	7691	8.19587	0.360748	0.303206	0.360748
KEGG_PATHWAY	mmu04978:Mineral absorption	HMOX1, MT2, MT1	2.15827	0.0216252	1.66504	46	39	3	7691	12.8612	1	0.93637	1
KEGG_PATHWAY	mmu04151:PI3K-Akt signaling pathway	CDKN1A, HSP90AA1, EIF4EBP1, IL4RA, IL6RA, LAMB1	4.31655	0.0527706	1.27761	46	351	6	7691	2.85805	1	0.99892	1
KEGG_PATHWAY	mmu00790:Folate biosynthesis	ALPL, MOCS1	1.43885	0.0735045	1.13369	46	13	2	7691	25.7224	1	0.999934	1
Figure 7B
Category	Term	Genes	%	PValue	LogP	List Total	Pop Hits	Count	Pop Total	Fold Enrichment	FDR	Bonferroni	Benjamini
GOTERM_BP_DIRECT	GO:0006629~Lipid metabolic process	FADS3, SREBF1, EHHADH, INSIG1, LEP, PNPLA3, PLA2G4A, THRSP, PLIN1, PCK1, ACACA, AACS	10.1695	4.64333e-05	4.33317	101	459	12	18082	4.68052	0.0388647	0.038254	0.039004
GOTERM_BP_DIRECT	GO:0008152~Metabolic process	PFKL, EHHADH, PNPLA3, ALG13, PLA2G4A, PYGL, ALDH1A7, ACACA, FBP2, AACS, DHTKD1	9.32203	0.000243189	3.61406	101	463	11	18082	4.25341	0.101775	0.184785	0.102139
GOTERM_BP_DIRECT	GO:0071300~Cellular response to retinoic acid	ABCA1, CYP26B1, LEP, PTK2B, PCK1	4.23729	0.000460343	3.33692	101	65	5	18082	13.7715	0.128436	0.320757	0.128896
GOTERM_BP_DIRECT	GO:0008203~Cholesterol metabolic process	ABCA1, SREBF1, INSIG1, LEP, ABCG1	4.23729	0.00150045	2.82378	101	89	5	18082	10.0578	0.251447	0.71672	0.252348
GOTERM_BP_DIRECT	GO:0035458~Cellular response to interferon-beta	TGTP2, IRGM2, GM4841, GBP2	3.38983	0.00150207	2.82331	101	41	4	18082	17.4663	0.251447	0.717107	0.252348
GOTERM_BP_DIRECT	GO:0043691~Reverse cholesterol transport	ABCA1, SCARB1, ABCG1	2.54237	0.00226988	2.644	101	13	3	18082	41.3145	0.316648	0.851751	0.317783
Figure 7C
Category	Term	Genes	%	PValue	LogP	List Total	Pop Hits	Count	Pop Total	Fold Enrichment	FDR	Bonferroni	Benjamini
GOTERM_BP_DIRECT	GO:0043433~Negative regulation of sequence-specific DNA binding transcription factor activity	FOXS1, WFS1, ID1, ID3, KLF4, TRIB1	3.87097	0.000182843	3.73792	139	69	6	18082	11.3119	0.207527	0.187424	0.207527
GOTERM_BP_DIRECT	GO:0032496~Response to lipopolysaccharide	JUND, GCH1, SLCO1B2, CYP1A1, FOS, TRIB1, TLR4, JUNB	5.16129	0.00079779	3.09811	139	197	8	18082	5.28269	0.452746	0.595803	0.452746
GOTERM_BP_DIRECT	GO:0042157~Lipoprotein metabolic process	APOA2, APOC3, PPARA, APOLD1	2.58065	0.00183465	2.73645	139	32	4	18082	16.2608	0.542845	0.875599	0.542845
GOTERM_BP_DIRECT	GO:0043434~Response to peptide hormone	BTG2, JUND, SLCO1B2, APOC3, SERPINA1E	3.22581	0.00235228	2.62851	139	73	5	18082	8.91002	0.542845	0.930954	0.542845
GOTERM_BP_DIRECT	GO:0010941~Regulation of cell death	JUND, CRYAB, JUNB	1.93548	0.00249984	2.60209	139	10	3	18082	39.0259	0.542845	0.941625	0.542845
GOTERM_BP_DIRECT	GO:0034097~Response to cytokine	JUND, SLCO1B2, FOS, SERPINA1E, JUNB	3.22581	0.00343111	2.46457	139	81	5	18082	8.03002	0.542845	0.979778	0.542845
Figure 7D
Category	Term	Genes	%	PValue	LogP	List Total	Pop Hits	Count	Pop Total	Fold Enrichment	FDR	Bonferroni	Benjamini
KEGG_PATHWAY	mmu04152:AMPK signaling pathway	SREBF1, PFKL, LEP, ADIPOQ, PCK1, ACACA, FBP2	5.9322	0.000130775	3.88348	49	128	7	7691	8.58371	0.0180469	0.0178862	0.0180469
KEGG_PATHWAY	mmu03320:PPAR signaling pathway	EHHADH, ADIPOQ, PLIN1, ANGPTL4, PCK1	4.23729	0.00149222	2.82617	49	80	5	7691	9.80995	0.0781368	0.186232	0.0781368
KEGG_PATHWAY	mmu04910:Insulin signaling pathway	SREBF1, PPP1R3D, PYGL, PCK1, ACACA, FBP2	5.08475	0.00169863	2.7699	49	140	6	7691	6.72682	0.0781368	0.20912	0.0781368
KEGG_PATHWAY	mmu04923:Regulation of lipolysis in adipocytes	ADRB3, PTGER3, PLIN1, GNAI1	3.38983	0.00527173	2.27805	49	57	4	7691	11.0147	0.181875	0.517813	0.181875
KEGG_PATHWAY	mmu00010:Glycolysis / Gluconeogenesis	PFKL, PCK1, ENO2, FBP2	3.38983	0.00792813	2.10083	49	66	4	7691	9.51268	0.218816	0.66661	0.218816
KEGG_PATHWAY	mmu04931:Insulin resistance	SREBF1, PPP1R3D, PYGL, PCK1	3.38983	0.0309163	1.50981	49	110	4	7691	5.70761	0.670659	0.986882	0.670659
Figure 7E
Category	Term	Genes	%	PValue	LogP	List Total	Pop Hits	Count	Pop Total	Fold Enrichment	FDR	Bonferroni	Benjamini
KEGG_PATHWAY	mmu04530:Tight junction	MYH7B, MYH1, MYH2, MYH3, ACTN2, CLDN1, MYH10	4.51613	0.000197009	3.70551	74	90	7	7691	8.08363	0.0323095	0.0321777	0.0327036
KEGG_PATHWAY	mmu04010:MAPK signaling pathway	PRKCG, MAPK11, JUND, HSPB1, CACNA2D4, FOS, FLNC, MAP3K14, CACNA1H	5.80645	0.00247258	2.60685	74	251	9	7691	3.72666	0.182948	0.336984	0.185179
KEGG_PATHWAY	mmu04510:Focal adhesion	PRKCG, COMP, VTN, ACTN2, CHAD, KDR, LAMC2, FLNC	5.16129	0.0033466	2.4754	74	207	8	7691	4.01671	0.182948	0.42677	0.185179
KEGG_PATHWAY	mmu05132:Salmonella infection	MAPK11, FOS, FLNC, PKN1, TLR4	3.22581	0.00627801	2.20218	74	78	5	7691	6.66234	0.187585	0.648461	0.189873
KEGG_PATHWAY	mmu04380:Osteoclast differentiation	MAPK11, JUND, FHL2, FOS, MAP3K14, JUNB	3.87097	0.00673282	2.1718	74	126	6	7691	4.94916	0.187585	0.674185	0.189873
KEGG_PATHWAY	mmu03320:PPAR signaling pathway	APOA2, APOC3, LPL, SORBS1, PPARA	3.22581	0.00686287	2.16349	74	80	5	7691	6.49578	0.187585	0.681191	0.189873
