# Supplementary material for: Comprehensive Transcriptome Profiling of NAFLD- and NASH-Induced Skeletal Muscle Dysfunction
Source: Front Endocrinol (Lausanne). 2022 Feb 21;13:851520. doi: 10.3389/fendo.2022.851520 (PMC8899658; doi:10.3389/fendo.2022.851520)
Supplement: Supplementary file 3 [file Table_3.xlsx]

## Sheet: Note
Supplementary Table S3. Gene lists of upregulated and downregulated genes in NALFD vs CON1 and NASH vs CON2 comparision via RNA-seq.

## Sheet: NAFLD vs. CON1 Up-regulated
gene	gene_id	biotype	strand	locus	6.10-Q-M_FPKM	6.10-Q-C_FPKM	Fold change	log2(fold change)	p_value	FDR	Regulation	6.10-Q-M2_FPKM	6.10-Q-M3_FPKM	6.10-Q-M4_FPKM	6.10-Q-C4_FPKM	6.10-Q-C7_FPKM	6.10-Q-C8_FPKM	GeneID	Synonyms	dbXrefs	chromosome	map_location	description	pathway	GO-CC	GO-MF	GO-BP
Gnai3	ENSMUSG00000000001	protein_coding	-	chr3:108107279-108146146	6.06369	5.44493	1.11364	0.155283	0.4466	0.999241	up	6.47854	6.62794	5.08458	5.5134	5.43577	5.38562	14679	AI158965|AW537698|Galphai3|Gnai-3	MGI:MGI:95773|Ensembl:ENSMUSG00000000001|Vega:OTTMUSG00000007197	3	3 F2.3|3 46.83 cM	guanine nucleotide binding protein (G protein), alpha inhibiting 3	mmu04015(Rap1 signaling pathway)//mmu04022(cGMP-PKG signaling pathway)//mmu04024(cAMP signaling pathway)//mmu04062(Chemokine signaling pathway)//mmu04071(Sphingolipid signaling pathway)//mmu04261(Adrenergic signaling in cardiomyocytes)//mmu04360(Axon guidance)//mmu04530(Tight junction)//mmu04540(Gap junction)//mmu04611(Platelet activation)//mmu04670(Leukocyte transendothelial migration)//mmu04713…	GO:0005886(plasma membrane)//GO:0070062(extracellular exosome)//GO:0005834(heterotrimeric G-protein complex)//GO:0016020(membrane)//GO:0005794(Golgi apparatus)//GO:0005765(lysosomal membrane)//GO:0005813(centrosome)//GO:0030496(midbody)//GO:0045121(membrane raft)//GO:0042588(zymogen granule)//GO:0005856(cytoskeleton)//GO:0005737(cytoplasm)	GO:0019904(protein domain specific binding)//GO:0019001(guanyl nucleotide binding)//GO:0019003(GDP binding)//GO:0004871(signal transducer activity)//GO:0031821(G-protein coupled serotonin receptor binding)//GO:0031683(G-protein beta/gamma-subunit complex binding)//GO:0000166(nucleotide binding)//GO:0005525(GTP binding)//GO:0003924(GTPase activity)//GO:0001664(G-protein coupled receptor binding)//…	GO:0046039(GTP metabolic process)//GO:0006906(vesicle fusion)//GO:0051301(cell division)//GO:0008016(regulation of heart contraction)//GO:0007049(cell cycle)//GO:0007212(dopamine receptor signaling pathway)//GO:0007193(adenylate cyclase-inhibiting G-protein coupled receptor signaling pathway)//GO:0007188(adenylate cyclase-modulating G-protein coupled receptor signaling pathway)//GO:0007186(G-prot…
Pbsn	ENSMUSG00000000003	protein_coding	-	chrX:77837900-77853623	0	0	1	0	1	1	up	0	0	0	0	0	0	54192	PB|Prbs	MGI:MGI:1860484|Ensembl:ENSMUSG00000000003|Vega:OTTMUSG00000017891	X	X|X A7.3	probasin		GO:0005576(extracellular region)	GO:0005215(transporter activity)//GO:0005549(odorant binding)	GO:0006810(transport)
Cdc45	ENSMUSG00000000028	protein_coding	-	chr16:18780446-18835261	1.0448	0.786333	1.32871	0.410021	0.73495	0.999241	up	1.14173	1.35422	0.638464	0.96342	0.908781	0.486799	12544	Cdc45l	MGI:MGI:1338073|Ensembl:ENSMUSG00000000028|Vega:OTTMUSG00000026176	16	16 A3|16 11.63 cM	cell division cycle 45	mmu04110(Cell cycle)	GO:0005813(centrosome)//GO:0005656(nuclear pre-replicative complex)//GO:0005634(nucleus)//GO:0031298(replication fork protection complex)//GO:0031261(DNA replication preinitiation complex)	GO:0003697(single-stranded DNA binding)//GO:0003682(chromatin binding)//GO:0043138(3'-5' DNA helicase activity)//GO:0003688(DNA replication origin binding)	GO:0006267(pre-replicative complex assembly involved in nuclear cell cycle DNA replication)//GO:0031938(regulation of chromatin silencing at telomere)//GO:1902977(mitotic DNA replication preinitiation complex assembly)//GO:0007049(cell cycle)//GO:0000727(double-strand break repair via break-induced replication)//GO:0006260(DNA replication)//GO:0006270(DNA replication initiation)//GO:1900087(posit…
Narf	ENSMUSG00000000056	protein_coding	+	chr11:121237252-121255856	35.9228	27.8714	1.28888	0.366117	0.04845	0.948677	up	33.2789	38.2016	36.288	24.5869	25.9223	33.1049	67608	4430402O11Rik	MGI:MGI:1914858|Ensembl:ENSMUSG00000000056|Vega:OTTMUSG00000004296	11	11|11 E2	nuclear prelamin A recognition factor		GO:0005634(nucleus)//GO:0031981(nuclear lumen)//GO:0005638(lamin filament)	GO:0005521(lamin binding)	GO:0008150(biological_process)
Klf6	ENSMUSG00000000078	protein_coding	+	chr13:5861488-5870393	15.2702	14.6282	1.04388	0.061961	0.7384	0.999241	up	16.0063	14.5986	15.2056	14.6164	13.2997	15.9687	23849	AI448727|BCD1|C86813|CPBP|Copeb|FM2|FM6|Ierepo1|Ierepo3|R75280|Zf9	MGI:MGI:1346318|Ensembl:ENSMUSG00000000078	13	13|13 A1	Kruppel-like factor 6		GO:0005634(nucleus)//GO:0005737(cytoplasm)	GO:0003676(nucleic acid binding)//GO:0003700(transcription factor activity, sequence-specific DNA binding)//GO:0046872(metal ion binding)//GO:0003677(DNA binding)//GO:0003690(double-stranded DNA binding)	GO:0019221(cytokine-mediated signaling pathway)//GO:0006351(transcription, DNA-templated)//GO:0006355(regulation of transcription, DNA-templated)//GO:0045944(positive regulation of transcription from RNA polymerase II promoter)
Scmh1	ENSMUSG00000000085	protein_coding	+	chr4:120405280-120530186	14.0313	11.3334	1.23805	0.30807	0.34325	0.999241	up	17.5002	13.3066	11.2872	12.4051	9.74567	11.8494	29871	AI315320|AI851618|Scml1|Scml3	MGI:MGI:1352762|Ensembl:ENSMUSG00000000085|Vega:OTTMUSG00000008809	4	4 56.52 cM|4 D1-D2	sex comb on midleg homolog 1		GO:0010369(chromocenter)//GO:0005634(nucleus)	GO:0005515(protein binding)	GO:0006338(chromatin remodeling)//GO:0006351(transcription, DNA-templated)//GO:0007283(spermatogenesis)//GO:0009952(anterior/posterior pattern specification)//GO:0007275(multicellular organism development)//GO:0045892(negative regulation of transcription, DNA-templated)//GO:0006355(regulation of transcription, DNA-templated)
Zfy2	ENSMUSG00000000103	protein_coding	-	chrY:2106174-2170409	0	0	1	0	1	1	up	0	0	0	0	0	0	22768	Zfy-2	MGI:MGI:99213|Ensembl:ENSMUSG00000000103|Vega:OTTMUSG00000045372	Y	Y|Y A1	zinc finger protein 2, Y-linked		GO:0005634(nucleus)	GO:0003676(nucleic acid binding)//GO:0003700(transcription factor activity, sequence-specific DNA binding)//GO:0046872(metal ion binding)//GO:0000977(RNA polymerase II regulatory region sequence-specific DNA binding)//GO:0003677(DNA binding)	GO:0007275(multicellular organism development)//GO:0006351(transcription, DNA-templated)//GO:0006355(regulation of transcription, DNA-templated)
Wnt3	ENSMUSG00000000125	protein_coding	+	chr11:103774149-103817957	0	0	1	0	1	1	up	0	0	0	0	0	0	22415	Int-4|Wnt-3	MGI:MGI:98955|Ensembl:ENSMUSG00000000125|Vega:OTTMUSG00000003018	11	11 E1|11 67.5 cM	wingless-type MMTV integration site family, member 3	mmu04310(Wnt signaling pathway)//mmu04340(Hedgehog signaling pathway)//mmu04390(Hippo signaling pathway)//mmu04550(Signaling pathways regulating pluripotency of stem cells)//mmu04916(Melanogenesis)//mmu05166(HTLV-I infection)//mmu05200(Pathways in cancer)//mmu05205(Proteoglycans in cancer)//mmu05206(MicroRNAs in cancer)//mmu05217(Basal cell carcinoma)	GO:0005578(proteinaceous extracellular matrix)//GO:0005576(extracellular region)//GO:0005615(extracellular space)//GO:0005737(cytoplasm)	GO:0005102(receptor binding)//GO:0048018(receptor agonist activity)//GO:0005515(protein binding)//GO:0019904(protein domain specific binding)//GO:0005109(frizzled binding)	GO:0010628(positive regulation of gene expression)//GO:0009948(anterior/posterior axis specification)//GO:0060323(head morphogenesis)//GO:0060174(limb bud formation)//GO:0000902(cell morphogenesis)//GO:0030177(positive regulation of Wnt signaling pathway)//GO:0009887(organ morphogenesis)//GO:0044339(canonical Wnt signaling pathway involved in osteoblast differentiation)//GO:0048697(positive regul…
Wnt9a	ENSMUSG00000000126	protein_coding	+	chr11:59306927-59333552	2.11565	1.82433	1.15969	0.213738	0.40855	0.999241	up	2.73688	1.56595	2.04412	1.8628	1.69621	1.91397	216795	Wnt14	MGI:MGI:2446084|Ensembl:ENSMUSG00000000126|Vega:OTTMUSG00000005790	11	11|11 B1.3	wingless-type MMTV integration site family, member 9A	mmu04310(Wnt signaling pathway)//mmu04340(Hedgehog signaling pathway)//mmu04390(Hippo signaling pathway)//mmu04550(Signaling pathways regulating pluripotency of stem cells)//mmu04916(Melanogenesis)//mmu05166(HTLV-I infection)//mmu05200(Pathways in cancer)//mmu05205(Proteoglycans in cancer)//mmu05217(Basal cell carcinoma)	GO:0005578(proteinaceous extracellular matrix)//GO:0070062(extracellular exosome)//GO:0005576(extracellular region)//GO:0005615(extracellular space)	GO:0005102(receptor binding)//GO:0005515(protein binding)//GO:0005109(frizzled binding)	GO:0045880(positive regulation of smoothened signaling pathway)//GO:0060070(canonical Wnt signaling pathway)//GO:0061037(negative regulation of cartilage development)//GO:0016055(Wnt signaling pathway)//GO:0048856(anatomical structure development)//GO:0032331(negative regulation of chondrocyte differentiation)//GO:0060548(negative regulation of cell death)//GO:0045597(positive regulation of cell …
Fer	ENSMUSG00000000127	protein_coding	+	chr17:63730710-64222946	4.19754	3.60931	1.16298	0.217821	0.35405	0.999241	up	4.68874	3.52974	4.37413	3.50263	3.58208	3.74321	14158	AV082135|C330004K01Rik|Fert|Fert2	MGI:MGI:105917|Ensembl:ENSMUSG00000000127	17	17|17 E1.1	fer (fms/fps related) protein kinase	mmu04520(Adherens junction)	GO:0005886(plasma membrane)//GO:0030027(lamellipodium)//GO:0000790(nuclear chromatin)//GO:0016020(membrane)//GO:0015629(actin cytoskeleton)//GO:0042995(cell projection)//GO:0030054(cell junction)//GO:0015630(microtubule cytoskeleton)//GO:0005634(nucleus)//GO:0031234(extrinsic component of cytoplasmic side of plasma membrane)//GO:0005856(cytoskeleton)//GO:0005737(cytoplasm)	GO:0045296(cadherin binding)//GO:0017137(Rab GTPase binding)//GO:0004713(protein tyrosine kinase activity)//GO:0019901(protein kinase binding)//GO:0004715(non-membrane spanning protein tyrosine kinase activity)//GO:0004672(protein kinase activity)//GO:0005515(protein binding)//GO:0008157(protein phosphatase 1 binding)//GO:0045295(gamma-catenin binding)//GO:0008289(lipid binding)//GO:0000166(nucle…	GO:0010762(regulation of fibroblast migration)//GO:0016310(phosphorylation)//GO:0010591(regulation of lamellipodium assembly)//GO:0044331(cell-cell adhesion mediated by cadherin)//GO:0034614(cellular response to reactive oxygen species)//GO:0043304(regulation of mast cell degranulation)//GO:0001932(regulation of protein phosphorylation)//GO:0038028(insulin receptor signaling pathway via phosphati…
Axin2	ENSMUSG00000000142	protein_coding	+	chr11:108920348-108950783	2.12325	1.43497	1.47965	0.565255	0.20305	0.999241	up	2.71735	2.60921	1.04319	2.19901	1.26946	0.836435	12006	Axi1|Axil|Conductin	MGI:MGI:1270862|Ensembl:ENSMUSG00000000142|Vega:OTTMUSG00000003199	11	11 E1|11 71.83 cM	axin 2	mmu04310(Wnt signaling pathway)//mmu04390(Hippo signaling pathway)//mmu04550(Signaling pathways regulating pluripotency of stem cells)//mmu05200(Pathways in cancer)//mmu05210(Colorectal cancer)//mmu05213(Endometrial cancer)//mmu05217(Basal cell carcinoma)	GO:0005886(plasma membrane)//GO:0005881(cytoplasmic microtubule)//GO:0005938(cell cortex)//GO:0030877(beta-catenin destruction complex)//GO:0043234(protein complex)//GO:0005794(Golgi apparatus)//GO:0014069(postsynaptic density)//GO:0005813(centrosome)//GO:0015630(microtubule cytoskeleton)//GO:0005654(nucleoplasm)//GO:0005634(nucleus)//GO:0005737(cytoplasm)//GO:0016023(cytoplasmic, membrane-bounde…	GO:0031625(ubiquitin protein ligase binding)//GO:0008013(beta-catenin binding)//GO:0019901(protein kinase binding)//GO:0019899(enzyme binding)//GO:0070016(armadillo repeat domain binding)//GO:0070411(I-SMAD binding)//GO:0005096(GTPase activator activity)//GO:0005515(protein binding)	GO:0048255(mRNA stabilization)//GO:0010942(positive regulation of cell death)//GO:0001756(somitogenesis)//GO:0090244(Wnt signaling pathway involved in somitogenesis)//GO:0008285(negative regulation of cell proliferation)//GO:0043570(maintenance of DNA repeat elements)//GO:0035414(negative regulation of catenin import into nucleus)//GO:0070602(regulation of centromeric sister chromatid cohesion)//…
Brat1	ENSMUSG00000000148	protein_coding	+	chr5:140705010-140719379	0.507442	0.359732	1.41061	0.496321	1	1	up	0.633506	0.804414	0.0844062	0.49563	0.520161	0.0634047	231841	AA881470|Baat1	MGI:MGI:1891679|Ensembl:ENSMUSG00000000148|Vega:OTTMUSG00000024801	5	5|5 G2	BRCA1-associated ATM activator 1		GO:0016020(membrane)//GO:0005634(nucleus)//GO:0005737(cytoplasm)		GO:0006974(cellular response to DNA damage stimulus)//GO:0008283(cell proliferation)//GO:0010212(response to ionizing radiation)//GO:0016477(cell migration)//GO:0006006(glucose metabolic process)//GO:0051646(mitochondrion localization)//GO:0001934(positive regulation of protein phosphorylation)//GO:0006915(apoptotic process)//GO:0016049(cell growth)
Gna12	ENSMUSG00000000149	protein_coding	-	chr5:140724126-140830431	3.11486	3.03288	1.02703	0.0384804	0.86755	0.999241	up	3.76686	2.87216	2.70556	3.47212	3.11382	2.51269	14673	AI414047|AI504261|Galpha12	MGI:MGI:95767|Ensembl:ENSMUSG00000000149|Vega:OTTMUSG00000024795	5	5 G2|5 79.3 cM	guanine nucleotide binding protein, alpha 12	mmu04010(MAPK signaling pathway)//mmu04022(cGMP-PKG signaling pathway)//mmu04071(Sphingolipid signaling pathway)//mmu04072(Phospholipase D signaling pathway)//mmu04270(Vascular smooth muscle contraction)//mmu04730(Long-term depression)//mmu04810(Regulation of actin cytoskeleton)//mmu05200(Pathways in cancer)	GO:0016020(membrane)//GO:0031526(brush border membrane)//GO:0005834(heterotrimeric G-protein complex)//GO:0005925(focal adhesion)	GO:0031752(D5 dopamine receptor binding)//GO:0019001(guanyl nucleotide binding)//GO:0031683(G-protein beta/gamma-subunit complex binding)//GO:0004871(signal transducer activity)//GO:0000166(nucleotide binding)//GO:0005525(GTP binding)//GO:0003924(GTPase activity)//GO:0001664(G-protein coupled receptor binding)//GO:0046872(metal ion binding)	GO:0042733(embryonic digit morphogenesis)//GO:0008360(regulation of cell shape)//GO:0007266(Rho protein signal transduction)//GO:0010762(regulation of fibroblast migration)//GO:0007264(small GTPase mediated signal transduction)//GO:0001701(in utero embryonic development)//GO:0032434(regulation of proteasomal ubiquitin-dependent protein catabolic process)//GO:0032006(regulation of TOR signaling)//…
Itgb2l	ENSMUSG00000000157	protein_coding	-	chr16:96361667-96525793	0	0	1	0	1	1	up	0	0	0	0	0	0	16415	5033406G21Rik|pactolus	MGI:MGI:1277979|Ensembl:ENSMUSG00000000157|Vega:OTTMUSG00000020391	16	16|16 C4	integrin beta 2-like	mmu04015(Rap1 signaling pathway)//mmu04145(Phagosome)//mmu04390(Hippo signaling pathway)//mmu04514(Cell adhesion molecules (CAMs))//mmu04610(Complement and coagulation cascades)//mmu04650(Natural killer cell mediated cytotoxicity)//mmu04670(Leukocyte transendothelial migration)//mmu04810(Regulation of actin cytoskeleton)//mmu05133(Pertussis)//mmu05134(Legionellosis)//mmu05140(Leishmaniasis)//mmu0…	GO:0016020(membrane)//GO:0005886(plasma membrane)//GO:0016021(integral component of membrane)//GO:0030141(secretory granule)		GO:0006954(inflammatory response)//GO:0007229(integrin-mediated signaling pathway)
Dlat	ENSMUSG00000000168	protein_coding	-	chr9:50634632-50659780	60.2706	59.0394	1.02085	0.0297777	0.90105	0.999241	up	66.6078	58.4014	55.8026	68.1608	60.9705	47.9868	235339	6332404G05Rik|DLTA|PDC-E2	MGI:MGI:2385311|Ensembl:ENSMUSG00000000168|Vega:OTTMUSG00000016493	9	9|9 A5.3	dihydrolipoamide S-acetyltransferase (E2 component of pyruvate dehydrogenase complex)	mmu00010(Glycolysis / Gluconeogenesis)//mmu00020(Citrate cycle (TCA cycle))//mmu00620(Pyruvate metabolism)//mmu01100(Metabolic pathways)//mmu01200(Carbon metabolism)	GO:0043209(myelin sheath)//GO:0005739(mitochondrion)//GO:0005967(mitochondrial pyruvate dehydrogenase complex)//GO:0045254(pyruvate dehydrogenase complex)	GO:0034604(pyruvate dehydrogenase (NAD+) activity)//GO:0004742(dihydrolipoyllysine-residue acetyltransferase activity)//GO:0016746(transferase activity, transferring acyl groups)//GO:0016740(transferase activity)	GO:0008152(metabolic process)//GO:0006006(glucose metabolic process)//GO:0005975(carbohydrate metabolic process)//GO:0006086(acetyl-CoA biosynthetic process from pyruvate)//GO:0061732(mitochondrial acetyl-CoA biosynthetic process from pyruvate)//GO:0006090(pyruvate metabolic process)//GO:0006099(tricarboxylic acid cycle)
Ccnd2	ENSMUSG00000000184	protein_coding	-	chr6:127125767-127212419	1.41433	1.02335	1.38206	0.466823	0.0657	0.991459	up	1.66394	1.37974	1.19931	0.898802	1.22256	0.948691	12444	2600016F06Rik|AI256817|BF642806|C86853|Vin-1|Vin1|cD2	MGI:MGI:88314|Ensembl:ENSMUSG00000000184|Vega:OTTMUSG00000056347	6	6 F3|6 61.92 cM	cyclin D2	mmu04068(FoxO signaling pathway)//mmu04110(Cell cycle)//mmu04115(p53 signaling pathway)//mmu04151(PI3K-Akt signaling pathway)//mmu04310(Wnt signaling pathway)//mmu04390(Hippo signaling pathway)//mmu04510(Focal adhesion)//mmu04630(Jak-STAT signaling pathway)//mmu04917(Prolactin signaling pathway)//mmu05162(Measles)//mmu05166(HTLV-I infection)//mmu05202(Transcriptional misregulation in cancer)//mmu…	GO:0097129(cyclin D2-CDK4 complex)//GO:0000307(cyclin-dependent protein kinase holoenzyme complex)//GO:0031965(nuclear membrane)//GO:0016020(membrane)//GO:0000785(chromatin)//GO:0005829(cytosol)//GO:0005654(nucleoplasm)//GO:0005730(nucleolus)//GO:0005634(nucleus)//GO:0005737(cytoplasm)	GO:0019901(protein kinase binding)//GO:0005515(protein binding)	GO:0008284(positive regulation of cell proliferation)//GO:0051301(cell division)//GO:0051726(regulation of cell cycle)//GO:0000082(G1/S transition of mitotic cell cycle)//GO:0045737(positive regulation of cyclin-dependent protein serine/threonine kinase activity)//GO:0007049(cell cycle)//GO:0001934(positive regulation of protein phosphorylation)//GO:0050679(positive regulation of epithelial cell …
Gpr107	ENSMUSG00000000194	protein_coding	+	chr2:31152315-31219548	7.06532	4.66486	1.51458	0.598922	0.1016	0.999241	up	6.78265	7.35818	7.05513	3.17922	6.6528	4.16254	277463	9930033D15Rik|AI790205|C530034M11|mKIAA1624	MGI:MGI:2139054|Ensembl:ENSMUSG00000000194|Vega:OTTMUSG00000011925	2	2|2 B	G protein-coupled receptor 107		GO:0030136(clathrin-coated vesicle)//GO:0016020(membrane)//GO:0016021(integral component of membrane)//GO:0005769(early endosome)//GO:0005794(Golgi apparatus)	GO:0005515(protein binding)//GO:0032050(clathrin heavy chain binding)	GO:0072583(clathrin-mediated endocytosis)
Nalcn	ENSMUSG00000000197	protein_coding	-	chr14:123276640-123627144	0.0837047	0.0577338	1.44984	0.535893	1	1	up	0.0581274	0.139815	0.053172	0.0896372	0.0629452	0.020619	338370	A530023G15Rik|AI849508|Vgcnl1	MGI:MGI:2444306|Ensembl:ENSMUSG00000000197	14	14|14 E5	sodium leak channel, non-selective		GO:0016020(membrane)//GO:0005886(plasma membrane)//GO:0016021(integral component of membrane)	GO:0005272(sodium channel activity)//GO:0005244(voltage-gated ion channel activity)//GO:0005261(cation channel activity)//GO:0005216(ion channel activity)	GO:0034765(regulation of ion transmembrane transport)//GO:0006816(calcium ion transport)//GO:0006814(sodium ion transport)//GO:0055085(transmembrane transport)//GO:0006810(transport)//GO:0006811(ion transport)//GO:0086010(membrane depolarization during action potential)//GO:0034220(ion transmembrane transport)
Slfn4	ENSMUSG00000000204	protein_coding	+	chr11:83175185-83190221	0.0514789	0.0409255	1.25787	0.33098	1	1	up	0.0189294	0.0317921	0.103715	0	0.122776	0	20558	AI450778	MGI:MGI:1329010|Ensembl:ENSMUSG00000000204|Vega:OTTMUSG00000000920	11	11|11 C	schlafen 4		GO:0005575(cellular_component)	GO:0003674(molecular_function)	GO:0008150(biological_process)
Th	ENSMUSG00000000214	protein_coding	-	chr7:142892751-142931128	0	0	1	0	1	1	up	0	0	0	0	0	0	21823	-	MGI:MGI:98735|Ensembl:ENSMUSG00000000214|Vega:OTTMUSG00000018790	7	7 F5|7 88.06 cM	tyrosine hydroxylase	mmu00350(Tyrosine metabolism)//mmu01100(Metabolic pathways)//mmu04728(Dopaminergic synapse)//mmu04917(Prolactin signaling pathway)//mmu05012(Parkinson's disease)//mmu05030(Cocaine addiction)//mmu05031(Amphetamine addiction)//mmu05034(Alcoholism)	GO:0030659(cytoplasmic vesicle membrane)//GO:0009898(cytoplasmic side of plasma membrane)//GO:0043204(perikaryon)//GO:0043005(neuron projection)//GO:0005790(smooth endoplasmic reticulum)//GO:0030425(dendrite)//GO:0030424(axon)//GO:0005829(cytosol)//GO:0043195(terminal bouton)//GO:0008021(synaptic vesicle)//GO:0005739(mitochondrion)//GO:0031410(cytoplasmic vesicle)//GO:0033162(melanosome membrane)…	GO:0005506(iron ion binding)//GO:0008199(ferric iron binding)//GO:0019904(protein domain specific binding)//GO:0004511(tyrosine 3-monooxygenase activity)//GO:0019899(enzyme binding)//GO:0016491(oxidoreductase activity)//GO:0035240(dopamine binding)//GO:0008198(ferrous iron binding)//GO:0004497(monooxygenase activity)//GO:0019825(oxygen binding)//GO:0034617(tetrahydrobiopterin binding)//GO:0046872…	GO:0055114(oxidation-reduction process)//GO:0042462(eye photoreceptor cell development)//GO:0048596(embryonic camera-type eye morphogenesis)//GO:0001963(synaptic transmission, dopaminergic)//GO:0007613(memory)//GO:0007507(heart development)//GO:0042136(neurotransmitter biosynthetic process)//GO:0009887(organ morphogenesis)//GO:0042416(dopamine biosynthetic process)//GO:0008016(regulation of heart…
Ins2	ENSMUSG00000000215	protein_coding	-	chr7:142678655-142699510	0	0	1	0	1	1	up	0	0	0	0	0	0	16334	AA986540|Ins-2|InsII|Mody|Mody4	MGI:MGI:96573|Ensembl:ENSMUSG00000000215|Vega:OTTMUSG00000018794	7	7 F5|7 88.0 cM	insulin II	mmu04014(Ras signaling pathway)//mmu04015(Rap1 signaling pathway)//mmu04022(cGMP-PKG signaling pathway)//mmu04066(HIF-1 signaling pathway)//mmu04068(FoxO signaling pathway)//mmu04072(Phospholipase D signaling pathway)//mmu04114(Oocyte meiosis)//mmu04140(Regulation of autophagy)//mmu04150(mTOR signaling pathway)//mmu04151(PI3K-Akt signaling pathway)//mmu04152(AMPK signaling pathway)//mmu04211(Long…	GO:0005576(extracellular region)//GO:0005829(cytosol)//GO:0005634(nucleus)//GO:0005732(small nucleolar ribonucleoprotein complex)//GO:0005615(extracellular space)//GO:0005737(cytoplasm)//GO:0030141(secretory granule)	GO:0002020(protease binding)//GO:0032403(protein complex binding)//GO:0042802(identical protein binding)//GO:0005159(insulin-like growth factor receptor binding)//GO:0005179(hormone activity)//GO:0005158(insulin receptor binding)	GO:0002674(negative regulation of acute inflammatory response)//GO:0050715(positive regulation of cytokine secretion)//GO:0045821(positive regulation of glycolytic process)//GO:0060266(negative regulation of respiratory burst involved in inflammatory response)//GO:0007257(activation of JUN kinase activity)//GO:0016042(lipid catabolic process)//GO:0010628(positive regulation of gene expression)//G…
Scnn1g	ENSMUSG00000000216	protein_coding	+	chr7:121734478-121768475	0.00862555	0	inf	inf	1	1	up	0	0	0.0258767	0	0	0	20278	SCNEG	MGI:MGI:104695|Ensembl:ENSMUSG00000000216|Vega:OTTMUSG00000024632	7	7 F2|7 65.07 cM	sodium channel, nonvoltage-gated 1 gamma	mmu04742(Taste transduction)//mmu04960(Aldosterone-regulated sodium reabsorption)	GO:0005886(plasma membrane)//GO:0005887(integral component of plasma membrane)//GO:0009986(cell surface)//GO:0016020(membrane)//GO:0009897(external side of plasma membrane)//GO:0070062(extracellular exosome)//GO:0016021(integral component of membrane)//GO:0034706(sodium channel complex)//GO:0016324(apical plasma membrane)	GO:0005272(sodium channel activity)//GO:0050699(WW domain binding)//GO:0015280(ligand-gated sodium channel activity)//GO:0005216(ion channel activity)	GO:0035725(sodium ion transmembrane transport)//GO:0055078(sodium ion homeostasis)//GO:0035313(wound healing, spreading of epidermal cells)//GO:0050891(multicellular organismal water homeostasis)//GO:0050909(sensory perception of taste)//GO:0006814(sodium ion transport)//GO:0006810(transport)//GO:0050896(response to stimulus)//GO:0006811(ion transport)
Tspan32	ENSMUSG00000000244	protein_coding	+	chr7:142988968-143019644	0.019659	0.0178136	1.10359	0.14221	1	1	up	0	0	0.0589771	0.0534409	0	0	27027	AW208513|Art-1|BB235973|D7Wsu37e|Phemx|Tssc6	MGI:MGI:1350360|Ensembl:ENSMUSG00000000244|Vega:OTTMUSG00000018786	7	7 F5|7 88.09 cM	tetraspanin 32		GO:0005622(intracellular)//GO:0016021(integral component of membrane)//GO:0070442(integrin alphaIIb-beta3 complex)//GO:0009986(cell surface)//GO:0016020(membrane)	GO:0003674(molecular_function)	GO:0007010(cytoskeleton organization)//GO:0007596(blood coagulation)//GO:0042832(defense response to protozoan)//GO:0070527(platelet aggregation)//GO:0008285(negative regulation of cell proliferation)//GO:0030886(negative regulation of myeloid dendritic cell activation)//GO:0007229(integrin-mediated signaling pathway)//GO:0050688(regulation of defense response to virus)//GO:0007599(hemostasis)
Lhx2	ENSMUSG00000000247	protein_coding	+	chr2:38339280-38369733	0.0149644	0	inf	inf	1	1	up	0	0.0448933	0	0	0	0	16870	LH2A|Lh-2|Lim2|ap|apterous	MGI:MGI:96785|Ensembl:ENSMUSG00000000247|Vega:OTTMUSG00000012866	2	2|2 B	LIM homeobox protein 2		GO:0005622(intracellular)//GO:0005634(nucleus)	GO:0008270(zinc ion binding)//GO:0043565(sequence-specific DNA binding)//GO:0003682(chromatin binding)//GO:0001076(transcription factor activity, RNA polymerase II transcription factor binding)//GO:0046872(metal ion binding)//GO:0005515(protein binding)//GO:0003677(DNA binding)	GO:0021987(cerebral cortex development)//GO:0022008(neurogenesis)//GO:0001843(neural tube closure)//GO:0030182(neuron differentiation)//GO:0045893(positive regulation of transcription, DNA-templated)//GO:0006351(transcription, DNA-templated)//GO:0001942(hair follicle development)//GO:2000678(negative regulation of transcription regulatory region DNA binding)//GO:0045944(positive regulation of tra…
Clec2g	ENSMUSG00000000248	protein_coding	+	chr6:128934380-128984707	0.0374936	0	inf	inf	1	1	up	0.112481	0	0	0	0	0	70809	4632413B12Rik|Clr-c|Clr-d|Clrc|Clrd|Clrx|Ddv10|Ocilrp1	MGI:MGI:1918059|Ensembl:ENSMUSG00000000248|Vega:OTTMUSG00000028623	6	6|6 F3	C-type lectin domain family 2, member g		GO:0016020(membrane)//GO:0005886(plasma membrane)//GO:0005615(extracellular space)//GO:0016021(integral component of membrane)	GO:0030246(carbohydrate binding)//GO:0046703(natural killer cell lectin-like receptor binding)	GO:0045671(negative regulation of osteoclast differentiation)
Gmpr	ENSMUSG00000000253	protein_coding	+	chr13:45507443-45546382	53.5174	47.2794	1.13194	0.178797	0.357	0.999241	up	52.5291	55.3818	52.6414	42.6036	49.1726	50.0619	66355	2310004P21Rik|AV028449|GMPR 1	MGI:MGI:1913605|Ensembl:ENSMUSG00000000253|Vega:OTTMUSG00000023421	13	13|13 A5	guanosine monophosphate reductase	mmu00230(Purine metabolism)	GO:0005575(cellular_component)//GO:1902560(GMP reductase complex)	GO:0003920(GMP reductase activity)//GO:0003824(catalytic activity)//GO:0016491(oxidoreductase activity)//GO:0046872(metal ion binding)	GO:0055114(oxidation-reduction process)//GO:0006144(purine nucleobase metabolic process)//GO:0009117(nucleotide metabolic process)
Glra1	ENSMUSG00000000263	protein_coding	-	chr11:55514237-55608657	0	0	1	0	1	1	up	0	0	0	0	0	0	14654	nmf11|oscillator|ot|spasmodic|spd	MGI:MGI:95747|Ensembl:ENSMUSG00000000263|Vega:OTTMUSG00000005698	11	11 B1.3|11 33.12 cM	glycine receptor, alpha 1 subunit	mmu04080(Neuroactive ligand-receptor interaction)	GO:0005886(plasma membrane)//GO:0005887(integral component of plasma membrane)//GO:0060077(inhibitory synapse)//GO:0043005(neuron projection)//GO:0016020(membrane)//GO:0042995(cell projection)//GO:0009897(external side of plasma membrane)//GO:0045202(synapse)//GO:0043231(intracellular membrane-bounded organelle)//GO:0030054(cell junction)//GO:0016021(integral component of membrane)//GO:0034707(ch…	GO:0008270(zinc ion binding)//GO:0016933(extracellular-glycine-gated ion channel activity)//GO:0005254(chloride channel activity)//GO:0016594(glycine binding)//GO:0046872(metal ion binding)//GO:0030977(taurine binding)//GO:0005230(extracellular ligand-gated ion channel activity)//GO:0016934(extracellular-glycine-gated chloride channel activity)//GO:0022824(transmitter-gated ion channel activity)	GO:0050884(neuromuscular process controlling posture)//GO:0006821(chloride transport)//GO:0051260(protein homooligomerization)//GO:0071230(cellular response to amino acid stimulus)//GO:1902476(chloride transmembrane transport)//GO:0006820(anion transport)//GO:2000344(positive regulation of acrosome reaction)//GO:0060080(inhibitory postsynaptic potential)//GO:0050905(neuromuscular process)//GO:007…
Mid2	ENSMUSG00000000266	protein_coding	+	chrX:140664598-140767715	1.50894	1.17979	1.27899	0.355005	0.1434	0.999241	up	1.60471	1.39187	1.53022	1.42114	0.924082	1.19415	23947	FXY2|Trim1	MGI:MGI:1344333|Ensembl:ENSMUSG00000000266|Vega:OTTMUSG00000018849	X	X F1|X 61.35 cM	midline 2		GO:0005622(intracellular)//GO:0070062(extracellular exosome)//GO:0005856(cytoskeleton)//GO:0005737(cytoplasm)//GO:0005874(microtubule)	GO:0070740(tubulin-glutamic acid ligase activity)//GO:0008270(zinc ion binding)//GO:0070739(protein-glutamic acid ligase activity)//GO:0070735(protein-glycine ligase activity)//GO:0008766(UDP-N-acetylmuramoylalanyl-D-glutamyl-2,6-diaminopimelate-D-alanyl-D-alanine ligase activity)//GO:0042803(protein homodimerization activity)//GO:0070737(protein-glycine ligase activity, elongating)//GO:0018169(r…	GO:0010508(positive regulation of autophagy)//GO:0043123(positive regulation of I-kappaB kinase/NF-kappaB signaling)//GO:0045087(innate immune response)//GO:0035372(protein localization to microtubule)//GO:0046597(negative regulation of viral entry into host cell)//GO:0051091(positive regulation of sequence-specific DNA binding transcription factor activity)//GO:1902187(negative regulation of vir…
Trim25	ENSMUSG00000000275	protein_coding	+	chr11:88999375-89020293	1.85297	1.77623	1.0432	0.0610161	0.7929	0.999241	up	1.92082	1.84344	1.79465	1.63348	1.83748	1.85774	217069	AA960166|AL022677|EFP|Zfp147	MGI:MGI:102749|Ensembl:ENSMUSG00000000275|Vega:OTTMUSG00000001304	11	11|11 C	tripartite motif-containing 25	mmu04064(NF-kappa B signaling pathway)//mmu04622(RIG-I-like receptor signaling pathway)//mmu05164(Influenza A)	GO:0005654(nucleoplasm)//GO:0005737(cytoplasm)	GO:0008270(zinc ion binding)//GO:0004842(ubiquitin-protein transferase activity)//GO:0016874(ligase activity)//GO:0044822(poly(A) RNA binding)//GO:0046872(metal ion binding)//GO:1904264(ubiquitin protein ligase activity involved in ERAD pathway)//GO:0016740(transferase activity)	GO:0043123(positive regulation of I-kappaB kinase/NF-kappaB signaling)//GO:0045087(innate immune response)//GO:1902186(regulation of viral release from host cell)//GO:0046596(regulation of viral entry into host cell)//GO:0016567(protein ubiquitination)//GO:0046597(negative regulation of viral entry into host cell)//GO:0051607(defense response to virus)//GO:0042787(protein ubiquitination involved …
Scpep1	ENSMUSG00000000278	protein_coding	-	chr11:88905927-88955465	3.70754	2.99403	1.23831	0.308374	0.2291	0.999241	up	3.98655	4.3205	2.81558	3.84635	2.48118	2.65457	74617	2410018F01Rik|4833411K15Rik|AI957256|Risc	MGI:MGI:1921867|Ensembl:ENSMUSG00000000278|Vega:OTTMUSG00000001271	11	11|11 C	serine carboxypeptidase 1		GO:0070062(extracellular exosome)//GO:0005576(extracellular region)//GO:0005829(cytosol)	GO:0008233(peptidase activity)//GO:0004180(carboxypeptidase activity)//GO:0016787(hydrolase activity)//GO:0004185(serine-type carboxypeptidase activity)	GO:0006508(proteolysis)//GO:0045776(negative regulation of blood pressure)//GO:0045909(positive regulation of vasodilation)//GO:0051603(proteolysis involved in cellular protein catabolic process)
Itgb2	ENSMUSG00000000290	protein_coding	+	chr10:77530251-77565708	0.477087	0.459494	1.03829	0.0542049	1	1	up	0.296415	0.745931	0.388914	0.857126	0.319791	0.201565	16414	2E6|AI528527|Cd18|LAD|LCAMB|Lfa1|MF17	MGI:MGI:96611|Ensembl:ENSMUSG00000000290|Vega:OTTMUSG00000019985	10	10 C1|10 39.72 cM	integrin beta 2	mmu04015(Rap1 signaling pathway)//mmu04145(Phagosome)//mmu04390(Hippo signaling pathway)//mmu04514(Cell adhesion molecules (CAMs))//mmu04610(Complement and coagulation cascades)//mmu04650(Natural killer cell mediated cytotoxicity)//mmu04670(Leukocyte transendothelial migration)//mmu04810(Regulation of actin cytoskeleton)//mmu05133(Pertussis)//mmu05134(Legionellosis)//mmu05140(Leishmaniasis)//mmu0…	GO:0005886(plasma membrane)//GO:0070062(extracellular exosome)//GO:0043235(receptor complex)//GO:0009986(cell surface)//GO:0016020(membrane)//GO:1903561(extracellular vesicle)//GO:0016021(integral component of membrane)//GO:0045121(membrane raft)//GO:0008305(integrin complex)//GO:0034687(integrin alphaL-beta2 complex)	GO:0032403(protein complex binding)//GO:0004872(receptor activity)//GO:0030369(ICAM-3 receptor activity)//GO:0046982(protein heterodimerization activity)//GO:0019901(protein kinase binding)//GO:0050839(cell adhesion molecule binding)//GO:0046872(metal ion binding)//GO:0005515(protein binding)//GO:0001948(glycoprotein binding)	GO:0050798(activated T cell proliferation)//GO:0007159(leukocyte cell-cell adhesion)//GO:0045429(positive regulation of nitric oxide biosynthetic process)//GO:0045766(positive regulation of angiogenesis)//GO:0034113(heterotypic cell-cell adhesion)//GO:0071404(cellular response to low-density lipoprotein particle stimulus)//GO:0051092(positive regulation of NF-kappaB transcription factor activity)…
Hddc2	ENSMUSG00000000295	protein_coding	+	chr10:30820186-31750439	11.0964	9.76871	1.13591	0.18385	0.69405	0.999241	up	10.8315	14.0164	8.44128	10.1892	10.3583	8.75862	69692	2310057G13Rik	MGI:MGI:1916942|Ensembl:ENSMUSG00000000295|Vega:OTTMUSG00000028054	10	10|10 A4	HD domain containing 2		GO:0005739(mitochondrion)//GO:0070062(extracellular exosome)	GO:0003674(molecular_function)	GO:0008150(biological_process)
Cdh4	ENSMUSG00000000305	protein_coding	+	chr2:179442430-179899373	1.67496	0.936425	1.78868	0.838892	0.0138	0.625713	up	2.39869	1.51216	1.11404	0.0752488	0.456552	2.27747	12561	AW120700|R-CAD|R-Cadh|Rcad	MGI:MGI:99218|Ensembl:ENSMUSG00000000305|Vega:OTTMUSG00000016217	2	2 H4|2 101.86 cM	cadherin 4	mmu04514(Cell adhesion molecules (CAMs))	GO:0016020(membrane)//GO:0005886(plasma membrane)//GO:0005887(integral component of plasma membrane)//GO:0016021(integral component of membrane)	GO:0046872(metal ion binding)//GO:0005509(calcium ion binding)	GO:0045773(positive regulation of axon extension)//GO:0007156(homophilic cell adhesion via plasma membrane adhesion molecules)//GO:0007155(cell adhesion)//GO:0007411(axon guidance)//GO:0007157(heterophilic cell-cell adhesion via plasma membrane cell adhesion molecules)
Ckmt1	ENSMUSG00000000308	protein_coding	+	chr2:121357713-121387168	0	0	1	0	1	1	up	0	0	0	0	0	0	12716	Mt-CK|ScCKmit|UbCKmit|mi-CK	MGI:MGI:99441|Ensembl:ENSMUSG00000000308|Vega:OTTMUSG00000015261	2	2 60.37 cM|2 F1-F3	creatine kinase, mitochondrial 1, ubiquitous	mmu00330(Arginine and proline metabolism)//mmu01100(Metabolic pathways)	GO:0016020(membrane)//GO:0005743(mitochondrial inner membrane)//GO:0005739(mitochondrion)//GO:0043209(myelin sheath)//GO:0070062(extracellular exosome)	GO:0005524(ATP binding)//GO:0016772(transferase activity, transferring phosphorus-containing groups)//GO:0000166(nucleotide binding)//GO:0016301(kinase activity)//GO:0003824(catalytic activity)//GO:0004111(creatine kinase activity)//GO:0005515(protein binding)//GO:0016740(transferase activity)	GO:0016310(phosphorylation)//GO:0032091(negative regulation of protein binding)//GO:0043066(negative regulation of apoptotic process)
Bcl6b	ENSMUSG00000000317	protein_coding	-	chr11:70224127-70229798	1.06306	0.542565	1.95931	0.970349	0.0186	0.714962	up	1.81845	0.752601	0.618113	0.796885	0.564587	0.266222	12029	Bazf	MGI:MGI:1278332|Ensembl:ENSMUSG00000000317|Vega:OTTMUSG00000006040	11	11|11 B4	B cell CLL/lymphoma 6, member B		GO:0005634(nucleus)	GO:0003676(nucleic acid binding)//GO:0001227(transcriptional repressor activity, RNA polymerase II transcription regulatory region sequence-specific binding)//GO:0000977(RNA polymerase II regulatory region sequence-specific DNA binding)//GO:0046872(metal ion binding)//GO:0005515(protein binding)//GO:0003677(DNA binding)	GO:0030099(myeloid cell differentiation)//GO:0050767(regulation of neurogenesis)//GO:0000122(negative regulation of transcription from RNA polymerase II promoter)
Clec10a	ENSMUSG00000000318	protein_coding	+	chr11:70156196-70170834	1.95131	1.36745	1.42698	0.512961	0.36965	0.999241	up	1.53817	3.59969	0.716075	0.994965	2.24911	0.85826	17312	CD301a|M-ASGP-BP-1|Mgl|Mgl1	MGI:MGI:96975|Ensembl:ENSMUSG00000000318|Vega:OTTMUSG00000006033	11	11 B3|11 42.99 cM	C-type lectin domain family 10, member A		GO:0016020(membrane)//GO:0016021(integral component of membrane)	GO:0030246(carbohydrate binding)	GO:0002248(connective tissue replacement involved in inflammatory response wound healing)
Rtca	ENSMUSG00000000339	protein_coding	-	chr3:116488962-116508208	15.8476	15.6295	1.01396	0.0199957	0.93875	0.999241	up	17.4887	18.2387	11.8154	15.4068	16.1512	15.3303	66368	2310009A18Rik|AI450277|RPC|Rtcd1	MGI:MGI:1913618|Ensembl:ENSMUSG00000000339|Vega:OTTMUSG00000027075	3	3|3 G1	RNA 3'-terminal phosphate cyclase		GO:0005654(nucleoplasm)//GO:0005634(nucleus)	GO:0005524(ATP binding)//GO:0003723(RNA binding)//GO:0000166(nucleotide binding)//GO:0016874(ligase activity)//GO:0003824(catalytic activity)//GO:0044822(poly(A) RNA binding)//GO:0003963(RNA-3'-phosphate cyclase activity)	GO:0006396(RNA processing)
Rem1	ENSMUSG00000000359	protein_coding	+	chr2:152626950-152637996	0.950938	0.451528	2.10605	1.07454	0.29335	0.999241	up	0.743313	1.69625	0.413253	0.5281	0.509221	0.317263	19700	E030011C07Rik|Ras|Rem	MGI:MGI:1097696|Ensembl:ENSMUSG00000000359|Vega:OTTMUSG00000015816	2	2|2 H2	rad and gem related GTP binding protein 1		GO:0016020(membrane)//GO:0005575(cellular_component)	GO:0000166(nucleotide binding)//GO:0005516(calmodulin binding)//GO:0005525(GTP binding)	GO:0007264(small GTPase mediated signal transduction)//GO:0008150(biological_process)//GO:0007165(signal transduction)
Trappc10	ENSMUSG00000000374	protein_coding	-	chr10:78186724-78244642	6.71388	5.62364	1.19387	0.255642	0.1769	0.999241	up	7.01622	6.41072	6.7147	4.81919	5.86486	6.18688	216131	B230307C21Rik|Gm870|Tmem1	MGI:MGI:1336209|Ensembl:ENSMUSG00000000374	10	10 C1|10 39.72 cM	trafficking protein particle complex 10		GO:0005794(Golgi apparatus)//GO:1990071(TRAPPII protein complex)	GO:0003674(molecular_function)	GO:0006810(transport)//GO:0016192(vesicle-mediated transport)//GO:0006891(intra-Golgi vesicle-mediated transport)//GO:0034498(early endosome to Golgi transport)
Ccm2	ENSMUSG00000000378	protein_coding	+	chr11:6546886-6596744	6.00822	4.70869	1.27599	0.351614	0.30675	0.999241	up	8.57097	4.35144	5.10226	4.46185	4.6402	5.02401	216527	BC029157	MGI:MGI:2384924|Ensembl:ENSMUSG00000000378|Vega:OTTMUSG00000005120	11	11|11 A1	cerebral cavernous malformation 2		GO:0043234(protein complex)//GO:0005737(cytoplasm)	GO:0005515(protein binding)	GO:0048839(inner ear development)//GO:0007507(heart development)//GO:0035264(multicellular organism growth)//GO:0001944(vasculature development)//GO:0061154(endothelial tube morphogenesis)//GO:0060837(blood vessel endothelial cell differentiation)//GO:0001701(in utero embryonic development)//GO:0001568(blood vessel development)//GO:0001885(endothelial cell development)//GO:0060039(pericardium dev…
Wap	ENSMUSG00000000381	protein_coding	-	chr11:6635481-6638637	0	0	1	0	1	1	up	0	0	0	0	0	0	22373	-	MGI:MGI:98943|Ensembl:ENSMUSG00000000381|Vega:OTTMUSG00000005118	11	11 A1|11 4.61 cM	whey acidic protein	mmu04917(Prolactin signaling pathway)	GO:0005576(extracellular region)	GO:0030414(peptidase inhibitor activity)//GO:0045735(nutrient reservoir activity)	GO:0010466(negative regulation of peptidase activity)
Tmprss2	ENSMUSG00000000385	protein_coding	-	chr16:96592078-98101041	0	0	1	0	1	1	up	0	0	0	0	0	0	50528	D16Ertd61e	MGI:MGI:1354381|Ensembl:ENSMUSG00000000385	16	16 C2|16 57.53 cM	transmembrane protease, serine 2	mmu05164(Influenza A)//mmu05202(Transcriptional misregulation in cancer)	GO:0016020(membrane)//GO:0005886(plasma membrane)//GO:0070062(extracellular exosome)//GO:0005576(extracellular region)//GO:0016021(integral component of membrane)	GO:0008233(peptidase activity)//GO:0005044(scavenger receptor activity)//GO:0004252(serine-type endopeptidase activity)//GO:0016787(hydrolase activity)//GO:0008236(serine-type peptidase activity)	GO:0006508(proteolysis)//GO:0016540(protein autoprocessing)//GO:0046598(positive regulation of viral entry into host cell)
Mx1	ENSMUSG00000000386	protein_coding	-	chr16:96592078-98101041	0.0296186	0.00528758	5.60157	2.48583	1	1	up	0.0831193	0	0.00573656	0.00613511	0.00400974	0.00571788	17857	AI893580|Mx|Mx-1	MGI:MGI:97243|Ensembl:ENSMUSG00000000386|Vega:OTTMUSG00000016636	16	16 C4|16 57.46 cM	MX dynamin-like GTPase 1		GO:0005783(endoplasmic reticulum)//GO:0016020(membrane)//GO:0005634(nucleus)//GO:0005737(cytoplasm)	GO:0000166(nucleotide binding)//GO:0005515(protein binding)//GO:0005525(GTP binding)//GO:0003924(GTPase activity)	GO:0009615(response to virus)//GO:0051607(defense response to virus)//GO:0002376(immune system process)//GO:0045087(innate immune response)
Gcg	ENSMUSG00000000394	protein_coding	-	chr2:62474529-62483650	0	0	1	0	1	1	up	0	0	0	0	0	0	14526	GLP-1|Glu|PPG	MGI:MGI:95674|Ensembl:ENSMUSG00000000394|Vega:OTTMUSG00000012783	2	2 C1.3|2 35.85 cM	glucagon	mmu04911(Insulin secretion)//mmu04922(Glucagon signaling pathway)	GO:0005576(extracellular region)//GO:0005615(extracellular space)//GO:0005737(cytoplasm)	GO:0005179(hormone activity)//GO:0031769(glucagon receptor binding)	GO:0042594(response to starvation)//GO:0032099(negative regulation of appetite)//GO:0050796(regulation of insulin secretion)//GO:1900118(negative regulation of execution phase of apoptosis)//GO:0070374(positive regulation of ERK1 and ERK2 cascade)//GO:0051571(positive regulation of histone H3-K4 methylation)//GO:0033138(positive regulation of peptidyl-serine phosphorylation)//GO:0035948(positive …
Egfl6	ENSMUSG00000000402	protein_coding	-	chrX:166523006-166585720	0.190262	0.155499	1.22355	0.291075	1	1	up	0.131357	0.0945028	0.344925	0.242688	0.0567097	0.1671	54156	Maeg	MGI:MGI:1858599|Ensembl:ENSMUSG00000000402|Vega:OTTMUSG00000019543	X	X F5|X 77.66 cM	EGF-like-domain, multiple 6		GO:0005578(proteinaceous extracellular matrix)//GO:0005604(basement membrane)//GO:0005576(extracellular region)//GO:0016020(membrane)	GO:0005509(calcium ion binding)	GO:0030198(extracellular matrix organization)//GO:0010811(positive regulation of cell-substrate adhesion)//GO:0007275(multicellular organism development)//GO:0007155(cell adhesion)//GO:0030154(cell differentiation)
Tssk3	ENSMUSG00000000411	protein_coding	-	chr4:129489013-129491022	0.195739	0.147685	1.32538	0.406401	1	1	up	0.587216	0	0	0.067596	0.251885	0.123575	58864	1700014N07Rik|4930594I21Rik|Stk22c|Stk22d|Tsk-3|Tssk-3|Tssk3b	MGI:MGI:1929914|Ensembl:ENSMUSG00000000411|Vega:OTTMUSG00000009663	4	4|4 D2.3	testis-specific serine kinase 3		GO:0005622(intracellular)//GO:0005634(nucleus)//GO:0005737(cytoplasm)	GO:0004674(protein serine/threonine kinase activity)//GO:0004672(protein kinase activity)//GO:0000166(nucleotide binding)//GO:0016301(kinase activity)//GO:0046872(metal ion binding)//GO:0005524(ATP binding)//GO:0016740(transferase activity)	GO:0016310(phosphorylation)//GO:0006468(protein phosphorylation)//GO:0007283(spermatogenesis)//GO:0030154(cell differentiation)//GO:0007275(multicellular organism development)//GO:0048240(sperm capacitation)//GO:0035556(intracellular signal transduction)
Galnt1	ENSMUSG00000000420	protein_coding	+	chr18:24205343-24286818	32.148	23.9757	1.34086	0.423156	0.0244	0.771995	up	34.6788	30.0502	31.7151	22.7206	22.2682	26.9383	14423	-	MGI:MGI:894693|Ensembl:ENSMUSG00000000420|Vega:OTTMUSG00000036067	18	18|18 B1	UDP-N-acetyl-alpha-D-galactosamine:polypeptide N-acetylgalactosaminyltransferase 1	mmu00512(Mucin type O-Glycan biosynthesis)//mmu01100(Metabolic pathways)	GO:0005794(Golgi apparatus)//GO:0016021(integral component of membrane)//GO:0048471(perinuclear region of cytoplasm)//GO:0005576(extracellular region)//GO:0016020(membrane)	GO:0004653(polypeptide N-acetylgalactosaminyltransferase activity)//GO:0016757(transferase activity, transferring glycosyl groups)//GO:0030246(carbohydrate binding)//GO:0046872(metal ion binding)//GO:0016740(transferase activity)//GO:0030145(manganese ion binding)	GO:0006493(protein O-linked glycosylation)//GO:0018242(protein O-linked glycosylation via serine)//GO:0018243(protein O-linked glycosylation via threonine)
Mkrn2	ENSMUSG00000000439	protein_coding	+	chr6:115601937-115677136	22.0112	21.4262	1.0273	0.0388602	0.8968	0.999241	up	23.4218	21.8471	20.7646	20.0419	20.967	23.2698	67027	2610002L04Rik|C81377	MGI:MGI:1914277|Ensembl:ENSMUSG00000000439|Vega:OTTMUSG00000056677	6	6|6 E3	makorin, ring finger protein, 2		GO:0005622(intracellular)	GO:0070740(tubulin-glutamic acid ligase activity)//GO:0008270(zinc ion binding)//GO:0070739(protein-glutamic acid ligase activity)//GO:0070735(protein-glycine ligase activity)//GO:0008766(UDP-N-acetylmuramoylalanyl-D-glutamyl-2,6-diaminopimelate-D-alanyl-D-alanine ligase activity)//GO:0070737(protein-glycine ligase activity, elongating)//GO:0018169(ribosomal S6-glutamic acid ligase activity)//GO:…	GO:0008150(biological_process)
Raf1	ENSMUSG00000000441	protein_coding	-	chr6:115601937-115677136	31.9731	30.0202	1.06505	0.0909277	0.7812	0.999241	up	29.3924	32.4248	34.1021	29.0859	32.3852	28.5894	110157	6430402F14Rik|AA990557|BB129353|Craf1|D830050J10Rik|Raf-1|c-Raf|v-Raf	MGI:MGI:97847|Ensembl:ENSMUSG00000000441|Vega:OTTMUSG00000020697	6	6 C3|6 53.62 cM	v-raf-leukemia viral oncogene 1	mmu04010(MAPK signaling pathway)//mmu04012(ErbB signaling pathway)//mmu04014(Ras signaling pathway)//mmu04015(Rap1 signaling pathway)//mmu04022(cGMP-PKG signaling pathway)//mmu04024(cAMP signaling pathway)//mmu04062(Chemokine signaling pathway)//mmu04068(FoxO signaling pathway)//mmu04071(Sphingolipid signaling pathway)//mmu04072(Phospholipase D signaling pathway)//mmu04151(PI3K-Akt signaling path…	GO:0005886(plasma membrane)//GO:0016020(membrane)//GO:0005794(Golgi apparatus)//GO:0005829(cytosol)//GO:0005739(mitochondrion)//GO:0031143(pseudopodium)//GO:0005634(nucleus)//GO:0005737(cytoplasm)	GO:0004674(protein serine/threonine kinase activity)//GO:0031434(mitogen-activated protein kinase kinase binding)//GO:0004672(protein kinase activity)//GO:0017016(Ras GTPase binding)//GO:0046982(protein heterodimerization activity)//GO:0004709(MAP kinase kinase kinase activity)//GO:0042802(identical protein binding)//GO:0000166(nucleotide binding)//GO:0016301(kinase activity)//GO:0046872(metal io…	GO:0071550(death-inducing signaling complex assembly)//GO:0001678(cellular glucose homeostasis)//GO:0048011(neurotrophin TRK receptor signaling pathway)//GO:0008285(negative regulation of cell proliferation)//GO:0043066(negative regulation of apoptotic process)//GO:0031333(negative regulation of protein complex assembly)//GO:0035994(response to muscle stretch)//GO:0030878(thyroid gland developmen…
Sept1	ENSMUSG00000000486	protein_coding	-	chr7:127214446-127218498	0.595915	0.48184	1.23675	0.306552	1	1	up	0	1.13413	0.653618	0.34495	0.477553	0.623017	54204	Diff6|Pnutl3	MGI:MGI:1858916|Ensembl:ENSMUSG00000000486|Vega:OTTMUSG00000022181	7	7|7 F4	septin 1	mmu05100(Bacterial invasion of epithelial cells)	GO:0030496(midbody)//GO:0072687(meiotic spindle)//GO:0005856(cytoskeleton)//GO:0005737(cytoplasm)	GO:0000166(nucleotide binding)//GO:0005525(GTP binding)	GO:0007056(spindle assembly involved in female meiosis)//GO:0007049(cell cycle)//GO:0051301(cell division)//GO:0051311(meiotic metaphase plate congression)
Acvr1b	ENSMUSG00000000532	protein_coding	+	chr15:101174103-101213678	9.21514	8.1713	1.12775	0.173441	0.3743	0.999241	up	7.82502	10.927	8.8934	5.1947	8.51472	10.8045	11479	6820432J04|ActR-IB|ActRIB|Acvrlk4|Alk4|SKR2	MGI:MGI:1338944|Ensembl:ENSMUSG00000000532|Vega:OTTMUSG00000048171	15	15 F2|15 56.48 cM	activin A receptor, type 1B	mmu04060(Cytokine-cytokine receptor interaction)//mmu04350(TGF-beta signaling pathway)//mmu04550(Signaling pathways regulating pluripotency of stem cells)	GO:0048179(activin receptor complex)//GO:0005886(plasma membrane)//GO:0005887(integral component of plasma membrane)//GO:0009986(cell surface)//GO:0043235(receptor complex)//GO:0016020(membrane)//GO:0016021(integral component of membrane)//GO:0070062(extracellular exosome)	GO:0017002(activin-activated receptor activity)//GO:0004674(protein serine/threonine kinase activity)//GO:0004702(receptor signaling protein serine/threonine kinase activity)//GO:0004672(protein kinase activity)//GO:0016361(activin receptor activity, type I)//GO:0019838(growth factor binding)//GO:0046872(metal ion binding)//GO:0000166(nucleotide binding)//GO:0016301(kinase activity)//GO:0034711(i…	GO:0016310(phosphorylation)//GO:0010628(positive regulation of gene expression)//GO:0009966(regulation of signal transduction)//GO:0007166(cell surface receptor signaling pathway)//GO:0018107(peptidyl-threonine phosphorylation)//GO:0045648(positive regulation of erythrocyte differentiation)//GO:0010629(negative regulation of gene expression)//GO:0010862(positive regulation of pathway-restricted S…
Tom1l2	ENSMUSG00000000538	protein_coding	-	chr11:60226713-60352905	14.7337	11.9652	1.23138	0.300276	0.2913	0.999241	up	14.2628	14.1041	15.8343	8.60778	12.455	14.8329	216810	2900016I08Rik|A730055F12Rik|AU042072|Srebf1	MGI:MGI:2443306|Ensembl:ENSMUSG00000000538|Vega:OTTMUSG00000005819	11	11|11 B2	target of myb1-like 2 (chicken)		GO:0005622(intracellular)//GO:0070062(extracellular exosome)	GO:0019901(protein kinase binding)//GO:0030276(clathrin binding)	GO:0006810(transport)//GO:0045839(negative regulation of mitotic nuclear division)//GO:0015031(protein transport)//GO:0006886(intracellular protein transport)//GO:0007165(signal transduction)
Gpa33	ENSMUSG00000000544	protein_coding	+	chr1:166130237-166166510	0	0	1	0	1	1	up	0	0	0	0	0	0	59290	2010310L10Rik|2210401D16Rik|BB116197	MGI:MGI:1891703|Ensembl:ENSMUSG00000000544|Vega:OTTMUSG00000016903	1	1 H2.3|1 73.49 cM	glycoprotein A33 (transmembrane)		GO:0005886(plasma membrane)//GO:0070062(extracellular exosome)//GO:0009986(cell surface)//GO:0016020(membrane)//GO:0016021(integral component of membrane)//GO:0005911(cell-cell junction)		GO:0016337(single organismal cell-cell adhesion)
Gabra2	ENSMUSG00000000560	protein_coding	-	chr5:70961056-71095849	0	0	1	0	1	1	up	0	0	0	0	0	0	14395	C630048P16Rik|Gabra-2	MGI:MGI:95614|Ensembl:ENSMUSG00000000560|Vega:OTTMUSG00000054189	5	5 C3.1|5 37.59 cM	gamma-aminobutyric acid (GABA) A receptor, subunit alpha 2	mmu04080(Neuroactive ligand-receptor interaction)//mmu04723(Retrograde endocannabinoid signaling)//mmu04727(GABAergic synapse)//mmu04742(Taste transduction)//mmu05032(Morphine addiction)//mmu05033(Nicotine addiction)	GO:0098794(postsynapse)//GO:0005886(plasma membrane)//GO:1902711(GABA-A receptor complex)//GO:0016020(membrane)//GO:0030425(dendrite)//GO:0034707(chloride channel complex)//GO:0030424(axon)//GO:0016021(integral component of membrane)//GO:0045202(synapse)//GO:0030054(cell junction)//GO:0032590(dendrite membrane)//GO:0060077(inhibitory synapse)//GO:0043025(neuronal cell body)//GO:0045211(postsynapt…	GO:0004890(GABA-A receptor activity)//GO:0008503(benzodiazepine receptor activity)//GO:0005254(chloride channel activity)//GO:0005230(extracellular ligand-gated ion channel activity)//GO:0005216(ion channel activity)	GO:0006821(chloride transport)//GO:0007214(gamma-aminobutyric acid signaling pathway)//GO:0001505(regulation of neurotransmitter levels)//GO:0006810(transport)//GO:0006836(neurotransmitter transport)//GO:0006811(ion transport)
Gm2a	ENSMUSG00000000594	protein_coding	+	chr11:55098114-55113029	2.44557	2.28672	1.06946	0.0968878	0.6752	0.999241	up	2.80955	2.39367	2.13348	2.07349	2.26937	2.51731	14667	AA408702|AW215435|GM2-AP|SAP-3	MGI:MGI:95762|Ensembl:ENSMUSG00000000594|Vega:OTTMUSG00000005683	11	11 B1.3|11 32.13 cM	GM2 ganglioside activator protein	mmu04142(Lysosome)	GO:0005764(lysosome)//GO:0005739(mitochondrion)	GO:0016787(hydrolase activity)//GO:0008047(enzyme activator activity)//GO:0004563(beta-N-acetylhexosaminidase activity)	GO:0019915(lipid storage)//GO:0009313(oligosaccharide catabolic process)//GO:0006689(ganglioside catabolic process)//GO:0006629(lipid metabolic process)//GO:0050877(neurological system process)//GO:0006665(sphingolipid metabolic process)//GO:0007611(learning or memory)//GO:0050885(neuromuscular process controlling balance)
Krit1	ENSMUSG00000000600	protein_coding	+	chr5:3803164-3844515	3.33545	2.90105	1.14974	0.201309	0.556	0.999241	up	2.45014	3.37705	4.17916	3.70303	2.23235	2.76777	79264	2010007K12Rik|A630036P20Rik|AA432855|AI450393|AI643869|BB155247|BB235701|Ccm1	MGI:MGI:1930618|Ensembl:ENSMUSG00000000600|Vega:OTTMUSG00000053024	5	5 A1|5 2.26 cM	KRIT1, ankyrin repeat containing	mmu04015(Rap1 signaling pathway)	GO:0005886(plasma membrane)//GO:0005874(microtubule)//GO:0016020(membrane)//GO:0043234(protein complex)//GO:0005856(cytoskeleton)//GO:0030054(cell junction)//GO:0005737(cytoplasm)//GO:0005615(extracellular space)//GO:0005911(cell-cell junction)	GO:0005546(phosphatidylinositol-4,5-bisphosphate binding)//GO:0030695(GTPase regulator activity)//GO:0008017(microtubule binding)//GO:0005515(protein binding)//GO:0032403(protein complex binding)	GO:0010596(negative regulation of endothelial cell migration)//GO:0001937(negative regulation of endothelial cell proliferation)//GO:0032092(positive regulation of protein binding)//GO:0045454(cell redox homeostasis)//GO:0016525(negative regulation of angiogenesis)//GO:2000114(regulation of establishment of cell polarity)//GO:2000352(negative regulation of endothelial cell apoptotic process)//GO:…
Clcn4-2	ENSMUSG00000000605	protein_coding	-	chr7:7282315-7299511	12.1166	10.5795	1.14529	0.195709	0.2865	0.999241	up	12.092	11.8828	12.3749	10.2503	10.4474	11.0409
Vmn2r88	ENSMUSG00000000606	protein_coding	+	chr14:51361674-51662953	0	0	1	0	1	1	up	0	0	0	0	0	0	669149	V2r13|V2r3	MGI:MGI:1316662|Ensembl:ENSMUSG00000000606|Vega:OTTMUSG00000033227	14	14|14 C1	vomeronasal 2, receptor 88
Grm6	ENSMUSG00000000617	protein_coding	+	chr11:50850684-50866208	0	0	1	0	1	1	up	0	0	0	0	0	0	108072	BC021919|Gm3|Gprc1f|mGluR6|nerg1|nob2|nob3|nob4	MGI:MGI:1351343|Ensembl:ENSMUSG00000000617|Vega:OTTMUSG00000007883	11	11|11 B1.3	glutamate receptor, metabotropic 6	mmu04072(Phospholipase D signaling pathway)//mmu04080(Neuroactive ligand-receptor interaction)//mmu04724(Glutamatergic synapse)	GO:0035841(new growing cell tip)//GO:0005886(plasma membrane)//GO:0005887(integral component of plasma membrane)//GO:0005789(endoplasmic reticulum membrane)//GO:0005794(Golgi apparatus)//GO:0016021(integral component of membrane)//GO:0042995(cell projection)//GO:0000139(Golgi membrane)//GO:0016020(membrane)//GO:0005783(endoplasmic reticulum)//GO:0042734(presynaptic membrane)//GO:0045211(postsynap…	GO:0001640(adenylate cyclase inhibiting G-protein coupled glutamate receptor activity)//GO:0042803(protein homodimerization activity)//GO:0004871(signal transducer activity)//GO:0008066(glutamate receptor activity)//GO:0001642(group III metabotropic glutamate receptor activity)//GO:0004930(G-protein coupled receptor activity)	GO:0060041(retina development in camera-type eye)//GO:0051966(regulation of synaptic transmission, glutamatergic)//GO:0050953(sensory perception of light stimulus)//GO:0090280(positive regulation of calcium ion import)//GO:0007216(G-protein coupled glutamate receptor signaling pathway)//GO:0007626(locomotory behavior)//GO:0007601(visual perception)//GO:0050908(detection of light stimulus involved…
Sema4f	ENSMUSG00000000627	protein_coding	-	chr6:82911884-82939769	0.0137248	0.00658782	2.08337	1.05892	1	1	up	0.0257709	0.0154037	0	0.0197634	0	0	20355	Sema W	MGI:MGI:1340055|Ensembl:ENSMUSG00000000627|Vega:OTTMUSG00000021185	6	6 C3|6 35.94 cM	sema domain, immunoglobulin domain (Ig), TM domain, and short cytoplasmic domain	mmu04360(Axon guidance)	GO:0005886(plasma membrane)//GO:0016020(membrane)//GO:0016021(integral component of membrane)//GO:0045211(postsynaptic membrane)//GO:0045202(synapse)//GO:0005783(endoplasmic reticulum)//GO:0005615(extracellular space)	GO:0045499(chemorepellent activity)//GO:0005515(protein binding)//GO:0030215(semaphorin receptor binding)	GO:0007411(axon guidance)//GO:0030517(negative regulation of axon extension)//GO:0071526(semaphorin-plexin signaling pathway)//GO:0048843(negative regulation of axon extension involved in axon guidance)//GO:0030154(cell differentiation)//GO:0050919(negative chemotaxis)//GO:0031290(retinal ganglion cell axon guidance)//GO:0007275(multicellular organism development)//GO:0007399(nervous system devel…
Sez6	ENSMUSG00000000632	protein_coding	+	chr11:77930799-77979048	0.0130057	0.00726523	1.79013	0.840068	1	1	up	0.020533	0.0184842	0	0	0	0.0217957	20370	BSRP-C|D11Bhm177e|sez-6	MGI:MGI:104745|Ensembl:ENSMUSG00000000632|Vega:OTTMUSG00000000068	11	11 B5|11 46.74 cM	seizure related gene 6		GO:0005886(plasma membrane)//GO:0005576(extracellular region)//GO:0016020(membrane)//GO:0048471(perinuclear region of cytoplasm)//GO:0042995(cell projection)//GO:0016021(integral component of membrane)//GO:0043197(dendritic spine)//GO:0045202(synapse)//GO:0030054(cell junction)//GO:0097440(apical dendrite)//GO:0005783(endoplasmic reticulum)//GO:0043198(dendritic shaft)//GO:0005615(extracellular s…	GO:0003674(molecular_function)	GO:0050773(regulation of dendrite development)//GO:0060079(excitatory postsynaptic potential)//GO:1900006(positive regulation of dendrite development)//GO:0060074(synapse maturation)//GO:0090036(regulation of protein kinase C signaling)//GO:0008344(adult locomotory behavior)//GO:2000171(negative regulation of dendrite development)//GO:0021680(cerebellar Purkinje cell layer development)
Haao	ENSMUSG00000000673	protein_coding	-	chr17:83831355-83846790	0.0552508	0.0220888	2.5013	1.32268	1	1	up	0	0.165753	0	0	0.0662664	0	107766	0610007K21Rik|0610012J07Rik|3-HAO|3-HAOxase|3HAO	MGI:MGI:1349444|Ensembl:ENSMUSG00000000673	17	17|17 E4	3-hydroxyanthranilate 3,4-dioxygenase	mmu00380(Tryptophan metabolism)//mmu01100(Metabolic pathways)	GO:0031966(mitochondrial membrane)//GO:0070062(extracellular exosome)//GO:0005737(cytoplasm)//GO:0005829(cytosol)	GO:0016491(oxidoreductase activity)//GO:0008198(ferrous iron binding)//GO:0005506(iron ion binding)//GO:0019825(oxygen binding)//GO:0000334(3-hydroxyanthranilate 3,4-dioxygenase activity)//GO:0051213(dioxygenase activity)//GO:0046872(metal ion binding)	GO:0055114(oxidation-reduction process)//GO:0046874(quinolinate metabolic process)//GO:0070050(neuron cellular homeostasis)//GO:0034354('de novo' NAD biosynthetic process from tryptophan)//GO:0010043(response to zinc ion)//GO:0046686(response to cadmium ion)//GO:0019363(pyridine nucleotide biosynthetic process)
Abhd15	ENSMUSG00000000686	protein_coding	+	chr11:77508098-77607815	0.264135	0.0583161	4.52937	2.17931	1	1	up	0.507427	0.168107	0.11687	0.0308374	0.144111	0	67477	1300007F04Rik	MGI:MGI:1914727|Ensembl:ENSMUSG00000000686|Vega:OTTMUSG00000008183	11	11|11 B5	abhydrolase domain containing 15		GO:0016020(membrane)//GO:0005576(extracellular region)	GO:0043907(Cys-tRNA(Pro) hydrolase activity)//GO:0080031(methyl salicylate esterase activity)//GO:0050253(retinyl-palmitate esterase activity)//GO:0043906(Ala-tRNA(Pro) hydrolase activity)//GO:0018732(sulfolactone hydrolase activity)//GO:0080032(methyl jasmonate esterase activity)//GO:0016787(hydrolase activity)//GO:0003674(molecular_function)//GO:0043905(Ser-tRNA(Thr) hydrolase activity)//GO:005…	GO:0008150(biological_process)
Hoxb6	ENSMUSG00000000690	protein_coding	+	chr11:96291023-96306910	0.334281	0.28423	1.17609	0.234004	1	1	up	0.623697	0.258297	0.120849	0.383047	0.0794743	0.390168	15414	Hox-2.2	MGI:MGI:96187|Ensembl:ENSMUSG00000000690|Vega:OTTMUSG00000001988	11	11 D|11 59.82 cM	homeobox B6		GO:0005634(nucleus)	GO:0044822(poly(A) RNA binding)//GO:0043565(sequence-specific DNA binding)//GO:0003677(DNA binding)//GO:0003700(transcription factor activity, sequence-specific DNA binding)	GO:0048706(embryonic skeletal system development)//GO:0006351(transcription, DNA-templated)//GO:0009952(anterior/posterior pattern specification)//GO:0007275(multicellular organism development)//GO:0034101(erythrocyte homeostasis)//GO:0048704(embryonic skeletal system morphogenesis)//GO:0006355(regulation of transcription, DNA-templated)
Loxl3	ENSMUSG00000000693	protein_coding	+	chr6:83034172-83057682	1.42735	0.880169	1.62167	0.697482	0.48255	0.999241	up	0.441845	2.28654	1.55365	1.22207	0.757721	0.660719	16950	Lor2|Loxl2	MGI:MGI:1337004|Ensembl:ENSMUSG00000000693|Vega:OTTMUSG00000022487	6	6 C3|6 35.94 cM	lysyl oxidase-like 3		GO:0016020(membrane)//GO:0005576(extracellular region)	GO:0043912(D-lysine oxidase activity)//GO:0005507(copper ion binding)//GO:0016641(oxidoreductase activity, acting on the CH-NH2 group of donors, oxygen as acceptor)//GO:0016491(oxidoreductase activity)//GO:0015922(aspartate oxidase activity)//GO:0005044(scavenger receptor activity)//GO:0046872(metal ion binding)	GO:0055114(oxidation-reduction process)//GO:0045892(negative regulation of transcription, DNA-templated)//GO:0001837(epithelial to mesenchymal transition)
Tcl1b5	ENSMUSG00000000701	protein_coding	+	chr12:105176357-105181143	0	0	1	0	1	1	up	0	0	0	0	0	0	27382	D12Ertd644e	MGI:MGI:1351635|Ensembl:ENSMUSG00000000701	12	12 E|12 55.23 cM	T cell leukemia/lymphoma 1B, 5
Btn1a1	ENSMUSG00000000706	protein_coding	-	chr13:23313524-23577011	0	0	1	0	1	1	up	0	0	0	0	0	0	12231	Btn	MGI:MGI:103118|Ensembl:ENSMUSG00000000706|Vega:OTTMUSG00000000742	13	13 A3.1|13 9.72 cM	butyrophilin, subfamily 1, member A1		GO:0016020(membrane)//GO:0016021(integral component of membrane)//GO:0005615(extracellular space)	GO:0005515(protein binding)
Kat2b	ENSMUSG00000000708	protein_coding	+	chr17:53566860-53672720	38.8189	34.1962	1.13518	0.182925	0.6457	0.999241	up	40.7888	37.041	38.627	30.1273	35.6009	36.8603	18519	A930006P13Rik|AI461839|AW536563|Pcaf|p/CAF	MGI:MGI:1343094|Ensembl:ENSMUSG00000000708|Vega:OTTMUSG00000035538	17	17 C|17 27.86 cM	K(lysine) acetyltransferase 2B	mmu04330(Notch signaling pathway)//mmu04919(Thyroid hormone signaling pathway)//mmu05166(HTLV-I infection)//mmu05203(Viral carcinogenesis)	GO:0031672(A band)//GO:0005671(Ada2/Gcn5/Ada3 transcription activator complex)//GO:0000790(nuclear chromatin)//GO:0000776(kinetochore)//GO:0031674(I band)//GO:0005829(cytosol)//GO:0042641(actomyosin)//GO:0005634(nucleus)//GO:0000123(histone acetyltransferase complex)	GO:0035035(histone acetyltransferase binding)//GO:0003712(transcription cofactor activity)//GO:0032403(protein complex binding)//GO:0008080(N-acetyltransferase activity)//GO:0004468(lysine N-acetyltransferase activity, acting on acetyl phosphate as donor)//GO:0016407(acetyltransferase activity)//GO:0003682(chromatin binding)//GO:0000977(RNA polymerase II regulatory region sequence-specific DNA bi…	GO:0010976(positive regulation of neuron projection development)//GO:0018394(peptidyl-lysine acetylation)//GO:0045736(negative regulation of cyclin-dependent protein serine/threonine kinase activity)//GO:0048511(rhythmic process)//GO:0008285(negative regulation of cell proliferation)//GO:0006473(protein acetylation)//GO:0071442(positive regulation of histone H3-K14 acetylation)//GO:0045893(positi…
Cryba1	ENSMUSG00000000724	protein_coding	-	chr11:77686154-77741921	0	0	1	0	1	1	up	0	0	0	0	0	0	12957	BA3/A1|Cryb	MGI:MGI:88518|Ensembl:ENSMUSG00000000724|Vega:OTTMUSG00000008185	11	11 46.74 cM|11 B-C1	crystallin, beta A1		GO:0005634(nucleus)//GO:0005737(cytoplasm)	GO:0005212(structural constituent of eye lens)//GO:0042803(protein homodimerization activity)	GO:2000210(positive regulation of anoikis)//GO:0032007(negative regulation of TOR signaling)//GO:0001818(negative regulation of cytokine production)//GO:0007601(visual perception)//GO:0014067(negative regulation of phosphatidylinositol 3-kinase signaling)//GO:0043010(camera-type eye development)//GO:0070373(negative regulation of ERK1 and ERK2 cascade)//GO:0051898(negative regulation of protein k…
Aire	ENSMUSG00000000731	protein_coding	-	chr10:78030021-78063622	0	0	1	0	1	1	up	0	0	0	0	0	0	11634	-	MGI:MGI:1338803|Ensembl:ENSMUSG00000000731|Vega:OTTMUSG00000034126	10	10 C1|10 39.72 cM	autoimmune regulator (autoimmune polyendocrinopathy candidiasis ectodermal dystrophy)	mmu04120(Ubiquitin mediated proteolysis)//mmu05340(Primary immunodeficiency)	GO:0005622(intracellular)//GO:0005634(nucleus)//GO:0005737(cytoplasm)	GO:0044212(transcription regulatory region DNA binding)//GO:0008270(zinc ion binding)//GO:0003712(transcription cofactor activity)//GO:0003682(chromatin binding)//GO:0042393(histone binding)//GO:0000977(RNA polymerase II regulatory region sequence-specific DNA binding)//GO:0042802(identical protein binding)//GO:0046872(metal ion binding)//GO:0003677(DNA binding)//GO:0045182(translation regulator …	GO:0006351(transcription, DNA-templated)//GO:0006959(humoral immune response)//GO:0045944(positive regulation of transcription from RNA polymerase II promoter)//GO:0045060(negative thymic T cell selection)//GO:0006355(regulation of transcription, DNA-templated)//GO:0045893(positive regulation of transcription, DNA-templated)
Spg7	ENSMUSG00000000738	protein_coding	+	chr8:119910359-124345724	40.3953	34.7335	1.16301	0.217859	0.78445	0.999241	up	44.9689	32.9068	43.31	32.5854	36.8118	34.8033	234847	AI452278|AU015315|Cmar|PGN	MGI:MGI:2385906|Ensembl:ENSMUSG00000000738|Vega:OTTMUSG00000022131	8	8|8 E1	spastic paraplegia 7 homolog (human)		GO:0016020(membrane)//GO:0016021(integral component of membrane)//GO:0005739(mitochondrion)//GO:0005745(m-AAA complex)	GO:0008237(metallopeptidase activity)//GO:0008233(peptidase activity)//GO:0008270(zinc ion binding)//GO:0004222(metalloendopeptidase activity)//GO:0005524(ATP binding)//GO:0004176(ATP-dependent peptidase activity)//GO:0000166(nucleotide binding)//GO:0046872(metal ion binding)//GO:0016787(hydrolase activity)	GO:0030155(regulation of cell adhesion)//GO:0007155(cell adhesion)//GO:0007005(mitochondrion organization)//GO:0006508(proteolysis)//GO:0007399(nervous system development)//GO:0008089(anterograde axonal transport)
Chmp1a	ENSMUSG00000000743	protein_coding	-	chr8:119910359-124345724	9.8443	9.23342	1.06616	0.0924235	0.93575	0.999241	up	9.69431	10.0385	9.80004	8.1286	10.1271	9.44454	234852	2900018H07Rik|Pcoln3	MGI:MGI:1920159|Ensembl:ENSMUSG00000000743|Vega:OTTMUSG00000036037	8	8|8 E1	charged multivesicular body protein 1A	mmu04144(Endocytosis)	GO:0000794(condensed nuclear chromosome)//GO:0005768(endosome)//GO:0005634(nucleus)//GO:0005815(microtubule organizing center)//GO:0012505(endomembrane system)//GO:0016363(nuclear matrix)//GO:0070062(extracellular exosome)//GO:0016020(membrane)//GO:0000815(ESCRT III complex)//GO:0005769(early endosome)//GO:0005737(cytoplasm)	GO:0042803(protein homodimerization activity)//GO:0005515(protein binding)//GO:0019904(protein domain specific binding)//GO:0042802(identical protein binding)	GO:0007080(mitotic metaphase plate congression)//GO:0016458(gene silencing)//GO:0045892(negative regulation of transcription, DNA-templated)//GO:1901673(regulation of mitotic spindle assembly)//GO:0015031(protein transport)//GO:0051301(cell division)//GO:0006351(transcription, DNA-templated)//GO:0007049(cell cycle)//GO:0010824(regulation of centrosome duplication)//GO:0000920(cell separation afte…
Rpa1	ENSMUSG00000000751	protein_coding	-	chr11:75298165-75348383	17.8077	17.1134	1.04057	0.0573807	0.7652	0.999241	up	16.1359	20.3456	16.9417	15.1303	19.0782	17.1316	68275	5031405K23Rik|70kDa|AA589576|AW557552|RF-A|RP-A|Rpa	MGI:MGI:1915525|Ensembl:ENSMUSG00000000751|Vega:OTTMUSG00000006199	11	11 B5|11 45.79 cM	replication protein A1	mmu03030(DNA replication)//mmu03420(Nucleotide excision repair)//mmu03430(Mismatch repair)//mmu03440(Homologous recombination)//mmu03460(Fanconi anemia pathway)	GO:0000794(condensed nuclear chromosome)//GO:0000800(lateral element)//GO:0001673(male germ cell nucleus)//GO:0005662(DNA replication factor A complex)//GO:0000784(nuclear chromosome, telomeric region)//GO:0000793(condensed chromosome)//GO:0016605(PML body)//GO:0005654(nucleoplasm)//GO:0005634(nucleus)	GO:0003676(nucleic acid binding)//GO:0003682(chromatin binding)//GO:0003684(damaged DNA binding)//GO:0003697(single-stranded DNA binding)//GO:0046872(metal ion binding)//GO:0003677(DNA binding)	GO:0000723(telomere maintenance)//GO:0008284(positive regulation of cell proliferation)//GO:0007126(meiotic nuclear division)//GO:0006974(cellular response to DNA damage stimulus)//GO:0051276(chromosome organization)//GO:0006310(DNA recombination)//GO:0006284(base-excision repair)//GO:0030097(hemopoiesis)//GO:0001701(in utero embryonic development)//GO:0006298(mismatch repair)//GO:0006289(nucleot…
Oprm1	ENSMUSG00000000766	protein_coding	+	chr10:6740628-7052478	0	0	1	0	1	1	up	0	0	0	0	0	0	18390	M-OR-1|MOP-R|MOR-1|MOR-1O|Oprm|mor|muOR	MGI:MGI:97441|Ensembl:ENSMUSG00000000766|Vega:OTTMUSG00000023338	10	10 1.85 cM|10 A2	opioid receptor, mu 1	mmu04080(Neuroactive ligand-receptor interaction)//mmu04915(Estrogen signaling pathway)//mmu05032(Morphine addiction)	GO:0005886(plasma membrane)//GO:0005887(integral component of plasma membrane)//GO:0043204(perikaryon)//GO:0043005(neuron projection)//GO:0016020(membrane)//GO:0030425(dendrite)//GO:0016021(integral component of membrane)//GO:0045121(membrane raft)//GO:0032839(dendrite cytoplasm)//GO:0005737(cytoplasm)//GO:0032590(dendrite membrane)//GO:0005925(focal adhesion)//GO:0042383(sarcolemma)	GO:0005245(voltage-gated calcium channel activity)//GO:0019904(protein domain specific binding)//GO:0004871(signal transducer activity)//GO:0001965(G-protein alpha-subunit binding)//GO:0031681(G-protein beta-subunit binding)//GO:0004985(opioid receptor activity)//GO:0004930(G-protein coupled receptor activity)//GO:0038047(morphine receptor activity)//GO:0004979(beta-endorphin receptor activity)//…	GO:0061358(negative regulation of Wnt protein secretion)//GO:0032100(positive regulation of appetite)//GO:0007193(adenylate cyclase-inhibiting G-protein coupled receptor signaling pathway)//GO:0050769(positive regulation of neurogenesis)//GO:0071315(cellular response to morphine)//GO:0038003(opioid receptor signaling pathway)//GO:0031635(adenylate cyclase-inhibiting opioid receptor signaling path…
Ddx3x	ENSMUSG00000000787	protein_coding	+	chrX:13280969-13294055	69.1027	60.5923	1.14045	0.189607	0.37445	0.999241	up	70.705	72.9702	63.6329	49.6921	63.7188	68.3661	13205	D1Pas1-rs2|Ddx3|Fin14	MGI:MGI:103064|Ensembl:ENSMUSG00000000787|Vega:OTTMUSG00000017078	X	X A1.1|X 8.17 cM	DEAD/H (Asp-Glu-Ala-Asp/His) box polypeptide 3, X-linked	mmu04622(RIG-I-like receptor signaling pathway)//mmu05161(Hepatitis B)//mmu05203(Viral carcinogenesis)	GO:0070062(extracellular exosome)//GO:0016020(membrane)//GO:0022627(cytosolic small ribosomal subunit)//GO:0005739(mitochondrion)//GO:0036464(cytoplasmic ribonucleoprotein granule)//GO:0005741(mitochondrial outer membrane)//GO:0005852(eukaryotic translation initiation factor 3 complex)//GO:0005634(nucleus)//GO:0005737(cytoplasm)//GO:0010494(cytoplasmic stress granule)	GO:0004003(ATP-dependent DNA helicase activity)//GO:0008134(transcription factor binding)//GO:0004004(ATP-dependent RNA helicase activity)//GO:0016787(hydrolase activity)//GO:0008190(eukaryotic initiation factor 4E binding)//GO:0003676(nucleic acid binding)//GO:0017111(nucleoside-triphosphatase activity)//GO:0003924(GTPase activity)//GO:0016887(ATPase activity)//GO:0035613(RNA stem-loop binding)/…	GO:0010628(positive regulation of gene expression)//GO:0045727(positive regulation of translation)//GO:0097193(intrinsic apoptotic signaling pathway)//GO:0071243(cellular response to arsenic-containing substance)//GO:0043066(negative regulation of apoptotic process)//GO:0009615(response to virus)//GO:0031333(negative regulation of protein complex assembly)//GO:0007059(chromosome segregation)//GO:…
Kcnn3	ENSMUSG00000000794	protein_coding	+	chr3:89520163-89667761	0.098127	0.0594431	1.65077	0.72314	1	1	up	0.196449	0.04418	0.0537522	0.125775	0.0265126	0.026042	140493	KCa2.3|SK3|SKCA3	MGI:MGI:2153183|Ensembl:ENSMUSG00000000794|Vega:OTTMUSG00000027213	3	3|3 F2	potassium intermediate/small conductance calcium-activated channel, subfamily N, member 3	mmu04911(Insulin secretion)	GO:0005886(plasma membrane)//GO:0043005(neuron projection)//GO:0016020(membrane)//GO:0016021(integral component of membrane)//GO:0030175(filopodium)//GO:0031594(neuromuscular junction)//GO:0044297(cell body)//GO:0005737(cytoplasm)//GO:0043025(neuronal cell body)	GO:0015269(calcium-activated potassium channel activity)//GO:0046982(protein heterodimerization activity)//GO:0005516(calmodulin binding)//GO:0016286(small conductance calcium-activated potassium channel activity)	GO:1903955(positive regulation of protein targeting to mitochondrion)//GO:0006810(transport)//GO:0006813(potassium ion transport)//GO:0006811(ion transport)
Usp32	ENSMUSG00000000804	protein_coding	-	chr11:84984441-85140161	3.69955	3.40896	1.08524	0.118018	0.59875	0.999241	up	4.02275	3.60858	3.46731	3.04062	3.28567	3.90058	237898	2900074J03Rik|6430526O11Rik|AW045245	MGI:MGI:2144475|Ensembl:ENSMUSG00000000804|Vega:OTTMUSG00000001019	11	11|11 C	ubiquitin specific peptidase 32		GO:0005794(Golgi apparatus)//GO:0005737(cytoplasm)
Txnrd3	ENSMUSG00000000811	protein_coding	+	chr6:89643987-89675529	1.43507	1.39794	1.02656	0.0378167	0.8942	0.999241	up	1.34953	1.50614	1.44955	1.09674	1.29504	1.80205	232223	AI196535|TR2|Tgr	MGI:MGI:2386711|Ensembl:ENSMUSG00000000811|Vega:OTTMUSG00000021186	6	6|6 D1	thioredoxin reductase 3	mmu00240(Pyrimidine metabolism)//mmu00450(Selenocompound metabolism)	GO:0005783(endoplasmic reticulum)//GO:0043231(intracellular membrane-bounded organelle)//GO:0005634(nucleus)//GO:0005737(cytoplasm)	GO:0016668(oxidoreductase activity, acting on a sulfur group of donors, NAD(P) as acceptor)//GO:0004791(thioredoxin-disulfide reductase activity)//GO:0016491(oxidoreductase activity)//GO:0009055(electron carrier activity)//GO:0015035(protein disulfide oxidoreductase activity)//GO:0050660(flavin adenine dinucleotide binding)//GO:0005515(protein binding)	GO:0055114(oxidation-reduction process)//GO:0030154(cell differentiation)//GO:0007283(spermatogenesis)//GO:0007275(multicellular organism development)//GO:0045454(cell redox homeostasis)//GO:0006810(transport)//GO:0006749(glutathione metabolic process)
Fasl	ENSMUSG00000000817	protein_coding	-	chr1:161780690-161788495	0	0	1	0	1	1	up	0	0	0	0	0	0	14103	APT1LG1|CD178|CD95-L|CD95L|Fas-L|Faslg|Tnfsf6|Tnlg1a|gld	MGI:MGI:99255|Ensembl:ENSMUSG00000000817|Vega:OTTMUSG00000050992	1	1 H2.1|1 69.95 cM	Fas ligand (TNF superfamily, member 6)	mmu04010(MAPK signaling pathway)//mmu04014(Ras signaling pathway)//mmu04060(Cytokine-cytokine receptor interaction)//mmu04068(FoxO signaling pathway)//mmu04151(PI3K-Akt signaling pathway)//mmu04210(Apoptosis)//mmu04650(Natural killer cell mediated cytotoxicity)//mmu04722(Neurotrophin signaling pathway)//mmu04932(Non-alcoholic fatty liver disease (NAFLD))//mmu04940(Type I diabetes mellitus)//mmu05…	GO:0005886(plasma membrane)//GO:0070062(extracellular exosome)//GO:0005576(extracellular region)//GO:0009986(cell surface)//GO:0005901(caveola)//GO:0009897(external side of plasma membrane)//GO:0016020(membrane)//GO:0048471(perinuclear region of cytoplasm)//GO:0005764(lysosome)//GO:0045121(membrane raft)//GO:0016021(integral component of membrane)//GO:0031410(cytoplasmic vesicle)//GO:0005634(nucl…	GO:0005164(tumor necrosis factor receptor binding)//GO:0005125(cytokine activity)//GO:0005123(death receptor binding)	GO:0097527(necroptotic signaling pathway)//GO:0070266(necroptotic process)//GO:0097190(apoptotic signaling pathway)//GO:0000122(negative regulation of transcription from RNA polymerase II promoter)//GO:0006955(immune response)//GO:0016525(negative regulation of angiogenesis)//GO:0046666(retinal cell programmed cell death)//GO:0030644(cellular chloride ion homeostasis)//GO:0048388(endosomal lumen …
Znf512b	ENSMUSG00000000823	protein_coding	-	chr2:181569148-181655660	2.62687	1.98878	1.32084	0.401459	0.3729	0.999241	up	2.59675	3.18433	2.09953	1.45174	2.47745	2.03716
Dnajc5	ENSMUSG00000000826	protein_coding	+	chr2:181520484-181555133	2.26528	1.76633	1.28248	0.358937	0.30445	0.999241	up	2.74921	1.89236	2.15427	1.48203	1.56447	2.25249	13002	2610314I24Rik|AU018536|Csp	MGI:MGI:892995|Ensembl:ENSMUSG00000000826|Vega:OTTMUSG00000016739	2	2 H4|2 103.63 cM	DnaJ heat shock protein family (Hsp40) member C5	mmu04141(Protein processing in endoplasmic reticulum)	GO:0005886(plasma membrane)//GO:0070062(extracellular exosome)//GO:0016020(membrane)//GO:0005765(lysosomal membrane)//GO:0008021(synaptic vesicle)//GO:0005739(mitochondrion)//GO:0043195(terminal bouton)	GO:0043008(ATP-dependent protein binding)//GO:0005515(protein binding)//GO:0001948(glycoprotein binding)	GO:0043524(negative regulation of neuron apoptotic process)
Fmr1	ENSMUSG00000000838	protein_coding	+	chrX:68678484-68717963	6.31223	4.48133	1.40856	0.494221	0.1209	0.999241	up	6.3292	5.8538	6.75369	3.83912	4.23328	5.3716	14265	FMRP|Fmr-1	MGI:MGI:95564|Ensembl:ENSMUSG00000000838|Vega:OTTMUSG00000017748	X	X A7.1|X 34.83 cM	fragile X mental retardation syndrome 1	mmu03013(RNA transport)	GO:0043679(axon terminus)//GO:0043005(neuron projection)//GO:0005845(mRNA cap binding complex)//GO:0098794(postsynapse)//GO:0005654(nucleoplasm)//GO:0005844(polysome)//GO:0097386(glial cell projection)//GO:0044297(cell body)//GO:0032797(SMN complex)//GO:0010494(cytoplasmic stress granule)//GO:1990904(ribonucleoprotein complex)//GO:0005737(cytoplasm)//GO:0016020(membrane)//GO:0019034(viral replica…	GO:1990825(sequence-specific mRNA binding)//GO:0035197(siRNA binding)//GO:0035198(miRNA binding)//GO:0008266(poly(U) RNA binding)//GO:0044325(ion channel binding)//GO:0034046(poly(G) binding)//GO:0008017(microtubule binding)//GO:0002151(G-quadruplex RNA binding)//GO:0003676(nucleic acid binding)//GO:0045502(dynein binding)//GO:0043022(ribosome binding)//GO:0042802(identical protein binding)//GO:0…	GO:2001022(positive regulation of response to DNA damage stimulus)//GO:0060996(dendritic spine development)//GO:0046928(regulation of neurotransmitter secretion)//GO:1902416(positive regulation of mRNA binding)//GO:0043488(regulation of mRNA stability)//GO:1900453(negative regulation of long term synaptic depression)//GO:0045727(positive regulation of translation)//GO:0034644(cellular response to…
Il4	ENSMUSG00000000869	protein_coding	-	chr11:53602981-53618669	0	0	1	0	1	1	up	0	0	0	0	0	0	16189	BSF-1|Il-4	MGI:MGI:96556|Ensembl:ENSMUSG00000000869|Vega:OTTMUSG00000005642	11	11 B1.3|11 31.97 cM	interleukin 4	mmu04060(Cytokine-cytokine receptor interaction)//mmu04151(PI3K-Akt signaling pathway)//mmu04630(Jak-STAT signaling pathway)//mmu04640(Hematopoietic cell lineage)//mmu04660(T cell receptor signaling pathway)//mmu04664(Fc epsilon RI signaling pathway)//mmu04672(Intestinal immune network for IgA production)//mmu05140(Leishmaniasis)//mmu05162(Measles)//mmu05310(Asthma)//mmu05320(Autoimmune thyroid d…	GO:0009897(external side of plasma membrane)//GO:0005576(extracellular region)//GO:0005615(extracellular space)	GO:0008083(growth factor activity)//GO:0005136(interleukin-4 receptor binding)//GO:0005126(cytokine receptor binding)//GO:0005125(cytokine activity)	GO:0002674(negative regulation of acute inflammatory response)//GO:0035745(T-helper 2 cell cytokine production)//GO:0070351(negative regulation of white fat cell proliferation)//GO:0045064(T-helper 2 cell differentiation)//GO:0042104(positive regulation of activated T cell proliferation)//GO:2000424(positive regulation of eosinophil chemotaxis)//GO:0042523(positive regulation of tyrosine phosphor…
Gnb1l	ENSMUSG00000000884	protein_coding	+	chr16:18498767-18566679	0.810777	0.370499	2.18834	1.12984	0.0681	0.991459	up	1.12329	0.939276	0.369766	0.254551	0.365036	0.49191	13972	ESTM55|Gm16314|Me49f07|OTTMUSG00000033458|Wdr14|Wdvcf	MGI:MGI:1338057|Ensembl:ENSMUSG00000000884|Vega:OTTMUSG00000021511	16	16 A3|16 11.46 cM	guanine nucleotide binding protein (G protein), beta polypeptide 1-like		GO:0005737(cytoplasm)	GO:0003674(molecular_function)	GO:0035176(social behavior)
Dbh	ENSMUSG00000000889	protein_coding	+	chr2:27165232-27183200	0	0	1	0	1	1	up	0	0	0	0	0	0	13166	-	MGI:MGI:94864|Ensembl:ENSMUSG00000000889|Vega:OTTMUSG00000011838	2	2 A3|2 19.29 cM	dopamine beta hydroxylase	mmu00350(Tyrosine metabolism)//mmu01100(Metabolic pathways)	GO:0016021(integral component of membrane)//GO:0045177(apical part of cell)//GO:0016020(membrane)//GO:0030425(dendrite)//GO:0030424(axon)//GO:0043196(varicosity)//GO:0045202(synapse)//GO:0005737(cytoplasm)//GO:0031410(cytoplasmic vesicle)//GO:0043195(terminal bouton)//GO:0016023(cytoplasmic, membrane-bounded vesicle)//GO:0043025(neuronal cell body)	GO:0031418(L-ascorbic acid binding)//GO:0004500(dopamine beta-monooxygenase activity)//GO:0005507(copper ion binding)//GO:0016491(oxidoreductase activity)//GO:0004497(monooxygenase activity)//GO:0003824(catalytic activity)//GO:0046872(metal ion binding)//GO:0016715(oxidoreductase activity, acting on paired donors, with incorporation or reduction of molecular oxygen, reduced ascorbate as one donor…	GO:0045907(positive regulation of vasoconstriction)//GO:0008542(visual learning)//GO:0042711(maternal behavior)//GO:0001975(response to amphetamine)//GO:0050900(leukocyte migration)//GO:0007613(memory)//GO:2001236(regulation of extrinsic apoptotic signaling pathway)//GO:0042593(glucose homeostasis)//GO:0007626(locomotory behavior)//GO:0042596(fear response)//GO:0042420(dopamine catabolic process)…
Vpreb3	ENSMUSG00000000903	protein_coding	+	chr10:75943056-75949657	0.215914	0.0478712	4.51032	2.17323	1	1	up	0.407928	0.239814	0	0	0.143614	0	22364	8HS-20|AI528709|Vpreb-3	MGI:MGI:98938|Ensembl:ENSMUSG00000000903|Vega:OTTMUSG00000016465	10	10|10 C	pre-B lymphocyte gene 3		GO:0005783(endoplasmic reticulum)//GO:0005615(extracellular space)	GO:0003674(molecular_function)	GO:0006955(immune response)//GO:0051025(negative regulation of immunoglobulin secretion)//GO:0002377(immunoglobulin production)
Hip1r	ENSMUSG00000000915	protein_coding	+	chr5:123973627-124003211	2.06012	1.75179	1.17601	0.233902	0.5802	0.999241	up	1.8009	2.31178	2.06769	1.81839	1.53518	1.90181	29816	AA410023|mKIAA0655	MGI:MGI:1352504|Ensembl:ENSMUSG00000000915|Vega:OTTMUSG00000035912	5	5|5 F	huntingtin interacting protein 1 related		GO:0030136(clathrin-coated vesicle)//GO:0016020(membrane)//GO:0043231(intracellular membrane-bounded organelle)//GO:0031410(cytoplasmic vesicle)//GO:0005905(clathrin-coated pit)//GO:0005856(cytoskeleton)//GO:0005737(cytoplasm)	GO:0005515(protein binding)//GO:0035091(phosphatidylinositol binding)//GO:0003779(actin binding)//GO:0030276(clathrin binding)//GO:0005543(phospholipid binding)	GO:0006897(endocytosis)//GO:0006915(apoptotic process)//GO:0006898(receptor-mediated endocytosis)//GO:0072583(clathrin-mediated endocytosis)
Hoxa10	ENSMUSG00000000938	protein_coding	-	chr6:52231196-52240854	7.88064	5.85748	1.3454	0.428035	0.06025	0.988711	up	8.55428	8.05341	7.03424	4.28977	6.70103	6.58163	15395	Hox-1.8|Hoxa-10	MGI:MGI:96171|Ensembl:ENSMUSG00000000938|Vega:OTTMUSG00000018886	6	6 B3|6 25.4 cM	homeobox A10	mmu05202(Transcriptional misregulation in cancer)	GO:0005667(transcription factor complex)//GO:0005634(nucleus)//GO:0005737(cytoplasm)	GO:0001077(transcriptional activator activity, RNA polymerase II core promoter proximal region sequence-specific binding)//GO:0043565(sequence-specific DNA binding)//GO:0000978(RNA polymerase II core promoter proximal region sequence-specific DNA binding)//GO:0003677(DNA binding)//GO:0042826(histone deacetylase binding)	GO:0007338(single fertilization)//GO:0030326(embryonic limb morphogenesis)//GO:0008584(male gonad development)//GO:0001501(skeletal system development)//GO:0006351(transcription, DNA-templated)//GO:0007283(spermatogenesis)//GO:0060065(uterus development)//GO:0009952(anterior/posterior pattern specification)//GO:0007275(multicellular organism development)//GO:0010468(regulation of gene expression)…
Hoxa4	ENSMUSG00000000942	protein_coding	-	chr6:52162350-52221854	1.71377	1.30499	1.31324	0.393131	0.49275	0.999241	up	2.35373	1.53015	1.25744	1.06381	1.43883	1.41234	15401	AV206827|Hox-1.4	MGI:MGI:96176|Ensembl:ENSMUSG00000000942|Vega:OTTMUSG00000018878	6	6 B3|6 25.4 cM	homeobox A4		GO:0005634(nucleus)	GO:0043565(sequence-specific DNA binding)//GO:0003677(DNA binding)//GO:0003700(transcription factor activity, sequence-specific DNA binding)	GO:0007275(multicellular organism development)//GO:0009952(anterior/posterior pattern specification)//GO:0006351(transcription, DNA-templated)//GO:0006355(regulation of transcription, DNA-templated)//GO:0048704(embryonic skeletal system morphogenesis)
Snrpn	ENSMUSG00000000948	protein_coding	-	chr7:59982494-60140219	18.5468	18.3765	1.00927	0.0133096	0.9487	0.999241	up	17.8548	18.6303	19.1555	19.0623	20.8305	15.2368	20646	2410045I01Rik|HCERN3|Peg4|Pwcr1|SMN	MGI:MGI:98347|Ensembl:ENSMUSG00000102252|Vega:OTTMUSG00000042349	7	7 C|7 34.04 cM	small nuclear ribonucleoprotein N		GO:0030529(intracellular ribonucleoprotein complex)//GO:0046540(U4/U6 x U5 tri-snRNP complex)//GO:0005682(U5 snRNP)//GO:0005685(U1 snRNP)//GO:0071004(U2-type prespliceosome)//GO:0005687(U4 snRNP)//GO:0005686(U2 snRNP)//GO:0071013(catalytic step 2 spliceosome)//GO:0005634(nucleus)//GO:0005737(cytoplasm)	GO:0003723(RNA binding)	GO:0000398(mRNA splicing, via spliceosome)
Heatr6	ENSMUSG00000000976	protein_coding	+	chr11:83753695-83783754	2.093	1.8174	1.15164	0.203696	0.45735	0.999241	up	2.86142	1.46832	1.94926	1.49795	1.77604	2.17821	217026	2700008B19Rik|BB135312|BB249351	MGI:MGI:1919790|Ensembl:ENSMUSG00000000976|Vega:OTTMUSG00000000978	11	11|11 B5	HEAT repeat containing 6		GO:0005575(cellular_component)	GO:0044822(poly(A) RNA binding)	GO:0008150(biological_process)
Icam4	ENSMUSG00000001014	protein_coding	+	chr9:21015959-21039036	0.426614	0.224241	1.90248	0.927884	1	1	up	0.347231	0.463331	0.469281	0.398634	0.0925752	0.181513	78369	1810015M19Rik|Cd242|ICAM-4	MGI:MGI:1925619|Ensembl:ENSMUSG00000001014	9	9 A3|9 7.69 cM	intercellular adhesion molecule 4, Landsteiner-Wiener blood group		GO:0005886(plasma membrane)//GO:0005887(integral component of plasma membrane)//GO:0005576(extracellular region)//GO:0016020(membrane)//GO:0016021(integral component of membrane)//GO:0005615(extracellular space)//GO:0005737(cytoplasm)	GO:0005178(integrin binding)	GO:0007155(cell adhesion)//GO:0016337(single organismal cell-cell adhesion)
Chtop	ENSMUSG00000001017	protein_coding	-	chr3:90498955-90509498	31.0095	30.3806	1.0207	0.0295578	0.87595	0.999241	up	28.0086	32.3783	32.6415	28.6788	32.6123	29.8507	66511	2500003M10Rik|Fop|Srag	MGI:MGI:1913761|Ensembl:ENSMUSG00000001017|Vega:OTTMUSG00000021869	3	3|3 F2	chromatin target of PRMT1		GO:0005634(nucleus)	GO:0003723(RNA binding)//GO:0005515(protein binding)	GO:0006351(transcription, DNA-templated)//GO:0006355(regulation of transcription, DNA-templated)
Snapin	ENSMUSG00000001018	protein_coding	-	chr3:90476200-90491033	53.8938	48.2295	1.11745	0.160204	0.4651	0.999241	up	58.2279	56.4656	46.9878	47.9531	44.147	52.5883	20615	25kDa|AA407989|AV026596|Bloc1s7|Snap25bp|Snapap	MGI:MGI:1333745|Ensembl:ENSMUSG00000001018|Vega:OTTMUSG00000022106	3	3|3 F1	SNAP-associated protein		GO:0016020(membrane)//GO:0031083(BLOC-1 complex)//GO:0048471(perinuclear region of cytoplasm)//GO:0005794(Golgi apparatus)//GO:0005829(cytosol)//GO:0045202(synapse)//GO:0008021(synaptic vesicle)//GO:0030054(cell junction)//GO:0031410(cytoplasmic vesicle)//GO:0005730(nucleolus)//GO:0005737(cytoplasm)//GO:0030141(secretory granule)	GO:0000149(SNARE binding)//GO:0005515(protein binding)	GO:0007040(lysosome organization)//GO:0016188(synaptic vesicle maturation)//GO:1902774(late endosome to lysosome transport)//GO:0006886(intracellular protein transport)//GO:0017156(calcium ion regulated exocytosis)//GO:0007042(lysosomal lumen acidification)//GO:0016079(synaptic vesicle exocytosis)//GO:0097352(autophagosome maturation)//GO:0048490(anterograde synaptic vesicle transport)//GO:005160…
S100a4	ENSMUSG00000001020	protein_coding	+	chr3:90603769-90606045	10.9744	9.03406	1.21478	0.280692	0.39035	0.999241	up	5.66422	13.8902	13.3687	17.6517	4.96782	4.48269	20198	18A2|42a|Capl|FSp1|Mts1|PeL98|metastasin|pk9a	MGI:MGI:1330282|Ensembl:ENSMUSG00000001020|Vega:OTTMUSG00000022114	3	3 39.27 cM|3 F1-F2	S100 calcium binding protein A4		GO:0043005(neuron projection)//GO:0005634(nucleus)//GO:0005615(extracellular space)//GO:0070062(extracellular exosome)//GO:0048471(perinuclear region of cytoplasm)	GO:0048306(calcium-dependent protein binding)//GO:0003779(actin binding)//GO:0042802(identical protein binding)//GO:0050786(RAGE receptor binding)//GO:0044822(poly(A) RNA binding)//GO:0046872(metal ion binding)//GO:0005515(protein binding)//GO:0005509(calcium ion binding)	GO:0043123(positive regulation of I-kappaB kinase/NF-kappaB signaling)
S100a3	ENSMUSG00000001021	protein_coding	+	chr3:90600214-90602702	0	0	1	0	1	1	up	0	0	0	0	0	0	20197	S100E	MGI:MGI:1338849|Ensembl:ENSMUSG00000001021|Vega:OTTMUSG00000052753	3	3 39.26 cM|3 F1-F2	S100 calcium binding protein A3		GO:0005730(nucleolus)//GO:0005737(cytoplasm)	GO:0008270(zinc ion binding)//GO:0005509(calcium ion binding)//GO:0046872(metal ion binding)
S100a5	ENSMUSG00000001023	protein_coding	+	chr3:90608522-90611780	0.587523	0.252675	2.32521	1.21736	1	1	up	0	0.796582	0.965986	0.51996	0.238065	0	20199	S100D9	MGI:MGI:1338915|Ensembl:ENSMUSG00000001023|Vega:OTTMUSG00000022120	3	3 39.27 cM|3 F1-F2	S100 calcium binding protein A5		GO:0005634(nucleus)//GO:0043025(neuronal cell body)	GO:0005507(copper ion binding)//GO:0008270(zinc ion binding)//GO:0046872(metal ion binding)//GO:0005509(calcium ion binding)//GO:0042803(protein homodimerization activity)	GO:0008150(biological_process)
Scn4a	ENSMUSG00000001027	protein_coding	-	chr11:106349454-106353288	44.2437	38.4181	1.15628	0.209496	0.28745	0.999241	up	47.2558	40.9419	44.5336	21.7433	39.4281	54.0829	110880	Nav1.4|SkM1|mH2	MGI:MGI:98250|Ensembl:ENSMUSG00000001027|Vega:OTTMUSG00000003417	11	11 E1|11 68.91 cM	sodium channel, voltage-gated, type IV, alpha		GO:0016020(membrane)//GO:0005886(plasma membrane)//GO:0016021(integral component of membrane)//GO:0001518(voltage-gated sodium channel complex)	GO:0005272(sodium channel activity)//GO:0005244(voltage-gated ion channel activity)//GO:0005248(voltage-gated sodium channel activity)//GO:0005216(ion channel activity)	GO:0034765(regulation of ion transmembrane transport)//GO:0006812(cation transport)//GO:0006813(potassium ion transport)//GO:0015871(choline transport)//GO:0006814(sodium ion transport)//GO:0055085(transmembrane transport)//GO:0006810(transport)//GO:0019228(neuronal action potential)//GO:0086010(membrane depolarization during action potential)//GO:0006811(ion transport)
Icam2	ENSMUSG00000001029	protein_coding	-	chr11:106377655-106388075	3.24898	1.71546	1.89394	0.92139	0.03295	0.86497	up	3.93662	2.78661	3.02371	1.82344	0.972977	2.34997	15896	CD102|Icam-2|Ly-60	MGI:MGI:96394|Ensembl:ENSMUSG00000001029|Vega:OTTMUSG00000003420	11	11 E1|11 69.09 cM	intercellular adhesion molecule 2	mmu04514(Cell adhesion molecules (CAMs))//mmu04650(Natural killer cell mediated cytotoxicity)	GO:0001931(uropod)//GO:0005887(integral component of plasma membrane)//GO:0016020(membrane)//GO:0071944(cell periphery)//GO:0005886(plasma membrane)//GO:0070062(extracellular exosome)//GO:0016021(integral component of membrane)	GO:0005515(protein binding)//GO:0005178(integrin binding)	GO:0007155(cell adhesion)//GO:0016337(single organismal cell-cell adhesion)
Mapk7	ENSMUSG00000001034	protein_coding	-	chr11:61485430-61494406	1.18766	1.02923	1.15393	0.206557	0.778	0.999241	up	1.47156	0.844801	1.24663	1.08013	0.511854	1.49572	23939	BMK-1|BMK1|ERK-5|ERK5|Erk5-T|PRKM7	MGI:MGI:1346347|Ensembl:ENSMUSG00000001034|Vega:OTTMUSG00000005833	11	11|11 B2	mitogen-activated protein kinase 7	mmu04010(MAPK signaling pathway)//mmu04540(Gap junction)//mmu04722(Neurotrophin signaling pathway)//mmu04912(GnRH signaling pathway)//mmu04921(Oxytocin signaling pathway)//mmu05206(MicroRNAs in cancer)	GO:0005654(nucleoplasm)//GO:0005634(nucleus)//GO:0016605(PML body)//GO:0005737(cytoplasm)//GO:0005829(cytosol)	GO:0051019(mitogen-activated protein kinase binding)//GO:0004674(protein serine/threonine kinase activity)//GO:0004672(protein kinase activity)//GO:0004707(MAP kinase activity)//GO:0000166(nucleotide binding)//GO:0016301(kinase activity)//GO:0005515(protein binding)//GO:0005524(ATP binding)//GO:0016740(transferase activity)	GO:0071363(cellular response to growth factor stimulus)//GO:0045765(regulation of angiogenesis)//GO:0016310(phosphorylation)//GO:0070301(cellular response to hydrogen peroxide)//GO:0043407(negative regulation of MAP kinase activity)//GO:0043066(negative regulation of apoptotic process)//GO:2000352(negative regulation of endothelial cell apoptotic process)//GO:0051247(positive regulation of protei…
B9d1	ENSMUSG00000001039	protein_coding	+	chr11:61505143-61512931	1.9911	1.33789	1.48824	0.573609	0.23515	0.999241	up	0.9312	3.25485	1.78724	1.11152	1.26755	1.63458	27078	AW045994|B9|Eppb9	MGI:MGI:1351471|Ensembl:ENSMUSG00000001039|Vega:OTTMUSG00000005834	11	11|11 B2	B9 protein domain 1		GO:0005929(cilium)//GO:0016020(membrane)//GO:0042995(cell projection)//GO:0035869(ciliary transition zone)//GO:0005813(centrosome)//GO:0036038(MKS complex)//GO:0036064(ciliary basal body)//GO:0005856(cytoskeleton)//GO:0005737(cytoplasm)	GO:0008158(hedgehog receptor activity)//GO:0005515(protein binding)	GO:0060563(neuroepithelial cell differentiation)//GO:0042384(cilium assembly)//GO:0042733(embryonic digit morphogenesis)//GO:0032880(regulation of protein localization)//GO:0030030(cell projection organization)//GO:0001944(vasculature development)//GO:0001701(in utero embryonic development)//GO:0060271(cilium morphogenesis)//GO:0043010(camera-type eye development)//GO:0007224(smoothened signaling…
N4bp3	ENSMUSG00000001053	protein_coding	-	chr11:51289919-52286179	0.616902	0.410352	1.50335	0.58818	1	1	up	0.846275	0.244449	0.759981	0.523306	0.195572	0.512177	212706	C330016O10Rik	MGI:MGI:2442218|Ensembl:ENSMUSG00000001053|Vega:OTTMUSG00000005606	11	11|11 B1.3	NEDD4 binding protein 3		GO:0016020(membrane)//GO:0031410(cytoplasmic vesicle)	GO:0005515(protein binding)	GO:0008150(biological_process)
C1ql4	ENSMUSG00000001076	protein_coding	-	chr15:99084685-99087817	0	0	1	0	1	1	up	0	0	0	0	0	0	239659	C1qtnf11|CTRP11	MGI:MGI:3579909|Ensembl:ENSMUSG00000001076	15	15|15 F1	complement component 1, q subcomponent-like 4		GO:0005581(collagen trimer)//GO:0005576(extracellular region)//GO:0005615(extracellular space)	GO:0005515(protein binding)//GO:0042802(identical protein binding)	GO:0048147(negative regulation of fibroblast proliferation)//GO:0070373(negative regulation of ERK1 and ERK2 cascade)//GO:0045599(negative regulation of fat cell differentiation)
Mfsd10	ENSMUSG00000001082	protein_coding	-	chr5:34633641-34637212	0.811362	0.37668	2.15399	1.10701	0.04355	0.926931	up	0.4669	1.09252	0.874666	0.0438829	0.512608	0.573548	68294	0610009O03Rik|Tetran	MGI:MGI:1915544|Ensembl:ENSMUSG00000001082|Vega:OTTMUSG00000023147	5	5|5 B2	major facilitator superfamily domain containing 10		GO:0016020(membrane)//GO:0016021(integral component of membrane)//GO:0031526(brush border membrane)//GO:0030659(cytoplasmic vesicle membrane)	GO:0008493(tetracycline transporter activity)//GO:0008514(organic anion transmembrane transporter activity)//GO:0005215(transporter activity)	GO:0055085(transmembrane transport)//GO:0006810(transport)//GO:0006915(apoptotic process)//GO:0043252(sodium-independent organic anion transport)//GO:0015904(tetracycline transport)
Luzp1	ENSMUSG00000001089	protein_coding	+	chr4:136469760-136602723	3.49897	2.06228	1.69665	0.762686	0.03675	0.877544	up	4.05311	2.56726	3.87653	2.78861	1.66303	1.73522	269593	2700072H04Rik|AI266952|Luzp|mFLJ00226	MGI:MGI:107629|Ensembl:ENSMUSG00000001089|Vega:OTTMUSG00000009704	4	4 D3|4 68.8 cM	leucine zipper protein 1		GO:0016020(membrane)//GO:0005634(nucleus)//GO:0070062(extracellular exosome)	GO:0003674(molecular_function)	GO:0021503(neural fold bending)//GO:0060840(artery development)//GO:0003281(ventricular septum development)
Slc13a2	ENSMUSG00000001095	protein_coding	-	chr11:78394484-78422217	0	0	1	0	1	1	up	0	0	0	0	0	0	20500	Nadc1|mNaDC-1	MGI:MGI:1276558|Ensembl:ENSMUSG00000001095|Vega:OTTMUSG00000000151	11	11 B5|11 46.74 cM	solute carrier family 13 (sodium-dependent dicarboxylate transporter), member 2		GO:0016020(membrane)//GO:0016021(integral component of membrane)//GO:0005887(integral component of plasma membrane)//GO:0070062(extracellular exosome)	GO:0015361(low-affinity sodium:dicarboxylate symporter activity)//GO:0005215(transporter activity)//GO:0015293(symporter activity)	GO:0006814(sodium ion transport)//GO:0055085(transmembrane transport)//GO:0006810(transport)//GO:0006811(ion transport)
Sebox	ENSMUSG00000001103	protein_coding	+	chr11:78503448-78505081	0.020916	0	inf	inf	1	1	up	0	0	0.062748	0	0	0	18292	OG9|Og9x	MGI:MGI:108012|Ensembl:ENSMUSG00000001103|Vega:OTTMUSG00000000145	11	11 B5|11 46.74 cM	SEBOX homeobox		GO:0005634(nucleus)//GO:0005575(cellular_component)	GO:0003674(molecular_function)//GO:0003677(DNA binding)	GO:0006351(transcription, DNA-templated)//GO:0030154(cell differentiation)//GO:0009792(embryo development ending in birth or egg hatching)//GO:0007275(multicellular organism development)//GO:0048477(oogenesis)//GO:0006355(regulation of transcription, DNA-templated)
Ift20	ENSMUSG00000001105	protein_coding	+	chr11:78536360-78541737	9.34676	9.15169	1.02132	0.0304284	0.92285	0.999241	up	10.8564	8.22879	8.95507	11.2369	9.36083	6.85731	55978	0610009H04Rik|AU015496	MGI:MGI:1915585|Ensembl:ENSMUSG00000001105|Vega:OTTMUSG00000000139	11	11|11 B5	intraflagellar transport 20		GO:1902636(kinociliary basal body)//GO:0005929(cilium)//GO:0044292(dendrite terminus)//GO:0032420(stereocilium)//GO:0030992(intraciliary transport particle B)//GO:0042995(cell projection)//GO:0005794(Golgi apparatus)//GO:0001750(photoreceptor outer segment)//GO:0097546(ciliary base)//GO:0005813(centrosome)//GO:0072372(primary cilium)//GO:0005814(centriole)//GO:0005737(cytoplasm)//GO:0070062(extra…	GO:0005515(protein binding)//GO:0002046(opsin binding)	GO:0090002(establishment of protein localization to plasma membrane)//GO:0035845(photoreceptor cell outer segment organization)//GO:0036372(opsin transport)//GO:0055007(cardiac muscle cell differentiation)//GO:0060828(regulation of canonical Wnt signaling pathway)//GO:0051642(centrosome localization)//GO:0030030(cell projection organization)//GO:0042073(intraciliary transport)//GO:0008542(visual …
Cfp	ENSMUSG00000001128	protein_coding	-	chrX:20797813-20987349	1.91948	1.80033	1.06619	0.0924611	0.9368	0.999241	up	1.39173	2.98262	1.38409	2.24598	1.59212	1.56287	18636	BCFG|Pfc	MGI:MGI:97545|Ensembl:ENSMUSG00000001128|Vega:OTTMUSG00000017182	X	X 16.44 cM|X A3	complement factor properdin	mmu05168(Herpes simplex infection)	GO:0031012(extracellular matrix)//GO:0005576(extracellular region)		GO:0006957(complement activation, alternative pathway)//GO:0002376(immune system process)//GO:0045087(innate immune response)
Timp1	ENSMUSG00000001131	protein_coding	+	chrX:20797813-20987349	0.529032	0.239857	2.20561	1.14118	1	1	up	0.0959083	0.766612	0.724574	0.719572	0	0	21857	Clgi|EPA|TIMP-1|TPA-S1|Timp	MGI:MGI:98752|Ensembl:ENSMUSG00000001131|Vega:OTTMUSG00000017184	X	X A1.3|X 16.38 cM	tissue inhibitor of metalloproteinase 1	mmu04066(HIF-1 signaling pathway)	GO:0005604(basement membrane)//GO:0070062(extracellular exosome)//GO:0005576(extracellular region)//GO:0005578(proteinaceous extracellular matrix)//GO:0031012(extracellular matrix)//GO:0005615(extracellular space)	GO:0008083(growth factor activity)//GO:0005125(cytokine activity)//GO:0030414(peptidase inhibitor activity)//GO:0008191(metalloendopeptidase inhibitor activity)//GO:0002020(protease binding)//GO:0004857(enzyme inhibitor activity)//GO:0046872(metal ion binding)	GO:0008284(positive regulation of cell proliferation)//GO:0043066(negative regulation of apoptotic process)//GO:0010466(negative regulation of peptidase activity)//GO:2001044(regulation of integrin-mediated signaling pathway)//GO:1901164(negative regulation of trophoblast cell migration)//GO:0043086(negative regulation of catalytic activity)//GO:0001775(cell activation)//GO:0009725(response to ho…
Cnnm3	ENSMUSG00000001138	protein_coding	+	chr1:36511866-36528237	0.796568	0.519328	1.53384	0.617151	0.28895	0.999241	up	0.695923	1.1661	0.527676	0.625706	0.236495	0.695783	94218	Acdp3|Clp3|mACDP3	MGI:MGI:2151055|Ensembl:ENSMUSG00000001138|Vega:OTTMUSG00000021763	1	1 B|1 15.3 cM	cyclin M3		GO:0016020(membrane)//GO:0005886(plasma membrane)//GO:0016021(integral component of membrane)	GO:0003674(molecular_function)	GO:0006810(transport)//GO:0008150(biological_process)//GO:0006811(ion transport)
Mcm3ap	ENSMUSG00000001150	protein_coding	+	chr10:76449080-76515856	2.42755	2.25525	1.0764	0.106216	0.65445	0.999241	up	2.6084	1.94233	2.73193	1.8399	2.51929	2.40656	54387	GANP|mKIAA0572	MGI:MGI:1930089|Ensembl:ENSMUSG00000001150	10	10|10 C1	minichromosome maintenance complex component 3 associated protein		GO:0031965(nuclear membrane)//GO:0005634(nucleus)//GO:0005643(nuclear pore)//GO:0005737(cytoplasm)//GO:0005829(cytosol)	GO:0000166(nucleotide binding)	GO:0051028(mRNA transport)//GO:0006810(transport)//GO:0015031(protein transport)//GO:0002376(immune system process)
Oas1h	ENSMUSG00000001168	protein_coding	+	chr5:120861420-120873512	0	0	1	0	1	1	up	0	0	0	0	0	0	246729	-	MGI:MGI:2180853|Ensembl:ENSMUSG00000001168|Vega:OTTMUSG00000026828	5	5 F|5 60.64 cM	2'-5' oligoadenylate synthetase 1H		GO:0005575(cellular_component)	GO:0003725(double-stranded RNA binding)//GO:0001730(2'-5'-oligoadenylate synthetase activity)	GO:0008150(biological_process)
Ocrl	ENSMUSG00000001173	protein_coding	+	chrX:47912386-47965868	8.01204	6.23068	1.2859	0.36278	0.09195	0.999241	up	7.99911	7.77761	8.2594	3.40209	6.56836	8.7216	320634	9530014D17Rik|BB143339|OCRL1	MGI:MGI:109589|Ensembl:ENSMUSG00000001173|Vega:OTTMUSG00000017566	X	X|X A4	oculocerebrorenal syndrome of Lowe	mmu00562(Inositol phosphate metabolism)//mmu01100(Metabolic pathways)//mmu04070(Phosphatidylinositol signaling system)	GO:0030136(clathrin-coated vesicle)//GO:0005768(endosome)//GO:0005886(plasma membrane)//GO:0005634(nucleus)//GO:0005802(trans-Golgi network)//GO:0016020(membrane)//GO:0005794(Golgi apparatus)//GO:0001750(photoreceptor outer segment)//GO:0005929(cilium)//GO:0031410(cytoplasmic vesicle)//GO:0070062(extracellular exosome)//GO:0042995(cell projection)//GO:0005905(clathrin-coated pit)//GO:0005769(earl…	GO:0005096(GTPase activator activity)//GO:0048365(Rac GTPase binding)//GO:0052745(inositol phosphate phosphatase activity)//GO:0016787(hydrolase activity)//GO:0004439(phosphatidylinositol-4,5-bisphosphate 5-phosphatase activity)	GO:0042384(cilium assembly)//GO:0046856(phosphatidylinositol dephosphorylation)//GO:0030030(cell projection organization)//GO:0001701(in utero embryonic development)//GO:0043087(regulation of GTPase activity)//GO:0007165(signal transduction)
Calm1	ENSMUSG00000001175	protein_coding	+	chr12:100199434-100209814	318.281	262.036	1.21465	0.28054	0.44535	0.999241	up	317.634	335.544	301.665	173.437	280.418	332.251	12313	AI256814|AI327027|AI461935|AL024000|CaM|Calm	MGI:MGI:88251|Ensembl:ENSMUSG00000001175|Vega:OTTMUSG00000016979	12	12|12 E	calmodulin 1	mmu04014(Ras signaling pathway)//mmu04015(Rap1 signaling pathway)//mmu04020(Calcium signaling pathway)//mmu04022(cGMP-PKG signaling pathway)//mmu04024(cAMP signaling pathway)//mmu04070(Phosphatidylinositol signaling system)//mmu04114(Oocyte meiosis)//mmu04261(Adrenergic signaling in cardiomyocytes)//mmu04270(Vascular smooth muscle contraction)//mmu04713(Circadian entrainment)//mmu04720(Long-term …	GO:0005886(plasma membrane)//GO:0008076(voltage-gated potassium channel complex)//GO:0043005(neuron projection)//GO:0030426(growth cone)//GO:0005634(nucleus)//GO:0005737(cytoplasm)	GO:0050998(nitric-oxide synthase binding)//GO:0030235(nitric-oxide synthase regulator activity)//GO:0019904(protein domain specific binding)//GO:0031800(type 3 metabotropic glutamate receptor binding)//GO:0030234(enzyme regulator activity)//GO:0047485(protein N-terminus binding)//GO:0044325(ion channel binding)//GO:0043548(phosphatidylinositol 3-kinase binding)//GO:0008179(adenylate cyclase bindi…	GO:0000086(G2/M transition of mitotic cell cycle)//GO:0043388(positive regulation of DNA binding)
Slc26a3	ENSMUSG00000001225	protein_coding	+	chr12:31390870-31473917	0	0	1	0	1	1	up	0	0	0	0	0	0	13487	9030623B18Rik|9130013M11Rik|AV376035|Dra	MGI:MGI:107181|Ensembl:ENSMUSG00000001225|Vega:OTTMUSG00000035459	12	12 A3|12 13.45 cM	solute carrier family 26, member 3	mmu04972(Pancreatic secretion)//mmu04978(Mineral absorption)	GO:0005886(plasma membrane)//GO:0005887(integral component of plasma membrane)//GO:0016020(membrane)//GO:0016021(integral component of membrane)//GO:0031526(brush border membrane)//GO:0016324(apical plasma membrane)//GO:0097225(sperm midpiece)	GO:0019531(oxalate transmembrane transporter activity)//GO:0015106(bicarbonate transmembrane transporter activity)//GO:0005254(chloride channel activity)//GO:0008271(secondary active sulfate transmembrane transporter activity)//GO:0015116(sulfate transmembrane transporter activity)//GO:0015297(antiporter activity)//GO:0015108(chloride transmembrane transporter activity)//GO:0005515(protein bindin…	GO:0015701(bicarbonate transport)//GO:0006821(chloride transport)//GO:0060081(membrane hyperpolarization)//GO:0071320(cellular response to cAMP)//GO:0008272(sulfate transport)//GO:0048240(sperm capacitation)//GO:0055085(transmembrane transport)//GO:0006810(transport)//GO:0051454(intracellular pH elevation)
Hpn	ENSMUSG00000001249	protein_coding	-	chr7:31098724-31115290	1.90811	1.62104	1.17709	0.235221	0.59015	0.999241	up	1.49474	3.2236	1.00599	1.10201	1.71792	2.0432	15451	Hlb320	MGI:MGI:1196620|Ensembl:ENSMUSG00000001249|Vega:OTTMUSG00000036085	7	7|7 B1	hepsin	mmu05203(Viral carcinogenesis)	GO:0005886(plasma membrane)//GO:0005887(integral component of plasma membrane)//GO:0005576(extracellular region)//GO:0009986(cell surface)//GO:0031965(nuclear membrane)//GO:0016020(membrane)//GO:0005789(endoplasmic reticulum membrane)//GO:0016021(integral component of membrane)//GO:0070062(extracellular exosome)//GO:0005911(cell-cell junction)//GO:0043025(neuronal cell body)	GO:0008233(peptidase activity)//GO:0015269(calcium-activated potassium channel activity)//GO:0070008(serine-type exopeptidase activity)//GO:0004252(serine-type endopeptidase activity)//GO:0008236(serine-type peptidase activity)//GO:0016787(hydrolase activity)	GO:0010719(negative regulation of epithelial to mesenchymal transition)//GO:0008360(regulation of cell shape)//GO:0043923(positive regulation by host of viral transcription)//GO:0071805(potassium ion transmembrane transport)//GO:0010628(positive regulation of gene expression)//GO:0034769(basement membrane disassembly)//GO:0010756(positive regulation of plasminogen activation)//GO:0030307(positive…
Gabrg1	ENSMUSG00000001260	protein_coding	-	chr5:70751046-70842617	0.0660676	0.0317186	2.08292	1.05861	1	1	up	0.0291558	0.1051	0.0639467	0.0168523	0.0473122	0.0309914	14405	GabaA|GabaA/BZ	MGI:MGI:103156|Ensembl:ENSMUSG00000001260|Vega:OTTMUSG00000054188	5	5 C3.1|5 37.43 cM	gamma-aminobutyric acid (GABA) A receptor, subunit gamma 1	mmu04080(Neuroactive ligand-receptor interaction)//mmu04723(Retrograde endocannabinoid signaling)//mmu04727(GABAergic synapse)//mmu05032(Morphine addiction)//mmu05033(Nicotine addiction)	GO:0005886(plasma membrane)//GO:1902711(GABA-A receptor complex)//GO:0043235(receptor complex)//GO:0016020(membrane)//GO:0016021(integral component of membrane)//GO:0045202(synapse)//GO:0030054(cell junction)//GO:0034707(chloride channel complex)//GO:0045211(postsynaptic membrane)	GO:0004890(GABA-A receptor activity)//GO:0005254(chloride channel activity)//GO:0050811(GABA receptor binding)//GO:0005230(extracellular ligand-gated ion channel activity)	GO:0006810(transport)//GO:0006821(chloride transport)//GO:0007214(gamma-aminobutyric acid signaling pathway)//GO:0007268(chemical synaptic transmission)//GO:0006811(ion transport)
Sp1	ENSMUSG00000001280	protein_coding	+	chr15:102406142-102436404	4.03579	2.82215	1.43004	0.516056	0.05425	0.963165	up	5.55486	3.24725	3.30527	2.39214	2.711	3.36332	20683	1110003E12Rik|AA450830|AI845540|Sp1-1	MGI:MGI:98372|Ensembl:ENSMUSG00000001280|Vega:OTTMUSG00000035159	15	15|15 F3	trans-acting transcription factor 1	mmu04350(TGF-beta signaling pathway)//mmu04915(Estrogen signaling pathway)//mmu05016(Huntington's disease)//mmu05202(Transcriptional misregulation in cancer)//mmu05231(Choline metabolism in cancer)	GO:0032993(protein-DNA complex)//GO:0005654(nucleoplasm)//GO:0005634(nucleus)//GO:0005737(cytoplasm)//GO:0000790(nuclear chromatin)	GO:0042826(histone deacetylase binding)//GO:0003700(transcription factor activity, sequence-specific DNA binding)//GO:0000978(RNA polymerase II core promoter proximal region sequence-specific DNA binding)//GO:0008134(transcription factor binding)//GO:0001046(core promoter sequence-specific DNA binding)//GO:0003676(nucleic acid binding)//GO:0035035(histone acetyltransferase binding)//GO:0000987(co…	GO:0048596(embryonic camera-type eye morphogenesis)//GO:0048511(rhythmic process)//GO:0001892(embryonic placenta development)//GO:0048706(embryonic skeletal system development)//GO:0030219(megakaryocyte differentiation)//GO:0045893(positive regulation of transcription, DNA-templated)//GO:0042789(mRNA transcription from RNA polymerase II promoter)//GO:0060216(definitive hemopoiesis)//GO:0043923(po…
Itgb7	ENSMUSG00000001281	protein_coding	-	chr15:102215994-102231935	0.141408	0.0854303	1.65524	0.727039	1	1	up	0.106323	0.143416	0.174483	0.0306925	0	0.225599	16421	Ly69	MGI:MGI:96616|Ensembl:ENSMUSG00000001281|Vega:OTTMUSG00000030863	15	15 F3|15 57.39 cM	integrin beta 7	mmu04151(PI3K-Akt signaling pathway)//mmu04510(Focal adhesion)//mmu04512(ECM-receptor interaction)//mmu04514(Cell adhesion molecules (CAMs))//mmu04672(Intestinal immune network for IgA production)//mmu04810(Regulation of actin cytoskeleton)//mmu05202(Transcriptional misregulation in cancer)//mmu05410(Hypertrophic cardiomyopathy (HCM))//mmu05412(Arrhythmogenic right ventricular cardiomyopathy (ARV…	GO:0016021(integral component of membrane)//GO:0070062(extracellular exosome)//GO:0009986(cell surface)//GO:0043235(receptor complex)//GO:0016020(membrane)//GO:0008305(integrin complex)//GO:0034669(integrin alpha4-beta7 complex)	GO:0004872(receptor activity)//GO:0050839(cell adhesion molecule binding)	GO:0043113(receptor clustering)//GO:0007155(cell adhesion)//GO:0034113(heterotypic cell-cell adhesion)//GO:0050901(leukocyte tethering or rolling)//GO:0007229(integrin-mediated signaling pathway)//GO:0003366(cell-matrix adhesion involved in ameboidal cell migration)//GO:0072678(T cell migration)//GO:0034446(substrate adhesion-dependent cell spreading)//GO:0050900(leukocyte migration)//GO:0007160(…
Efnb2	ENSMUSG00000001300	protein_coding	-	chr8:8617433-8660773	1.87181	1.79882	1.04058	0.0573834	0.8192	0.999241	up	1.96793	1.77299	1.87451	1.8458	1.13393	2.41673	13642	ELF-2|Epl5|Eplg5|Htk-L|LERK-5|Lerk5|NLERK-1	MGI:MGI:105097|Ensembl:ENSMUSG00000001300|Vega:OTTMUSG00000022160	8	8 A1.1|8 3.42 cM	ephrin B2	mmu04360(Axon guidance)	GO:0016020(membrane)//GO:0005886(plasma membrane)//GO:0016021(integral component of membrane)//GO:0005925(focal adhesion)	GO:0005102(receptor binding)//GO:0046875(ephrin receptor binding)//GO:0005515(protein binding)	GO:0007411(axon guidance)//GO:0048013(ephrin receptor signaling pathway)//GO:0009887(organ morphogenesis)//GO:1903849(positive regulation of aorta morphogenesis)//GO:2000727(positive regulation of cardiac muscle cell differentiation)//GO:0007155(cell adhesion)//GO:0016477(cell migration)//GO:0030154(cell differentiation)//GO:0010839(negative regulation of keratinocyte proliferation)//GO:0050920(r…
Srr	ENSMUSG00000001323	protein_coding	-	chr11:74898070-75164507	6.02611	5.04095	1.19543	0.257532	0.53445	0.999241	up	6.40724	6.46886	5.20223	4.77905	4.70526	5.63854	27364	M100034|Rgsc34|Srs	MGI:MGI:1351636|Ensembl:ENSMUSG00000001323|Vega:OTTMUSG00000006189	11	11|11 B4	serine racemase	mmu00260(Glycine, serine and threonine metabolism)	GO:0005886(plasma membrane)//GO:0045177(apical part of cell)//GO:0005737(cytoplasm)//GO:0043025(neuronal cell body)	GO:0016853(isomerase activity)//GO:0030170(pyridoxal phosphate binding)//GO:0003941(L-serine ammonia-lyase activity)//GO:0018114(threonine racemase activity)//GO:0005524(ATP binding)//GO:0030165(PDZ domain binding)//GO:0016594(glycine binding)//GO:0000287(magnesium ion binding)//GO:0016829(lyase activity)//GO:0000166(nucleotide binding)//GO:0030378(serine racemase activity)//GO:0003824(catalytic …	GO:0008152(metabolic process)//GO:0070178(D-serine metabolic process)//GO:0051289(protein homotetramerization)//GO:0007420(brain development)//GO:0042866(pyruvate biosynthetic process)//GO:0009069(serine family amino acid metabolic process)//GO:0006520(cellular amino acid metabolic process)//GO:0006563(L-serine metabolic process)//GO:0070179(D-serine biosynthetic process)
Sync	ENSMUSG00000001333	protein_coding	+	chr4:129287616-129335370	9.04614	7.2872	1.24137	0.311938	0.41295	0.999241	up	10.398	8.61517	8.12524	6.30376	7.20233	8.35551	68828	1110057H03Rik|SNIP4	MGI:MGI:1916078|Ensembl:ENSMUSG00000001333|Vega:OTTMUSG00000009627	4	4 D2.2|4 63.26 cM	syncoilin		GO:0030018(Z disc)//GO:0005829(cytosol)//GO:0005882(intermediate filament)//GO:0042383(sarcolemma)//GO:0031594(neuromuscular junction)//GO:0005737(cytoplasm)	GO:0005198(structural molecule activity)//GO:0005515(protein binding)	GO:0045103(intermediate filament-based process)
Ccdc132	ENSMUSG00000001376	protein_coding	+	chr6:3498381-3603319	14.8976	13.7904	1.08029	0.111423	0.59145	0.999241	up	15.748	16.0423	12.9026	11.7479	13.3135	16.3097
Hars	ENSMUSG00000001380	protein_coding	-	chr18:36766529-36792562	10.701	10.2346	1.04557	0.0642929	0.80075	0.999241	up	9.75504	12.2528	10.0953	11.0014	10.1938	9.50868	15115	MMHRS	MGI:MGI:108087|Ensembl:ENSMUSG00000001380	18	18|18 B2	histidyl-tRNA synthetase	mmu00970(Aminoacyl-tRNA biosynthesis)	GO:0005739(mitochondrion)//GO:0005737(cytoplasm)	GO:0005524(ATP binding)//GO:0000166(nucleotide binding)//GO:0004821(histidine-tRNA ligase activity)//GO:0016874(ligase activity)//GO:0004812(aminoacyl-tRNA ligase activity)	GO:0006412(translation)//GO:0032543(mitochondrial translation)//GO:0006427(histidyl-tRNA aminoacylation)//GO:0006418(tRNA aminoacylation for protein translation)
Zmat2	ENSMUSG00000001383	protein_coding	+	chr18:36793922-36799660	28.5862	26.9929	1.05903	0.082742	0.6659	0.999241	up	26.8902	31.6683	27.2003	26.0085	27.1061	27.864	66492	2610510D14Rik|2900082I05Rik	MGI:MGI:1913742|Ensembl:ENSMUSG00000001383	18	18|18 B2	zinc finger, matrin type 2	mmu03040(Spliceosome)	GO:0046540(U4/U6 x U5 tri-snRNP complex)//GO:0005634(nucleus)	GO:0003723(RNA binding)//GO:0003676(nucleic acid binding)//GO:0008270(zinc ion binding)//GO:0003677(DNA binding)//GO:0046872(metal ion binding)	GO:0000398(mRNA splicing, via spliceosome)
Rhbg	ENSMUSG00000001417	protein_coding	-	chr3:88242873-88296999	0.0458203	3.00167e-35	1.52665e+33	110.234	1	1	up	0	1.0741e-08	0.137461	1.32412e-46	9.005e-35	0	58176	-	MGI:MGI:1927379|Ensembl:ENSMUSG00000103766|Ensembl:ENSMUSG00000104445|Vega:OTTMUSG00000035936|Vega:OTTMUSG00000052140	3	3 F1|3 38.78 cM	Rhesus blood group-associated B glycoprotein		GO:0005886(plasma membrane)//GO:0005887(integral component of plasma membrane)//GO:0016020(membrane)//GO:0016021(integral component of membrane)//GO:0016323(basolateral plasma membrane)//GO:0014731(spectrin-associated cytoskeleton)//GO:0031410(cytoplasmic vesicle)//GO:0046658(anchored component of plasma membrane)	GO:0008519(ammonium transmembrane transporter activity)//GO:0030506(ankyrin binding)	GO:0015696(ammonium transport)//GO:0072488(ammonium transmembrane transport)//GO:0015695(organic cation transport)//GO:0019740(nitrogen utilization)//GO:0006810(transport)//GO:0070634(transepithelial ammonium transport)
Mef2d	ENSMUSG00000001419	protein_coding	+	chr3:88142371-88177785	24.8454	23.7399	1.04657	0.065666	0.7721	0.999241	up	27.4474	24.3468	22.7419	21.87	21.3435	28.0061	17261	C80750	MGI:MGI:99533|Ensembl:ENSMUSG00000001419|Vega:OTTMUSG00000027132	3	3 F1|3 38.78 cM	myocyte enhancer factor 2D	mmu04022(cGMP-PKG signaling pathway)	GO:0005654(nucleoplasm)//GO:0043231(intracellular membrane-bounded organelle)//GO:0005634(nucleus)//GO:0005737(cytoplasm)	GO:0042826(histone deacetylase binding)//GO:0003700(transcription factor activity, sequence-specific DNA binding)//GO:0000981(RNA polymerase II transcription factor activity, sequence-specific DNA binding)//GO:0019899(enzyme binding)//GO:0000978(RNA polymerase II core promoter proximal region sequence-specific DNA binding)//GO:0000977(RNA polymerase II regulatory region sequence-specific DNA bind…	GO:0002062(chondrocyte differentiation)//GO:0001958(endochondral ossification)//GO:0006351(transcription, DNA-templated)//GO:0030154(cell differentiation)//GO:0001649(osteoblast differentiation)//GO:0007275(multicellular organism development)//GO:0045944(positive regulation of transcription from RNA polymerase II promoter)//GO:0007399(nervous system development)//GO:0006915(apoptotic process)//GO…
Tmem79	ENSMUSG00000001420	protein_coding	-	chr3:88325022-88334504	0.166011	0.0652866	2.5428	1.34642	1	1	up	0.175685	0.283992	0.0383564	0.121577	0	0.0742832	71913	2310042N02Rik|2310074C17Rik|Matt|ma	MGI:MGI:1919163|Ensembl:ENSMUSG00000001420|Vega:OTTMUSG00000022067	3	3|3 F1	transmembrane protein 79		GO:0005764(lysosome)//GO:0016020(membrane)//GO:0005794(Golgi apparatus)//GO:0016021(integral component of membrane)//GO:0005765(lysosomal membrane)//GO:0032588(trans-Golgi network membrane)//GO:0005737(cytoplasm)	GO:0003674(molecular_function)	GO:0002070(epithelial cell maturation)//GO:0031069(hair follicle morphogenesis)//GO:0070268(cornification)//GO:0061436(establishment of skin barrier)//GO:0045684(positive regulation of epidermis development)//GO:0045055(regulated exocytosis)//GO:0042335(cuticle development)
Col18a1	ENSMUSG00000001435	protein_coding	-	chr10:77032240-77166548	0.866679	0.849174	1.02061	0.0294371	0.94645	0.999241	up	0.875431	0.741664	0.982942	0.776937	0.894121	0.876465	12822	-	MGI:MGI:88451|Ensembl:ENSMUSG00000001435|Vega:OTTMUSG00000021408	10	10 B5-C1|10 39.72 cM	collagen, type XVIII, alpha 1	mmu04974(Protein digestion and absorption)	GO:0005604(basement membrane)//GO:0070062(extracellular exosome)//GO:0005576(extracellular region)//GO:0005581(collagen trimer)//GO:0005578(proteinaceous extracellular matrix)//GO:0031012(extracellular matrix)//GO:0005615(extracellular space)	GO:0005198(structural molecule activity)//GO:0046872(metal ion binding)	GO:0008284(positive regulation of cell proliferation)//GO:2000353(positive regulation of endothelial cell apoptotic process)//GO:0030198(extracellular matrix organization)//GO:0001886(endothelial cell morphogenesis)//GO:0007155(cell adhesion)//GO:0030335(positive regulation of cell migration)//GO:0001525(angiogenesis)
Slc19a1	ENSMUSG00000001436	protein_coding	+	chr10:77032240-77166548	1.20522	0.523681	2.30145	1.20254	0.14075	0.999241	up	1.88608	1.43741	0.292171	0.453426	0.535284	0.582333	20509	AI323572|RFC|RFC-1|RFC1	MGI:MGI:103182|Ensembl:ENSMUSG00000001436|Vega:OTTMUSG00000033598	10	10 C1|10 39.72 cM	solute carrier family 19 (folate transporter), member 1	mmu04977(Vitamin digestion and absorption)	GO:0005886(plasma membrane)//GO:0005887(integral component of plasma membrane)//GO:0016020(membrane)//GO:0016021(integral component of membrane)//GO:0016323(basolateral plasma membrane)//GO:0031526(brush border membrane)//GO:0016324(apical plasma membrane)	GO:0008517(folic acid transporter activity)//GO:0008518(reduced folate carrier activity)//GO:0005542(folic acid binding)//GO:0015350(methotrexate transporter activity)	GO:0015884(folic acid transport)//GO:0006810(transport)//GO:0098838(reduced folate transmembrane transport)//GO:0051958(methotrexate transport)
Kpnb1	ENSMUSG00000001440	protein_coding	-	chr11:97159713-97187881	17.7542	15.2687	1.16278	0.217579	0.49145	0.999241	up	16.0069	20.4036	16.8521	13.934	17.6422	14.2301	16211	AA409963|IPOB|Impnb	MGI:MGI:107532|Ensembl:ENSMUSG00000001440|Vega:OTTMUSG00000002303	11	11|11 D	karyopherin (importin) beta 1	mmu03013(RNA transport)	GO:0070062(extracellular exosome)//GO:0034399(nuclear periphery)//GO:0005635(nuclear envelope)//GO:0031965(nuclear membrane)//GO:0016020(membrane)//GO:0043234(protein complex)//GO:0005643(nuclear pore)//GO:0071782(endoplasmic reticulum tubular network)//GO:0005654(nucleoplasm)//GO:0005634(nucleus)//GO:0005737(cytoplasm)	GO:0019894(kinesin binding)//GO:0032403(protein complex binding)//GO:0019899(enzyme binding)//GO:0051879(Hsp90 protein binding)//GO:0019904(protein domain specific binding)//GO:0044822(poly(A) RNA binding)//GO:0008139(nuclear localization sequence binding)//GO:0005515(protein binding)//GO:0008565(protein transporter activity)//GO:0008536(Ran GTPase binding)	GO:0007080(mitotic metaphase plate congression)//GO:0000060(protein import into nucleus, translocation)//GO:0006606(protein import into nucleus)//GO:0090307(mitotic spindle assembly)//GO:0015031(protein transport)//GO:0045184(establishment of protein localization)//GO:0007079(mitotic chromosome movement towards spindle pole)//GO:0031291(Ran protein signal transduction)//GO:0040001(establishment o…
Npepps	ENSMUSG00000001441	protein_coding	-	chr11:97205841-97282897	16.5465	14.7887	1.11887	0.162036	0.37095	0.999241	up	16.2929	17.0778	16.2688	14.7389	16.3473	13.2798	19155	AAP-S|MP100|Psa|R74825|goku	MGI:MGI:1101358|Ensembl:ENSMUSG00000001441|Vega:OTTMUSG00000002302	11	11 D|11 60.95 cM	aminopeptidase puromycin sensitive		GO:0005886(plasma membrane)//GO:0005634(nucleus)//GO:0005737(cytoplasm)//GO:0070062(extracellular exosome)	GO:0008237(metallopeptidase activity)//GO:0008233(peptidase activity)//GO:0004177(aminopeptidase activity)//GO:0070006(metalloaminopeptidase activity)//GO:0008270(zinc ion binding)//GO:0046872(metal ion binding)//GO:0042277(peptide binding)//GO:0016787(hydrolase activity)	GO:0006508(proteolysis)//GO:0043171(peptide catabolic process)//GO:0071456(cellular response to hypoxia)//GO:1903955(positive regulation of protein targeting to mitochondrion)
Tbx21	ENSMUSG00000001444	protein_coding	-	chr11:97098070-97115331	0.138544	0.124262	1.11493	0.156957	1	1	up	0.28675	0.12888	0	0.0662078	0.154671	0.151906	57765	TBT1|Tbet|Tblym	MGI:MGI:1888984|Ensembl:ENSMUSG00000001444|Vega:OTTMUSG00000002233	11	11|11 D	T-box 21	mmu05321(Inflammatory bowel disease (IBD))	GO:0005634(nucleus)//GO:0043025(neuronal cell body)	GO:0044212(transcription regulatory region DNA binding)//GO:0005515(protein binding)//GO:0003677(DNA binding)//GO:0003700(transcription factor activity, sequence-specific DNA binding)	GO:0071310(cellular response to organic substance)//GO:0072676(lymphocyte migration)//GO:0006351(transcription, DNA-templated)//GO:0048304(positive regulation of isotype switching to IgG isotypes)//GO:0050776(regulation of immune response)//GO:0030217(T cell differentiation)//GO:0006355(regulation of transcription, DNA-templated)//GO:0045893(positive regulation of transcription, DNA-templated)
Mrpl10	ENSMUSG00000001445	protein_coding	+	chr11:97041559-97068904	12.1711	10.7537	1.1318	0.178619	0.39385	0.999241	up	12.0334	13.1315	11.3483	11.2071	11.2405	9.8136	107732	0610040E02Rik|C78440|MRP-L8|Rpml8	MGI:MGI:1333801|Ensembl:ENSMUSG00000001445|Vega:OTTMUSG00000002231	11	11|11 D	mitochondrial ribosomal protein L10	mmu03010(Ribosome)	GO:0030529(intracellular ribonucleoprotein complex)//GO:0005654(nucleoplasm)//GO:0005739(mitochondrion)//GO:0005840(ribosome)//GO:0005762(mitochondrial large ribosomal subunit)	GO:0044822(poly(A) RNA binding)//GO:0003735(structural constituent of ribosome)	GO:0042254(ribosome biogenesis)
Cyp51	ENSMUSG00000001467	protein_coding	-	chr5:4081144-4104746	1.60046	1.28504	1.24546	0.316681	0.24605	0.999241	up	1.58439	1.71514	1.50186	1.62482	1.05826	1.17202	13121	AI426508|CYPLI|Cyp51a1|Ldm|P450-14DM|P450LI	MGI:MGI:106040|Ensembl:ENSMUSG00000001467|Vega:OTTMUSG00000022725	5	5 2.3 cM|5 A2	cytochrome P450, family 51	mmu00100(Steroid biosynthesis)//mmu01100(Metabolic pathways)	GO:0005783(endoplasmic reticulum)//GO:0016020(membrane)//GO:0005886(plasma membrane)//GO:0016021(integral component of membrane)//GO:0043231(intracellular membrane-bounded organelle)	GO:0005506(iron ion binding)//GO:0016705(oxidoreductase activity, acting on paired donors, with incorporation or reduction of molecular oxygen)//GO:0020037(heme binding)//GO:0016491(oxidoreductase activity)//GO:0004497(monooxygenase activity)//GO:0008398(sterol 14-demethylase activity)//GO:0046872(metal ion binding)	GO:0055114(oxidation-reduction process)//GO:0033488(cholesterol biosynthetic process via 24,25-dihydrolanosterol)//GO:0006695(cholesterol biosynthetic process)//GO:0008203(cholesterol metabolic process)//GO:0016126(sterol biosynthetic process)//GO:0006629(lipid metabolic process)//GO:0006694(steroid biosynthetic process)//GO:0008202(steroid metabolic process)
Tcf25	ENSMUSG00000001472	protein_coding	+	chr8:119910359-124345724	30.8353	28.065	1.09871	0.135807	0.8745	0.999241	up	29.1549	32.0589	31.2919	22.2944	30.6277	31.273	66855	1100001J13Rik|1810041K11Rik|D8Ertd325e|Nulp1|mKIAA1049	MGI:MGI:1914105|Ensembl:ENSMUSG00000001472	8	8 E1|8 72.1 cM	transcription factor 25 (basic helix-loop-helix)		GO:0005634(nucleus)	GO:0003677(DNA binding)//GO:0003700(transcription factor activity, sequence-specific DNA binding)	GO:0006351(transcription, DNA-templated)//GO:0006355(regulation of transcription, DNA-templated)//GO:0000122(negative regulation of transcription from RNA polymerase II promoter)
Def8	ENSMUSG00000001482	protein_coding	+	chr8:119910359-124345724	5.26638	5.0158	1.04996	0.0703298	0.9492	0.999241	up	5.17355	4.72019	5.90539	4.86176	5.2052	4.98045	23854	AI449518|D8Ertd713e|DEF-8	MGI:MGI:1346331|Ensembl:ENSMUSG00000001482|Vega:OTTMUSG00000022172	8	8 E1|8 72.1 cM	differentially expressed in FDCP 8		GO:0005575(cellular_component)	GO:0003674(molecular_function)//GO:0046872(metal ion binding)	GO:0035556(intracellular signal transduction)//GO:0008150(biological_process)
Meox1	ENSMUSG00000001493	protein_coding	-	chr11:101877509-101894374	0.80551	0.635213	1.2681	0.342663	0.4001	0.999241	up	0.773372	0.868427	0.77473	0.632198	0.625286	0.648153	17285	AI385561|D330041M02Rik|Mox-1|Mox1	MGI:MGI:103220|Ensembl:ENSMUSG00000001493|Vega:OTTMUSG00000002088	11	11 D|11 65.48 cM	mesenchyme homeobox 1		GO:0005634(nucleus)//GO:0005737(cytoplasm)	GO:0003682(chromatin binding)//GO:0003700(transcription factor activity, sequence-specific DNA binding)//GO:0043565(sequence-specific DNA binding)//GO:0000978(RNA polymerase II core promoter proximal region sequence-specific DNA binding)//GO:0071837(HMG box domain binding)//GO:0001077(transcriptional activator activity, RNA polymerase II core promoter proximal region sequence-specific binding)//G…	GO:0001757(somite specification)//GO:0061053(somite development)//GO:0006351(transcription, DNA-templated)//GO:0061056(sclerotome development)//GO:0007275(multicellular organism development)//GO:0045944(positive regulation of transcription from RNA polymerase II promoter)//GO:0006355(regulation of transcription, DNA-templated)
Sost	ENSMUSG00000001494	protein_coding	-	chr11:101962457-101967015	0	0	1	0	1	1	up	0	0	0	0	0	0	74499	5430411E23Rik	MGI:MGI:1921749|Ensembl:ENSMUSG00000001494|Vega:OTTMUSG00000002135	11	11|11 D	sclerostin	mmu04310(Wnt signaling pathway)	GO:0005576(extracellular region)//GO:0043234(protein complex)//GO:0005794(Golgi apparatus)//GO:0005578(proteinaceous extracellular matrix)//GO:0031012(extracellular matrix)//GO:0005615(extracellular space)	GO:0008201(heparin binding)//GO:0008134(transcription factor binding)//GO:0005515(protein binding)	GO:0030514(negative regulation of BMP signaling pathway)//GO:0030178(negative regulation of Wnt signaling pathway)//GO:0090090(negative regulation of canonical Wnt signaling pathway)//GO:2000054(negative regulation of Wnt signaling pathway involved in dorsal/ventral axis specification)//GO:0016055(Wnt signaling pathway)//GO:0071374(cellular response to parathyroid hormone stimulus)//GO:0001503(os…
Nkx2-1	ENSMUSG00000001496	protein_coding	-	chr12:56531957-56607476	0	0	1	0	1	1	up	0	0	0	0	0	0	21869	AV026640|Nkx2.1|T/EBP|Titf1|Ttf-1	MGI:MGI:108067|Ensembl:ENSMUSG00000001496|Vega:OTTMUSG00000044396	12	12 24.42 cM|12 C1-C3	NK2 homeobox 1		GO:0005654(nucleoplasm)//GO:0005667(transcription factor complex)//GO:0005634(nucleus)	GO:0001161(intronic transcription regulatory region sequence-specific DNA binding)//GO:0019899(enzyme binding)//GO:0003700(transcription factor activity, sequence-specific DNA binding)//GO:0043565(sequence-specific DNA binding)//GO:0001047(core promoter binding)//GO:0001012(RNA polymerase II regulatory region DNA binding)//GO:0000977(RNA polymerase II regulatory region sequence-specific DNA bindi…	GO:0006644(phospholipid metabolic process)//GO:0060486(Clara cell differentiation)//GO:0021795(cerebral cortex cell migration)//GO:0048663(neuron fate commitment)//GO:0010719(negative regulation of epithelial to mesenchymal transition)//GO:0010628(positive regulation of gene expression)//GO:0048709(oligodendrocyte differentiation)//GO:0030512(negative regulation of transforming growth factor beta…
Irx2	ENSMUSG00000001504	protein_coding	+	chr13:72628819-72634196	0.156036	0.0410747	3.79884	1.92556	1	1	up	0.468109	0	0	0.093954	0.0292701	0	16372	-	MGI:MGI:1197526|Ensembl:ENSMUSG00000001504|Vega:OTTMUSG00000036811	13	13 C1|13 39.23 cM	Iroquois related homeobox 2 (Drosophila)		GO:0005634(nucleus)	GO:0043565(sequence-specific DNA binding)//GO:0003677(DNA binding)	GO:0006355(regulation of transcription, DNA-templated)
Col1a1	ENSMUSG00000001506	protein_coding	+	chr11:94936223-94953042	6.21729	3.86668	1.60791	0.68519	0.0008	0.111974	up	5.02816	7.77364	5.85007	4.70807	3.14442	3.74755	12842	Col1a-1|Cola-1|Cola1|Mov-13|Mov13	MGI:MGI:88467|Ensembl:ENSMUSG00000001506|Vega:OTTMUSG00000002059	11	11 59.01 cM|11 D	collagen, type I, alpha 1	mmu04151(PI3K-Akt signaling pathway)//mmu04510(Focal adhesion)//mmu04512(ECM-receptor interaction)//mmu04611(Platelet activation)//mmu04933(AGE-RAGE signaling pathway in diabetic complications)//mmu04974(Protein digestion and absorption)//mmu05146(Amoebiasis)//mmu05205(Proteoglycans in cancer)	GO:0005576(extracellular region)//GO:0005584(collagen type I trimer)//GO:0005581(collagen trimer)//GO:0005794(Golgi apparatus)//GO:0005783(endoplasmic reticulum)//GO:0005578(proteinaceous extracellular matrix)//GO:0031012(extracellular matrix)//GO:0005615(extracellular space)//GO:0005737(cytoplasm)//GO:0030141(secretory granule)	GO:0005201(extracellular matrix structural constituent)//GO:0046872(metal ion binding)//GO:0005515(protein binding)//GO:0042802(identical protein binding)//GO:0048407(platelet-derived growth factor binding)	GO:0071230(cellular response to amino acid stimulus)//GO:0034505(tooth mineralization)//GO:0045893(positive regulation of transcription, DNA-templated)//GO:0060351(cartilage development involved in endochondral bone morphogenesis)//GO:0048706(embryonic skeletal system development)//GO:0042060(wound healing)//GO:0070208(protein heterotrimerization)//GO:0032964(collagen biosynthetic process)//GO:00…
Dlx3	ENSMUSG00000001510	protein_coding	+	chr11:95120088-95125296	0	0	1	0	1	1	up	0	0	0	0	0	0	13393	AV237891|Dlx-3	MGI:MGI:94903|Ensembl:ENSMUSG00000001510|Vega:OTTMUSG00000001614	11	11 D|11 59.01 cM	distal-less homeobox 3		GO:0005634(nucleus)	GO:0001077(transcriptional activator activity, RNA polymerase II core promoter proximal region sequence-specific binding)//GO:0043565(sequence-specific DNA binding)//GO:0003682(chromatin binding)//GO:0003677(DNA binding)	GO:0071895(odontoblast differentiation)//GO:0042475(odontogenesis of dentin-containing tooth)//GO:0001568(blood vessel development)//GO:0007275(multicellular organism development)//GO:0001890(placenta development)//GO:0006355(regulation of transcription, DNA-templated)
Foxm1	ENSMUSG00000001517	protein_coding	+	chr6:128362966-128408932	0.0354056	0.0224535	1.57684	0.657036	1	1	up	0.0563275	0.0498892	0	0	0	0.0673605	14235	AA408308|AW554517|BB238854|Fkh16|Foxm1b|HFH-11B|MPHOSPH2|Mpm2|WIN	MGI:MGI:1347487|Ensembl:ENSMUSG00000001517|Vega:OTTMUSG00000023770	6	6 F3|6 62.98 cM	forkhead box M1		GO:0005654(nucleoplasm)//GO:0005634(nucleus)//GO:0005737(cytoplasm)	GO:0003700(transcription factor activity, sequence-specific DNA binding)//GO:0019901(protein kinase binding)//GO:0000981(RNA polymerase II transcription factor activity, sequence-specific DNA binding)//GO:0044212(transcription regulatory region DNA binding)//GO:0043565(sequence-specific DNA binding)//GO:0005515(protein binding)//GO:0003677(DNA binding)	GO:0008284(positive regulation of cell proliferation)//GO:0032873(negative regulation of stress-activated MAPK cascade)//GO:0071156(regulation of cell cycle arrest)//GO:2000781(positive regulation of double-strand break repair)//GO:0006974(cellular response to DNA damage stimulus)//GO:0000086(G2/M transition of mitotic cell cycle)//GO:0001889(liver development)//GO:0006351(transcription, DNA-temp…
Itfg2	ENSMUSG00000001518	protein_coding	-	chr6:128409443-128424931	2.86945	2.6158	1.09697	0.133522	0.6106	0.999241	up	3.0574	2.95208	2.59887	2.42301	1.84891	3.57547	101142	2700050P07Rik|AI646725	MGI:MGI:1915450|Ensembl:ENSMUSG00000001518|Vega:OTTMUSG00000023984	6	6|6 F3	integrin alpha FG-GAP repeat containing 2		GO:0005654(nucleoplasm)//GO:0005829(cytosol)	GO:0003674(molecular_function)	GO:0002314(germinal center B cell differentiation)
Nrip2	ENSMUSG00000001520	protein_coding	+	chr6:128362966-128408932	0.548097	0.255089	2.14865	1.10343	1	1	up	0.756517	0.343785	0.543989	0.309521	0.131603	0.324142	60345	AW491344|NIX1	MGI:MGI:1891884|Ensembl:ENSMUSG00000001520|Vega:OTTMUSG00000026982	6	6|6 F3	nuclear receptor interacting protein 2		GO:0005634(nucleus)//GO:0005737(cytoplasm)	GO:0005515(protein binding)//GO:0004190(aspartic-type endopeptidase activity)	GO:0006508(proteolysis)//GO:0007219(Notch signaling pathway)//GO:0006351(transcription, DNA-templated)//GO:0006355(regulation of transcription, DNA-templated)//GO:0000122(negative regulation of transcription from RNA polymerase II promoter)
Tulp3	ENSMUSG00000001521	protein_coding	-	chr6:128321139-128355851	2.58306	2.15488	1.1987	0.26147	0.5844	0.999241	up	2.17114	3.24909	2.32894	2.52369	1.50603	2.43492	22158	2310022L06Rik|AI316887	MGI:MGI:1329045|Ensembl:ENSMUSG00000001521|Vega:OTTMUSG00000022778	6	6 F3|6 62.96 cM	tubby-like protein 3		GO:0005886(plasma membrane)//GO:0005929(cilium)//GO:0005576(extracellular region)//GO:0005930(axoneme)//GO:0016020(membrane)//GO:0042995(cell projection)//GO:0097546(ciliary base)//GO:0030991(intraciliary transport particle A)//GO:0072372(primary cilium)//GO:0005730(nucleolus)//GO:0005634(nucleus)//GO:0005737(cytoplasm)	GO:0019899(enzyme binding)//GO:0035091(phosphatidylinositol binding)//GO:0032403(protein complex binding)	GO:0097500(receptor localization to nonmotile primary cilium)//GO:0021915(neural tube development)//GO:0060831(smoothened signaling pathway involved in dorsal/ventral neural tube patterning)//GO:0021953(central nervous system neuron differentiation)//GO:1903546(protein localization to photoreceptor outer segment)//GO:0001843(neural tube closure)//GO:0060434(bronchus morphogenesis)//GO:0061548(gan…
Mnx1	ENSMUSG00000001566	protein_coding	-	chr5:29229813-29690037	0	0	1	0	1	1	up	0	0	0	0	0	0	15285	HB9|Hlxb9|MNR2	MGI:MGI:109160|Ensembl:ENSMUSG00000001566|Vega:OTTMUSG00000037528	5	5|5 B1	motor neuron and pancreas homeobox 1	mmu04950(Maturity onset diabetes of the young)	GO:0005730(nucleolus)//GO:0005634(nucleus)//GO:0005737(cytoplasm)	GO:0043565(sequence-specific DNA binding)//GO:0003677(DNA binding)//GO:0003700(transcription factor activity, sequence-specific DNA binding)	GO:0021520(spinal cord motor neuron cell fate specification)//GO:0060539(diaphragm development)//GO:0031018(endocrine pancreas development)//GO:0021675(nerve development)//GO:0009791(post-embryonic development)//GO:0006351(transcription, DNA-templated)//GO:0021904(dorsal/ventral neural tube patterning)//GO:0031016(pancreas development)//GO:0030182(neuron differentiation)//GO:0048667(cell morphoge…
Ergic1	ENSMUSG00000001576	protein_coding	+	chr17:26554253-26656931	10.3149	9.04265	1.14069	0.189913	0.45935	0.999241	up	11.3122	11.211	8.42153	6.42893	7.72538	12.9736	67458	1200007D18Rik|maa-136	MGI:MGI:1914708|Ensembl:ENSMUSG00000001576|Vega:OTTMUSG00000035774	17	17|17 B1	endoplasmic reticulum-golgi intermediate compartment (ERGIC) 1		GO:0005783(endoplasmic reticulum)//GO:0016020(membrane)//GO:0005793(endoplasmic reticulum-Golgi intermediate compartment)//GO:0005794(Golgi apparatus)//GO:0016021(integral component of membrane)	GO:0003674(molecular_function)	GO:0006810(transport)//GO:0016192(vesicle-mediated transport)//GO:0006888(ER to Golgi vesicle-mediated transport)
Tnk1	ENSMUSG00000001583	protein_coding	-	chr11:69846375-69858730	0	0	1	0	1	1	up	0	0	0	0	0	0	83813	Kos1|Tnk1a|Tnk1b	MGI:MGI:1930958|Ensembl:ENSMUSG00000001583|Vega:OTTMUSG00000006012	11	11|11 B3	tyrosine kinase, non-receptor, 1		GO:0016020(membrane)//GO:0031234(extrinsic component of cytoplasmic side of plasma membrane)//GO:0005737(cytoplasm)//GO:0005829(cytosol)	GO:0004713(protein tyrosine kinase activity)//GO:0004715(non-membrane spanning protein tyrosine kinase activity)//GO:0004672(protein kinase activity)//GO:0000166(nucleotide binding)//GO:0016301(kinase activity)//GO:0016740(transferase activity)//GO:0005524(ATP binding)//GO:0005102(receptor binding)	GO:0007169(transmembrane receptor protein tyrosine kinase signaling pathway)//GO:0045087(innate immune response)//GO:0016310(phosphorylation)//GO:0038083(peptidyl-tyrosine autophosphorylation)//GO:0006468(protein phosphorylation)//GO:0046580(negative regulation of Ras protein signal transduction)//GO:0030154(cell differentiation)//GO:0042127(regulation of cell proliferation)//GO:0046777(protein a…
Acap1	ENSMUSG00000001588	protein_coding	-	chr11:69881091-69895539	0.0852732	0.071783	1.18793	0.24845	1	1	up	0.18032	0	0.0754992	0.0797482	0.0372373	0.0983636	216859	Centb1	MGI:MGI:2388270|Ensembl:ENSMUSG00000001588|Vega:OTTMUSG00000006015	11	11|11 B3	ArfGAP with coiled-coil, ankyrin repeat and PH domains 1	mmu04144(Endocytosis)	GO:0005768(endosome)//GO:0016020(membrane)	GO:0004871(signal transducer activity)//GO:0003674(molecular_function)//GO:0046872(metal ion binding)//GO:0005096(GTPase activator activity)//GO:0016787(hydrolase activity)	GO:0006629(lipid metabolic process)//GO:0016042(lipid catabolic process)//GO:0008150(biological_process)//GO:0007165(signal transduction)
Tcea3	ENSMUSG00000001604	protein_coding	+	chr4:136247728-136274898	146.964	143.13	1.02679	0.0381417	0.84385	0.999241	up	150.864	150.722	139.307	138.484	143.273	147.634	21401	S-II|SII-K1	MGI:MGI:1196908|Ensembl:ENSMUSG00000001604|Vega:OTTMUSG00000009868	4	4|4 D3	transcription elongation factor A (SII), 3		GO:0005634(nucleus)	GO:0003676(nucleic acid binding)//GO:0008270(zinc ion binding)//GO:0003677(DNA binding)//GO:0046872(metal ion binding)	GO:0006357(regulation of transcription from RNA polymerase II promoter)//GO:0032784(regulation of DNA-templated transcription, elongation)//GO:0006351(transcription, DNA-templated)//GO:0006355(regulation of transcription, DNA-templated)
Csn3	ENSMUSG00000001622	protein_coding	+	chr5:87908587-87979351	0	0	1	0	1	1	up	0	0	0	0	0	0	12994	AW208918|CSN10|Csnk	MGI:MGI:107461|Ensembl:ENSMUSG00000001622|Vega:OTTMUSG00000025838	5	5 E1|5 43.56 cM	casein kappa		GO:0005576(extracellular region)//GO:0005615(extracellular space)	GO:0003674(molecular_function)	GO:0050821(protein stabilization)//GO:0007595(lactation)
Stk38l	ENSMUSG00000001630	protein_coding	+	chr6:146724994-146778812	3.55103	2.38581	1.4884	0.573759	0.015	0.641711	up	3.52524	3.54251	3.58533	1.89321	2.52556	2.73865	232533	4930473A22Rik|B230328I19|Ndr2|Ndr54	MGI:MGI:1922250|Ensembl:ENSMUSG00000001630|Vega:OTTMUSG00000025646	6	6|6 G3	serine/threonine kinase 38 like		GO:0016020(membrane)//GO:0015629(actin cytoskeleton)//GO:0005856(cytoskeleton)//GO:0005737(cytoplasm)	GO:0004674(protein serine/threonine kinase activity)//GO:0004672(protein kinase activity)//GO:0000287(magnesium ion binding)//GO:0000166(nucleotide binding)//GO:0016301(kinase activity)//GO:0046872(metal ion binding)//GO:0003779(actin binding)//GO:0005524(ATP binding)//GO:0016740(transferase activity)	GO:0016310(phosphorylation)//GO:0006468(protein phosphorylation)//GO:0018105(peptidyl-serine phosphorylation)//GO:0035556(intracellular signal transduction)//GO:0051128(regulation of cellular component organization)
Brpf1	ENSMUSG00000001632	protein_coding	+	chr6:113307180-113326747	1.86989	1.83981	1.01635	0.0233975	0.9259	0.999241	up	1.89931	2.03978	1.67059	1.61338	1.7127	2.19335	78783	4833438B11Rik|4930540D11Rik|Brpf2	MGI:MGI:1926033|Ensembl:ENSMUSG00000001632|Vega:OTTMUSG00000022740	6	6|6 E3	bromodomain and PHD finger containing, 1		GO:0005634(nucleus)//GO:0070776(MOZ/MORF histone acetyltransferase complex)		GO:0045893(positive regulation of transcription, DNA-templated)//GO:0043966(histone H3 acetylation)
Akr1b3	ENSMUSG00000001642	protein_coding	-	chr6:34290264-34324249	65.1289	59.2566	1.0991	0.136322	0.48095	0.999241	up	68.925	72.4437	54.0181	52.6444	59.0335	66.092	11677	ALR2|AR|Ahr-1|Ahr1|Akr1b1|Aldor1|Aldr1	MGI:MGI:1353494|Ensembl:ENSMUSG00000001642|Vega:OTTMUSG00000014776	6	6 14.87 cM|6 B1	aldo-keto reductase family 1, member B3 (aldose reductase)	mmu00040(Pentose and glucuronate interconversions)//mmu00051(Fructose and mannose metabolism)//mmu00052(Galactose metabolism)//mmu00561(Glycerolipid metabolism)//mmu01100(Metabolic pathways)	GO:0033010(paranodal junction)//GO:0043220(Schmidt-Lanterman incisure)//GO:0070062(extracellular exosome)//GO:0097454(Schwann cell microvillus)//GO:0032838(cell projection cytoplasm)//GO:0048471(perinuclear region of cytoplasm)//GO:0042629(mast cell granule)//GO:0005829(cytosol)//GO:0005654(nucleoplasm)//GO:0005615(extracellular space)//GO:0005737(cytoplasm)	GO:0016491(oxidoreductase activity)//GO:0004032(alditol:NADP+ 1-oxidoreductase activity)//GO:0043795(glyceraldehyde oxidoreductase activity)	GO:0009414(response to water deprivation)//GO:0055114(oxidation-reduction process)//GO:0006061(sorbitol biosynthetic process)//GO:0005996(monosaccharide metabolic process)//GO:0044598(doxorubicin metabolic process)//GO:0070301(cellular response to hydrogen peroxide)//GO:0048661(positive regulation of smooth muscle cell proliferation)//GO:0097238(cellular response to methylglyoxal)//GO:0044597(dau…
Hoxc13	ENSMUSG00000001655	protein_coding	+	chr15:102727245-103239816	0	0	1	0	1	1	up	0	0	0	0	0	0	15422	-	MGI:MGI:99560|Ensembl:ENSMUSG00000001655|Vega:OTTMUSG00000037392	15	15 F3|15 57.99 cM	homeobox C13		GO:0005634(nucleus)	GO:0001077(transcriptional activator activity, RNA polymerase II core promoter proximal region sequence-specific binding)//GO:0043565(sequence-specific DNA binding)//GO:0003682(chromatin binding)//GO:0003677(DNA binding)	GO:0035878(nail development)//GO:0009653(anatomical structure morphogenesis)//GO:0006351(transcription, DNA-templated)//GO:0001942(hair follicle development)//GO:0009952(anterior/posterior pattern specification)//GO:0007275(multicellular organism development)//GO:0045944(positive regulation of transcription from RNA polymerase II promoter)//GO:0043587(tongue morphogenesis)//GO:0006355(regulation …
Hoxc11	ENSMUSG00000001656	protein_coding	+	chr15:102727245-103239816	1.99928	1.32504	1.50884	0.593444	0.7971	0.999241	up	2.68094	1.98965	1.32726	1.07221	1.61734	1.28558	109663	Hox-3.7	MGI:MGI:96193|Ensembl:ENSMUSG00000001656|Vega:OTTMUSG00000035144	15	15 F3|15 58.02 cM	homeobox C11		GO:0005654(nucleoplasm)//GO:0005634(nucleus)//GO:0005737(cytoplasm)	GO:0001077(transcriptional activator activity, RNA polymerase II core promoter proximal region sequence-specific binding)//GO:0043565(sequence-specific DNA binding)//GO:0000978(RNA polymerase II core promoter proximal region sequence-specific DNA binding)//GO:0003677(DNA binding)	GO:0042733(embryonic digit morphogenesis)//GO:0001656(metanephros development)//GO:0009954(proximal/distal pattern formation)//GO:0001759(organ induction)//GO:0060272(embryonic skeletal joint morphogenesis)//GO:0001501(skeletal system development)//GO:0006351(transcription, DNA-templated)//GO:0009952(anterior/posterior pattern specification)//GO:0007275(multicellular organism development)//GO:004…
Gstt3	ENSMUSG00000001665	protein_coding	-	chr10:75771229-75781981	1.24661	0.774645	1.60927	0.686406	0.25065	0.999241	up	1.85101	1.02929	0.859542	0.757245	0.750096	0.816595	103140	AI118089	MGI:MGI:2143526|Ensembl:ENSMUSG00000001665|Vega:OTTMUSG00000031847	10	10|10 C1	glutathione S-transferase, theta 3	mmu00480(Glutathione metabolism)//mmu00980(Metabolism of xenobiotics by cytochrome P450)//mmu00982(Drug metabolism - cytochrome P450)//mmu05204(Chemical carcinogenesis)	GO:0005737(cytoplasm)	GO:0004364(glutathione transferase activity)	GO:0006749(glutathione metabolic process)
Marveld3	ENSMUSG00000001672	protein_coding	-	chr8:109947913-109962203	0.00972728	0	inf	inf	1	1	up	0.0291818	0	0	0	0	0	73608	1810006A16Rik|AI642133|Marvd3|Mrvldc3	MGI:MGI:1920858|Ensembl:ENSMUSG00000001672|Vega:OTTMUSG00000027477	8	8|8 D3	MARVEL (membrane-associating) domain containing 3		GO:0005923(bicellular tight junction)//GO:0016020(membrane)//GO:0016021(integral component of membrane)//GO:0030054(cell junction)//GO:0031410(cytoplasmic vesicle)	GO:0031435(mitogen-activated protein kinase kinase kinase binding)	GO:0046329(negative regulation of JNK cascade)//GO:1902414(protein localization to cell junction)//GO:0070830(bicellular tight junction assembly)//GO:0006970(response to osmotic stress)//GO:0010633(negative regulation of epithelial cell migration)//GO:0050680(negative regulation of epithelial cell proliferation)//GO:0045216(cell-cell junction organization)
Ubl3	ENSMUSG00000001687	protein_coding	-	chr5:148504630-148552789	28.0474	26.9651	1.04014	0.0567736	0.7621	0.999241	up	29.4865	28.6725	25.9832	22.897	28.0475	29.9508	24109	AW108023|HCG	MGI:MGI:1344373|Ensembl:ENSMUSG00000001687|Vega:OTTMUSG00000055806	5	5|5 G2-3	ubiquitin-like 3		GO:0005622(intracellular)//GO:0005886(plasma membrane)//GO:0070062(extracellular exosome)//GO:0016020(membrane)	GO:0003674(molecular_function)	GO:0008150(biological_process)
Tcirg1	ENSMUSG00000001750	protein_coding	-	chr19:3896049-3907133	1.46024	1.2889	1.13294	0.18007	0.72015	0.999241	up	1.97393	1.58766	0.819135	1.59114	1.42837	0.847182	27060	ATP6N1C|ATP6a3|Atp6i|OC-116|OPTB1|Stv1|TIRC7|Vph1|oc	MGI:MGI:1350931|Ensembl:ENSMUSG00000001750|Vega:OTTMUSG00000033070	19	19 A|19 3.62 cM	T cell, immune regulator 1, ATPase, H+ transporting, lysosomal V0 protein A3	mmu00190(Oxidative phosphorylation)//mmu01100(Metabolic pathways)//mmu04142(Lysosome)//mmu04145(Phagosome)//mmu04721(Synaptic vesicle cycle)//mmu04966(Collecting duct acid secretion)//mmu05152(Tuberculosis)//mmu05323(Rheumatoid arthritis)	GO:0005765(lysosomal membrane)//GO:0016471(vacuolar proton-transporting V-type ATPase complex)//GO:0005886(plasma membrane)//GO:0005739(mitochondrion)//GO:0016324(apical plasma membrane)	GO:0046961(proton-transporting ATPase activity, rotational mechanism)//GO:0051117(ATPase binding)	GO:0007035(vacuolar acidification)//GO:0015986(ATP synthesis coupled proton transport)//GO:0007039(protein catabolic process in the vacuole)//GO:0070072(vacuolar proton-transporting V-type ATPase complex assembly)//GO:0016236(macroautophagy)
Tspan33	ENSMUSG00000001763	protein_coding	+	chr6:29694221-29718559	0.537194	0.42326	1.26918	0.343899	1	1	up	0.3074	0.707323	0.596861	0.467715	0.394129	0.407936	232670	1300010A20Rik|Pen	MGI:MGI:1919012|Ensembl:ENSMUSG00000001763|Vega:OTTMUSG00000013447	6	6|6 A3.3	tetraspanin 33		GO:0005886(plasma membrane)//GO:0005887(integral component of plasma membrane)//GO:0009986(cell surface)//GO:0016020(membrane)//GO:0097197(tetraspanin-enriched microdomain)//GO:0016021(integral component of membrane)	GO:0019899(enzyme binding)	GO:0090002(establishment of protein localization to plasma membrane)//GO:0045747(positive regulation of Notch signaling pathway)//GO:0051604(protein maturation)//GO:0007166(cell surface receptor signaling pathway)
Crnkl1	ENSMUSG00000001767	protein_coding	-	chr2:145917478-146215039	7.28831	7.20827	1.0111	0.0159318	0.93345	0.999241	up	7.71143	7.45902	6.69449	6.89535	6.8921	7.83736	66877	1200013P10Rik|5730590A01Rik|C80326|crn	MGI:MGI:1914127|Ensembl:ENSMUSG00000001767|Vega:OTTMUSG00000004058	2	2|2 G1	Crn, crooked neck-like 1 (Drosophila)	mmu03040(Spliceosome)	GO:0071011(precatalytic spliceosome)//GO:0071013(catalytic step 2 spliceosome)//GO:0071012(catalytic step 1 spliceosome)//GO:0071010(prespliceosome)//GO:0000974(Prp19 complex)//GO:0005634(nucleus)//GO:0005681(spliceosomal complex)//GO:0071014(post-mRNA release spliceosomal complex)	GO:0044822(poly(A) RNA binding)//GO:0003723(RNA binding)	GO:0000245(spliceosomal complex assembly)//GO:0008380(RNA splicing)//GO:0006396(RNA processing)//GO:0098792(xenophagy)//GO:0000398(mRNA splicing, via spliceosome)//GO:0098779(mitophagy in response to mitochondrial depolarization)//GO:0006397(mRNA processing)//GO:0002230(positive regulation of defense response to virus by host)
Rin2	ENSMUSG00000001768	protein_coding	+	chr2:145784733-145887616	2.90496	2.2954	1.26556	0.339771	0.2389	0.999241	up	3.08383	3.23002	2.40103	2.98191	1.76832	2.13597	74030	2010003K16Rik|4632403N06Rik|AW821980|RASSF4	MGI:MGI:1921280|Ensembl:ENSMUSG00000001768|Vega:OTTMUSG00000004057	2	2|2 G1	Ras and Rab interactor 2		GO:0005575(cellular_component)//GO:0005737(cytoplasm)	GO:0003674(molecular_function)//GO:0005096(GTPase activator activity)	GO:0006897(endocytosis)//GO:0008150(biological_process)//GO:0007165(signal transduction)
Chordc1	ENSMUSG00000001774	protein_coding	+	chr9:18292266-18314000	38.5796	36.6212	1.05348	0.0751586	0.68775	0.999241	up	35.187	45.6259	34.9259	35.8314	35.647	38.3852	66917	1110001O09Rik|AA409036|Chp-1|morgana	MGI:MGI:1914167|Ensembl:ENSMUSG00000001774	9	9|9 A3	cysteine and histidine-rich domain (CHORD)-containing, zinc-binding protein 1			GO:0008270(zinc ion binding)//GO:0005524(ATP binding)//GO:0043531(ADP binding)//GO:0051879(Hsp90 protein binding)//GO:0046872(metal ion binding)//GO:0005515(protein binding)//GO:0005509(calcium ion binding)	GO:0061077(chaperone-mediated protein folding)//GO:0010824(regulation of centrosome duplication)//GO:2000299(negative regulation of Rho-dependent protein serine/threonine kinase activity)//GO:1900034(regulation of cellular response to heat)
Rtcb	ENSMUSG00000001783	protein_coding	-	chr10:85928490-85957823	16.6539	16.5765	1.00467	0.00672076	0.96985	0.999241	up	15.5247	18.7642	15.6728	15.2308	17.4111	17.0875	28088	AI255213|AI463255|D10Wsu52e|FAAP|HSPC117	MGI:MGI:106379|Ensembl:ENSMUSG00000001783|Vega:OTTMUSG00000023233	10	10 C1|10 41.81 cM	RNA 2',3'-cyclic phosphate and 5'-OH ligase		GO:0072669(tRNA-splicing ligase complex)//GO:0005634(nucleus)//GO:0005789(endoplasmic reticulum membrane)//GO:0005737(cytoplasm)//GO:0005635(nuclear envelope)	GO:0017166(vinculin binding)//GO:0005524(ATP binding)//GO:0003972(RNA ligase (ATP) activity)//GO:0000166(nucleotide binding)//GO:0016874(ligase activity)//GO:0044822(poly(A) RNA binding)//GO:0008452(RNA ligase activity)//GO:0046872(metal ion binding)	GO:0006388(tRNA splicing, via endonucleolytic cleavage and ligation)//GO:0001890(placenta development)//GO:0006396(RNA processing)//GO:0008033(tRNA processing)//GO:0001701(in utero embryonic development)
Fbxo7	ENSMUSG00000001786	protein_coding	+	chr10:86021779-86051873	3.42034	3.29835	1.03698	0.0523925	0.84785	0.999241	up	3.39231	3.50998	3.35873	3.37866	2.4722	4.0442	69754	2410015K21Rik|A230052G17Rik|AI117679|AW260462|C85118	MGI:MGI:1917004|Ensembl:ENSMUSG00000001786|Vega:OTTMUSG00000028680	10	10|10 C1	F-box protein 7		GO:0043234(protein complex)//GO:0005829(cytosol)//GO:0005739(mitochondrion)//GO:0005634(nucleus)//GO:0005737(cytoplasm)//GO:0000151(ubiquitin ligase complex)	GO:0019901(protein kinase binding)	GO:2000134(negative regulation of G1/S transition of mitotic cell cycle)//GO:0045620(negative regulation of lymphocyte differentiation)//GO:0045736(negative regulation of cyclin-dependent protein serine/threonine kinase activity)//GO:0016567(protein ubiquitination)//GO:0031647(regulation of protein stability)//GO:0000422(mitophagy)//GO:0006626(protein targeting to mitochondrion)
Lrp3	ENSMUSG00000001802	protein_coding	-	chr7:35186384-35215370	0.989935	0.872782	1.13423	0.181712	0.66025	0.999241	up	0.601479	1.46329	0.905036	0.600127	1.09501	0.923214	435965	-	MGI:MGI:3584516|Ensembl:ENSMUSG00000001802|Vega:OTTMUSG00000027211	7	7|7 B1	low density lipoprotein receptor-related protein 3		GO:0005575(cellular_component)	GO:0005515(protein binding)	GO:0008150(biological_process)
Dsg4	ENSMUSG00000001804	protein_coding	+	chr18:20436174-20471821	0	0	1	0	1	1	up	0	0	0	0	0	0	16769	CDHF13|lah	MGI:MGI:2661061|Ensembl:ENSMUSG00000001804|Vega:OTTMUSG00000028141	18	18 A2|18 11.35 cM	desmoglein 4		GO:0016020(membrane)//GO:0005886(plasma membrane)//GO:0030054(cell junction)//GO:0016021(integral component of membrane)//GO:0030057(desmosome)	GO:0046872(metal ion binding)//GO:0005509(calcium ion binding)	GO:0030509(BMP signaling pathway)//GO:0030216(keratinocyte differentiation)//GO:0007156(homophilic cell adhesion via plasma membrane adhesion molecules)//GO:0007155(cell adhesion)//GO:0001942(hair follicle development)//GO:0016337(single organismal cell-cell adhesion)//GO:0042640(anagen)
Evx2	ENSMUSG00000001815	protein_coding	-	chr2:74652996-74659861	0.0552138	0	inf	inf	1	1	up	0.0155204	0.0139845	0.136136	0	0	0	14029	Evx-2	MGI:MGI:95462|Ensembl:ENSMUSG00000001815|Vega:OTTMUSG00000013302	2	2 C3|2 44.13 cM	even-skipped homeobox 2		GO:0005654(nucleoplasm)//GO:0005634(nucleus)	GO:0043565(sequence-specific DNA binding)//GO:0003677(DNA binding)	GO:0007275(multicellular organism development)//GO:0006355(regulation of transcription, DNA-templated)//GO:0035108(limb morphogenesis)
Hoxd13	ENSMUSG00000001819	protein_coding	+	chr2:74668309-74671599	0.170156	0.0304453	5.58892	2.48257	1	1	up	0.0287359	0.387458	0.0942747	0	0	0.091336	15433	Hox-4.8|spdh	MGI:MGI:96205|Ensembl:ENSMUSG00000001819|Vega:OTTMUSG00000013304	2	2 C3|2 44.13 cM	homeobox D13		GO:0005634(nucleus)	GO:0000978(RNA polymerase II core promoter proximal region sequence-specific DNA binding)//GO:0003700(transcription factor activity, sequence-specific DNA binding)//GO:0043565(sequence-specific DNA binding)//GO:0003682(chromatin binding)//GO:0001077(transcriptional activator activity, RNA polymerase II core promoter proximal region sequence-specific binding)//GO:0003677(DNA binding)	GO:0042733(embryonic digit morphogenesis)//GO:0060687(regulation of branching involved in prostate gland morphogenesis)//GO:0030326(embryonic limb morphogenesis)//GO:0022612(gland morphogenesis)//GO:0030539(male genitalia development)//GO:0001501(skeletal system development)//GO:0006351(transcription, DNA-templated)//GO:0060527(prostate epithelial cord arborization involved in prostate glandular …
Hoxd12	ENSMUSG00000001823	protein_coding	+	chr2:74674928-74677706	0	0	1	0	1	1	up	0	0	0	0	0	0	15432	Hox-4.7|Hox-5.6	MGI:MGI:96204|Ensembl:ENSMUSG00000001823|Vega:OTTMUSG00000016555	2	2 C3|2 44.13 cM	homeobox D12		GO:0005667(transcription factor complex)//GO:0005634(nucleus)	GO:0043565(sequence-specific DNA binding)//GO:0005515(protein binding)//GO:0003677(DNA binding)	GO:0042733(embryonic digit morphogenesis)//GO:0001501(skeletal system development)//GO:0006351(transcription, DNA-templated)//GO:0007275(multicellular organism development)//GO:0006355(regulation of transcription, DNA-templated)//GO:0007389(pattern specification process)
Clpb	ENSMUSG00000001829	protein_coding	+	chr7:101663632-101790168	18.0286	16.4767	1.09419	0.129866	0.6316	0.999241	up	21.6856	16.8242	15.576	16.6294	20.6436	12.157	20480	AL118244|Skd3	MGI:MGI:1100517|Ensembl:ENSMUSG00000001829|Vega:OTTMUSG00000022234	7	7|7 F1	ClpB caseinolytic peptidase B	mmu04213(Longevity regulating pathway - multiple species)	GO:0005739(mitochondrion)	GO:0005524(ATP binding)//GO:0000166(nucleotide binding)//GO:0016887(ATPase activity)//GO:0016787(hydrolase activity)	GO:0034605(cellular response to heat)
Sept7	ENSMUSG00000001833	protein_coding	+	chr9:25252438-25308571	62.2162	58.4357	1.0647	0.0904405	0.6349	0.999241	up	60.9202	70.4251	55.3033	55.0318	61.4768	58.7985	235072	Cdc10|E430034N22	MGI:MGI:1335094|Ensembl:ENSMUSG00000001833	9	9|9 A4	septin 7		GO:0043234(protein complex)//GO:0043005(neuron projection)//GO:0001725(stress fiber)//GO:0031513(nonmotile primary cilium)//GO:0044297(cell body)//GO:0005737(cytoplasm)//GO:0043209(myelin sheath)//GO:0005930(axoneme)//GO:0016020(membrane)//GO:0015629(actin cytoskeleton)//GO:0045202(synapse)//GO:0031105(septin complex)//GO:0005730(nucleolus)//GO:0005634(nucleus)//GO:0000775(chromosome, centromeric…	GO:0000166(nucleotide binding)//GO:0046982(protein heterodimerization activity)//GO:0005515(protein binding)//GO:0005525(GTP binding)//GO:0042802(identical protein binding)	GO:0007067(mitotic nuclear division)//GO:1902857(positive regulation of nonmotile primary cilium assembly)//GO:0000281(mitotic cytokinesis)//GO:0051291(protein heterooligomerization)//GO:0060997(dendritic spine morphogenesis)//GO:0051301(cell division)//GO:0007049(cell cycle)//GO:0048668(collateral sprouting)//GO:0031270(pseudopodium retraction)//GO:0030865(cortical cytoskeleton organization)
Rac1	ENSMUSG00000001847	protein_coding	-	chr5:143505477-143528036	74.8537	69.7949	1.07248	0.100952	0.5884	0.999241	up	78.0988	75.5405	70.9218	62.4276	71.1681	75.7888	19353	AL023026|D5Ertd559e	MGI:MGI:97845|Ensembl:ENSMUSG00000001847|Vega:OTTMUSG00000020705	5	5 G2|5 82.22 cM	RAS-related C3 botulinum substrate 1	mmu04010(MAPK signaling pathway)//mmu04014(Ras signaling pathway)//mmu04015(Rap1 signaling pathway)//mmu04024(cAMP signaling pathway)//mmu04062(Chemokine signaling pathway)//mmu04071(Sphingolipid signaling pathway)//mmu04145(Phagosome)//mmu04151(PI3K-Akt signaling pathway)//mmu04310(Wnt signaling pathway)//mmu04360(Axon guidance)//mmu04370(VEGF signaling pathway)//mmu04380(Osteoclast differentiat…	GO:0001891(phagocytic cup)//GO:0005886(plasma membrane)//GO:0070062(extracellular exosome)//GO:0030027(lamellipodium)//GO:0005802(trans-Golgi network)//GO:0016020(membrane)//GO:0005925(focal adhesion)//GO:0005829(cytosol)//GO:0005884(actin filament)//GO:0031901(early endosome membrane)//GO:0060091(kinocilium)//GO:0036464(cytoplasmic ribonucleoprotein granule)//GO:0000139(Golgi membrane)//GO:00314…	GO:0017137(Rab GTPase binding)//GO:0042826(histone deacetylase binding)//GO:0019901(protein kinase binding)//GO:0003924(GTPase activity)//GO:0019899(enzyme binding)//GO:0030742(GTP-dependent protein binding)//GO:0051022(Rho GDP-dissociation inhibitor binding)//GO:0000166(nucleotide binding)//GO:0005525(GTP binding)//GO:0031996(thioesterase binding)//GO:0005515(protein binding)	GO:0006897(endocytosis)//GO:0060263(regulation of respiratory burst)//GO:0035567(non-canonical Wnt signaling pathway)//GO:0002551(mast cell chemotaxis)//GO:0007015(actin filament organization)//GO:0016477(cell migration)//GO:0071542(dopaminergic neuron differentiation)//GO:0021831(embryonic olfactory bulb interneuron precursor migration)//GO:0031529(ruffle organization)//GO:1900026(positive regul…
Aif1l	ENSMUSG00000001864	protein_coding	+	chr2:31950259-31973442	0.935949	0.865798	1.08102	0.112399	0.811	0.999241	up	0.548191	1.97546	0.284195	0.681387	1.40481	0.511195	108897	2810003C17Rik|AI043124|C87647|Iba2	MGI:MGI:1919598|Ensembl:ENSMUSG00000001864|Vega:OTTMUSG00000012243	2	2|2 B	allograft inflammatory factor 1-like		GO:0005886(plasma membrane)//GO:0043234(protein complex)//GO:0016020(membrane)//GO:0015629(actin cytoskeleton)//GO:0042995(cell projection)//GO:0005884(actin filament)//GO:0070062(extracellular exosome)//GO:0005737(cytoplasm)//GO:0005856(cytoskeleton)//GO:0005925(focal adhesion)	GO:0046872(metal ion binding)//GO:0003779(actin binding)//GO:0051015(actin filament binding)//GO:0005509(calcium ion binding)	GO:0008150(biological_process)
Cpa3	ENSMUSG00000001865	protein_coding	-	chr3:20215616-20242181	0.792764	0.504135	1.57252	0.65308	0.20455	0.999241	up	1.02196	1.18943	0.166903	0.588634	0.439031	0.48474	12873	MC-CPA	MGI:MGI:88479|Ensembl:ENSMUSG00000001865|Vega:OTTMUSG00000051236	3	3 A2|3 6.25 cM	carboxypeptidase A3, mast cell	mmu04614(Renin-angiotensin system)//mmu04972(Pancreatic secretion)//mmu04974(Protein digestion and absorption)	GO:0005615(extracellular space)//GO:0031410(cytoplasmic vesicle)	GO:0008237(metallopeptidase activity)//GO:0008233(peptidase activity)//GO:0008270(zinc ion binding)//GO:0004181(metallocarboxypeptidase activity)//GO:0004180(carboxypeptidase activity)//GO:0046872(metal ion binding)//GO:0016787(hydrolase activity)	GO:0002002(regulation of angiotensin levels in blood)//GO:0006508(proteolysis)//GO:0002230(positive regulation of defense response to virus by host)//GO:0098792(xenophagy)
Ltbp1	ENSMUSG00000001870	protein_coding	+	chr17:75005567-75392512	3.1589	2.66131	1.18697	0.247284	0.28405	0.999241	up	2.94135	3.64364	2.89172	2.90429	2.46537	2.61428	268977	9430031G15Rik|9830146M04|Ltbp-1|Ltbp1L|Tgfb|b2b1000Clo	MGI:MGI:109151|Ensembl:ENSMUSG00000001870|Vega:OTTMUSG00000020204	17	17|17 E3	latent transforming growth factor beta binding protein 1	mmu04350(TGF-beta signaling pathway)	GO:0048471(perinuclear region of cytoplasm)//GO:0005576(extracellular region)//GO:0030425(dendrite)//GO:0043234(protein complex)//GO:0038045(large latent transforming growth factor-beta complex)//GO:0005739(mitochondrion)//GO:0005578(proteinaceous extracellular matrix)//GO:0031012(extracellular matrix)//GO:0001527(microfibril)//GO:0005615(extracellular space)//GO:0005737(cytoplasm)//GO:0043025(ne…	GO:0050436(microfibril binding)//GO:0050431(transforming growth factor beta binding)//GO:0019838(growth factor binding)//GO:0005509(calcium ion binding)	GO:0007179(transforming growth factor beta receptor signaling pathway)//GO:0060976(coronary vasculature development)//GO:0035904(aorta development)//GO:0003281(ventricular septum development)//GO:0032967(positive regulation of collagen biosynthetic process)
Kcnh6	ENSMUSG00000001901	protein_coding	+	chr11:106008123-106034549	0	0	1	0	1	1	up	0	0	0	0	0	0	192775	m-erg2	MGI:MGI:2684139|Ensembl:ENSMUSG00000001901|Vega:OTTMUSG00000002939	11	11|11 E1	potassium voltage-gated channel, subfamily H (eag-related), member 6		GO:0005887(integral component of plasma membrane)	GO:0005242(inward rectifier potassium channel activity)//GO:0005249(voltage-gated potassium channel activity)	GO:0006813(potassium ion transport)//GO:0051291(protein heterooligomerization)//GO:0042391(regulation of membrane potential)
Trmt1	ENSMUSG00000001909	protein_coding	+	chr8:84670478-84699808	13.119	11.6878	1.12245	0.166657	0.5925	0.999241	up	12.261	13.9097	13.1863	11.816	13.257	9.99034	212528	6720406L13Rik|6720477L24|D8Ertd812e	MGI:MGI:1289155|Ensembl:ENSMUSG00000001909|Vega:OTTMUSG00000022183	8	8 C3|8 41.02 cM	tRNA methyltransferase 1		GO:0005739(mitochondrion)//GO:0005634(nucleus)	GO:0003723(RNA binding)//GO:0000049(tRNA binding)//GO:0008168(methyltransferase activity)//GO:0044822(poly(A) RNA binding)//GO:0004809(tRNA (guanine-N2-)-methyltransferase activity)//GO:0046872(metal ion binding)//GO:0016740(transferase activity)	GO:0002940(tRNA N2-guanine methylation)//GO:0032259(methylation)//GO:0008033(tRNA processing)
Nacc1	ENSMUSG00000001910	protein_coding	-	chr8:84670478-84699808	2.06666	1.63083	1.26724	0.341694	0.4815	0.999241	up	2.87143	1.45348	1.87506	1.75005	1.32195	1.82049	66830	2010001H03Rik|4930511N13Rik|Btbd14b|Nac1	MGI:MGI:1914080|Ensembl:ENSMUSG00000001910	8	8 C3|8 41.02 cM	nucleus accumbens associated 1, BEN and BTB (POZ) domain containing		GO:0005634(nucleus)//GO:0016604(nuclear body)//GO:0005737(cytoplasm)	GO:0005515(protein binding)	GO:0045892(negative regulation of transcription, DNA-templated)//GO:0008284(positive regulation of cell proliferation)//GO:0006351(transcription, DNA-templated)//GO:0006355(regulation of transcription, DNA-templated)//GO:0051260(protein homooligomerization)
Nfix	ENSMUSG00000001911	protein_coding	-	chr8:84699875-84800344	24.9088	19.9652	1.24761	0.319168	0.1095	0.999241	up	23.4393	24.9909	26.2961	16.464	21.1666	22.265	18032	CTF|NF-I/X|NF1-X|NFI-X	MGI:MGI:97311|Ensembl:ENSMUSG00000001911|Vega:OTTMUSG00000022188	8	8 41.02 cM|8 C1-C2	nuclear factor I/X		GO:0005622(intracellular)//GO:0005634(nucleus)	GO:0003700(transcription factor activity, sequence-specific DNA binding)//GO:0000977(RNA polymerase II regulatory region sequence-specific DNA binding)//GO:0003677(DNA binding)//GO:0001228(transcriptional activator activity, RNA polymerase II transcription regulatory region sequence-specific binding)	GO:0048708(astrocyte differentiation)//GO:0021680(cerebellar Purkinje cell layer development)//GO:0021707(cerebellar granule cell differentiation)//GO:0021549(cerebellum development)//GO:0006351(transcription, DNA-templated)//GO:0045944(positive regulation of transcription from RNA polymerase II promoter)//GO:0000122(negative regulation of transcription from RNA polymerase II promoter)//GO:000626…
Uba1	ENSMUSG00000001924	protein_coding	+	chrX:20658325-20683179	28.5723	26.962	1.05972	0.0836888	0.75295	0.999241	up	28.7198	27.4665	29.5306	24.8391	28.4121	27.6348	22201	A1S9|Sbx|Ube-1|Ube1x	MGI:MGI:98890|Ensembl:ENSMUSG00000001924|Vega:OTTMUSG00000017113	X	X 16.15 cM|X A2-A3	ubiquitin-like modifier activating enzyme 1	mmu04120(Ubiquitin mediated proteolysis)//mmu05012(Parkinson's disease)	GO:0070062(extracellular exosome)//GO:0000792(heterochromatin)//GO:0010008(endosome membrane)//GO:0030057(desmosome)//GO:0005829(cytosol)//GO:0005765(lysosomal membrane)//GO:0005739(mitochondrion)//GO:0030867(rough endoplasmic reticulum membrane)//GO:0005634(nucleus)//GO:0005737(cytoplasm)	GO:0005524(ATP binding)//GO:0004842(ubiquitin-protein transferase activity)//GO:0008641(small protein activating enzyme activity)//GO:0004839(ubiquitin activating enzyme activity)//GO:0000166(nucleotide binding)//GO:0016874(ligase activity)//GO:0044822(poly(A) RNA binding)//GO:0005515(protein binding)	GO:0006464(cellular protein modification process)//GO:0019941(modification-dependent protein catabolic process)//GO:0006974(cellular response to DNA damage stimulus)
Siae	ENSMUSG00000001942	protein_coding	+	chr9:37613846-37648318	1.98518	1.83663	1.08088	0.112208	0.65945	0.999241	up	2.10924	1.91725	1.92906	1.89277	1.72596	1.89118	22619	LSE|Ysg2	MGI:MGI:104803|Ensembl:ENSMUSG00000001942|Vega:OTTMUSG00000027448	9	9 A4|9 20.79 cM	sialic acid acetylesterase		GO:0005764(lysosome)//GO:0070062(extracellular exosome)//GO:0005615(extracellular space)//GO:0005737(cytoplasm)	GO:0052689(carboxylic ester hydrolase activity)//GO:0001681(sialate O-acetylesterase activity)//GO:0016787(hydrolase activity)	GO:0005975(carbohydrate metabolic process)//GO:0002682(regulation of immune system process)
Vsig2	ENSMUSG00000001943	protein_coding	+	chr9:37539254-37544205	0.721104	0.686602	1.05025	0.0707336	0.89205	0.999241	up	0.58424	0.521764	1.05731	0.821499	0.556226	0.682082	57276	1190004B15Rik|2210413P10Rik|AU040484|CTX|Ctm	MGI:MGI:1928009|Ensembl:ENSMUSG00000001943	9	9|9 B	V-set and immunoglobulin domain containing 2		GO:0016020(membrane)//GO:0016021(integral component of membrane)//GO:0005887(integral component of plasma membrane)	GO:0003674(molecular_function)	GO:0008150(biological_process)
Fam50a	ENSMUSG00000001962	protein_coding	+	chrX:74313032-74320149	13.7284	13.0381	1.05295	0.0744359	0.72405	0.999241	up	14.548	13.745	12.8922	12.5374	14.0541	12.5226	108160	D0HXS9928E|XAP-5	MGI:MGI:1351626|Ensembl:ENSMUSG00000001962|Vega:OTTMUSG00000017658	X	X|X A7.3	family with sequence similarity 50, member A		GO:0005654(nucleoplasm)//GO:0005634(nucleus)	GO:0044822(poly(A) RNA binding)
Taco1	ENSMUSG00000001983	protein_coding	+	chr11:106065076-106073612	28.3183	23.3046	1.21514	0.281118	0.1444	0.999241	up	29.1629	30.0995	25.6925	21.2316	25.4014	23.2809	70207	2310066I18Rik|Ccdc44	MGI:MGI:1917457|Ensembl:ENSMUSG00000001983|Vega:OTTMUSG00000003077	11	11|11 E1	translational activator of mitochondrially encoded cytochrome c oxidase I		GO:0005739(mitochondrion)//GO:0005634(nucleus)	GO:0003674(molecular_function)	GO:0006417(regulation of translation)//GO:0008150(biological_process)
Grik3	ENSMUSG00000001985	protein_coding	+	chr4:125490699-125714173	0.00560274	0.00547954	1.02248	0.032078	1	1	up	0	0	0.0168082	0	0.00829072	0.00814791	14807	9630027E11|GluK3|GluR7-3|Glur-7|Glur7	MGI:MGI:95816|Ensembl:ENSMUSG00000001985|Vega:OTTMUSG00000009249	4	4 D2.2|4 58.91 cM	glutamate receptor, ionotropic, kainate 3	mmu04080(Neuroactive ligand-receptor interaction)//mmu04724(Glutamatergic synapse)	GO:0005886(plasma membrane)//GO:0005887(integral component of plasma membrane)//GO:0043204(perikaryon)//GO:0016020(membrane)//GO:0030425(dendrite)//GO:0030424(axon)//GO:0016021(integral component of membrane)//GO:0045202(synapse)//GO:0030054(cell junction)//GO:0032839(dendrite cytoplasm)//GO:0045211(postsynaptic membrane)//GO:0043195(terminal bouton)	GO:0001640(adenylate cyclase inhibiting G-protein coupled glutamate receptor activity)//GO:0004872(receptor activity)//GO:0015277(kainate selective glutamate receptor activity)//GO:0008066(glutamate receptor activity)//GO:0005216(ion channel activity)//GO:0004970(ionotropic glutamate receptor activity)//GO:0005234(extracellular-glutamate-gated ion channel activity)//GO:0005515(protein binding)	GO:0007215(glutamate receptor signaling pathway)//GO:0042391(regulation of membrane potential)//GO:0007216(G-protein coupled glutamate receptor signaling pathway)//GO:0051967(negative regulation of synaptic transmission, glutamatergic)//GO:0006810(transport)//GO:0006811(ion transport)
Npas1	ENSMUSG00000001988	protein_coding	-	chr7:16455720-16476780	0	0	1	0	1	1	up	0	0	0	0	0	0	18142	MOP5|bHLHe11	MGI:MGI:109205|Ensembl:ENSMUSG00000001988	7	7 A2|7 9.14 cM	neuronal PAS domain protein 1		GO:0005634(nucleus)	GO:0000981(RNA polymerase II transcription factor activity, sequence-specific DNA binding)//GO:0046983(protein dimerization activity)//GO:0003677(DNA binding)	GO:0001964(startle response)//GO:0006351(transcription, DNA-templated)//GO:0042711(maternal behavior)//GO:0000122(negative regulation of transcription from RNA polymerase II promoter)//GO:0006355(regulation of transcription, DNA-templated)//GO:0032502(developmental process)
Ap4e1	ENSMUSG00000001998	protein_coding	+	chr2:127008716-127067909	3.05227	2.40722	1.26797	0.342517	0.15525	0.999241	up	3.04294	2.56073	3.55316	1.47757	2.88601	2.85808	108011	2310033A20Rik|9930028M04Rik|AV087807	MGI:MGI:1336993|Ensembl:ENSMUSG00000001998|Vega:OTTMUSG00000016016	2	2 F1|2 61.76 cM	adaptor-related protein complex AP-4, epsilon 1	mmu04142(Lysosome)	GO:0016020(membrane)//GO:0005905(clathrin-coated pit)//GO:0005794(Golgi apparatus)//GO:0030117(membrane coat)//GO:0005802(trans-Golgi network)		GO:0016192(vesicle-mediated transport)//GO:0006810(transport)//GO:0015031(protein transport)//GO:0006886(intracellular protein transport)
Pdzd4	ENSMUSG00000002006	protein_coding	-	chrX:73793358-73824969	0.174408	0.0794017	2.19654	1.13523	1	1	up	0.251601	0.175087	0.0965377	0.0447245	0.152383	0.0410977	245469	B230341P03|D130075J17Rik|Kiaa1444-hp|LU1|PDZRN4L|Pdzk4|Pdzrnk4l|Xlu	MGI:MGI:2443483|Ensembl:ENSMUSG00000002006|Vega:OTTMUSG00000017680	X	X|X A7.3	PDZ domain containing 4		GO:0005575(cellular_component)//GO:0005737(cytoplasm)
Pnck	ENSMUSG00000002012	protein_coding	-	chrX:73655993-73660117	1.65781	1.5663	1.05842	0.0819155	0.8055	0.999241	up	2.17504	1.64347	1.15492	0.628592	2.23985	1.83047	93843	Bstk3|CaMKIbeta2|CaMKlb2|Camk1b|Punc|caMKlb1	MGI:MGI:1347357|Ensembl:ENSMUSG00000002012|Vega:OTTMUSG00000017681	X	X A7.3|X 37.38 cM	pregnancy upregulated non-ubiquitously expressed CaM kinase		GO:0005634(nucleus)//GO:0005737(cytoplasm)	GO:0004674(protein serine/threonine kinase activity)//GO:0004672(protein kinase activity)//GO:0005516(calmodulin binding)//GO:0004683(calmodulin-dependent protein kinase activity)//GO:0000166(nucleotide binding)//GO:0016301(kinase activity)//GO:0005524(ATP binding)//GO:0016740(transferase activity)	GO:0016310(phosphorylation)//GO:0006468(protein phosphorylation)
Fam98a	ENSMUSG00000002017	protein_coding	-	chr17:75537085-75551946	17.1209	16.7394	1.02279	0.0325096	0.8628	0.999241	up	18.6547	17.3913	15.3166	16.4065	16.8331	16.9786	72722	2810405J04Rik|AL024114	MGI:MGI:1919972|Ensembl:ENSMUSG00000002017|Vega:OTTMUSG00000032863	17	17|17 E2	family with sequence similarity 98, member A		GO:0072669(tRNA-splicing ligase complex)	GO:0044822(poly(A) RNA binding)	GO:0008150(biological_process)
Kmt2a	ENSMUSG00000002028	protein_coding	-	chr9:44803354-44881296	2.40222	1.99671	1.20309	0.266743	0.16395	0.999241	up	2.20376	2.55381	2.44908	1.64244	1.81314	2.53454	214162	6430520K01|ALL-1|All1|Cxxc7|HRX|HTRX1|Mll|Mll1|mKIAA4050	MGI:MGI:96995|Ensembl:ENSMUSG00000002028|Vega:OTTMUSG00000021055	9	9 A5.2|9 24.84 cM	lysine (K)-specific methyltransferase 2A	mmu00310(Lysine degradation)//mmu05202(Transcriptional misregulation in cancer)	GO:0005654(nucleoplasm)//GO:0035097(histone methyltransferase complex)//GO:0005634(nucleus)//GO:0071339(MLL1 complex)//GO:0005737(cytoplasm)	GO:0018024(histone-lysine N-methyltransferase activity)//GO:0008270(zinc ion binding)//GO:0042800(histone methyltransferase activity (H3-K4 specific))//GO:0042803(protein homodimerization activity)//GO:0003682(chromatin binding)//GO:0042802(identical protein binding)//GO:0044212(transcription regulatory region DNA binding)//GO:0045322(unmethylated CpG binding)//GO:0008168(methyltransferase activi…	GO:2000615(regulation of histone H3-K9 acetylation)//GO:0032922(circadian regulation of gene expression)//GO:0016568(chromatin modification)//GO:0008542(visual learning)//GO:0048511(rhythmic process)//GO:0008285(negative regulation of cell proliferation)//GO:0050890(cognition)//GO:0006461(protein complex assembly)//GO:0045893(positive regulation of transcription, DNA-templated)//GO:0051569(regula…
Cd3g	ENSMUSG00000002033	protein_coding	-	chr9:44969571-44980431	0.407552	0.0834047	4.88643	2.28878	1	1	up	0.810924	0.411732	0	0	0.250214	0	12502	Ctg-3|Ctg3|T3g	MGI:MGI:88333|Ensembl:ENSMUSG00000002033|Vega:OTTMUSG00000034601	9	9 A5.2|9 24.84 cM	CD3 antigen, gamma polypeptide	mmu04640(Hematopoietic cell lineage)//mmu04660(T cell receptor signaling pathway)//mmu05142(Chagas disease (American trypanosomiasis))//mmu05162(Measles)//mmu05166(HTLV-I infection)	GO:0016020(membrane)//GO:0016021(integral component of membrane)//GO:0042105(alpha-beta T cell receptor complex)	GO:0046982(protein heterodimerization activity)//GO:0005515(protein binding)//GO:0004888(transmembrane signaling receptor activity)	GO:0070228(regulation of lymphocyte apoptotic process)//GO:0007163(establishment or maintenance of cell polarity)//GO:0015031(protein transport)//GO:0007166(cell surface receptor signaling pathway)
Supt6	ENSMUSG00000002052	protein_coding	-	chr11:78206745-78255496	6.98871	6.52177	1.0716	0.0997624	0.6855	0.999241	up	6.77069	7.02909	7.16635	5.33441	6.59104	7.63986	20926	5131400N11Rik|AI132449|SPT6|Supt6h|mKIAA0162	MGI:MGI:107726|Ensembl:ENSMUSG00000002052|Vega:OTTMUSG00000000107	11	11 B5|11 46.74 cM	suppressor of Ty 6		GO:0005634(nucleus)	GO:0044822(poly(A) RNA binding)//GO:0042393(histone binding)//GO:0003676(nucleic acid binding)//GO:0005515(protein binding)//GO:0003677(DNA binding)	GO:0050684(regulation of mRNA processing)//GO:0008380(RNA splicing)//GO:0051028(mRNA transport)//GO:0010793(regulation of mRNA export from nucleus)//GO:0006351(transcription, DNA-templated)//GO:0045191(regulation of isotype switching)//GO:0061086(negative regulation of histone H3-K27 methylation)//GO:0006397(mRNA processing)//GO:0032784(regulation of DNA-templated transcription, elongation)//GO:0…
Foxn1	ENSMUSG00000002057	protein_coding	-	chr11:78357576-78386558	0	0	1	0	1	1	up	0	0	0	0	0	0	15218	D11Bhm185e|Fkh19|HFH-11|Hfh11|Whn|nu|nude	MGI:MGI:102949|Ensembl:ENSMUSG00000002057|Vega:OTTMUSG00000000142	11	11 B5|11 46.74 cM	forkhead box N1		GO:0005634(nucleus)	GO:0000981(RNA polymerase II transcription factor activity, sequence-specific DNA binding)//GO:0003677(DNA binding)//GO:0043565(sequence-specific DNA binding)//GO:0003700(transcription factor activity, sequence-specific DNA binding)	GO:0033081(regulation of T cell differentiation in thymus)//GO:0051798(positive regulation of hair follicle development)//GO:0030097(hemopoiesis)//GO:0048514(blood vessel morphogenesis)//GO:0002360(T cell lineage commitment)//GO:0030216(keratinocyte differentiation)//GO:0006351(transcription, DNA-templated)//GO:0001942(hair follicle development)//GO:0097536(thymus epithelium morphogenesis)//GO:00…
Ccne1	ENSMUSG00000002068	protein_coding	-	chr7:38097983-38107534	0.237543	0.113008	2.102	1.07176	1	1	up	0.28157	0.129795	0.301263	0.0416997	0.14856	0.148766	12447	AW538188|CycE1	MGI:MGI:88316|Ensembl:ENSMUSG00000002068|Vega:OTTMUSG00000022262	7	7 B2|7 25.35 cM	cyclin E1	mmu04110(Cell cycle)//mmu04114(Oocyte meiosis)//mmu04115(p53 signaling pathway)//mmu04151(PI3K-Akt signaling pathway)//mmu05161(Hepatitis B)//mmu05162(Measles)//mmu05200(Pathways in cancer)//mmu05203(Viral carcinogenesis)//mmu05206(MicroRNAs in cancer)//mmu05215(Prostate cancer)//mmu05222(Small cell lung cancer)	GO:0000307(cyclin-dependent protein kinase holoenzyme complex)//GO:0097134(cyclin E1-CDK2 complex)//GO:0005813(centrosome)//GO:0005654(nucleoplasm)//GO:0005634(nucleus)//GO:0005737(cytoplasm)	GO:0019901(protein kinase binding)//GO:0016538(cyclin-dependent protein serine/threonine kinase regulator activity)//GO:0016301(kinase activity)//GO:0005515(protein binding)//GO:0032403(protein complex binding)	GO:0006468(protein phosphorylation)//GO:0051301(cell division)//GO:0051726(regulation of cell cycle)//GO:0000082(G1/S transition of mitotic cell cycle)//GO:0045597(positive regulation of cell differentiation)//GO:0007049(cell cycle)//GO:0006270(DNA replication initiation)//GO:0016055(Wnt signaling pathway)
Hsf2bp	ENSMUSG00000002076	protein_coding	-	chr17:31944768-32034508	0.340994	0.256441	1.32972	0.411122	1	1	up	0.357016	0.560699	0.105268	0.0285356	0.537275	0.203512	74377	4932437G14Rik	MGI:MGI:1921627|Ensembl:ENSMUSG00000002076|Vega:OTTMUSG00000031368	17	17|17 B1	heat shock transcription factor 2 binding protein		GO:0005829(cytosol)	GO:0005515(protein binding)	GO:0006366(transcription from RNA polymerase II promoter)//GO:0007283(spermatogenesis)//GO:0098779(mitophagy in response to mitochondrial depolarization)
Bbc3	ENSMUSG00000002083	protein_coding	+	chr7:16309615-16318205	0.17649	0.0957113	1.84398	0.882826	1	1	up	0	0.238361	0.291109	0	0.287134	0	170770	PUMA|PUMA/JFY1	MGI:MGI:2181667|Ensembl:ENSMUSG00000002083|Vega:OTTMUSG00000022267	7	7|7 A2	BCL2 binding component 3	mmu04115(p53 signaling pathway)//mmu04390(Hippo signaling pathway)//mmu05016(Huntington's disease)//mmu05162(Measles)	GO:0005740(mitochondrial envelope)//GO:0005739(mitochondrion)//GO:0005764(lysosome)	GO:0005515(protein binding)//GO:0001948(glycoprotein binding)//GO:0051117(ATPase binding)	GO:0034976(response to endoplasmic reticulum stress)//GO:0045926(negative regulation of growth)//GO:0008340(determination of adult lifespan)//GO:0006974(cellular response to DNA damage stimulus)//GO:0043065(positive regulation of apoptotic process)//GO:0043525(positive regulation of neuron apoptotic process)//GO:0072332(intrinsic apoptotic signaling pathway by p53 class mediator)//GO:2001056(posi…
Mybpc3	ENSMUSG00000002100	protein_coding	+	chr2:91118143-91136516	0	0	1	0	1	1	up	0	0	0	0	0	0	17868	-	MGI:MGI:102844|Ensembl:ENSMUSG00000002100|Vega:OTTMUSG00000014369	2	2|2 E1	myosin binding protein C, cardiac	mmu05410(Hypertrophic cardiomyopathy (HCM))//mmu05414(Dilated cardiomyopathy)	GO:0031672(A band)//GO:0030016(myofibril)//GO:0030017(sarcomere)//GO:0005863(striated muscle myosin thick filament)//GO:0005856(cytoskeleton)//GO:0032982(myosin filament)	GO:0008307(structural constituent of muscle)//GO:0005200(structural constituent of cytoskeleton)//GO:0003779(actin binding)//GO:0042802(identical protein binding)//GO:0017022(myosin binding)//GO:0046872(metal ion binding)//GO:0005515(protein binding)//GO:0032036(myosin heavy chain binding)	GO:0031034(myosin filament assembly)//GO:0002027(regulation of heart rate)//GO:0003007(heart morphogenesis)//GO:0006936(muscle contraction)//GO:0007155(cell adhesion)//GO:0008016(regulation of heart contraction)//GO:0060048(cardiac muscle contraction)//GO:0055010(ventricular cardiac muscle tissue morphogenesis)//GO:0045214(sarcomere organization)
Acp2	ENSMUSG00000002103	protein_coding	+	chr2:91202884-91236982	4.88786	4.44536	1.09954	0.136903	0.53105	0.999241	up	5.02085	5.11869	4.52403	4.13453	4.851	4.35053	11432	Acp-2|LAP	MGI:MGI:87882|Ensembl:ENSMUSG00000002103|Vega:OTTMUSG00000014413	2	2 E1|2 50.54 cM	acid phosphatase 2, lysosomal	mmu04142(Lysosome)	GO:0005764(lysosome)//GO:0070062(extracellular exosome)//GO:0043005(neuron projection)//GO:0016020(membrane)//GO:0016021(integral component of membrane)//GO:0031410(cytoplasmic vesicle)	GO:0003993(acid phosphatase activity)//GO:0001784(phosphotyrosine binding)//GO:0016787(hydrolase activity)//GO:0004721(phosphoprotein phosphatase activity)	GO:0001501(skeletal system development)//GO:0048102(autophagic cell death)//GO:0010033(response to organic substance)//GO:0007040(lysosome organization)
Rapsn	ENSMUSG00000002104	protein_coding	+	chr2:91035619-91053933	4.00835	3.43742	1.16609	0.221681	0.41275	0.999241	up	3.68888	4.64399	3.69216	3.00738	3.31197	3.99291	19400	43kDa|Nraps|Raps|rapsyn	MGI:MGI:99422|Ensembl:ENSMUSG00000002104|Vega:OTTMUSG00000014338	2	2 E1|2 50.44 cM	receptor-associated protein of the synapse		GO:0005886(plasma membrane)//GO:0016020(membrane)//GO:0005794(Golgi apparatus)//GO:0045211(postsynaptic membrane)//GO:0045202(synapse)//GO:0030054(cell junction)//GO:0031594(neuromuscular junction)//GO:0005856(cytoskeleton)//GO:0005737(cytoplasm)	GO:0043495(protein anchor)//GO:0033130(acetylcholine receptor binding)//GO:0008270(zinc ion binding)//GO:0035255(ionotropic glutamate receptor binding)//GO:0046872(metal ion binding)	GO:0043525(positive regulation of neuron apoptotic process)//GO:0007268(chemical synaptic transmission)//GO:0007271(synaptic transmission, cholinergic)//GO:1901626(regulation of postsynaptic membrane organization)//GO:0071340(skeletal muscle acetylcholine-gated channel clustering)//GO:1900075(positive regulation of neuromuscular synaptic transmission)
Celf2	ENSMUSG00000002107	protein_coding	-	chr2:6539693-7509563	14.0537	11.6837	1.20285	0.266453	0.15665	0.999241	up	13.9708	14.6608	13.5295	6.75274	11.9129	16.3854	14007	B230218O03|B230345P09Rik|C88023|CELF-2|CUG-BP2|Cugbp2|D230046B21Rik|Etr-3|Napor|Napor-2|mETR-3	MGI:MGI:1338822|Ensembl:ENSMUSG00000002107|Vega:OTTMUSG00000011788	2	2|2 A2-A3	CUGBP, Elav-like family member 2		GO:0005634(nucleus)//GO:0005737(cytoplasm)	GO:0044822(poly(A) RNA binding)//GO:0000166(nucleotide binding)//GO:0003676(nucleic acid binding)//GO:0003723(RNA binding)	GO:0006397(mRNA processing)//GO:0006376(mRNA splice site selection)
Ddb2	ENSMUSG00000002109	protein_coding	-	chr2:91202884-91236982	2.16508	1.64549	1.31576	0.395898	0.4777	0.999241	up	1.9394	2.64213	1.9137	1.42811	1.46178	2.04659	107986	2610043A19Rik	MGI:MGI:1355314|Ensembl:ENSMUSG00000002109|Vega:OTTMUSG00000014414	2	2|2 E1	damage specific DNA binding protein 2	mmu03420(Nucleotide excision repair)//mmu04115(p53 signaling pathway)//mmu04120(Ubiquitin mediated proteolysis)//mmu05161(Hepatitis B)	GO:0031465(Cul4B-RING E3 ubiquitin ligase complex)//GO:0043234(protein complex)//GO:0080008(Cul4-RING E3 ubiquitin ligase complex)//GO:0030054(cell junction)//GO:0005654(nucleoplasm)//GO:0005634(nucleus)	GO:0004842(ubiquitin-protein transferase activity)//GO:0003684(damaged DNA binding)//GO:0003677(DNA binding)	GO:0070914(UV-damage excision repair)//GO:0006974(cellular response to DNA damage stimulus)//GO:0051865(protein autoubiquitination)//GO:0035518(histone H2A monoubiquitination)//GO:0006290(pyrimidine dimer repair)//GO:0000209(protein polyubiquitination)//GO:0006281(DNA repair)//GO:0009411(response to UV)
Spi1	ENSMUSG00000002111	protein_coding	+	chr2:91082389-91115756	0.691915	0.6474	1.06876	0.0959387	1	1	up	0.647485	0.911722	0.516539	0.715994	0.634895	0.591311	20375	Dis-1|Dis1|PU.1|Sfpi-1|Sfpi1|Spi-1|Tcfpu1|Tfpu.1	MGI:MGI:98282|Ensembl:ENSMUSG00000002111|Vega:OTTMUSG00000014371	2	2 50.44 cM|2 E3	spleen focus forming virus (SFFV) proviral integration oncogene	mmu04380(Osteoclast differentiation)//mmu05166(HTLV-I infection)//mmu05169(Epstein-Barr virus infection)//mmu05200(Pathways in cancer)//mmu05202(Transcriptional misregulation in cancer)//mmu05221(Acute myeloid leukemia)	GO:0005667(transcription factor complex)//GO:0005634(nucleus)//GO:0000790(nuclear chromatin)	GO:0051525(NFAT protein binding)//GO:0003677(DNA binding)//GO:0003700(transcription factor activity, sequence-specific DNA binding)//GO:0003723(RNA binding)//GO:0000979(RNA polymerase II core promoter sequence-specific DNA binding)//GO:0000978(RNA polymerase II core promoter proximal region sequence-specific DNA binding)//GO:0005515(protein binding)//GO:0001078(transcriptional repressor activity,…	GO:0045347(negative regulation of MHC class II biosynthetic process)//GO:0030218(erythrocyte differentiation)//GO:1902895(positive regulation of pri-miRNA transcription from RNA polymerase II promoter)//GO:0000122(negative regulation of transcription from RNA polymerase II promoter)//GO:1902262(apoptotic process involved in patterning of blood vessels)//GO:0045893(positive regulation of transcrip…
Stat6	ENSMUSG00000002147	protein_coding	+	chr10:127642985-127701049	3.98127	3.55862	1.11877	0.161912	0.5361	0.999241	up	4.57381	3.9943	3.37571	3.16778	4.02665	3.48143	20852	-	MGI:MGI:103034|Ensembl:ENSMUSG00000002147|Vega:OTTMUSG00000031818	10	10 D3|10 74.59 cM	signal transducer and activator of transcription 6	mmu04630(Jak-STAT signaling pathway)//mmu05161(Hepatitis B)//mmu05321(Inflammatory bowel disease (IBD))	GO:0005654(nucleoplasm)//GO:0005634(nucleus)//GO:0045121(membrane raft)//GO:0005737(cytoplasm)//GO:0000790(nuclear chromatin)	GO:0019903(protein phosphatase binding)//GO:0003700(transcription factor activity, sequence-specific DNA binding)//GO:0043565(sequence-specific DNA binding)//GO:0000979(RNA polymerase II core promoter sequence-specific DNA binding)//GO:0042802(identical protein binding)//GO:0003677(DNA binding)	GO:0060443(mammary gland morphogenesis)//GO:0034097(response to cytokine)//GO:0002829(negative regulation of type 2 immune response)//GO:0070301(cellular response to hydrogen peroxide)//GO:0048295(positive regulation of isotype switching to IgE isotypes)//GO:0006351(transcription, DNA-templated)//GO:0042127(regulation of cell proliferation)//GO:0033598(mammary gland epithelial cell proliferation)…
Vrk3	ENSMUSG00000002205	protein_coding	+	chr7:44731480-44777515	8.22958	7.20172	1.14272	0.192478	0.56715	0.999241	up	7.90148	8.61818	8.16909	6.49024	7.49695	7.61796	101568	AI428238	MGI:MGI:2182465|Ensembl:ENSMUSG00000002205|Vega:OTTMUSG00000022259	7	7|7 B4	vaccinia related kinase 3		GO:0005634(nucleus)//GO:0005737(cytoplasm)	GO:0004672(protein kinase activity)//GO:0000166(nucleotide binding)//GO:0019903(protein phosphatase binding)//GO:0004674(protein serine/threonine kinase activity)//GO:0005524(ATP binding)	GO:0032516(positive regulation of phosphoprotein phosphatase activity)//GO:0006468(protein phosphorylation)//GO:0070373(negative regulation of ERK1 and ERK2 cascade)//GO:0018105(peptidyl-serine phosphorylation)//GO:0008360(regulation of cell shape)
Rmnd5a	ENSMUSG00000002222	protein_coding	-	chr6:71388633-71440637	59.6951	43.8605	1.36102	0.444689	0.07685	0.999241	up	62.9912	55.3017	60.7925	30.8846	46.2075	54.4895	68477	1110007A06Rik|AJ237586|AW125795|Gid2|MTA.D02.090	MGI:MGI:1915727|Ensembl:ENSMUSG00000002222|Vega:OTTMUSG00000023427	6	6|6 C1	required for meiotic nuclear division 5 homolog A		GO:0005575(cellular_component)	GO:0003674(molecular_function)	GO:0008150(biological_process)
Mov10	ENSMUSG00000002227	protein_coding	-	chr3:104794835-104818563	0.377158	0.162055	2.32735	1.21869	1	1	up	0.756313	0.219431	0.155729	0.117321	0.131675	0.237167	17454	C77703|Mov-10	MGI:MGI:97054|Ensembl:ENSMUSG00000002227|Vega:OTTMUSG00000022217	3	3|3 F2	Moloney leukemia virus 10		GO:0000932(cytoplasmic mRNA processing body)//GO:0005615(extracellular space)//GO:0005737(cytoplasm)	GO:0005524(ATP binding)//GO:0003723(RNA binding)//GO:0004386(helicase activity)//GO:0000166(nucleotide binding)//GO:0044822(poly(A) RNA binding)//GO:0016787(hydrolase activity)	GO:0031047(gene silencing by RNA)//GO:0035195(gene silencing by miRNA)//GO:0035279(mRNA cleavage involved in gene silencing by miRNA)
Ppm1j	ENSMUSG00000002228	protein_coding	+	chr3:104767405-104786018	8.27479	7.64317	1.08264	0.114551	0.64555	0.999241	up	8.11255	8.18834	8.52347	6.56189	7.03702	9.33061	71887	2310008J22Rik|PP2Czeta|Ppp2cz	MGI:MGI:1919137|Ensembl:ENSMUSG00000002228|Vega:OTTMUSG00000029325	3	3|3 F3	protein phosphatase 1J			GO:0003824(catalytic activity)//GO:0004722(protein serine/threonine phosphatase activity)//GO:0005515(protein binding)//GO:0016787(hydrolase activity)//GO:0004721(phosphoprotein phosphatase activity)	GO:0006470(protein dephosphorylation)
Rhoc	ENSMUSG00000002233	protein_coding	+	chr3:104789010-104794459	12.2794	11.4793	1.0697	0.0972011	0.6714	0.999241	up	11.5554	13.5504	11.7324	12.2675	12.5151	9.65537	11853	AI324259|Arh9|Arhc	MGI:MGI:106028|Ensembl:ENSMUSG00000002233|Vega:OTTMUSG00000022218	3	3|3 F2.2	ras homolog family member C		GO:0005886(plasma membrane)//GO:0070062(extracellular exosome)//GO:0016020(membrane)//GO:0005829(cytosol)//GO:0005634(nucleus)//GO:0032154(cleavage furrow)	GO:0000166(nucleotide binding)//GO:0005515(protein binding)//GO:0005525(GTP binding)//GO:0004871(signal transducer activity)	GO:0060193(positive regulation of lipase activity)//GO:0043123(positive regulation of I-kappaB kinase/NF-kappaB signaling)//GO:0000910(cytokinesis)//GO:0043297(apical junction assembly)//GO:0007264(small GTPase mediated signal transduction)
Tead3	ENSMUSG00000002249	protein_coding	-	chr17:28331670-28350805	2.06203	1.98842	1.03702	0.0524449	0.9226	0.999241	up	1.12398	2.85862	2.2035	1.84304	2.39455	1.72767	21678	DTEF-1|ETFR-1|TEAD-3|TEF-5|Tcf13r2	MGI:MGI:109241|Ensembl:ENSMUSG00000002249|Vega:OTTMUSG00000024245	17	17 A3.3|17 14.66 cM	TEA domain family member 3	mmu04390(Hippo signaling pathway)	GO:0005667(transcription factor complex)//GO:0005634(nucleus)	GO:0001085(RNA polymerase II transcription factor binding)//GO:0003677(DNA binding)//GO:0003700(transcription factor activity, sequence-specific DNA binding)	GO:0035329(hippo signaling)//GO:0006351(transcription, DNA-templated)//GO:0045944(positive regulation of transcription from RNA polymerase II promoter)//GO:0055059(asymmetric neuroblast division)//GO:0006355(regulation of transcription, DNA-templated)//GO:1902459(positive regulation of stem cell population maintenance)
Def6	ENSMUSG00000002257	protein_coding	+	chr17:28207777-28228608	0.337825	0.21579	1.56552	0.646646	1	1	up	0.220426	0.311207	0.481843	0.109029	0.271611	0.266731	23853	2410003F05Rik|6430538D02Rik|AV094905|Ibp|Slat|Slat2|Slat6	MGI:MGI:1346328|Ensembl:ENSMUSG00000002257|Vega:OTTMUSG00000023387	17	17|17 A3.3	differentially expressed in FDCP 6		GO:0005886(plasma membrane)//GO:0016020(membrane)//GO:0042995(cell projection)//GO:0005737(cytoplasm)//GO:0005634(nucleus)//GO:0005856(cytoskeleton)//GO:0005911(cell-cell junction)	GO:0005515(protein binding)
Peg3	ENSMUSG00000002265	protein_coding	-	chr7:6703891-6730421	3.70217	3.17238	1.167	0.222804	0.28875	0.999241	up	3.13018	3.41663	4.5597	2.31223	5.28359	1.92133	18616	AL022617|ASF-1|End4|Gcap4|Pw1|Zfp102|mKIAA0287	MGI:MGI:104748|Ensembl:ENSMUSG00000002265|Vega:OTTMUSG00000022283	7	7 3.89 cM|7 A2-B1	paternally expressed 3		GO:0005654(nucleoplasm)//GO:0005634(nucleus)//GO:0005737(cytoplasm)//GO:0005776(autophagosome)	GO:0003676(nucleic acid binding)//GO:0046872(metal ion binding)	GO:0006915(apoptotic process)//GO:0010468(regulation of gene expression)//GO:0000122(negative regulation of transcription from RNA polymerase II promoter)//GO:0045944(positive regulation of transcription from RNA polymerase II promoter)
Zim1	ENSMUSG00000002266	protein_coding	-	chr7:6675442-6696450	0.786349	0.488312	1.61034	0.687368	0.0836	0.999241	up	0.9656	0.615938	0.777509	0.273959	0.329194	0.861782	22776	-	MGI:MGI:1341879|Ensembl:ENSMUSG00000002266|Vega:OTTMUSG00000027111	7	7 A1|7 3.87 cM	zinc finger, imprinted 1			GO:0003700(transcription factor activity, sequence-specific DNA binding)	GO:0006355(regulation of transcription, DNA-templated)
Metrn	ENSMUSG00000002274	protein_coding	-	chr17:25794570-25985706	4.67284	4.51445	1.03508	0.049749	0.971	0.999241	up	4.7223	5.46597	3.83023	4.88539	4.62011	4.03784	70083	1810034B16Rik|Hyrac	MGI:MGI:1917333|Ensembl:ENSMUSG00000002274	17	17|17 A3.3	meteorin, glial cell differentiation regulator		GO:0005576(extracellular region)//GO:0005615(extracellular space)	GO:0003674(molecular_function)	GO:0007399(nervous system development)//GO:0050772(positive regulation of axonogenesis)//GO:0007275(multicellular organism development)//GO:0030154(cell differentiation)//GO:0010001(glial cell differentiation)
Lmf1	ENSMUSG00000002279	protein_coding	+	chr17:25579173-25662826	2.14313	2.10757	1.01688	0.0241448	0.95175	0.999241	up	2.05987	1.10057	3.26897	1.95641	2.714	1.65229	76483	2400010G15Rik|AW822050|Tmem112|cld	MGI:MGI:1923733|Ensembl:ENSMUSG00000002279|Vega:OTTMUSG00000031244	17	17 A3.3|17 12.7 cM	lipase maturation factor 1		GO:0005783(endoplasmic reticulum)//GO:0016020(membrane)//GO:0016021(integral component of membrane)//GO:0005789(endoplasmic reticulum membrane)	GO:0005515(protein binding)	GO:0033578(protein glycosylation in Golgi)//GO:0090207(regulation of triglyceride metabolic process)//GO:0009306(protein secretion)//GO:0051604(protein maturation)//GO:0051006(positive regulation of lipoprotein lipase activity)//GO:0034382(chylomicron remnant clearance)//GO:0090181(regulation of cholesterol metabolic process)//GO:0006888(ER to Golgi vesicle-mediated transport)
Dbf4	ENSMUSG00000002297	protein_coding	-	chr5:8396972-8422716	0.46643	0.444218	1.05	0.0703943	1	1	up	0.178595	0.673955	0.546741	0.238147	0.348028	0.74648	27214	AA545217|Ask	MGI:MGI:1351328|Ensembl:ENSMUSG00000002297|Vega:OTTMUSG00000035269	5	5|5 A2	DBF4 zinc finger	mmu04110(Cell cycle)	GO:0005634(nucleus)	GO:0003676(nucleic acid binding)//GO:0008270(zinc ion binding)//GO:0004674(protein serine/threonine kinase activity)//GO:0046872(metal ion binding)	GO:0007049(cell cycle)//GO:0007089(traversing start control point of mitotic cell cycle)//GO:0006260(DNA replication)
Daxx	ENSMUSG00000002307	protein_coding	+	chr17:33909413-33915589	3.38114	3.28447	1.02943	0.0418483	0.88305	0.999241	up	3.62826	3.32427	3.1909	3.64251	2.95633	3.25459	13163	-	MGI:MGI:1197015|Ensembl:ENSMUSG00000002307|Vega:OTTMUSG00000037068	17	17 B1|17 17.98 cM	Fas death domain-associated protein	mmu04010(MAPK signaling pathway)//mmu05014(Amyotrophic lateral sclerosis (ALS))//mmu05168(Herpes simplex infection)	GO:0000792(heterochromatin)//GO:0005874(microtubule)//GO:0005938(cell cortex)//GO:0001741(XY body)//GO:0005694(chromosome)//GO:0005829(cytosol)//GO:0043005(neuron projection)//GO:0016605(PML body)//GO:0044297(cell body)//GO:0005634(nucleus)//GO:0070603(SWI/SNF superfamily-type complex)//GO:0000775(chromosome, centromeric region)//GO:0005737(cytoplasm)	GO:0030295(protein kinase activator activity)//GO:0019894(kinesin binding)//GO:0019901(protein kinase binding)//GO:0019899(enzyme binding)//GO:0047485(protein N-terminus binding)//GO:0042393(histone binding)//GO:0008432(JUN kinase binding)//GO:0031625(ubiquitin protein ligase binding)//GO:0008134(transcription factor binding)//GO:0003714(transcription corepressor activity)//GO:0050681(androgen re…	GO:0000122(negative regulation of transcription from RNA polymerase II promoter)//GO:0016568(chromatin modification)//GO:0097190(apoptotic signaling pathway)//GO:0043066(negative regulation of apoptotic process)//GO:0031396(regulation of protein ubiquitination)//GO:0030521(androgen receptor signaling pathway)//GO:0006915(apoptotic process)//GO:0043065(positive regulation of apoptotic process)//GO…
Ipo4	ENSMUSG00000002319	protein_coding	-	chr14:55625399-55646352	11.3726	10.1066	1.12527	0.170269	0.7247	0.999241	up	7.80418	10.0186	16.2952	8.47599	11.6814	10.1624	75751	8430408O15Rik|AA409693|Imp4a|RanBP4	MGI:MGI:1923001|Ensembl:ENSMUSG00000002319|Vega:OTTMUSG00000027877	14	14 C3|14 28.19 cM	importin 4		GO:0034399(nuclear periphery)//GO:0000790(nuclear chromatin)//GO:0031965(nuclear membrane)//GO:0016020(membrane)//GO:0043234(protein complex)//GO:0005634(nucleus)//GO:0005737(cytoplasm)	GO:0008139(nuclear localization sequence binding)//GO:0005515(protein binding)//GO:0008565(protein transporter activity)//GO:0008536(Ran GTPase binding)	GO:0000060(protein import into nucleus, translocation)//GO:0006335(DNA replication-dependent nucleosome assembly)//GO:0006336(DNA replication-independent nucleosome assembly)//GO:0015031(protein transport)//GO:0042254(ribosome biogenesis)//GO:0006886(intracellular protein transport)//GO:0006607(NLS-bearing protein import into nucleus)//GO:0006810(transport)//GO:0006610(ribosomal protein import in…
Rec8	ENSMUSG00000002324	protein_coding	+	chr14:55618036-55625395	0.0565498	0.0253208	2.23334	1.1592	1	1	up	0	0.169649	0	0.0759623	0	0	56739	Rec8L1|mrec	MGI:MGI:1929645|Ensembl:ENSMUSG00000002324|Vega:OTTMUSG00000027876	14	14 C3|14 28.19 cM	REC8 meiotic recombination protein	mmu04114(Oocyte meiosis)	GO:0000794(condensed nuclear chromosome)//GO:0000800(lateral element)//GO:0000795(synaptonemal complex)//GO:0030893(meiotic cohesin complex)//GO:0000780(condensed nuclear chromosome, centromeric region)//GO:0001673(male germ cell nucleus)//GO:0000228(nuclear chromosome)//GO:0005694(chromosome)//GO:0005634(nucleus)//GO:0034991(nuclear meiotic cohesin complex)//GO:0000778(condensed nuclear chromoso…	GO:0005515(protein binding)	GO:0001556(oocyte maturation)//GO:0009566(fertilization)//GO:0007286(spermatid development)//GO:0007126(meiotic nuclear division)//GO:0000724(double-strand break repair via homologous recombination)//GO:0007130(synaptonemal complex assembly)//GO:0007141(male meiosis I)//GO:0051321(meiotic cell cycle)//GO:0007129(synapsis)//GO:0007059(chromosome segregation)//GO:0072520(seminiferous tubule develop…
Irf9	ENSMUSG00000002325	protein_coding	+	chr14:55591707-55610030	2.13845	2.02544	1.0558	0.0783341	0.82365	0.999241	up	2.70219	1.79205	1.92111	2.36939	1.80715	1.89977	16391	Irf-9|Isgf3g|p48	MGI:MGI:107587|Ensembl:ENSMUSG00000002325|Vega:OTTMUSG00000029027	14	14 C3|14 28.19 cM	interferon regulatory factor 9	mmu04380(Osteoclast differentiation)//mmu04630(Jak-STAT signaling pathway)//mmu05160(Hepatitis C)//mmu05162(Measles)//mmu05164(Influenza A)//mmu05168(Herpes simplex infection)//mmu05203(Viral carcinogenesis)	GO:0005634(nucleus)//GO:0005737(cytoplasm)	GO:0000975(regulatory region DNA binding)//GO:0001047(core promoter binding)//GO:0005515(protein binding)//GO:0003677(DNA binding)//GO:0003700(transcription factor activity, sequence-specific DNA binding)	GO:0045351(type I interferon biosynthetic process)//GO:0006351(transcription, DNA-templated)//GO:0006355(regulation of transcription, DNA-templated)
Ncan	ENSMUSG00000002341	protein_coding	-	chr8:70093084-70120873	0.00926454	0.00685514	1.35147	0.434534	1	1	up	0	0.0172794	0.0105143	0	0.0103724	0.0101931	13004	C230035B04|Cspg3|Cspg3-rs|Tgfbit	MGI:MGI:104694|Ensembl:ENSMUSG00000002341|Vega:OTTMUSG00000022194	8	8 B3.3|8 34.15 cM	neurocan		GO:0005578(proteinaceous extracellular matrix)//GO:0005576(extracellular region)	GO:0005201(extracellular matrix structural constituent)//GO:0030246(carbohydrate binding)//GO:0005540(hyaluronic acid binding)//GO:0005509(calcium ion binding)	GO:0001501(skeletal system development)//GO:0051823(regulation of synapse structural plasticity)//GO:0007155(cell adhesion)//GO:0007417(central nervous system development)
Slc25a42	ENSMUSG00000002346	protein_coding	-	chr8:70184339-70212305	4.90101	4.78868	1.02346	0.0334499	0.88435	0.999241	up	5.6946	4.42569	4.58274	5.58093	4.36172	4.4234	73095	2900084M01Rik	MGI:MGI:1920345|Ensembl:ENSMUSG00000002346|Vega:OTTMUSG00000022210	8	8|8 B3.3	solute carrier family 25, member 42		GO:0005739(mitochondrion)//GO:0005743(mitochondrial inner membrane)//GO:0005634(nucleus)//GO:0016021(integral component of membrane)//GO:0016020(membrane)	GO:0015217(ADP transmembrane transporter activity)//GO:0003735(structural constituent of ribosome)//GO:0005347(ATP transmembrane transporter activity)//GO:0015228(coenzyme A transmembrane transporter activity)//GO:0080122(AMP transmembrane transporter activity)//GO:0043262(adenosine-diphosphatase activity)	GO:0015866(ADP transport)//GO:0080121(AMP transport)//GO:0015860(purine nucleoside transmembrane transport)//GO:0006412(translation)//GO:0015867(ATP transport)//GO:1901679(nucleotide transmembrane transport)//GO:0055085(transmembrane transport)//GO:0006810(transport)//GO:0035349(coenzyme A transmembrane transport)
Snx9	ENSMUSG00000002365	protein_coding	+	chr17:5841327-5931033	8.60664	7.38931	1.16474	0.22001	0.29405	0.999241	up	9.18896	8.65816	7.97281	6.84337	7.12955	8.19503	66616	2700073N08Rik|SDP1|SH3PX1	MGI:MGI:1913866|Ensembl:ENSMUSG00000002365	17	17 A1|17 3.51 cM	sorting nexin 9		GO:0030136(clathrin-coated vesicle)//GO:0005768(endosome)//GO:0005886(plasma membrane)//GO:0070062(extracellular exosome)//GO:0030659(cytoplasmic vesicle membrane)//GO:0005802(trans-Golgi network)//GO:0016020(membrane)//GO:0005794(Golgi apparatus)//GO:0019898(extrinsic component of membrane)//GO:0016023(cytoplasmic, membrane-bounded vesicle)//GO:0031410(cytoplasmic vesicle)//GO:0042995(cell proje…	GO:0031625(ubiquitin protein ligase binding)//GO:0042803(protein homodimerization activity)//GO:0035091(phosphatidylinositol binding)//GO:0005545(1-phosphatidylinositol binding)//GO:0008289(lipid binding)//GO:0071933(Arp2/3 complex binding)//GO:0005515(protein binding)	GO:0006897(endocytosis)//GO:0007067(mitotic nuclear division)//GO:0060988(lipid tube assembly)//GO:0006898(receptor-mediated endocytosis)//GO:0045860(positive regulation of protein kinase activity)//GO:0051301(cell division)//GO:0016050(vesicle organization)//GO:0000281(mitotic cytokinesis)//GO:0032461(positive regulation of protein oligomerization)//GO:0043547(positive regulation of GTPase activ…
Bmp8b	ENSMUSG00000002384	protein_coding	+	chr4:123105164-123139951	0	0	1	0	1	1	up	0	0	0	0	0	0	12164	Op3	MGI:MGI:107335|Ensembl:ENSMUSG00000002384|Vega:OTTMUSG00000008937	4	4 D2.2|4 57.38 cM	bone morphogenetic protein 8b	mmu04350(TGF-beta signaling pathway)//mmu04390(Hippo signaling pathway)	GO:0005576(extracellular region)//GO:0005615(extracellular space)	GO:0070700(BMP receptor binding)//GO:0008083(growth factor activity)//GO:0005160(transforming growth factor beta receptor binding)//GO:0005125(cytokine activity)	GO:0030509(BMP signaling pathway)//GO:0051216(cartilage development)//GO:0010862(positive regulation of pathway-restricted SMAD protein phosphorylation)//GO:0048598(embryonic morphogenesis)//GO:0007281(germ cell development)//GO:0060395(SMAD protein signal transduction)//GO:0007283(spermatogenesis)//GO:0030154(cell differentiation)//GO:2000505(regulation of energy homeostasis)//GO:0001503(ossific…
Nr2f6	ENSMUSG00000002393	protein_coding	-	chr8:71371297-71381960	3.15264	2.40747	1.30952	0.389042	0.30475	0.999241	up	2.77473	3.60957	3.07363	2.62897	2.39983	2.19362	13864	AV090102|COUP-TF3|EAR2|Erbal2	MGI:MGI:1352453|Ensembl:ENSMUSG00000002393|Vega:OTTMUSG00000022854	8	8 B3.3|8 34.43 cM	nuclear receptor subfamily 2, group F, member 6		GO:0005634(nucleus)	GO:0008270(zinc ion binding)//GO:0001227(transcriptional repressor activity, RNA polymerase II transcription regulatory region sequence-specific binding)//GO:0003700(transcription factor activity, sequence-specific DNA binding)//GO:0005515(protein binding)//GO:0003707(steroid hormone receptor activity)//GO:0004879(RNA polymerase II transcription factor activity, ligand-activated sequence-specific…	GO:0043153(entrainment of circadian clock by photoperiod)//GO:0048666(neuron development)//GO:0006351(transcription, DNA-templated)//GO:0000122(negative regulation of transcription from RNA polymerase II promoter)//GO:0050965(detection of temperature stimulus involved in sensory perception of pain)//GO:0043401(steroid hormone mediated signaling pathway)//GO:0006355(regulation of transcription, DN…
Ocel1	ENSMUSG00000002396	protein_coding	+	chr8:71371297-71381960	0.864127	0.6149	1.40531	0.490892	0.4154	0.999241	up	1.0843	0.895111	0.612976	0.785885	0.596286	0.462528	77090	9430098E02Rik|AI326022|AI593544	MGI:MGI:1924340|Ensembl:ENSMUSG00000002396|Vega:OTTMUSG00000022215	8	8|8 C1	occludin/ELL domain containing 1		GO:0005575(cellular_component)	GO:0003674(molecular_function)	GO:0008150(biological_process)
Dyrk1b	ENSMUSG00000002409	protein_coding	+	chr7:28179468-28197469	5.83916	5.64252	1.03485	0.0494212	0.8492	0.999241	up	5.84448	5.37822	6.29479	4.63061	5.15461	7.14235	13549	Mirk	MGI:MGI:1330302|Ensembl:ENSMUSG00000002409|Vega:OTTMUSG00000037983	7	7|7 A3	dual-specificity tyrosine-(Y)-phosphorylation regulated kinase 1b		GO:0005634(nucleus)	GO:0004674(protein serine/threonine kinase activity)//GO:0004672(protein kinase activity)//GO:0004712(protein serine/threonine/tyrosine kinase activity)//GO:0000166(nucleotide binding)//GO:0016301(kinase activity)//GO:0004713(protein tyrosine kinase activity)//GO:0005524(ATP binding)//GO:0016740(transferase activity)//GO:0003713(transcription coactivator activity)	GO:0016310(phosphorylation)//GO:0006468(protein phosphorylation)//GO:0060612(adipose tissue development)//GO:0007520(myoblast fusion)//GO:0045893(positive regulation of transcription, DNA-templated)
Braf	ENSMUSG00000002413	protein_coding	-	chr6:39573872-39725463	1.95749	1.49694	1.30766	0.386984	0.4176	0.999241	up	2.13243	1.79611	1.94392	1.65892	1.27582	1.55609	109880	9930012E13Rik|AA120551|AA387315|AA473386|B-raf|Braf-2|Braf2|C230098H17|C87398|D6Ertd631e	MGI:MGI:88190|Ensembl:ENSMUSG00000002413|Vega:OTTMUSG00000035245	6	6 B1|6 18.43 cM	Braf transforming gene	mmu04010(MAPK signaling pathway)//mmu04012(ErbB signaling pathway)//mmu04015(Rap1 signaling pathway)//mmu04024(cAMP signaling pathway)//mmu04062(Chemokine signaling pathway)//mmu04068(FoxO signaling pathway)//mmu04150(mTOR signaling pathway)//mmu04270(Vascular smooth muscle contraction)//mmu04510(Focal adhesion)//mmu04650(Natural killer cell mediated cytotoxicity)//mmu04720(Long-term potentiation…	GO:0005886(plasma membrane)//GO:0043005(neuron projection)//GO:0016020(membrane)//GO:0043231(intracellular membrane-bounded organelle)//GO:0005739(mitochondrion)//GO:0044297(cell body)//GO:0005634(nucleus)//GO:0005737(cytoplasm)	GO:0004674(protein serine/threonine kinase activity)//GO:0004672(protein kinase activity)//GO:0031434(mitogen-activated protein kinase kinase binding)//GO:0046982(protein heterodimerization activity)//GO:0004709(MAP kinase kinase kinase activity)//GO:0042802(identical protein binding)//GO:0000166(nucleotide binding)//GO:0016301(kinase activity)//GO:0016740(transferase activity)//GO:0046872(metal …	GO:0060323(head morphogenesis)//GO:0016310(phosphorylation)//GO:0010628(positive regulation of gene expression)//GO:0008542(visual learning)//GO:0051591(response to cAMP)//GO:1900026(positive regulation of substrate adhesion-dependent cell spreading)//GO:0010764(negative regulation of fibroblast migration)//GO:0002318(myeloid progenitor cell differentiation)//GO:0043066(negative regulation of apo…
Hltf	ENSMUSG00000002428	protein_coding	+	chr3:20056574-20118490	2.15111	1.89053	1.13784	0.186292	0.573	0.999241	up	2.84788	1.88394	1.7215	2.2413	1.95384	1.47645	20585	AF010600|BC057116|P113|Smarca3|Snf2l3	MGI:MGI:1196437|Ensembl:ENSMUSG00000002428|Vega:OTTMUSG00000026001	3	3 A2|3 6.15 cM	helicase-like transcription factor		GO:0005654(nucleoplasm)//GO:0005634(nucleus)//GO:0005737(cytoplasm)//GO:0016020(membrane)	GO:0000978(RNA polymerase II core promoter proximal region sequence-specific DNA binding)//GO:0070739(protein-glutamic acid ligase activity)//GO:0016787(hydrolase activity)//GO:0003676(nucleic acid binding)//GO:0008270(zinc ion binding)//GO:0031625(ubiquitin protein ligase binding)//GO:0070737(protein-glycine ligase activity, elongating)//GO:0018169(ribosomal S6-glutamic acid ligase activity)//GO…	GO:0008152(metabolic process)//GO:0016568(chromatin modification)//GO:0006351(transcription, DNA-templated)//GO:0000209(protein polyubiquitination)//GO:0045944(positive regulation of transcription from RNA polymerase II promoter)//GO:0006301(postreplication repair)//GO:0006357(regulation of transcription from RNA polymerase II promoter)
Rgs19	ENSMUSG00000002458	protein_coding	-	chr2:181688418-181693977	1.48649	1.16324	1.27788	0.353758	0.47845	0.999241	up	1.14577	2.18757	1.12612	1.13978	1.17897	1.17097	56470	2610042F04Rik|AI324841|AW547781|GAIP	MGI:MGI:1915153|Ensembl:ENSMUSG00000002458|Vega:OTTMUSG00000016814	2	2 H4|2 103.72 cM	regulator of G-protein signaling 19		GO:0030136(clathrin-coated vesicle)//GO:0005886(plasma membrane)//GO:0005903(brush border)//GO:0005938(cell cortex)//GO:0030877(beta-catenin destruction complex)//GO:0016020(membrane)//GO:0014069(postsynaptic density)//GO:0045121(membrane raft)//GO:0016023(cytoplasmic, membrane-bounded vesicle)//GO:0005737(cytoplasm)//GO:0005881(cytoplasmic microtubule)	GO:0008013(beta-catenin binding)//GO:0019901(protein kinase binding)//GO:0001965(G-protein alpha-subunit binding)//GO:0070016(armadillo repeat domain binding)//GO:0005096(GTPase activator activity)//GO:0005515(protein binding)	GO:0008219(cell death)//GO:0035412(regulation of catenin import into nucleus)//GO:0009968(negative regulation of signal transduction)//GO:0090090(negative regulation of canonical Wnt signaling pathway)//GO:0030154(cell differentiation)//GO:0009950(dorsal/ventral axis specification)//GO:0090244(Wnt signaling pathway involved in somitogenesis)//GO:0071407(cellular response to organic cyclic compoun…
Rgs20	ENSMUSG00000002459	protein_coding	-	chr1:4909575-5070285	0.0136686	0	inf	inf	1	1	up	0.0410058	0	0	0	0	0	58175	2900073E09Rik|Rgsz1	MGI:MGI:1929866|Ensembl:ENSMUSG00000002459|Vega:OTTMUSG00000029338	1	1|1 A1	regulator of G-protein signaling 20		GO:0005938(cell cortex)//GO:0005886(plasma membrane)//GO:0005881(cytoplasmic microtubule)//GO:0005802(trans-Golgi network)//GO:0030877(beta-catenin destruction complex)//GO:0016020(membrane)//GO:0005794(Golgi apparatus)//GO:0014069(postsynaptic density)//GO:0016023(cytoplasmic, membrane-bounded vesicle)//GO:0005634(nucleus)//GO:0005737(cytoplasm)	GO:0019901(protein kinase binding)//GO:0005096(GTPase activator activity)//GO:0070016(armadillo repeat domain binding)//GO:0008013(beta-catenin binding)	GO:0008219(cell death)//GO:0035412(regulation of catenin import into nucleus)//GO:0009968(negative regulation of signal transduction)//GO:0090090(negative regulation of canonical Wnt signaling pathway)//GO:0030154(cell differentiation)//GO:0009950(dorsal/ventral axis specification)//GO:0090244(Wnt signaling pathway involved in somitogenesis)//GO:0071407(cellular response to organic cyclic compoun…
Tchp	ENSMUSG00000002486	protein_coding	+	chr5:114707759-114722327	0.800345	0.710817	1.12595	0.171144	0.66055	0.999241	up	0.669906	0.870078	0.861051	0.368945	0.981686	0.781821	77832	A930031F18Rik|AV279199	MGI:MGI:1925082|Ensembl:ENSMUSG00000002486|Vega:OTTMUSG00000014526	5	5|5 F	trichoplein, keratin filament binding		GO:0097539(ciliary transition fiber)//GO:0005886(plasma membrane)//GO:0016020(membrane)//GO:0045095(keratin filament)//GO:0030057(desmosome)//GO:0005813(centrosome)//GO:0005739(mitochondrion)//GO:0045179(apical cortex)//GO:0005856(cytoskeleton)//GO:0005737(cytoplasm)	GO:0003674(molecular_function)	GO:0006915(apoptotic process)//GO:1902018(negative regulation of cilium assembly)//GO:0030308(negative regulation of cell growth)//GO:0030030(cell projection organization)
Tiam1	ENSMUSG00000002489	protein_coding	-	chr16:89787110-89980080	2.10555	1.5063	1.39783	0.483191	0.11095	0.999241	up	1.57294	2.09669	2.64702	0.854951	1.1621	2.50184	21844	AI847750|D16Ium10|D16Ium10e	MGI:MGI:103306|Ensembl:ENSMUSG00000002489|Vega:OTTMUSG00000024287	16	16 C3-4|16 51.5 cM	T cell lymphoma invasion and metastasis 1	mmu04014(Ras signaling pathway)//mmu04015(Rap1 signaling pathway)//mmu04024(cAMP signaling pathway)//mmu04062(Chemokine signaling pathway)//mmu04810(Regulation of actin cytoskeleton)//mmu05205(Proteoglycans in cancer)	GO:0005886(plasma membrane)//GO:0044295(axonal growth cone)//GO:0005874(microtubule)//GO:0016020(membrane)//GO:0005829(cytosol)//GO:0045202(synapse)//GO:0044291(cell-cell contact zone)//GO:0060091(kinocilium)//GO:0030054(cell junction)//GO:0005737(cytoplasm)//GO:0044304(main axon)//GO:0032587(ruffle membrane)//GO:0036477(somatodendritic compartment)//GO:0005634(nucleus)//GO:0031234(extrinsic comp…	GO:0019900(kinase binding)//GO:0030971(receptor tyrosine kinase binding)//GO:0005515(protein binding)//GO:0030676(Rac guanyl-nucleotide exchange factor activity)//GO:0008289(lipid binding)//GO:0048365(Rac GTPase binding)//GO:0005085(guanyl-nucleotide exchange factor activity)//GO:0017016(Ras GTPase binding)//GO:0005089(Rho guanyl-nucleotide exchange factor activity)//GO:0046875(ephrin receptor bi…	GO:0010976(positive regulation of neuron projection development)//GO:0090630(activation of GTPase activity)//GO:0016601(Rac protein signal transduction)//GO:0061003(positive regulation of dendritic spine morphogenesis)//GO:0016477(cell migration)//GO:1990138(neuron projection extension)//GO:0050772(positive regulation of axonogenesis)//GO:0003300(cardiac muscle hypertrophy)//GO:1904268(positive r…
Tsc2	ENSMUSG00000002496	protein_coding	-	chr17:24549949-24632629	5.36227	4.83391	1.1093	0.149653	0.52515	0.999241	up	5.10245	5.20887	5.77549	4.07969	5.33676	5.08528	22084	Nafld|Tcs2	MGI:MGI:102548|Ensembl:ENSMUSG00000002496	17	17 A3.3|17 12.41 cM	tuberous sclerosis 2	mmu04072(Phospholipase D signaling pathway)//mmu04115(p53 signaling pathway)//mmu04150(mTOR signaling pathway)//mmu04151(PI3K-Akt signaling pathway)//mmu04152(AMPK signaling pathway)//mmu04211(Longevity regulating pathway - mammal)//mmu04910(Insulin signaling pathway)//mmu04919(Thyroid hormone signaling pathway)//mmu05231(Choline metabolism in cancer)	GO:0005764(lysosome)//GO:0048471(perinuclear region of cytoplasm)//GO:0033596(TSC1-TSC2 complex)//GO:0005901(caveola)//GO:0043005(neuron projection)//GO:0016020(membrane)//GO:0030425(dendrite)//GO:0043234(protein complex)//GO:0005829(cytosol)//GO:0043231(intracellular membrane-bounded organelle)//GO:0045121(membrane raft)//GO:0030426(growth cone)//GO:0005856(cytoskeleton)//GO:0005737(cytoplasm)//…	GO:0019902(phosphatase binding)//GO:0042803(protein homodimerization activity)//GO:0046982(protein heterodimerization activity)//GO:0031267(small GTPase binding)//GO:0005096(GTPase activator activity)//GO:0005515(protein binding)//GO:0071889(14-3-3 protein binding)	GO:0046626(regulation of insulin receptor signaling pathway)//GO:0051260(protein homooligomerization)//GO:0030030(cell projection organization)//GO:0045184(establishment of protein localization)//GO:0043407(negative regulation of MAP kinase activity)//GO:0032007(negative regulation of TOR signaling)//GO:0050918(positive chemotaxis)//GO:0008285(negative regulation of cell proliferation)//GO:004632…
Golga2	ENSMUSG00000002546	protein_coding	+	chr2:32278815-32307921	14.1377	11.841	1.19397	0.255763	0.61185	0.999241	up	13.757	11.5259	17.1303	8.38132	12.3304	14.8112	99412	AW555139|GM130|mKIAA4150	MGI:MGI:2139395|Ensembl:ENSMUSG00000002546|Vega:OTTMUSG00000012959	2	2|2 B	golgi autoantigen, golgin subfamily a, 2		GO:0032580(Golgi cisterna membrane)//GO:0005874(microtubule)//GO:0016020(membrane)//GO:0043025(neuronal cell body)//GO:0043234(protein complex)//GO:0005794(Golgi apparatus)//GO:0044431(Golgi apparatus part)//GO:0000137(Golgi cis cisterna)//GO:0005737(cytoplasm)//GO:0030134(ER to Golgi transport vesicle)//GO:0005634(nucleus)//GO:0072686(mitotic spindle)//GO:0005856(cytoskeleton)//GO:0005801(cis-Go…	GO:0032403(protein complex binding)//GO:0019901(protein kinase binding)//GO:0019905(syntaxin binding)//GO:0008017(microtubule binding)//GO:0061676(importin-alpha family protein binding)//GO:0005515(protein binding)	GO:0090161(Golgi ribbon formation)//GO:0010507(negative regulation of autophagy)//GO:0007067(mitotic nuclear division)//GO:0007020(microtubule nucleation)//GO:0090307(mitotic spindle assembly)//GO:0051645(Golgi localization)//GO:0060050(positive regulation of protein glycosylation)//GO:0090166(Golgi disassembly)//GO:0051225(spindle assembly)//GO:0051297(centrosome organization)//GO:0051301(cell d…
Uck1	ENSMUSG00000002550	protein_coding	-	chr2:32236589-32260159	4.09103	3.20527	1.27634	0.352017	0.4151	0.999241	up	5.13137	2.79132	4.3504	3.49791	3.24158	2.87633	22245	URK1|Umpk	MGI:MGI:98904|Ensembl:ENSMUSG00000002550|Vega:OTTMUSG00000012955	2	2|2 B	uridine-cytidine kinase 1	mmu00240(Pyrimidine metabolism)//mmu00983(Drug metabolism - other enzymes)//mmu01100(Metabolic pathways)	GO:0005829(cytosol)	GO:0005524(ATP binding)//GO:0019206(nucleoside kinase activity)//GO:0000166(nucleotide binding)//GO:0016301(kinase activity)//GO:0004849(uridine kinase activity)//GO:0016740(transferase activity)	GO:0016310(phosphorylation)//GO:0008152(metabolic process)//GO:0043097(pyrimidine nucleoside salvage)//GO:0006206(pyrimidine nucleobase metabolic process)
Tgfb1	ENSMUSG00000002603	protein_coding	+	chr7:25687001-25705077	1.80854	1.24708	1.45021	0.536263	0.1948	0.999241	up	1.89973	2.22064	1.30524	1.41149	0.952012	1.37775	21803	TGF-beta1|TGFbeta1|Tgfb|Tgfb-1	MGI:MGI:98725|Ensembl:ENSMUSG00000002603|Vega:OTTMUSG00000036027	7	7 A3|7 13.98 cM	transforming growth factor, beta 1	mmu04010(MAPK signaling pathway)//mmu04060(Cytokine-cytokine receptor interaction)//mmu04068(FoxO signaling pathway)//mmu04110(Cell cycle)//mmu04144(Endocytosis)//mmu04350(TGF-beta signaling pathway)//mmu04380(Osteoclast differentiation)//mmu04390(Hippo signaling pathway)//mmu04672(Intestinal immune network for IgA production)//mmu04932(Non-alcoholic fatty liver disease (NAFLD))//mmu04933(AGE-RAG…	GO:0005576(extracellular region)//GO:0009986(cell surface)//GO:0030424(axon)//GO:0043025(neuronal cell body)//GO:0005902(microvillus)//GO:0005578(proteinaceous extracellular matrix)//GO:0031012(extracellular matrix)//GO:0005634(nucleus)//GO:0072562(blood microparticle)//GO:0005615(extracellular space)//GO:0005737(cytoplasm)//GO:0030141(secretory granule)	GO:0008083(growth factor activity)//GO:0003823(antigen binding)//GO:0005125(cytokine activity)//GO:0042803(protein homodimerization activity)//GO:0005160(transforming growth factor beta receptor binding)//GO:0019899(enzyme binding)//GO:0046982(protein heterodimerization activity)//GO:0034713(type I transforming growth factor beta receptor binding)//GO:0005114(type II transforming growth factor be…	GO:0071363(cellular response to growth factor stimulus)//GO:0007183(SMAD protein complex assembly)//GO:0060965(negative regulation of gene silencing by miRNA)//GO:0051152(positive regulation of smooth muscle cell differentiation)//GO:2000727(positive regulation of cardiac muscle cell differentiation)//GO:0030217(T cell differentiation)//GO:0050714(positive regulation of protein secretion)//GO:003…
Akap8l	ENSMUSG00000002625	protein_coding	-	chr17:32321382-32350581	10.1868	9.75475	1.04429	0.0625258	0.75725	0.999241	up	10.0442	9.39334	11.1229	7.65899	11.3093	10.296	54194	HAP95|Nakap95	MGI:MGI:1860606|Ensembl:ENSMUSG00000002625	17	17|17 B2	A kinase (PRKA) anchor protein 8-like	mmu05169(Epstein-Barr virus infection)	GO:0016363(nuclear matrix)//GO:0016607(nuclear speck)//GO:0000785(chromatin)//GO:0005654(nucleoplasm)//GO:0005634(nucleus)//GO:0005737(cytoplasm)	GO:0042826(histone deacetylase binding)//GO:0044822(poly(A) RNA binding)//GO:0046872(metal ion binding)//GO:0017151(DEAD/H-box RNA helicase binding)//GO:0003677(DNA binding)//GO:0005521(lamin binding)	GO:0031065(positive regulation of histone deacetylation)//GO:0033127(regulation of histone phosphorylation)//GO:0010793(regulation of mRNA export from nucleus)//GO:0006351(transcription, DNA-templated)//GO:0051081(nuclear envelope disassembly)//GO:0045944(positive regulation of transcription from RNA polymerase II promoter)//GO:0044839(cell cycle G2/M phase transition)//GO:0006397(mRNA processing…
Shh	ENSMUSG00000002633	protein_coding	-	chr5:28456814-28933995	0.0316476	0.018653	1.69665	0.762686	1	1	up	0	0.0949429	0	0	0	0.0559591	20423	9530036O11Rik|Dsh|Hhg1|Hx|Hxl3|M100081	MGI:MGI:98297|Ensembl:ENSMUSG00000002633|Vega:OTTMUSG00000021299	5	5 B1|5 14.39 cM	sonic hedgehog	mmu04340(Hedgehog signaling pathway)//mmu05200(Pathways in cancer)//mmu05217(Basal cell carcinoma)	GO:0005886(plasma membrane)//GO:0005576(extracellular region)//GO:0009986(cell surface)//GO:0030133(transport vesicle)//GO:0016020(membrane)//GO:0030425(dendrite)//GO:0005794(Golgi apparatus)//GO:0005783(endoplasmic reticulum)//GO:0045121(membrane raft)//GO:0005578(proteinaceous extracellular matrix)//GO:0030424(axon)//GO:0005615(extracellular space)//GO:0043025(neuronal cell body)	GO:0008233(peptidase activity)//GO:0005113(patched binding)//GO:0008270(zinc ion binding)//GO:0043237(laminin-1 binding)//GO:0016787(hydrolase activity)//GO:0005539(glycosaminoglycan binding)//GO:0046872(metal ion binding)//GO:0005515(protein binding)//GO:0001948(glycoprotein binding)//GO:0005509(calcium ion binding)	GO:0033092(positive regulation of immature T cell proliferation in thymus)//GO:0048678(response to axon injury)//GO:0060783(mesenchymal smoothened signaling pathway involved in prostate gland development)//GO:0048706(embryonic skeletal system development)//GO:0048643(positive regulation of skeletal muscle tissue development)//GO:0030878(thyroid gland development)//GO:0030010(establishment of cell…
Pdcd2l	ENSMUSG00000002635	protein_coding	-	chr7:34184498-34196661	6.12441	5.76042	1.06319	0.0883965	0.8317	0.999241	up	5.06812	9.28799	4.01711	5.82073	5.43313	6.02739	68079	6030457N17Rik	MGI:MGI:1915329|Ensembl:ENSMUSG00000002635|Vega:OTTMUSG00000008373	7	7|7 B1	programmed cell death 2-like		GO:0016020(membrane)//GO:0005737(cytoplasm)	GO:0003674(molecular_function)	GO:0007049(cell cycle)//GO:0008150(biological_process)
Alkbh7	ENSMUSG00000002661	protein_coding	+	chr17:56997338-56999322	4.81051	4.32032	1.11346	0.155051	0.61815	0.999241	up	4.25252	6.10073	4.07828	5.70762	4.93499	2.31834	66400	2310045B01Rik|2510008E23Rik|Abh7|Spata11	MGI:MGI:1913650|Ensembl:ENSMUSG00000002661|Vega:OTTMUSG00000028993	17	17|17 E1.1	alkB homolog 7		GO:0005739(mitochondrion)//GO:0005759(mitochondrial matrix)	GO:0000907(sulfonate dioxygenase activity)//GO:0016706(oxidoreductase activity, acting on paired donors, with incorporation or reduction of molecular oxygen, 2-oxoglutarate as one donor, and incorporation of one atom each of oxygen into both donors)//GO:0043734(DNA-N1-methyladenine dioxygenase activity)//GO:0019798(procollagen-proline dioxygenase activity)//GO:0052635(C-20 gibberellin 2-beta-diox…	GO:0055114(oxidation-reduction process)//GO:0006974(cellular response to DNA damage stimulus)//GO:0012501(programmed cell death)//GO:0006631(fatty acid metabolic process)//GO:0010883(regulation of lipid storage)//GO:1902445(regulation of mitochondrial membrane permeability involved in programmed necrotic cell death)
Pspn	ENSMUSG00000002664	protein_coding	-	chr17:56999456-57000018	0	0	1	0	1	1	up	0	0	0	0	0	0	19197	PSP	MGI:MGI:1201684|Ensembl:ENSMUSG00000002664|Vega:OTTMUSG00000028994	17	17|17 D	persephin		GO:0005576(extracellular region)//GO:0005615(extracellular space)	GO:0005102(receptor binding)//GO:0008083(growth factor activity)	GO:0001658(branching involved in ureteric bud morphogenesis)
Dennd1c	ENSMUSG00000002668	protein_coding	-	chr17:57066055-57078510	0.115858	0.0528293	2.19305	1.13294	1	1	up	0.113166	0.203465	0.0309417	0.0979873	0.0305229	0.0299776	70785	4432409M07Rik	MGI:MGI:1918035|Ensembl:ENSMUSG00000002668	17	17|17 E1.1	DENN/MADD domain containing 1C		GO:0005575(cellular_component)//GO:0031410(cytoplasmic vesicle)//GO:0005737(cytoplasm)	GO:0017112(Rab guanyl-nucleotide exchange factor activity)//GO:0005085(guanyl-nucleotide exchange factor activity)
Prkd1	ENSMUSG00000002688	protein_coding	-	chr12:50341230-51062543	0.709894	0.585397	1.21267	0.27819	0.4238	0.999241	up	0.852976	0.484267	0.79244	0.621406	0.701553	0.433231	18760	PKD|PKD1|Pkcm|Prkcm	MGI:MGI:99879|Ensembl:ENSMUSG00000002688	12	12|12 C1	protein kinase D1	mmu04015(Rap1 signaling pathway)//mmu04925(Aldosterone synthesis and secretion)	GO:0005886(plasma membrane)//GO:0005938(cell cortex)//GO:0005802(trans-Golgi network)//GO:0016020(membrane)//GO:0005794(Golgi apparatus)//GO:0005829(cytosol)//GO:0005911(cell-cell junction)//GO:0005634(nucleus)//GO:0005737(cytoplasm)	GO:0004674(protein serine/threonine kinase activity)//GO:0004672(protein kinase activity)//GO:0042802(identical protein binding)//GO:0000166(nucleotide binding)//GO:0016301(kinase activity)//GO:0004697(protein kinase C activity)//GO:0046872(metal ion binding)//GO:0005515(protein binding)//GO:0005524(ATP binding)//GO:0016740(transferase activity)	GO:0010837(regulation of keratinocyte proliferation)//GO:0035924(cellular response to vascular endothelial growth factor stimulus)//GO:0043123(positive regulation of I-kappaB kinase/NF-kappaB signaling)//GO:0010976(positive regulation of neuron projection development)//GO:0016310(phosphorylation)//GO:0032793(positive regulation of CREB transcription factor activity)//GO:0060548(negative regulatio…
Lcp2	ENSMUSG00000002699	protein_coding	+	chr11:33629338-34098554	0.419452	0.107885	3.88795	1.95901	1	1	up	0.56551	0.189196	0.503652	0.256334	0.0227067	0.0446149	16822	AI323664|BB161688|SLP-76|SLP76|m1Khoe|twm	MGI:MGI:1321402|Ensembl:ENSMUSG00000002699|Vega:OTTMUSG00000005404	11	11|11 A4	lymphocyte cytosolic protein 2	mmu04015(Rap1 signaling pathway)//mmu04380(Osteoclast differentiation)//mmu04611(Platelet activation)//mmu04650(Natural killer cell mediated cytotoxicity)//mmu04660(T cell receptor signaling pathway)//mmu04664(Fc epsilon RI signaling pathway)	GO:0036398(TCR signalosome)//GO:0044853(plasma membrane raft)//GO:0005911(cell-cell junction)//GO:0005737(cytoplasm)//GO:0005829(cytosol)	GO:0005515(protein binding)	GO:0007169(transmembrane receptor protein tyrosine kinase signaling pathway)//GO:0045576(mast cell activation)//GO:0050852(T cell receptor signaling pathway)//GO:0006955(immune response)//GO:0035556(intracellular signal transduction)//GO:0050663(cytokine secretion)
Cse1l	ENSMUSG00000002718	protein_coding	+	chr2:166906039-166946389	33.9473	33.6252	1.00958	0.0137538	0.959	0.999241	up	33.9496	39.1323	28.7601	32.4336	34.2649	34.1771	110750	2610100P18Rik|AA407533|Capts|Cas|Xpo2	MGI:MGI:1339951|Ensembl:ENSMUSG00000002718|Vega:OTTMUSG00000001165	2	2 H3|2 87.22 cM	chromosome segregation 1-like (S. cerevisiae)		GO:0070062(extracellular exosome)//GO:0005635(nuclear envelope)//GO:0016020(membrane)//GO:0005829(cytosol)//GO:0005654(nucleoplasm)//GO:0005634(nucleus)//GO:0005737(cytoplasm)	GO:0005049(nuclear export signal receptor activity)//GO:0005515(protein binding)//GO:0008536(Ran GTPase binding)	GO:0015031(protein transport)//GO:0006810(transport)//GO:0006606(protein import into nucleus)//GO:0006611(protein export from nucleus)//GO:0006886(intracellular protein transport)
Prkra	ENSMUSG00000002731	protein_coding	-	chr2:76629897-76648015	2.5157	2.19528	1.14596	0.196555	0.5399	0.999241	up	2.7576	2.40742	2.3821	3.20116	1.71338	1.67132	23992	AV120107|PRK|Pact|RAX|lear	MGI:MGI:1344375|Ensembl:ENSMUSG00000002731|Vega:OTTMUSG00000013128	2	2|2 C3	protein kinase, interferon inducible double stranded RNA dependent activator		GO:0005622(intracellular)//GO:0016020(membrane)//GO:0005737(cytoplasm)//GO:0005654(nucleoplasm)	GO:0042803(protein homodimerization activity)//GO:0019901(protein kinase binding)//GO:0003723(RNA binding)//GO:0019899(enzyme binding)//GO:0008047(enzyme activator activity)//GO:0003725(double-stranded RNA binding)//GO:0042802(identical protein binding)//GO:0044822(poly(A) RNA binding)//GO:0005515(protein binding)	GO:0031054(pre-miRNA processing)//GO:0048705(skeletal system morphogenesis)//GO:0031047(gene silencing by RNA)//GO:0006468(protein phosphorylation)//GO:2001244(positive regulation of intrinsic apoptotic signaling pathway)//GO:0008284(positive regulation of cell proliferation)//GO:0042474(middle ear morphogenesis)//GO:0034599(cellular response to oxidative stress)//GO:0030422(production of siRNA i…
Ykt6	ENSMUSG00000002741	protein_coding	+	chr11:5955692-5967780	14.458	12.1876	1.18629	0.246461	0.1934	0.999241	up	15.8726	14.7482	12.7533	14.3763	11.3005	10.8859	56418	0610042I15Rik|1810013M05Rik|AW105923	MGI:MGI:1927550|Ensembl:ENSMUSG00000002741|Vega:OTTMUSG00000005103	11	11|11 A1	YKT6 v-SNARE homolog (S. cerevisiae)	mmu04130(SNARE interactions in vesicular transport)	GO:0031201(SNARE complex)//GO:0005768(endosome)//GO:0016021(integral component of membrane)//GO:0005887(integral component of plasma membrane)//GO:0016020(membrane)//GO:0097441(basilar dendrite)//GO:0005794(Golgi apparatus)//GO:0005739(mitochondrion)//GO:0097440(apical dendrite)//GO:0031410(cytoplasmic vesicle)//GO:0070062(extracellular exosome)//GO:0005783(endoplasmic reticulum)//GO:0005737(cyto…	GO:0019707(protein-cysteine S-acyltransferase activity)//GO:0090595(acetyl-CoA:L-lysine N6-acetyltransferase)//GO:0034919(butyryl-CoA 2-C-propionyltransferase activity)//GO:0008080(N-acetyltransferase activity)//GO:0016751(S-succinyltransferase activity)//GO:0019107(myristoyltransferase activity)//GO:0052858(peptidyl-lysine N-acetyltransferase activity, acting on acetyl phosphate as donor)//GO:00…	GO:0042147(retrograde transport, endosome to Golgi)//GO:0006906(vesicle fusion)//GO:0006903(vesicle targeting)//GO:0016192(vesicle-mediated transport)//GO:0006904(vesicle docking involved in exocytosis)//GO:0006810(transport)//GO:0015031(protein transport)//GO:0006887(exocytosis)//GO:0006888(ER to Golgi vesicle-mediated transport)
Baz1b	ENSMUSG00000002748	protein_coding	+	chr5:135187263-135246129	10.885	9.45203	1.15161	0.203647	0.28985	0.999241	up	11.5759	9.79601	11.2831	8.07542	10.3669	9.91379	22385	C87820|WSTF|Wbscr9	MGI:MGI:1353499|Ensembl:ENSMUSG00000002748|Vega:OTTMUSG00000017117	5	5|5 G2	bromodomain adjacent to zinc finger domain, 1B		GO:0005721(pericentric heterochromatin)//GO:0005634(nucleus)//GO:0043596(nuclear replication fork)//GO:0000793(condensed chromosome)	GO:0071884(vitamin D receptor activator activity)//GO:0008270(zinc ion binding)//GO:0004713(protein tyrosine kinase activity)//GO:0004715(non-membrane spanning protein tyrosine kinase activity)//GO:0005524(ATP binding)//GO:0035173(histone kinase activity)//GO:0003682(chromatin binding)//GO:0042393(histone binding)//GO:0000166(nucleotide binding)//GO:0016301(kinase activity)//GO:0070577(lysine-ace…	GO:0006333(chromatin assembly or disassembly)//GO:0006338(chromatin remodeling)//GO:0006974(cellular response to DNA damage stimulus)//GO:0016310(phosphorylation)//GO:2000273(positive regulation of receptor activity)//GO:0048096(chromatin-mediated maintenance of transcription)//GO:0003007(heart morphogenesis)//GO:0006351(transcription, DNA-templated)//GO:0006302(double-strand break repair)//GO:00…
Gnmt	ENSMUSG00000002769	protein_coding	-	chr17:45606434-46831413	1.15434	1.06338	1.08553	0.118402	0.92825	0.999241	up	0.969391	1.92791	0.565713	0.77137	0.888118	1.53066	14711	-	MGI:MGI:1202304|Ensembl:ENSMUSG00000002769|Vega:OTTMUSG00000026384	17	17 22.9 cM|17 C	glycine N-methyltransferase	mmu00260(Glycine, serine and threonine metabolism)	GO:0005737(cytoplasm)	GO:0008168(methyltransferase activity)//GO:0016594(glycine binding)//GO:0005542(folic acid binding)//GO:0016740(transferase activity)//GO:0017174(glycine N-methyltransferase activity)	GO:0005977(glycogen metabolic process)//GO:0006730(one-carbon metabolic process)//GO:0006555(methionine metabolic process)//GO:0046500(S-adenosylmethionine metabolic process)//GO:0006111(regulation of gluconeogenesis)//GO:0032259(methylation)//GO:0051289(protein homotetramerization)
Jag2	ENSMUSG00000002799	protein_coding	-	chr12:112908589-112929495	1.84255	1.74789	1.05416	0.07609	0.76235	0.999241	up	2.1722	1.69264	1.66282	1.77326	1.56579	1.90463	16450	D12Ggc2e|Serh|mJagged2-1|sm	MGI:MGI:1098270|Ensembl:ENSMUSG00000002799	12	12 F1|12 61.37 cM	jagged 2	mmu04330(Notch signaling pathway)	GO:0016020(membrane)//GO:0016021(integral component of membrane)//GO:0005887(integral component of plasma membrane)//GO:0048471(perinuclear region of cytoplasm)	GO:0008083(growth factor activity)//GO:0005515(protein binding)//GO:0005509(calcium ion binding)//GO:0005112(Notch binding)	GO:0045747(positive regulation of Notch signaling pathway)//GO:0030155(regulation of cell adhesion)//GO:0042492(gamma-delta T cell differentiation)//GO:0001709(cell fate determination)//GO:0001501(skeletal system development)//GO:0007154(cell communication)//GO:0007283(spermatogenesis)//GO:0042127(regulation of cell proliferation)//GO:0001701(in utero embryonic development)//GO:0042475(odontogene…
Atg4d	ENSMUSG00000002820	protein_coding	+	chr9:21265298-21287969	4.89602	4.43472	1.10402	0.142767	0.60215	0.999241	up	5.49691	4.86611	4.32503	4.69496	4.47831	4.13087	235040	9830134P12Rik|APG4-D|Apg4d|Atg4dl|Autl4	MGI:MGI:2444308|Ensembl:ENSMUSG00000002820	9	9|9 A3	autophagy related 4D, cysteine peptidase	mmu04140(Regulation of autophagy)	GO:0005739(mitochondrion)//GO:0005737(cytoplasm)//GO:0005829(cytosol)	GO:0008233(peptidase activity)//GO:0004197(cysteine-type endopeptidase activity)//GO:0016787(hydrolase activity)//GO:0008234(cysteine-type peptidase activity)	GO:0044804(nucleophagy)//GO:0000045(autophagosome assembly)//GO:0006914(autophagy)//GO:0006612(protein targeting to membrane)//GO:0051697(protein delipidation)//GO:0006501(C-terminal protein lipidation)//GO:0016485(protein processing)//GO:0006508(proteolysis)//GO:0006810(transport)//GO:0006915(apoptotic process)//GO:0015031(protein transport)//GO:0000422(mitophagy)
Qtrt1	ENSMUSG00000002825	protein_coding	+	chr9:21411836-21420277	1.35495	1.10476	1.22646	0.2945	0.4691	0.999241	up	1.1928	1.5748	1.29724	0.784754	0.974943	1.55459	60507	2610028E17Rik|Tgt	MGI:MGI:1931441|Ensembl:ENSMUSG00000002825	9	9|9 A4	queuine tRNA-ribosyltransferase 1		GO:0005739(mitochondrion)//GO:0005634(nucleus)//GO:0005737(cytoplasm)	GO:0008479(queuine tRNA-ribosyltransferase activity)//GO:0046872(metal ion binding)//GO:0005515(protein binding)//GO:0016757(transferase activity, transferring glycosyl groups)//GO:0016740(transferase activity)	GO:0006400(tRNA modification)//GO:0008616(queuosine biosynthetic process)//GO:0008033(tRNA processing)
Chaf1a	ENSMUSG00000002835	protein_coding	+	chr17:56040415-56075028	0.285363	0.28054	1.01719	0.0245922	1	1	up	0.234111	0.249038	0.372939	0.29505	0.252929	0.29364	27221	AL023013|AL024058|CAF-1|Cac1p	MGI:MGI:1351331|Ensembl:ENSMUSG00000002835	17	17|17 D	chromatin assembly factor 1, subunit A (p150)		GO:0033186(CAF-1 complex)//GO:0000790(nuclear chromatin)//GO:0043234(protein complex)//GO:0043231(intracellular membrane-bounded organelle)//GO:0005730(nucleolus)//GO:0005634(nucleus)	GO:0070087(chromo shadow domain binding)//GO:0005515(protein binding)//GO:0042802(identical protein binding)	GO:0006335(DNA replication-dependent nucleosome assembly)//GO:0006974(cellular response to DNA damage stimulus)//GO:0031497(chromatin assembly)//GO:0007049(cell cycle)//GO:0006334(nucleosome assembly)//GO:0006260(DNA replication)//GO:0006281(DNA repair)
Tmem39a	ENSMUSG00000002845	protein_coding	+	chr16:38558697-38592162	6.3343	6.30459	1.00471	0.00678323	0.9846	0.999241	up	6.83587	6.12944	6.03759	7.83801	6.69239	4.38337	67846	2610033C09Rik	MGI:MGI:1915096|Ensembl:ENSMUSG00000002845|Vega:OTTMUSG00000036539	16	16|16 B4	transmembrane protein 39a		GO:0016020(membrane)//GO:0016021(integral component of membrane)//GO:0005575(cellular_component)	GO:0003674(molecular_function)	GO:0002230(positive regulation of defense response to virus by host)//GO:0098779(mitophagy in response to mitochondrial depolarization)//GO:0098792(xenophagy)
Nab1	ENSMUSG00000002881	protein_coding	-	chr1:52457293-52500679	4.23615	3.35817	1.26145	0.33508	0.1371	0.999241	up	4.64344	4.26337	3.80165	4.15507	2.69551	3.22393	17936	-	MGI:MGI:107564|Ensembl:ENSMUSG00000002881|Vega:OTTMUSG00000035900	1	1 C1.1|1 26.99 cM	Ngfi-A binding protein 1		GO:0005634(nucleus)	GO:0000989(transcription factor activity, transcription factor binding)//GO:0008134(transcription factor binding)	GO:0014037(Schwann cell differentiation)//GO:0001958(endochondral ossification)//GO:0045682(regulation of epidermis development)//GO:0006351(transcription, DNA-templated)//GO:0042552(myelination)//GO:0045892(negative regulation of transcription, DNA-templated)//GO:0006355(regulation of transcription, DNA-templated)
Ppp1r17	ENSMUSG00000002930	protein_coding	+	chr6:56017514-56032688	0	0	1	0	1	1	up	0	0	0	0	0	0	19051	Gsbs|Ppp1r2	MGI:MGI:1333876|Ensembl:ENSMUSG00000002930|Vega:OTTMUSG00000057891	6	6 27.65 cM|6 C1	protein phosphatase 1, regulatory subunit 17	mmu04730(Long-term depression)	GO:0005829(cytosol)	GO:0004865(protein serine/threonine phosphatase inhibitor activity)//GO:0004864(protein phosphatase inhibitor activity)//GO:0019212(phosphatase inhibitor activity)	GO:0043086(negative regulation of catalytic activity)//GO:0010921(regulation of phosphatase activity)
Map2k7	ENSMUSG00000002948	protein_coding	+	chr8:4238739-4251423	16.2088	15.5312	1.04363	0.0616036	0.77795	0.999241	up	16.5471	17.1006	14.9786	12.6676	15.4507	18.4753	26400	5930412N11Rik|JNKK 2|Jnkk2|MAPKK 7|MEK 7|Mapkk7|Mek7|Mkk7|Prkmk7|sek2	MGI:MGI:1346871|Ensembl:ENSMUSG00000002948|Ensembl:ENSMUSG00000109061|Vega:OTTMUSG00000020569|Vega:OTTMUSG00000059344	8	8|8 A1.1	mitogen-activated protein kinase kinase 7	mmu04010(MAPK signaling pathway)//mmu04012(ErbB signaling pathway)//mmu04141(Protein processing in endoplasmic reticulum)//mmu04380(Osteoclast differentiation)//mmu04620(Toll-like receptor signaling pathway)//mmu04660(T cell receptor signaling pathway)//mmu04664(Fc epsilon RI signaling pathway)//mmu04668(TNF signaling pathway)//mmu04722(Neurotrophin signaling pathway)//mmu04912(GnRH signaling pat…	GO:0005634(nucleus)//GO:0005737(cytoplasm)//GO:0005829(cytosol)	GO:0019903(protein phosphatase binding)//GO:0004674(protein serine/threonine kinase activity)//GO:0019901(protein kinase binding)//GO:0004702(receptor signaling protein serine/threonine kinase activity)//GO:0004672(protein kinase activity)//GO:0019899(enzyme binding)//GO:0008545(JUN kinase kinase activity)//GO:0000287(magnesium ion binding)//GO:0004708(MAP kinase kinase activity)//GO:0031435(mito…	GO:1904355(positive regulation of telomere capping)//GO:0051973(positive regulation of telomerase activity)//GO:0009408(response to heat)//GO:0007257(activation of JUN kinase activity)//GO:0009611(response to wounding)//GO:0043525(positive regulation of neuron apoptotic process)//GO:0006468(protein phosphorylation)//GO:0006970(response to osmotic stress)//GO:0032212(positive regulation of telomer…
Pnkp	ENSMUSG00000002963	protein_coding	+	chr7:44857138-44862925	3.68957	3.68741	1.00059	0.000847501	0.9973	0.999395	up	4.59412	2.99512	3.47948	3.31548	4.2344	3.51234	59047	1810009G08Rik|PNK	MGI:MGI:1891698|Ensembl:ENSMUSG00000002963|Vega:OTTMUSG00000022325	7	7|7 B2	polynucleotide kinase 3'- phosphatase		GO:0005730(nucleolus)//GO:0005634(nucleus)//GO:0005739(mitochondrion)//GO:0016020(membrane)	GO:0019201(nucleotide kinase activity)//GO:0005524(ATP binding)//GO:0046404(ATP-dependent polydeoxyribonucleotide 5'-hydroxyl-kinase activity)//GO:0046403(polynucleotide 3'-phosphatase activity)//GO:0000166(nucleotide binding)//GO:0016301(kinase activity)//GO:0016787(hydrolase activity)//GO:0003824(catalytic activity)//GO:0016740(transferase activity)//GO:0003690(double-stranded DNA binding)	GO:1904355(positive regulation of telomere capping)//GO:0008152(metabolic process)//GO:0042769(DNA damage response, detection of DNA damage)//GO:0006979(response to oxidative stress)//GO:0016310(phosphorylation)//GO:0098506(polynucleotide 3' dephosphorylation)//GO:0051973(positive regulation of telomerase activity)//GO:0006974(cellular response to DNA damage stimulus)//GO:0016311(dephosphorylatio…
Relb	ENSMUSG00000002983	protein_coding	-	chr7:19606216-19629438	1.60231	1.54618	1.0363	0.0514411	0.87025	0.999241	up	2.36532	1.19149	1.25011	0.675477	1.64176	2.3213	19698	shep	MGI:MGI:103289|Ensembl:ENSMUSG00000002983|Vega:OTTMUSG00000020490	7	7 A3|7 9.93 cM	avian reticuloendotheliosis viral (v-rel) oncogene related B	mmu04010(MAPK signaling pathway)//mmu04064(NF-kappa B signaling pathway)//mmu04380(Osteoclast differentiation)//mmu05166(HTLV-I infection)//mmu05169(Epstein-Barr virus infection)	GO:0033256(I-kappaB/NF-kappaB complex)//GO:0005829(cytosol)//GO:0005654(nucleoplasm)//GO:0005634(nucleus)//GO:0005856(cytoskeleton)//GO:0005737(cytoplasm)	GO:0001047(core promoter binding)//GO:0003682(chromatin binding)//GO:0005515(protein binding)//GO:0003677(DNA binding)//GO:0003700(transcription factor activity, sequence-specific DNA binding)	GO:0007249(I-kappaB kinase/NF-kappaB signaling)//GO:0032922(circadian regulation of gene expression)//GO:0034097(response to cytokine)//GO:0045087(innate immune response)//GO:0045063(T-helper 1 cell differentiation)//GO:0010628(positive regulation of gene expression)//GO:0048511(rhythmic process)//GO:0006351(transcription, DNA-templated)//GO:0071470(cellular response to osmotic stress)//GO:001988…
Tomm40	ENSMUSG00000002984	protein_coding	-	chr7:19701312-19749573	6.1492	5.07374	1.21197	0.27735	0.3019	0.999241	up	5.91664	6.93413	5.59683	4.4595	5.49229	5.26943	53333	AW539759|Mom35|Tom40	MGI:MGI:1858259|Ensembl:ENSMUSG00000002984|Vega:OTTMUSG00000038241	7	7|7 A3	translocase of outer mitochondrial membrane 40 homolog (yeast)	mmu05014(Amyotrophic lateral sclerosis (ALS))	GO:0016021(integral component of membrane)//GO:0046930(pore complex)//GO:0016020(membrane)//GO:0032592(integral component of mitochondrial membrane)//GO:0031307(integral component of mitochondrial outer membrane)//GO:0005739(mitochondrion)//GO:0005741(mitochondrial outer membrane)//GO:0070062(extracellular exosome)//GO:0005654(nucleoplasm)//GO:0005742(mitochondrial outer membrane translocase comp…	GO:0015288(porin activity)//GO:0015266(protein channel activity)//GO:0008320(protein transmembrane transporter activity)	GO:0006626(protein targeting to mitochondrion)//GO:0055085(transmembrane transport)//GO:0006810(transport)//GO:0015031(protein transport)//GO:0030150(protein import into mitochondrial matrix)//GO:0006811(ion transport)
Apoc2	ENSMUSG00000002992	protein_coding	-	chr7:19671578-19681423	0.7756	0.680004	1.14058	0.189769	0.8194	0.999241	up	0.306389	2.02041	0	0.699092	0.709773	0.631148	11813	apo-CII|apoC-II	MGI:MGI:88054|Ensembl:ENSMUSG00000002992|Vega:OTTMUSG00000032974	7	7 A3|7 9.94 cM	apolipoprotein C-II		GO:0034363(intermediate-density lipoprotein particle)//GO:0070062(extracellular exosome)//GO:0042627(chylomicron)//GO:0034362(low-density lipoprotein particle)//GO:0034361(very-low-density lipoprotein particle)//GO:0034366(spherical high-density lipoprotein particle)//GO:0005615(extracellular space)	GO:0055102(lipase inhibitor activity)//GO:0043274(phospholipase binding)//GO:0042803(protein homodimerization activity)//GO:0060230(lipoprotein lipase activator activity)//GO:0008289(lipid binding)//GO:0016004(phospholipase activator activity)	GO:0045723(positive regulation of fatty acid biosynthetic process)//GO:0010518(positive regulation of phospholipase activity)//GO:0048261(negative regulation of receptor-mediated endocytosis)//GO:0060697(positive regulation of phospholipid catabolic process)//GO:0070328(triglyceride homeostasis)//GO:0032375(negative regulation of cholesterol transport)//GO:0045833(negative regulation of lipid met…
Prkar2b	ENSMUSG00000002997	protein_coding	-	chr12:31958475-32061296	6.02121	3.99158	1.50848	0.593092	0.0236	0.765271	up	13.6959	2.90973	1.45794	2.23522	7.94733	1.79219	19088	AI451071|AW061005|PKARIIbeta|Pkarb2|RII(beta)	MGI:MGI:97760|Ensembl:ENSMUSG00000002997|Vega:OTTMUSG00000016980	12	12|12 B1	protein kinase, cAMP dependent regulatory, type II beta	mmu04210(Apoptosis)//mmu04910(Insulin signaling pathway)	GO:0005743(mitochondrial inner membrane)//GO:0070062(extracellular exosome)//GO:0016020(membrane)//GO:0030425(dendrite)//GO:0048471(perinuclear region of cytoplasm)//GO:0005886(plasma membrane)//GO:0043198(dendritic shaft)//GO:0005952(cAMP-dependent protein kinase complex)//GO:0005813(centrosome)//GO:0045121(membrane raft)//GO:0097546(ciliary base)//GO:0043197(dendritic spine)//GO:0005737(cytopla…	GO:0004862(cAMP-dependent protein kinase inhibitor activity)//GO:0008603(cAMP-dependent protein kinase regulator activity)//GO:0019904(protein domain specific binding)//GO:0019901(protein kinase binding)//GO:0030552(cAMP binding)//GO:0000166(nucleotide binding)//GO:0034236(protein kinase A catalytic subunit binding)//GO:0005515(protein binding)//GO:0031625(ubiquitin protein ligase binding)	GO:2000480(negative regulation of cAMP-dependent protein kinase activity)//GO:0006631(fatty acid metabolic process)//GO:0007612(learning)//GO:0001932(regulation of protein phosphorylation)//GO:0045859(regulation of protein kinase activity)
Ap1m1	ENSMUSG00000003033	protein_coding	+	chr8:72240017-72257385	6.53282	6.32738	1.03247	0.0460979	0.85715	0.999241	up	7.17411	6.62174	5.80261	6.46326	6.05877	6.46011	11767	AA408894|AP47|Adtm1A|Cltnm|[m]1A|mu1A	MGI:MGI:102776|Ensembl:ENSMUSG00000003033|Vega:OTTMUSG00000022231	8	8 B3.3|8 34.92 cM	adaptor-related protein complex AP-1, mu subunit 1	mmu04142(Lysosome)	GO:0030131(clathrin adaptor complex)//GO:0070062(extracellular exosome)//GO:0005802(trans-Golgi network)//GO:0016020(membrane)//GO:0005794(Golgi apparatus)//GO:0031410(cytoplasmic vesicle)	GO:0005515(protein binding)	GO:0032438(melanosome organization)//GO:0035646(endosome to melanosome transport)//GO:0016192(vesicle-mediated transport)//GO:0006886(intracellular protein transport)//GO:0006810(transport)//GO:0015031(protein transport)
Hmgn2	ENSMUSG00000003038	protein_coding	-	chr4:133964737-133968650	21.1283	20.8709	1.01233	0.0176846	0.9279	0.999241	up	21.0615	25.3975	16.9259	25.9557	23.1794	13.4775	15331	HMG-17|Hmg17	MGI:MGI:96136|Ensembl:ENSMUSG00000003038|Vega:OTTMUSG00000009711	4	4 D3|4 66.47 cM	high mobility group nucleosomal binding domain 2		GO:0005634(nucleus)		GO:0006357(regulation of transcription from RNA polymerase II promoter)//GO:0040034(regulation of development, heterochronic)//GO:0000122(negative regulation of transcription from RNA polymerase II promoter)
Elf3	ENSMUSG00000003051	protein_coding	-	chr1:135248560-135284084	0.16661	0.0648755	2.56815	1.36073	1	1	up	0.144587	0	0.355244	0.0416997	0	0.152927	13710	ESE-1|ESX|jen	MGI:MGI:1101781|Ensembl:ENSMUSG00000003051|Vega:OTTMUSG00000049800	1	1|1 F	E74-like factor 3		GO:0005634(nucleus)//GO:0005737(cytoplasm)	GO:0003700(transcription factor activity, sequence-specific DNA binding)//GO:0043565(sequence-specific DNA binding)//GO:0000978(RNA polymerase II core promoter proximal region sequence-specific DNA binding)//GO:0001077(transcriptional activator activity, RNA polymerase II core promoter proximal region sequence-specific binding)//GO:0003677(DNA binding)//GO:0003713(transcription coactivator activi…	GO:0030198(extracellular matrix organization)//GO:0009653(anatomical structure morphogenesis)//GO:0006351(transcription, DNA-templated)//GO:0030154(cell differentiation)//GO:0060056(mammary gland involution)//GO:0006954(inflammatory response)//GO:0006366(transcription from RNA polymerase II promoter)//GO:0007275(multicellular organism development)//GO:0045944(positive regulation of transcription …
Cyp2c29	ENSMUSG00000003053	protein_coding	+	chr19:39229253-39330713	0.474111	0.377554	1.25574	0.328541	1	1	up	0.248882	1.17345	0	0.191304	0.357089	0.58427	13095	AHOH|AHOHase|AI159681|AI196010|Ah-2|Ahh-1|Cyp2c|P450-2C	MGI:MGI:103238|Ensembl:ENSMUSG00000003053|Vega:OTTMUSG00000028391	19	19 33.91 cM|19 D2	cytochrome P450, family 2, subfamily c, polypeptide 29	mmu00140(Steroid hormone biosynthesis)//mmu00590(Arachidonic acid metabolism)//mmu00591(Linoleic acid metabolism)//mmu00830(Retinol metabolism)//mmu01100(Metabolic pathways)//mmu04726(Serotonergic synapse)//mmu04750(Inflammatory mediator regulation of TRP channels)//mmu05204(Chemical carcinogenesis)	GO:0005783(endoplasmic reticulum)//GO:0016020(membrane)//GO:0043231(intracellular membrane-bounded organelle)	GO:0005506(iron ion binding)//GO:0016712(oxidoreductase activity, acting on paired donors, with incorporation or reduction of molecular oxygen, reduced flavin or flavoprotein as one donor, and incorporation of one atom of oxygen)//GO:0070330(aromatase activity)//GO:0016705(oxidoreductase activity, acting on paired donors, with incorporation or reduction of molecular oxygen)//GO:0008392(arachidoni…	GO:0055114(oxidation-reduction process)//GO:0019373(epoxygenase P450 pathway)
Stk11	ENSMUSG00000003068	protein_coding	+	chr10:79697304-80369637	24.6317	23.6203	1.04282	0.0604864	0.94655	0.999241	up	24.8805	26.0118	23.0028	23.8492	25.5021	21.5096	20869	AA408040|Lkb1|Par-4|R75140	MGI:MGI:1341870|Ensembl:ENSMUSG00000003068|Vega:OTTMUSG00000000002	10	10|10 C1	serine/threonine kinase 11	mmu04068(FoxO signaling pathway)//mmu04150(mTOR signaling pathway)//mmu04151(PI3K-Akt signaling pathway)//mmu04152(AMPK signaling pathway)//mmu04211(Longevity regulating pathway - mammal)//mmu04920(Adipocytokine signaling pathway)	GO:0070062(extracellular exosome)//GO:0016020(membrane)//GO:0043234(protein complex)//GO:0005829(cytosol)//GO:0005739(mitochondrion)//GO:0036398(TCR signalosome)//GO:0005634(nucleus)//GO:0005737(cytoplasm)	GO:0030295(protein kinase activator activity)//GO:0004674(protein serine/threonine kinase activity)//GO:0032403(protein complex binding)//GO:0004672(protein kinase activity)//GO:0000287(magnesium ion binding)//GO:0000166(nucleotide binding)//GO:0005524(ATP binding)//GO:0016301(kinase activity)//GO:0030275(LRR domain binding)//GO:0046872(metal ion binding)//GO:0005515(protein binding)//GO:0002039(…	GO:0016310(phosphorylation)//GO:0050852(T cell receptor signaling pathway)//GO:0007283(spermatogenesis)//GO:0051055(negative regulation of lipid biosynthetic process)//GO:0001894(tissue homeostasis)//GO:0008285(negative regulation of cell proliferation)//GO:0006914(autophagy)//GO:0050772(positive regulation of axonogenesis)//GO:0045722(positive regulation of gluconeogenesis)//GO:0030010(establish…
Cdk12	ENSMUSG00000003119	protein_coding	+	chr11:98203058-98278531	1.92993	1.35722	1.42198	0.507898	0.24485	0.999241	up	1.69606	1.6177	2.47604	0.970054	0.979153	2.12245	69131	1810022J16Rik|AI646528|Crk7|Crkrs|D11Ertd752e|Pksc	MGI:MGI:1098802|Ensembl:ENSMUSG00000003119|Vega:OTTMUSG00000002637	11	11 D|11 61.75 cM	cyclin-dependent kinase 12		GO:0019908(nuclear cyclin-dependent protein kinase holoenzyme complex)//GO:0005730(nucleolus)//GO:0005634(nucleus)//GO:0016607(nuclear speck)//GO:0002944(cyclin K-CDK12 complex)	GO:0004674(protein serine/threonine kinase activity)//GO:0004672(protein kinase activity)//GO:0004693(cyclin-dependent protein serine/threonine kinase activity)//GO:0008353(RNA polymerase II carboxy-terminal domain kinase activity)//GO:0000166(nucleotide binding)//GO:0016301(kinase activity)//GO:0030332(cyclin binding)//GO:0005524(ATP binding)//GO:0016740(transferase activity)	GO:0008380(RNA splicing)//GO:0043405(regulation of MAP kinase activity)//GO:0016310(phosphorylation)//GO:0006468(protein phosphorylation)//GO:0046777(protein autophosphorylation)//GO:0070816(phosphorylation of RNA polymerase II C-terminal domain)//GO:0006397(mRNA processing)//GO:0043484(regulation of RNA splicing)
Lipe	ENSMUSG00000003123	protein_coding	-	chr7:25376818-25566417	5.14561	4.46688	1.15195	0.204074	0.54615	0.999241	up	6.8924	4.53196	4.01247	2.7823	6.64033	3.97802	16890	4933403G17Rik|HSL	MGI:MGI:96790|Ensembl:ENSMUSG00000003123|Vega:OTTMUSG00000034139	7	7 A3|7 13.78 cM	lipase, hormone sensitive	mmu04024(cAMP signaling pathway)//mmu04152(AMPK signaling pathway)//mmu04910(Insulin signaling pathway)//mmu04923(Regulation of lipolysis in adipocytes)//mmu04925(Aldosterone synthesis and secretion)	GO:0005886(plasma membrane)//GO:0005901(caveola)//GO:0005811(lipid particle)//GO:0016020(membrane)//GO:0005829(cytosol)//GO:0005739(mitochondrion)//GO:0005634(nucleus)//GO:0005615(extracellular space)//GO:0005737(cytoplasm)	GO:0033878(hormone-sensitive lipase activity)//GO:0019901(protein kinase binding)//GO:0004806(triglyceride lipase activity)//GO:0042134(rRNA primary transcript binding)//GO:0016788(hydrolase activity, acting on ester bonds)//GO:0016298(lipase activity)//GO:0047372(acylglycerol lipase activity)//GO:0005515(protein binding)//GO:0016787(hydrolase activity)	GO:0008152(metabolic process)//GO:0046340(diacylglycerol catabolic process)//GO:0016042(lipid catabolic process)//GO:0042758(long-chain fatty acid catabolic process)//GO:0019433(triglyceride catabolic process)//GO:0008203(cholesterol metabolic process)//GO:0006629(lipid metabolic process)//GO:0006363(termination of RNA polymerase I transcription)//GO:0006361(transcription initiation from RNA poly…
Tbc1d8	ENSMUSG00000003134	protein_coding	-	chr1:39367850-39478747	2.5445	2.03513	1.25029	0.322266	0.69325	0.999241	up	2.54523	2.59055	2.49773	1.76157	2.07315	2.27066	54610	AD3|HBLP1|VRP	MGI:MGI:1927225|Ensembl:ENSMUSG00000003134|Vega:OTTMUSG00000050277	1	1|1 B	TBC1 domain family, member 8		GO:0005622(intracellular)//GO:0012505(endomembrane system)	GO:0005096(GTPase activator activity)//GO:0017137(Rab GTPase binding)	GO:0031338(regulation of vesicle fusion)//GO:0090630(activation of GTPase activity)//GO:0006886(intracellular protein transport)
Cnot11	ENSMUSG00000003135	protein_coding	+	chr1:39534991-39546881	7.99356	7.36656	1.08511	0.117846	0.57475	0.999241	up	8.41706	8.39675	7.16687	6.38983	7.89059	7.81927	52846	2410015L18Rik|C40|D1Bwg0212e	MGI:MGI:106580|Ensembl:ENSMUSG00000003135|Vega:OTTMUSG00000026590	1	1 B|1 18.31 cM	CCR4-NOT transcription complex, subunit 11		GO:0030014(CCR4-NOT complex)//GO:0005634(nucleus)//GO:0005737(cytoplasm)	GO:0003674(molecular_function)	GO:0006417(regulation of translation)//GO:0031047(gene silencing by RNA)//GO:0006351(transcription, DNA-templated)//GO:0006355(regulation of transcription, DNA-templated)//GO:0008150(biological_process)
Foxj2	ENSMUSG00000003154	protein_coding	+	chr6:122813625-122845366	3.79139	3.5814	1.05864	0.0822056	0.7003	0.999241	up	3.33138	4.50758	3.53522	2.54262	3.82986	4.37172	60611	Fhx	MGI:MGI:1926805|Ensembl:ENSMUSG00000003154|Vega:OTTMUSG00000023356	6	6|6 F2	forkhead box J2		GO:0005730(nucleolus)//GO:0005634(nucleus)	GO:0003700(transcription factor activity, sequence-specific DNA binding)//GO:0000981(RNA polymerase II transcription factor activity, sequence-specific DNA binding)//GO:0000978(RNA polymerase II core promoter proximal region sequence-specific DNA binding)//GO:0042802(identical protein binding)//GO:0001077(transcriptional activator activity, RNA polymerase II core promoter proximal region sequence…	GO:0006351(transcription, DNA-templated)//GO:0006355(regulation of transcription, DNA-templated)//GO:0045944(positive regulation of transcription from RNA polymerase II promoter)
Sri	ENSMUSG00000003161	protein_coding	+	chr5:8037293-8069379	8.63532	8.13752	1.06117	0.0856596	0.7686	0.999241	up	7.54655	11.5687	6.79072	10.4542	5.82562	8.13274	109552	2210417O06Rik|2900070H08Rik|Sor	MGI:MGI:98419|Ensembl:ENSMUSG00000003161|Vega:OTTMUSG00000025793	5	5 A1-h|5 3.38 cM	sorcin		GO:0030018(Z disc)//GO:0016529(sarcoplasmic reticulum)//GO:0005886(plasma membrane)//GO:0070062(extracellular exosome)//GO:0043679(axon terminus)//GO:0042584(chromaffin granule membrane)//GO:0005790(smooth endoplasmic reticulum)//GO:0005789(endoplasmic reticulum membrane)//GO:0005829(cytosol)//GO:0030315(T-tubule)//GO:0005739(mitochondrion)//GO:0031982(vesicle)//GO:0044326(dendritic spine neck)//…	GO:0002020(protease binding)//GO:0046982(protein heterodimerization activity)//GO:0004198(calcium-dependent cysteine-type endopeptidase activity)//GO:0070491(repressing transcription factor binding)//GO:0046872(metal ion binding)//GO:0005515(protein binding)//GO:0005509(calcium ion binding)	GO:0010459(negative regulation of heart rate)//GO:0051281(positive regulation of release of sequestered calcium ion into cytosol)//GO:0042994(cytoplasmic sequestering of transcription factor)//GO:1901077(regulation of relaxation of muscle)//GO:1901841(regulation of high voltage-gated calcium channel activity)//GO:2000678(negative regulation of transcription regulatory region DNA binding)//GO:0006…
Mical3	ENSMUSG00000003178	protein_coding	-	chr6:121007240-121081609	2.21847	1.83963	1.20594	0.270153	0.31185	0.999241	up	2.34972	2.13579	2.16992	1.32859	2.08771	2.10258	194401	C130040D16Rik|Mical-3|mKIAA1364	MGI:MGI:2442733|Ensembl:ENSMUSG00000051586|Vega:OTTMUSG00000023537	6	6|6 F1	microtubule associated monooxygenase, calponin and LIM domain containing 3		GO:0005654(nucleoplasm)//GO:0005886(plasma membrane)//GO:0005634(nucleus)//GO:0005856(cytoskeleton)//GO:0005737(cytoplasm)	GO:0018641(6-hydroxy-3-methyl-2-oxo-1,2-dihydroquinoline 6-monooxygenase activity)//GO:0017137(Rab GTPase binding)//GO:0018655(2-oxo-delta3-4,5,5-trimethylcyclopentenylacetyl-CoA 1,2-monooxygenase activity)//GO:0018633(dimethyl sulfide monooxygenase activity)//GO:0018651(toluene-4-sulfonate monooxygenase activity)//GO:0018643(carbon disulfide oxygenase activity)//GO:0018647(phenanthrene 1,2-monoo…	GO:0055114(oxidation-reduction process)//GO:0006887(exocytosis)//GO:0007010(cytoskeleton organization)//GO:0030042(actin filament depolymerization)
Bcl2l12	ENSMUSG00000003190	protein_coding	-	chr7:44986899-45002848	1.55267	1.19596	1.29826	0.376579	0.55915	0.999241	up	1.25863	1.28467	2.11471	0.985387	1.19122	1.41128	75736	2810475P17Rik|5430429M05Rik|Bcl-L12|Bcl2-L12	MGI:MGI:1922986|Ensembl:ENSMUSG00000003190|Vega:OTTMUSG00000023474	7	7|7 B2	BCL2-like 12 (proline rich)		GO:0016020(membrane)//GO:0005634(nucleus)	GO:0002039(p53 binding)	GO:1902166(negative regulation of intrinsic apoptotic signaling pathway in response to DNA damage by p53 class mediator)//GO:1990001(inhibition of cysteine-type endopeptidase activity involved in apoptotic process)//GO:0045944(positive regulation of transcription from RNA polymerase II promoter)//GO:0006915(apoptotic process)//GO:2000773(negative regulation of cellular senescence)//GO:0042981(reg…
Sh3gl1	ENSMUSG00000003200	protein_coding	-	chr17:56005710-56036637	1.68783	1.6578	1.01812	0.0259018	0.9624	0.999241	up	0.97464	2.18785	1.90101	1.88757	1.61272	1.47311	20405	C77078|EEN|SH3P8|Sh3d2b	MGI:MGI:700010|Ensembl:ENSMUSG00000003200	17	17 D|17 29.11 cM	SH3-domain GRB2-like 1	mmu04144(Endocytosis)	GO:0042995(cell projection)//GO:0005768(endosome)//GO:0030054(cell junction)//GO:0005737(cytoplasm)//GO:0016020(membrane)	GO:0008289(lipid binding)//GO:0051020(GTPase binding)//GO:0005515(protein binding)//GO:0042802(identical protein binding)//GO:0019902(phosphatase binding)	GO:0006897(endocytosis)
Ebi3	ENSMUSG00000003206	protein_coding	+	chr17:55952622-55967949	0	0	1	0	1	1	up	0	0	0	0	0	0	50498	EBI-3|IL-27	MGI:MGI:1354171|Ensembl:ENSMUSG00000003206	17	17 D|17 29.08 cM	Epstein-Barr virus induced gene 3		GO:0016020(membrane)//GO:0005576(extracellular region)//GO:0005615(extracellular space)	GO:0045523(interleukin-27 receptor binding)//GO:0004896(cytokine receptor activity)//GO:0005515(protein binding)//GO:0005125(cytokine activity)	GO:0042098(T cell proliferation)
Ccdc94	ENSMUSG00000003208	protein_coding	+	chr17:55952622-55967949	1.96652	1.3702	1.43521	0.521264	0.1671	0.999241	up	2.23017	2.30129	1.3681	1.44839	0.736092	1.92611	72886	2900016D05Rik|AI413813	MGI:MGI:1920136|Ensembl:ENSMUSG00000003208	17	17|17 D	coiled-coil domain containing 94		GO:0005575(cellular_component)	GO:0003674(molecular_function)	GO:0008150(biological_process)
Ranbp2	ENSMUSG00000003226	protein_coding	+	chr10:58446851-58494155	14.3697	13.321	1.07872	0.109322	0.56185	0.999241	up	13.4311	14.7206	14.9572	10.0764	13.72	16.1667	19386	A430087B05Rik|AI256741|NUP358	MGI:MGI:894323|Ensembl:ENSMUSG00000003226	10	10 B4|10 29.34 cM	RAN binding protein 2	mmu03013(RNA transport)	GO:0005739(mitochondrion)//GO:0016020(membrane)//GO:0005634(nucleus)//GO:0005643(nuclear pore)//GO:0005875(microtubule associated complex)	GO:0070740(tubulin-glutamic acid ligase activity)//GO:0008270(zinc ion binding)//GO:0070739(protein-glutamic acid ligase activity)//GO:0043773(coenzyme F420-0 gamma-glutamyl ligase activity)//GO:0008766(UDP-N-acetylmuramoylalanyl-D-glutamyl-2,6-diaminopimelate-D-alanyl-D-alanine ligase activity)//GO:0003723(RNA binding)//GO:0018169(ribosomal S6-glutamic acid ligase activity)//GO:0070735(protein-g…	GO:0090526(regulation of gluconeogenesis involved in cellular glucose homeostasis)//GO:0000413(protein peptidyl-prolyl isomerization)//GO:0033132(negative regulation of glucokinase activity)//GO:0051028(mRNA transport)//GO:0006457(protein folding)//GO:0016925(protein sumoylation)//GO:0006607(NLS-bearing protein import into nucleus)//GO:0006810(transport)//GO:0015031(protein transport)//GO:0046907…
Edar	ENSMUSG00000003227	protein_coding	-	chr10:58600788-58675654	0.0256663	0.0138977	1.84681	0.885033	1	1	up	0	0.0347347	0.0422642	0	0.041693	0	13608	ED1R|ED3|ED5|EDA-A1R|EDA3|dl	MGI:MGI:1343498|Ensembl:ENSMUSG00000003227|Vega:OTTMUSG00000025045	10	10 29.37 cM|10 B3	ectodysplasin-A receptor	mmu04060(Cytokine-cytokine receptor interaction)	GO:0016020(membrane)//GO:0005886(plasma membrane)//GO:0045177(apical part of cell)//GO:0016021(integral component of membrane)	GO:0004872(receptor activity)	GO:0010628(positive regulation of gene expression)//GO:0030154(cell differentiation)//GO:0060662(salivary gland cavitation)//GO:0042475(odontogenesis of dentin-containing tooth)//GO:0001942(hair follicle development)//GO:0046330(positive regulation of JNK cascade)//GO:0042346(positive regulation of NF-kappaB import into nucleus)//GO:0007275(multicellular organism development)//GO:0006915(apoptoti…
Dvl3	ENSMUSG00000003233	protein_coding	+	chr16:20511132-20532520	2.62101	2.26377	1.15781	0.211393	0.4295	0.999241	up	2.6975	2.73479	2.43072	1.76643	2.20759	2.8173	13544	-	MGI:MGI:108100|Ensembl:ENSMUSG00000003233|Vega:OTTMUSG00000035778	16	16 A3|16 12.46 cM	dishevelled segment polarity protein 3	mmu04310(Wnt signaling pathway)//mmu04330(Notch signaling pathway)//mmu04390(Hippo signaling pathway)//mmu04550(Signaling pathways regulating pluripotency of stem cells)//mmu04916(Melanogenesis)//mmu05166(HTLV-I infection)//mmu05200(Pathways in cancer)//mmu05217(Basal cell carcinoma)	GO:1990909(Wnt signalosome)//GO:0005829(cytosol)//GO:0005737(cytoplasm)//GO:0000790(nuclear chromatin)	GO:0002020(protease binding)//GO:0008013(beta-catenin binding)//GO:0005102(receptor binding)//GO:0046982(protein heterodimerization activity)//GO:0030674(protein binding, bridging)//GO:0048365(Rac GTPase binding)//GO:0005515(protein binding)//GO:0005109(frizzled binding)	GO:0035567(non-canonical Wnt signaling pathway)//GO:0043507(positive regulation of JUN kinase activity)//GO:1903827(regulation of cellular protein localization)//GO:0060070(canonical Wnt signaling pathway)//GO:0016055(Wnt signaling pathway)//GO:0003007(heart morphogenesis)//GO:0043547(positive regulation of GTPase activity)//GO:0090179(planar cell polarity pathway involved in neural tube closure)…
Sult2b1	ENSMUSG00000003271	protein_coding	-	chr7:45729982-45759612	0	0	1	0	1	1	up	0	0	0	0	0	0	54200	AI326997|BB173635|ST2B1|SULT2B	MGI:MGI:1926342|Ensembl:ENSMUSG00000003271	7	7|7 B4	sulfotransferase family, cytosolic, 2B, member 1	mmu00140(Steroid hormone biosynthesis)	GO:0005783(endoplasmic reticulum)//GO:0043231(intracellular membrane-bounded organelle)//GO:0070062(extracellular exosome)//GO:0005737(cytoplasm)	GO:0004027(alcohol sulfotransferase activity)//GO:0050294(steroid sulfotransferase activity)//GO:0008146(sulfotransferase activity)//GO:0016740(transferase activity)	GO:0006629(lipid metabolic process)//GO:0000103(sulfate assimilation)//GO:0008202(steroid metabolic process)
Car11	ENSMUSG00000003273	protein_coding	+	chr7:45699842-45704682	2.18859	1.89486	1.15502	0.207914	0.6005	0.999241	up	1.94437	2.31284	2.30857	1.82743	1.59003	2.26711	12348	Ca11	MGI:MGI:1336193|Ensembl:ENSMUSG00000003273	7	7|7 B2	carbonic anhydrase 11		GO:0016323(basolateral plasma membrane)//GO:0005576(extracellular region)	GO:0004089(carbonate dehydratase activity)	GO:0008150(biological_process)
Dlgap1	ENSMUSG00000003279	protein_coding	+	chr17:69969072-70821413	0.046538	0.0250149	1.86042	0.895625	1	1	up	0.039444	0.0713249	0.0288452	0.0152012	0.0284557	0.0313877	224997	4933422O14Rik|9630002F18|AI845682|AI848168|BB075781|D17Bwg0511e|GKAP/SAPAP|GKPA/SAPAP|Gkap|Sapap1|mKIAA4162	MGI:MGI:1346065|Ensembl:ENSMUSG00000003279|Vega:OTTMUSG00000033115	17	17 E1.3|17 40.85 cM	discs, large (Drosophila) homolog-associated protein 1	mmu04724(Glutamatergic synapse)	GO:0045202(synapse)//GO:0005886(plasma membrane)//GO:0016020(membrane)//GO:0014069(postsynaptic density)//GO:0030054(cell junction)//GO:0045211(postsynaptic membrane)	GO:0019904(protein domain specific binding)//GO:0032403(protein complex binding)	GO:0061136(regulation of proteasomal protein catabolic process)//GO:0070842(aggresome assembly)//GO:0007268(chemical synaptic transmission)//GO:0023052(signaling)//GO:0035418(protein localization to synapse)
Hck	ENSMUSG00000003283	protein_coding	+	chr2:153108467-153151441	0.118978	0.111584	1.06627	0.0925727	1	1	up	0.137817	0.0309388	0.18818	0.0397536	0.18563	0.109367	15162	AI849071|Bmk	MGI:MGI:96052|Ensembl:ENSMUSG00000003283|Vega:OTTMUSG00000015777	2	2 H1|2 75.41 cM	hemopoietic cell kinase	mmu04062(Chemokine signaling pathway)//mmu04666(Fc gamma R-mediated phagocytosis)	GO:0005764(lysosome)//GO:0005901(caveola)//GO:0016020(membrane)//GO:0005794(Golgi apparatus)//GO:0005886(plasma membrane)//GO:0005884(actin filament)//GO:0030054(cell junction)//GO:0005925(focal adhesion)//GO:0031410(cytoplasmic vesicle)//GO:0042995(cell projection)//GO:0005634(nucleus)//GO:0031234(extrinsic component of cytoplasmic side of plasma membrane)//GO:0005856(cytoskeleton)//GO:0005737(c…	GO:0004713(protein tyrosine kinase activity)//GO:0004715(non-membrane spanning protein tyrosine kinase activity)//GO:0004672(protein kinase activity)//GO:0000166(nucleotide binding)//GO:0005524(ATP binding)//GO:0016301(kinase activity)//GO:0005515(protein binding)//GO:0005102(receptor binding)//GO:0016740(transferase activity)	GO:0007169(transmembrane receptor protein tyrosine kinase signaling pathway)//GO:0016310(phosphorylation)//GO:0050830(defense response to Gram-positive bacterium)//GO:0043066(negative regulation of apoptotic process)//GO:0050764(regulation of phagocytosis)//GO:0006909(phagocytosis)//GO:0002376(immune system process)//GO:0071801(regulation of podosome assembly)//GO:0008360(regulation of cell shape…
Mrpl4	ENSMUSG00000003299	protein_coding	+	chr9:21002736-21008835	9.49002	9.19313	1.03229	0.0458549	0.84195	0.999241	up	9.76416	9.04377	9.66213	10.9035	9.9697	6.70616	66163	1110017G11Rik	MGI:MGI:2137210|Ensembl:ENSMUSG00000003299	9	9|9 A3	mitochondrial ribosomal protein L4	mmu03010(Ribosome)	GO:0022626(cytosolic ribosome)//GO:0030529(intracellular ribonucleoprotein complex)//GO:0005739(mitochondrion)//GO:0005840(ribosome)	GO:0044822(poly(A) RNA binding)//GO:0003723(RNA binding)//GO:0003735(structural constituent of ribosome)	GO:0006412(translation)
Ap1m2	ENSMUSG00000003309	protein_coding	-	chr9:21295456-21312333	0	0	1	0	1	1	up	0	0	0	0	0	0	11768	D9Ertd818e|[m]1B|mu1B	MGI:MGI:1336974|Ensembl:ENSMUSG00000003309	9	9 A3|9 7.76 cM	adaptor protein complex AP-1, mu 2 subunit	mmu04142(Lysosome)	GO:0030131(clathrin adaptor complex)//GO:0005802(trans-Golgi network)//GO:0016020(membrane)//GO:0005794(Golgi apparatus)//GO:0043231(intracellular membrane-bounded organelle)//GO:0031410(cytoplasmic vesicle)		GO:0016192(vesicle-mediated transport)//GO:0006810(transport)//GO:0015031(protein transport)//GO:0006886(intracellular protein transport)
Glg1	ENSMUSG00000003316	protein_coding	-	chr8:111153312-111259216	4.9272	4.06761	1.21133	0.276586	0.2734	0.999241	up	5.3862	5.13568	4.25972	3.0996	4.10988	4.99336	20340	AI593353|AW537898|CFR|CFR-1|ESL-1|MG-160|MG160|Selel	MGI:MGI:104967|Ensembl:ENSMUSG00000003316|Vega:OTTMUSG00000036006	8	8 E1|8 57.98 cM	golgi apparatus protein 1	mmu04514(Cell adhesion molecules (CAMs))	GO:0005886(plasma membrane)//GO:0070062(extracellular exosome)//GO:0016020(membrane)//GO:0005794(Golgi apparatus)//GO:0016021(integral component of membrane)//GO:0043231(intracellular membrane-bounded organelle)//GO:0005797(Golgi medial cisterna)//GO:0000139(Golgi membrane)//GO:0005578(proteinaceous extracellular matrix)	GO:0017134(fibroblast growth factor binding)	GO:0010955(negative regulation of protein processing)//GO:0032330(regulation of chondrocyte differentiation)//GO:0030512(negative regulation of transforming growth factor beta receptor signaling pathway)//GO:0060349(bone morphogenesis)
Csnk1g2	ENSMUSG00000003345	protein_coding	+	chr10:80622779-80640771	16.6154	14.8258	1.12071	0.164414	0.39135	0.999241	up	18.2275	17.5361	14.0826	15.136	14.8531	14.4882	103236	2810429I12Rik|AI463719	MGI:MGI:1920014|Ensembl:ENSMUSG00000003345	10	10|10 C1	casein kinase 1, gamma 2	mmu04340(Hedgehog signaling pathway)	GO:0016020(membrane)//GO:0005634(nucleus)//GO:0005737(cytoplasm)	GO:0004674(protein serine/threonine kinase activity)//GO:0004672(protein kinase activity)//GO:0000287(magnesium ion binding)//GO:0001948(glycoprotein binding)//GO:0000166(nucleotide binding)//GO:0051219(phosphoprotein binding)//GO:0016301(kinase activity)//GO:0042277(peptide binding)//GO:0005524(ATP binding)//GO:0016740(transferase activity)	GO:0006897(endocytosis)//GO:0008360(regulation of cell shape)//GO:0016310(phosphorylation)//GO:0006468(protein phosphorylation)//GO:0046777(protein autophosphorylation)//GO:0018105(peptidyl-serine phosphorylation)//GO:0016055(Wnt signaling pathway)
Mob3a	ENSMUSG00000003348	protein_coding	-	chr10:80681837-80701820	0.730647	0.697196	1.04798	0.0676104	0.85645	0.999241	up	0.914522	0.894889	0.38253	0.71432	0.493462	0.883806	208228	5330417K06Rik|A630029F06|AV218468|Mobkl2a	MGI:MGI:3050117|Ensembl:ENSMUSG00000003348	10	10|10 C1	MOB kinase activator 3A		GO:0005622(intracellular)	GO:0003674(molecular_function)//GO:0046872(metal ion binding)	GO:0008150(biological_process)
Fkbp11	ENSMUSG00000003355	protein_coding	-	chr15:98724372-98728198	0.212785	0.121299	1.75422	0.810832	1	1	up	0	0.397122	0.241233	0.128394	0.118964	0.116537	66120	1110002O23Rik|FKBP-11	MGI:MGI:1913370|Ensembl:ENSMUSG00000003355	15	15|15 F2	FK506 binding protein 11		GO:0016020(membrane)//GO:0016021(integral component of membrane)//GO:0005789(endoplasmic reticulum membrane)	GO:0005528(FK506 binding)//GO:0003755(peptidyl-prolyl cis-trans isomerase activity)//GO:0016853(isomerase activity)	GO:0061077(chaperone-mediated protein folding)//GO:0006457(protein folding)
Ddx23	ENSMUSG00000003360	protein_coding	-	chr15:98645133-98662889	16.329	14.9794	1.0901	0.124454	0.5435	0.999241	up	14.3646	18.3014	16.321	11.647	17.8596	15.4317	74351	3110082M05Rik|4921506D17Rik	MGI:MGI:1921601|Ensembl:ENSMUSG00000003360|Vega:OTTMUSG00000034981	15	15|15 F2	DEAD (Asp-Glu-Ala-Asp) box polypeptide 23	mmu03040(Spliceosome)	GO:0046540(U4/U6 x U5 tri-snRNP complex)//GO:0005682(U5 snRNP)//GO:0071013(catalytic step 2 spliceosome)//GO:0070062(extracellular exosome)//GO:0005730(nucleolus)//GO:0005634(nucleus)	GO:0044822(poly(A) RNA binding)//GO:0004004(ATP-dependent RNA helicase activity)	GO:0010501(RNA secondary structure unwinding)//GO:0000375(RNA splicing, via transesterification reactions)
Etv3	ENSMUSG00000003382	protein_coding	+	chr3:87525406-87540156	2.36763	2.13604	1.10842	0.148508	0.5073	0.999241	up	2.44218	2.24802	2.4127	1.92136	2.28886	2.19789	27049	AI414410|METS|Pe1	MGI:MGI:1350926|Ensembl:ENSMUSG00000003382|Vega:OTTMUSG00000026642	3	3|3 F1	ets variant 3		GO:0005634(nucleus)//GO:0017053(transcriptional repressor complex)//GO:0090571(RNA polymerase II transcription repressor complex)//GO:0000790(nuclear chromatin)	GO:0001227(transcriptional repressor activity, RNA polymerase II transcription regulatory region sequence-specific binding)//GO:0003700(transcription factor activity, sequence-specific DNA binding)//GO:0017151(DEAD/H-box RNA helicase binding)//GO:0000977(RNA polymerase II regulatory region sequence-specific DNA binding)//GO:0043565(sequence-specific DNA binding)//GO:0005515(protein binding)//GO:0…	GO:0006351(transcription, DNA-templated)//GO:0097011(cellular response to granulocyte macrophage colony-stimulating factor stimulus)//GO:0030154(cell differentiation)//GO:0008285(negative regulation of cell proliferation)//GO:0000122(negative regulation of transcription from RNA polymerase II promoter)//GO:0006355(regulation of transcription, DNA-templated)
Nosip	ENSMUSG00000003421	protein_coding	+	chr7:45053612-45078503	12.8087	10.9172	1.17326	0.230524	0.55835	0.999241	up	17.2776	10.9469	10.2017	13.8019	12.0558	6.89393	66394	2310061K06Rik|CGI-25	MGI:MGI:1913644|Ensembl:ENSMUSG00000003421	7	7|7 B2	nitric oxide synthase interacting protein		GO:0005634(nucleus)//GO:0005737(cytoplasm)	GO:0070740(tubulin-glutamic acid ligase activity)//GO:0070735(protein-glycine ligase activity)//GO:0070739(protein-glutamic acid ligase activity)//GO:0008766(UDP-N-acetylmuramoylalanyl-D-glutamyl-2,6-diaminopimelate-D-alanyl-D-alanine ligase activity)//GO:0070737(protein-glycine ligase activity, elongating)//GO:0018169(ribosomal S6-glutamic acid ligase activity)//GO:0043774(coenzyme F420-2 alpha-…	GO:0043086(negative regulation of catalytic activity)//GO:0007275(multicellular organism development)//GO:0050999(regulation of nitric-oxide synthase activity)//GO:0051001(negative regulation of nitric-oxide synthase activity)
Supt5	ENSMUSG00000003435	protein_coding	-	chr7:28314893-28338719	11.3578	10.8753	1.04436	0.0626243	0.7419	0.999241	up	11.6905	10.1466	12.2363	9.66789	11.2272	11.7308	20924	AL033283|AL033321|AU019549|Spt5|Supt5h	MGI:MGI:1202400|Ensembl:ENSMUSG00000003435|Vega:OTTMUSG00000059053	7	7 A3|7 16.68 cM	suppressor of Ty 5		GO:0005654(nucleoplasm)//GO:0005634(nucleus)//GO:0032044(DSIF complex)	GO:0044822(poly(A) RNA binding)//GO:0019899(enzyme binding)//GO:0003682(chromatin binding)//GO:0046982(protein heterodimerization activity)	GO:0032785(negative regulation of DNA-templated transcription, elongation)//GO:0006368(transcription elongation from RNA polymerase II promoter)//GO:0006351(transcription, DNA-templated)//GO:0032786(positive regulation of DNA-templated transcription, elongation)//GO:0032784(regulation of DNA-templated transcription, elongation)//GO:0045944(positive regulation of transcription from RNA polymerase …
Dll3	ENSMUSG00000003436	protein_coding	-	chr7:28293552-28302238	0	0	1	0	1	1	up	0	0	0	0	0	0	13389	pu|pudgy	MGI:MGI:1096877|Ensembl:ENSMUSG00000003436|Vega:OTTMUSG00000022517	7	7 A3|7 16.67 cM	delta-like 3 (Drosophila)	mmu04330(Notch signaling pathway)	GO:0016020(membrane)//GO:0016021(integral component of membrane)	GO:0005515(protein binding)//GO:0005509(calcium ion binding)//GO:0005112(Notch binding)	GO:0048339(paraxial mesoderm development)//GO:0050768(negative regulation of neurogenesis)//GO:0001709(cell fate determination)//GO:0001501(skeletal system development)//GO:0030154(cell differentiation)//GO:0001756(somitogenesis)//GO:0001701(in utero embryonic development)//GO:0007219(Notch signaling pathway)//GO:0050769(positive regulation of neurogenesis)//GO:0007275(multicellular organism deve…
Timm50	ENSMUSG00000003438	protein_coding	-	chr7:28305515-28312072	10.9312	10.2745	1.06391	0.0893771	0.67825	0.999241	up	10.5267	11.7087	10.5582	10.5291	9.9686	10.3259	66525	2810403L02Rik|AU015082|TIM50L	MGI:MGI:1913775|Ensembl:ENSMUSG00000003438|Vega:OTTMUSG00000029548	7	7|7 A3	translocase of inner mitochondrial membrane 50		GO:0005743(mitochondrial inner membrane)//GO:0016020(membrane)//GO:0016021(integral component of membrane)//GO:0005744(mitochondrial inner membrane presequence translocase complex)//GO:0005739(mitochondrion)//GO:0016607(nuclear speck)//GO:0005654(nucleoplasm)	GO:0043021(ribonucleoprotein complex binding)//GO:0004722(protein serine/threonine phosphatase activity)//GO:0004725(protein tyrosine phosphatase activity)//GO:0005134(interleukin-2 receptor binding)//GO:0004721(phosphoprotein phosphatase activity)	GO:0001836(release of cytochrome c from mitochondria)//GO:0006470(protein dephosphorylation)//GO:0007006(mitochondrial membrane organization)//GO:0006810(transport)//GO:0015031(protein transport)//GO:0030150(protein import into mitochondrial matrix)
Ncstn	ENSMUSG00000003458	protein_coding	-	chr1:172066012-172122330	7.26631	6.68552	1.08687	0.120183	0.81295	0.999241	up	6.8257	6.64028	8.33294	6.70239	7.06286	6.29131	59287	9430068N19Rik|AA727311|Aph2|D1Dau13e|Kiaa0253|Nct|mKIAA0253	MGI:MGI:1891700|Ensembl:ENSMUSG00000003458|Vega:OTTMUSG00000021508	1	1 H3|1 79.54 cM	nicastrin	mmu04330(Notch signaling pathway)//mmu05010(Alzheimer's disease)	GO:0005886(plasma membrane)//GO:0005887(integral component of plasma membrane)//GO:0016020(membrane)//GO:0005794(Golgi apparatus)//GO:0016021(integral component of membrane)//GO:0005765(lysosomal membrane)//GO:0070062(extracellular exosome)//GO:0005783(endoplasmic reticulum)//GO:0005925(focal adhesion)	GO:0008233(peptidase activity)//GO:0005515(protein binding)//GO:0004175(endopeptidase activity)	GO:0042098(T cell proliferation)//GO:0050673(epithelial cell proliferation)//GO:0007219(Notch signaling pathway)//GO:0006509(membrane protein ectodomain proteolysis)//GO:0043085(positive regulation of catalytic activity)//GO:0002262(myeloid cell homeostasis)//GO:0050435(beta-amyloid metabolic process)//GO:0016485(protein processing)
Phyhip	ENSMUSG00000003469	protein_coding	+	chr14:70457475-70468832	0.278916	0.00961337	29.0132	4.85864	1	1	up	0	0.754758	0.0819898	0.0288401	0	0	105653	AW049870|C630010D02Rik|Lnap1ip|PAHX-AP#1|PAHX-AP1	MGI:MGI:1860417|Ensembl:ENSMUSG00000003469|Vega:OTTMUSG00000034316	14	14|14 D2	phytanoyl-CoA hydroxylase interacting protein		GO:0005575(cellular_component)	GO:0005515(protein binding)	GO:0002230(positive regulation of defense response to virus by host)//GO:0098779(mitophagy in response to mitochondrial depolarization)//GO:0098792(xenophagy)
Crhr2	ENSMUSG00000003476	protein_coding	-	chr6:55090048-55133016	4.9057	4.76393	1.02976	0.0423072	0.8434	0.999241	up	5.92785	4.87237	3.91688	5.22169	4.83121	4.23889	12922	CRF-R2|CRFR2alpha|CRFR2beta|Crfr2	MGI:MGI:894312|Ensembl:ENSMUSG00000003476|Vega:OTTMUSG00000035963	6	6 B3|6 27.33 cM	corticotropin releasing hormone receptor 2	mmu04080(Neuroactive ligand-receptor interaction)	GO:0043679(axon terminus)//GO:0005886(plasma membrane)//GO:0043204(perikaryon)//GO:0009986(cell surface)//GO:0005791(rough endoplasmic reticulum)//GO:0016020(membrane)//GO:0030425(dendrite)//GO:0005794(Golgi apparatus)//GO:0016021(integral component of membrane)//GO:0043196(varicosity)//GO:0070852(cell body fiber)//GO:0005783(endoplasmic reticulum)//GO:0030424(axon)//GO:0043025(neuronal cell body)	GO:0017046(peptide hormone binding)//GO:0004871(signal transducer activity)//GO:0043404(corticotropin-releasing hormone receptor activity)//GO:0004930(G-protein coupled receptor activity)//GO:0004888(transmembrane signaling receptor activity)//GO:0005515(protein binding)//GO:0005179(hormone activity)//GO:0015056(corticotrophin-releasing factor receptor activity)	GO:0007015(actin filament organization)//GO:0032755(positive regulation of interleukin-6 production)//GO:0010460(positive regulation of heart rate)//GO:0014064(positive regulation of serotonin secretion)//GO:0007166(cell surface receptor signaling pathway)//GO:0016525(negative regulation of angiogenesis)//GO:2000293(negative regulation of defecation)//GO:0010629(negative regulation of gene expres…
Cyp4f18	ENSMUSG00000003484	protein_coding	-	chr8:71951037-72009626	0.160529	0.0969137	1.65642	0.728065	1	1	up	0.0429865	0.286431	0.152171	0.198258	0.0924831	0	72054	1810054N16Rik|Cyp4f3|Cypf18	MGI:MGI:1919304|Ensembl:ENSMUSG00000003484|Vega:OTTMUSG00000025159	8	8|8 C1	cytochrome P450, family 4, subfamily f, polypeptide 18	mmu00590(Arachidonic acid metabolism)//mmu01100(Metabolic pathways)	GO:0016021(integral component of membrane)//GO:0016020(membrane)//GO:0043231(intracellular membrane-bounded organelle)//GO:0005737(cytoplasm)//GO:0005783(endoplasmic reticulum)//GO:0016324(apical plasma membrane)	GO:0005506(iron ion binding)//GO:0052871(alpha-tocopherol omega-hydroxylase activity)//GO:0016709(oxidoreductase activity, acting on paired donors, with incorporation or reduction of molecular oxygen, NAD(P)H as one donor, and incorporation of one atom of oxygen)//GO:0050051(leukotriene-B4 20-monooxygenase activity)//GO:0016705(oxidoreductase activity, acting on paired donors, with incorporation …	GO:0055114(oxidation-reduction process)//GO:0042360(vitamin E metabolic process)//GO:0017144(drug metabolic process)//GO:0019369(arachidonic acid metabolic process)//GO:0042376(phylloquinone catabolic process)//GO:0036101(leukotriene B4 catabolic process)//GO:0042377(vitamin K catabolic process)//GO:0032305(positive regulation of icosanoid secretion)//GO:0008217(regulation of blood pressure)//GO:…
Psg18	ENSMUSG00000003505	protein_coding	-	chr7:18345421-18355009	0	0	1	0	1	1	up	0	0	0	0	0	0	26438	Cea-3|Cea3|mmCGM6	MGI:MGI:1347251|Ensembl:ENSMUSG00000003505|Vega:OTTMUSG00000043486	7	7 A2|7 9.15 cM	pregnancy specific glycoprotein 18				GO:0010628(positive regulation of gene expression)//GO:0009691(cytokinin biosynthetic process)//GO:2001179(regulation of interleukin-10 secretion)
Dusp3	ENSMUSG00000003518	protein_coding	-	chr11:101971142-101992264	39.1906	29.9861	1.30696	0.386214	0.0567	0.968752	up	42.7795	36.5706	38.2217	19.9514	29.3777	40.6292	72349	2210015O03Rik|5031436O03Rik|T-DSP11|VHR	MGI:MGI:1919599|Ensembl:ENSMUSG00000003518|Vega:OTTMUSG00000002139	11	11|11 D	dual specificity phosphatase 3 (vaccinia virus phosphatase VH1-related)	mmu04010(MAPK signaling pathway)	GO:0001772(immunological synapse)//GO:0070062(extracellular exosome)//GO:0005829(cytosol)//GO:0005654(nucleoplasm)//GO:0005634(nucleus)//GO:0005737(cytoplasm)	GO:0033549(MAP kinase phosphatase activity)//GO:0008138(protein tyrosine/serine/threonine phosphatase activity)//GO:0019901(protein kinase binding)//GO:0004721(phosphoprotein phosphatase activity)//GO:0016791(phosphatase activity)//GO:0016787(hydrolase activity)//GO:0004725(protein tyrosine phosphatase activity)	GO:0046329(negative regulation of JNK cascade)//GO:0050868(negative regulation of T cell activation)//GO:0016311(dephosphorylation)//GO:0001701(in utero embryonic development)//GO:0000188(inactivation of MAPK activity)//GO:0043409(negative regulation of MAPK cascade)//GO:0050860(negative regulation of T cell receptor signaling pathway)//GO:0070373(negative regulation of ERK1 and ERK2 cascade)//GO…
Prodh	ENSMUSG00000003526	protein_coding	-	chr16:18052859-18090203	4.46012	4.19069	1.06429	0.0898962	0.81875	0.999241	up	3.96208	4.99834	4.41995	3.8303	4.15288	4.58888	19125	Pro-1|Pro1|Ym24d07	MGI:MGI:97770|Ensembl:ENSMUSG00000003526|Vega:OTTMUSG00000028177	16	16 A3|16 11.19 cM	proline dehydrogenase	mmu00330(Arginine and proline metabolism)//mmu01100(Metabolic pathways)	GO:0005743(mitochondrial inner membrane)//GO:0005739(mitochondrion)	GO:0071949(FAD binding)//GO:0004657(proline dehydrogenase activity)//GO:0016491(oxidoreductase activity)//GO:0016597(amino acid binding)	GO:0055114(oxidation-reduction process)//GO:0006560(proline metabolic process)//GO:0006562(proline catabolic process)
Dgcr14	ENSMUSG00000003527	protein_coding	-	chr16:17900710-17911348	1.33048	1.19927	1.10941	0.149789	0.6194	0.999241	up	1.2826	1.47036	1.23848	0.987469	1.33033	1.28002	27886	AI462402|D16H22S1269E|Dgcr1|Dgsi|ES2|Es2el	MGI:MGI:107854|Ensembl:ENSMUSG00000003527	16	16 11.09 cM|16 B1-B3	DiGeorge syndrome critical region gene 14		GO:0071013(catalytic step 2 spliceosome)//GO:0005634(nucleus)//GO:0005681(spliceosomal complex)		GO:0006397(mRNA processing)//GO:0008380(RNA splicing)
Slc25a1	ENSMUSG00000003528	protein_coding	-	chr16:17925210-17928219	2.43108	2.27733	1.06751	0.0942557	0.82095	0.999241	up	4.82069	1.69824	0.774312	1.52341	2.19665	3.11191	13358	1300019P08Rik|2610100G11Rik|AI194714|Ctp|Dgsj|Slc20a3	MGI:MGI:1345283|Ensembl:ENSMUSG00000003528|Vega:OTTMUSG00000026786	16	16 B1|16 11.11 cM	solute carrier family 25 (mitochondrial carrier, citrate transporter), member 1		GO:0016020(membrane)//GO:0005743(mitochondrial inner membrane)//GO:0005739(mitochondrion)//GO:0016021(integral component of membrane)	GO:0003735(structural constituent of ribosome)	GO:0006412(translation)//GO:0055085(transmembrane transport)//GO:0006810(transport)
Dgcr6	ENSMUSG00000003531	protein_coding	+	chr16:18052859-18090203	7.97893	7.81989	1.02034	0.0290477	0.93535	0.999241	up	6.99989	10.1546	6.78235	8.74299	7.97325	6.74343	13353	-	MGI:MGI:1202877|Ensembl:ENSMUSG00000003531|Vega:OTTMUSG00000028179	16	16 11.19 cM|16 B2	DiGeorge syndrome critical region gene 6		GO:0005575(cellular_component)	GO:0003674(molecular_function)	GO:0008150(biological_process)
Ddr1	ENSMUSG00000003534	protein_coding	-	chr17:35681566-35708244	1.08195	0.819997	1.31945	0.399936	0.20935	0.999241	up	1.07817	1.22611	0.941562	0.383657	1.30644	0.769894	12305	6030432F18|AI323681|CD167a|Cak|Nep|PTK3A	MGI:MGI:99216|Ensembl:ENSMUSG00000003534|Vega:OTTMUSG00000031017	17	17 C|17 18.7 cM	discoidin domain receptor family, member 1		GO:0005886(plasma membrane)//GO:0005887(integral component of plasma membrane)//GO:0043235(receptor complex)//GO:0016020(membrane)//GO:0016021(integral component of membrane)//GO:0016323(basolateral plasma membrane)//GO:0070062(extracellular exosome)//GO:0005615(extracellular space)	GO:0004713(protein tyrosine kinase activity)//GO:0004672(protein kinase activity)//GO:0005518(collagen binding)//GO:0004714(transmembrane receptor protein tyrosine kinase activity)//GO:0000166(nucleotide binding)//GO:0016301(kinase activity)//GO:0046872(metal ion binding)//GO:0005524(ATP binding)//GO:0016740(transferase activity)//GO:0038062(protein tyrosine kinase collagen receptor activity)	GO:0044319(wound healing, spreading of cells)//GO:0007169(transmembrane receptor protein tyrosine kinase signaling pathway)//GO:0016310(phosphorylation)//GO:0008285(negative regulation of cell proliferation)//GO:0007595(lactation)//GO:0010715(regulation of extracellular matrix disassembly)//GO:0014909(smooth muscle cell migration)//GO:0038063(collagen-activated tyrosine kinase receptor signaling …
Ier3	ENSMUSG00000003541	protein_coding	+	chr17:35821683-35822923	4.40376	4.34525	1.01347	0.0192974	0.947	0.999241	up	4.18112	5.2975	3.73267	3.02501	5.05354	4.95721	15937	AI663993|IEX-1|cI-3|gly96	MGI:MGI:104814|Ensembl:ENSMUSG00000003541|Vega:OTTMUSG00000037405	17	17|17 B1	immediate early response 3		GO:0016020(membrane)//GO:0016021(integral component of membrane)//GO:0005634(nucleus)	GO:0005515(protein binding)	GO:0046822(regulation of nucleocytoplasmic transport)//GO:0045732(positive regulation of protein catabolic process)//GO:2001020(regulation of response to DNA damage stimulus)//GO:0003085(negative regulation of systemic arterial blood pressure)//GO:0050728(negative regulation of inflammatory response)//GO:0008630(intrinsic apoptotic signaling pathway in response to DNA damage)//GO:0045820(negative…
Klc4	ENSMUSG00000003546	protein_coding	-	chr17:45606434-46831413	2.40344	2.26476	1.06123	0.0857422	0.9638	0.999241	up	1.60388	3.3812	2.22526	2.34961	1.96231	2.48237	74764	1200014P03Rik|AA408085|AW146303|Knsl8	MGI:MGI:1922014|Ensembl:ENSMUSG00000003546	17	17|17 C	kinesin light chain 4	mmu05132(Salmonella infection)	GO:0005871(kinesin complex)//GO:0005575(cellular_component)//GO:0005856(cytoskeleton)//GO:0005737(cytoplasm)//GO:0005874(microtubule)	GO:0003674(molecular_function)//GO:0003777(microtubule motor activity)	GO:0008150(biological_process)
Ercc1	ENSMUSG00000003549	protein_coding	+	chr7:19344777-19356524	12.1067	10.7246	1.12887	0.174876	0.60235	0.999241	up	11.9966	10.9935	13.33	10.6874	13.7866	7.6998	13870	Ercc-1	MGI:MGI:95412|Ensembl:ENSMUSG00000003549|Vega:OTTMUSG00000030622	7	7 A3|7 9.6 cM	excision repair cross-complementing rodent repair deficiency, complementation group 1	mmu03420(Nucleotide excision repair)//mmu03460(Fanconi anemia pathway)	GO:0070522(ERCC4-ERCC1 complex)//GO:0005669(transcription factor TFIID complex)//GO:0000110(nucleotide-excision repair factor 1 complex)//GO:0000109(nucleotide-excision repair complex)//GO:0000784(nuclear chromosome, telomeric region)//GO:0005654(nucleoplasm)//GO:0005634(nucleus)//GO:0005737(cytoplasm)	GO:0019904(protein domain specific binding)//GO:0003684(damaged DNA binding)//GO:0001094(TFIID-class transcription factor binding)//GO:0000014(single-stranded DNA endodeoxyribonuclease activity)//GO:0043566(structure-specific DNA binding)//GO:0016787(hydrolase activity)//GO:0017025(TBP-class protein binding)//GO:0003697(single-stranded DNA binding)//GO:0004519(endonuclease activity)//GO:0004518(n…	GO:0006310(DNA recombination)//GO:0006979(response to oxidative stress)//GO:0007283(spermatogenesis)//GO:0032205(negative regulation of telomere maintenance)//GO:0008584(male gonad development)//GO:0010259(multicellular organism aging)//GO:1904431(positive regulation of t-circle formation)//GO:0006295(nucleotide-excision repair, DNA incision, 3'-to lesion)//GO:0006974(cellular response to DNA dam…
Homer3	ENSMUSG00000003573	protein_coding	+	chr8:70282826-70302489	1.03814	0.520581	1.9942	0.995812	0.24225	0.999241	up	0.494162	0.499104	2.12116	0.339553	0.640897	0.581292	26558	AW146114	MGI:MGI:1347359|Ensembl:ENSMUSG00000003573|Vega:OTTMUSG00000022250	8	8|8 C1	homer scaffolding protein 3	mmu04068(FoxO signaling pathway)//mmu04724(Glutamatergic synapse)	GO:0045202(synapse)//GO:0005886(plasma membrane)//GO:0016020(membrane)//GO:0005829(cytosol)//GO:0014069(postsynaptic density)//GO:0030054(cell junction)//GO:0045178(basal part of cell)//GO:0045211(postsynaptic membrane)//GO:0005737(cytoplasm)	GO:0035256(G-protein coupled glutamate receptor binding)//GO:0005515(protein binding)//GO:0019904(protein domain specific binding)//GO:0008022(protein C-terminus binding)	GO:0007216(G-protein coupled glutamate receptor signaling pathway)
Rnf215	ENSMUSG00000003581	protein_coding	+	chr11:4135201-4160293	2.3781	2.25666	1.05381	0.0756204	0.8616	0.999241	up	2.6995	2.44686	1.98795	3.39956	1.46032	1.91011	71673	0610009J22Rik|AW557025|C77903	MGI:MGI:1918923|Ensembl:ENSMUSG00000003581|Vega:OTTMUSG00000005052	11	11|11 A1	ring finger protein 215		GO:0016020(membrane)//GO:0016021(integral component of membrane)//GO:0005575(cellular_component)	GO:0003674(molecular_function)//GO:0008270(zinc ion binding)//GO:0046872(metal ion binding)	GO:0008150(biological_process)
Sec14l2	ENSMUSG00000003585	protein_coding	-	chr11:4097038-4123415	0.215175	0.204046	1.05454	0.0766138	1	1	up	0.359962	0.218805	0.0667568	0.0707046	0.262434	0.279	67815	1300013M05Rik|Spf|TAP	MGI:MGI:1915065|Ensembl:ENSMUSG00000003585|Vega:OTTMUSG00000005050	11	11|11 A1	SEC14-like lipid binding 2		GO:0016021(integral component of membrane)//GO:0070062(extracellular exosome)//GO:0005829(cytosol)//GO:0005622(intracellular)//GO:0005634(nucleus)//GO:0005737(cytoplasm)	GO:0008289(lipid binding)//GO:0005215(transporter activity)//GO:0016765(transferase activity, transferring alkyl or aryl (other than methyl) groups)//GO:0008047(enzyme activator activity)	GO:0045542(positive regulation of cholesterol biosynthetic process)//GO:0006810(transport)//GO:0006351(transcription, DNA-templated)//GO:0006355(regulation of transcription, DNA-templated)
Aven	ENSMUSG00000003604	protein_coding	+	chr2:112492963-113217096	8.3414	7.30088	1.14252	0.192219	0.52605	0.999241	up	8.5596	8.31876	8.14584	8.18292	5.7469	7.97282	74268	1700013A01Rik|1700056A21Rik|mAven-L|mAven-S	MGI:MGI:1921518|Ensembl:ENSMUSG00000003604|Vega:OTTMUSG00000015148	2	2|2 E4	apoptosis, caspase activation inhibitor		GO:0005622(intracellular)//GO:0016020(membrane)	GO:0003674(molecular_function)	GO:0006915(apoptotic process)//GO:0043066(negative regulation of apoptotic process)
Cp	ENSMUSG00000003617	protein_coding	+	chr3:19733966-20043836	6.37114	6.26633	1.01673	0.0239308	0.95075	0.999241	up	7.6601	7.18066	4.27266	8.73759	5.20506	4.85634	12870	D3Ertd555e	MGI:MGI:88476|Ensembl:ENSMUSG00000003617|Vega:OTTMUSG00000023513	3	3|3 D	ceruloplasmin	mmu00860(Porphyrin and chlorophyll metabolism)	GO:0070062(extracellular exosome)//GO:0005576(extracellular region)//GO:0005765(lysosomal membrane)//GO:0072562(blood microparticle)//GO:0005615(extracellular space)//GO:0046658(anchored component of plasma membrane)	GO:0005507(copper ion binding)//GO:0051087(chaperone binding)//GO:0016491(oxidoreductase activity)//GO:0004322(ferroxidase activity)//GO:0046872(metal ion binding)	GO:0055114(oxidation-reduction process)//GO:0046688(response to copper ion)//GO:0006879(cellular iron ion homeostasis)//GO:0006810(transport)//GO:0006825(copper ion transport)//GO:0006811(ion transport)
Rps6ka1	ENSMUSG00000003644	protein_coding	-	chr4:133847289-133887797	1.1326	1.05381	1.07477	0.104034	0.8016	0.999241	up	1.55967	0.960069	0.87807	0.624625	0.878648	1.65815	20111	Mapkapk-1a|Rsk|Rsk-1|Rsk1|S6K-alpha-1|p90-Rsk1|p90Rsk1|p90S6K|p90rsk	MGI:MGI:104558|Ensembl:ENSMUSG00000003644|Vega:OTTMUSG00000009632	4	4|4 D3	ribosomal protein S6 kinase polypeptide 1	mmu04010(MAPK signaling pathway)//mmu04114(Oocyte meiosis)//mmu04150(mTOR signaling pathway)//mmu04720(Long-term potentiation)//mmu04722(Neurotrophin signaling pathway)//mmu04914(Progesterone-mediated oocyte maturation)//mmu04931(Insulin resistance)	GO:0005819(spindle)//GO:0005634(nucleus)//GO:0005737(cytoplasm)	GO:0004674(protein serine/threonine kinase activity)//GO:0004672(protein kinase activity)//GO:0000287(magnesium ion binding)//GO:0016301(kinase activity)//GO:0004712(protein serine/threonine/tyrosine kinase activity)//GO:0000166(nucleotide binding)//GO:0008134(transcription factor binding)//GO:0043027(cysteine-type endopeptidase inhibitor activity involved in apoptotic process)//GO:0005524(ATP bi…	GO:0016310(phosphorylation)//GO:0006468(protein phosphorylation)//GO:0072574(hepatocyte proliferation)//GO:2000491(positive regulation of hepatic stellate cell activation)//GO:0045944(positive regulation of transcription from RNA polymerase II promoter)//GO:0043066(negative regulation of apoptotic process)//GO:0043154(negative regulation of cysteine-type endopeptidase activity involved in apoptot…
Calb2	ENSMUSG00000003657	protein_coding	-	chr8:110142538-110168206	0	0	1	0	1	1	up	0	0	0	0	0	0	12308	CR	MGI:MGI:101914|Ensembl:ENSMUSG00000003657	8	8|8 E1	calbindin 2		GO:0005921(gap junction)//GO:0043005(neuron projection)//GO:0005623(cell)//GO:0005829(cytosol)//GO:0045202(synapse)//GO:0005634(nucleus)//GO:0005737(cytoplasm)//GO:0043195(terminal bouton)	GO:0046872(metal ion binding)//GO:0005509(calcium ion binding)	GO:0051480(regulation of cytosolic calcium ion concentration)
Snrnp200	ENSMUSG00000003660	protein_coding	+	chr2:127208385-127240451	10.383	9.72448	1.06772	0.0945302	0.78825	0.999241	up	12.8394	8.70171	9.60788	6.86689	13.895	8.41154	320632	A330064G03Rik|Ascc3l1|BC011390|HELIC2|U5-200-KD|U5-200KD	MGI:MGI:2444401|Ensembl:ENSMUSG00000003660|Vega:OTTMUSG00000016015	2	2 F1|2 61.84 cM	small nuclear ribonucleoprotein 200 (U5)	mmu03040(Spliceosome)	GO:0030529(intracellular ribonucleoprotein complex)//GO:0005682(U5 snRNP)//GO:0071013(catalytic step 2 spliceosome)//GO:0016020(membrane)//GO:0005654(nucleoplasm)//GO:0005634(nucleus)//GO:0005681(spliceosomal complex)	GO:0003676(nucleic acid binding)//GO:0008026(ATP-dependent helicase activity)//GO:0005524(ATP binding)//GO:0042802(identical protein binding)//GO:0004386(helicase activity)//GO:0000166(nucleotide binding)//GO:0044822(poly(A) RNA binding)//GO:0004004(ATP-dependent RNA helicase activity)//GO:0016787(hydrolase activity)	GO:0006397(mRNA processing)//GO:0000398(mRNA splicing, via spliceosome)//GO:0001649(osteoblast differentiation)//GO:0008380(RNA splicing)
Has1	ENSMUSG00000003665	protein_coding	-	chr17:17843327-17870936	0.012558	0	inf	inf	1	1	up	0	0	0.037674	0	0	0	15116	HAS	MGI:MGI:106590|Ensembl:ENSMUSG00000003665	17	17 A3.2|17 10.53 cM	hyaluronan synthase1		GO:0016020(membrane)//GO:0016021(integral component of membrane)//GO:0005887(integral component of plasma membrane)//GO:0005737(cytoplasm)	GO:0050501(hyaluronan synthase activity)//GO:0016757(transferase activity, transferring glycosyl groups)//GO:0016740(transferase activity)	GO:0036120(cellular response to platelet-derived growth factor stimulus)//GO:0045226(extracellular polysaccharide biosynthetic process)//GO:0007155(cell adhesion)//GO:0010764(negative regulation of fibroblast migration)//GO:0030213(hyaluronan biosynthetic process)//GO:0085029(extracellular matrix assembly)
Taf6l	ENSMUSG00000003680	protein_coding	-	chr19:8772521-8786417	0.640047	0.595956	1.07398	0.102973	1	1	up	1.01583	0.61132	0.292996	0.822925	0.328699	0.636244	225895	2810417N14Rik|BB223262|C530024J06Rik|Paf65a	MGI:MGI:2444957|Ensembl:ENSMUSG00000003680|Vega:OTTMUSG00000042231	19	19|19 A	TATA-box binding protein associated factor 6 like	mmu03022(Basal transcription factors)//mmu05168(Herpes simplex infection)	GO:0030914(STAGA complex)//GO:0070062(extracellular exosome)	GO:0004402(histone acetyltransferase activity)//GO:0003713(transcription coactivator activity)	GO:0043966(histone H3 acetylation)
Insig2	ENSMUSG00000003721	protein_coding	-	chr1:121304352-121332589	25.4619	20.8494	1.22123	0.288336	0.2684	0.999241	up	21.9432	28.43	26.0125	19.0725	18.1397	25.3359	72999	2900053I11Rik|C730043J18Rik|Insig-2	MGI:MGI:1920249|Ensembl:ENSMUSG00000003721|Vega:OTTMUSG00000034839	1	1|1 E2	insulin induced gene 2		GO:0005783(endoplasmic reticulum)//GO:0016020(membrane)//GO:0016021(integral component of membrane)//GO:0032937(SREBP-SCAP-Insig complex)	GO:0008134(transcription factor binding)//GO:0005515(protein binding)	GO:0042472(inner ear morphogenesis)//GO:0060021(palate development)//GO:0045717(negative regulation of fatty acid biosynthetic process)//GO:0006641(triglyceride metabolic process)//GO:0006991(response to sterol depletion)//GO:0042474(middle ear morphogenesis)//GO:0006695(cholesterol biosynthetic process)//GO:0008203(cholesterol metabolic process)//GO:0016126(sterol biosynthetic process)//GO:00066…
Kpna6	ENSMUSG00000003731	protein_coding	-	chr4:129626077-129672767	18.0572	15.6332	1.15505	0.207957	0.4506	0.999241	up	20.2065	15.8224	18.1425	11.8625	17.7685	17.2686	16650	IPOA7|Kpna5|NPI-2	MGI:MGI:1100836|Ensembl:ENSMUSG00000003731|Vega:OTTMUSG00000009518	4	4|4 D2.3	karyopherin (importin) alpha 6		GO:0016020(membrane)//GO:0005829(cytosol)//GO:0005643(nuclear pore)//GO:0005654(nucleoplasm)//GO:0005634(nucleus)//GO:0005737(cytoplasm)	GO:0008139(nuclear localization sequence binding)//GO:0005515(protein binding)//GO:0008565(protein transporter activity)	GO:0006606(protein import into nucleus)//GO:0060135(maternal process involved in female pregnancy)//GO:0045944(positive regulation of transcription from RNA polymerase II promoter)//GO:0006607(NLS-bearing protein import into nucleus)//GO:0006810(transport)//GO:0015031(protein transport)
Itpkc	ENSMUSG00000003752	protein_coding	-	chr7:27207092-27228628	0.793447	0.542731	1.46195	0.547897	0.2326	0.999241	up	0.737767	1.04851	0.594061	0.376009	0.492277	0.759906	233011	9130023N17Rik	MGI:MGI:2442554|Ensembl:ENSMUSG00000003752|Vega:OTTMUSG00000023456	7	7|7 A3	inositol 1,4,5-trisphosphate 3-kinase C	mmu00562(Inositol phosphate metabolism)//mmu01100(Metabolic pathways)//mmu04020(Calcium signaling pathway)//mmu04070(Phosphatidylinositol signaling system)	GO:0005654(nucleoplasm)//GO:0005634(nucleus)//GO:0005737(cytoplasm)	GO:0005524(ATP binding)//GO:0005516(calmodulin binding)//GO:0000166(nucleotide binding)//GO:0016301(kinase activity)//GO:0008440(inositol-1,4,5-trisphosphate 3-kinase activity)//GO:0005515(protein binding)//GO:0016740(transferase activity)	GO:0016310(phosphorylation)//GO:0002230(positive regulation of defense response to virus by host)//GO:0098779(mitophagy in response to mitochondrial depolarization)//GO:0098792(xenophagy)
Adck4	ENSMUSG00000003762	protein_coding	+	chr7:27233022-27282144	0.626762	0.579593	1.08138	0.112878	1	1	up	0.863747	0.590091	0.426449	1.13383	0.313651	0.291301	76889	0610012P18Rik	MGI:MGI:1924139|Ensembl:ENSMUSG00000003762|Vega:OTTMUSG00000023773	7	7|7 A3	aarF domain containing kinase 4		GO:0005886(plasma membrane)//GO:0016020(membrane)//GO:0005575(cellular_component)//GO:0016021(integral component of membrane)//GO:0005739(mitochondrion)//GO:0005737(cytoplasm)	GO:0004674(protein serine/threonine kinase activity)//GO:0008545(JUN kinase kinase activity)//GO:0004704(NF-kappaB-inducing kinase activity)//GO:0016301(kinase activity)//GO:0004675(transmembrane receptor protein serine/threonine kinase activity)//GO:0004698(calcium-dependent protein kinase C activity)//GO:0019912(cyclin-dependent protein kinase activating kinase activity)//GO:0003674(molecular_f…	GO:0016310(phosphorylation)//GO:0008150(biological_process)
Brd8	ENSMUSG00000003778	protein_coding	-	chr18:34598614-34624601	4.99505	4.4014	1.13488	0.182537	0.4401	0.999241	up	4.59689	4.88765	5.5006	3.32393	4.77064	5.10963	78656	2610007E11Rik|4432404P07Rik|SMAP	MGI:MGI:1925906|Ensembl:ENSMUSG00000003778|Vega:OTTMUSG00000017276	18	18|18 B1	bromodomain containing 8		GO:0005654(nucleoplasm)//GO:0035267(NuA4 histone acetyltransferase complex)//GO:0005634(nucleus)//GO:0005739(mitochondrion)//GO:0000812(Swr1 complex)	GO:0003674(molecular_function)	GO:0016568(chromatin modification)//GO:0006351(transcription, DNA-templated)//GO:0040008(regulation of growth)//GO:0043968(histone H2A acetylation)//GO:0045944(positive regulation of transcription from RNA polymerase II promoter)//GO:0043967(histone H4 acetylation)//GO:0006355(regulation of transcription, DNA-templated)
Kif20a	ENSMUSG00000003779	protein_coding	+	chr18:34624623-34651735	0.253253	0.156385	1.61942	0.695476	1	1	up	0.354356	0.319136	0.0862674	0.068239	0.212755	0.188162	19348	AA415432|Rab6kifl	MGI:MGI:1201682|Ensembl:ENSMUSG00000003779	18	18 B1|18 18.69 cM	kinesin family member 20A		GO:0005871(kinesin complex)//GO:0005874(microtubule)//GO:0005794(Golgi apparatus)//GO:0030496(midbody)//GO:0005819(spindle)//GO:0005856(cytoskeleton)//GO:0005737(cytoplasm)	GO:0019901(protein kinase binding)//GO:0003777(microtubule motor activity)//GO:0005524(ATP binding)//GO:0000166(nucleotide binding)//GO:0016887(ATPase activity)//GO:0008017(microtubule binding)	GO:0007018(microtubule-based movement)//GO:0000281(mitotic cytokinesis)//GO:0001578(microtubule bundle formation)//GO:0006810(transport)//GO:0015031(protein transport)//GO:0000910(cytokinesis)//GO:0000920(cell separation after cytokinesis)
Rad23a	ENSMUSG00000003813	protein_coding	-	chr8:84815404-84840665	36.0804	34.4886	1.04615	0.0650954	0.76945	0.999241	up	34.4212	37.0297	36.7904	30.592	37.7336	35.1404	19358	2310040P19Rik|AL024030|HR23A|mHR23A	MGI:MGI:105126|Ensembl:ENSMUSG00000003813|Vega:OTTMUSG00000022270	8	8|8 C3	RAD23 homolog A, nucleotide excision repair protein	mmu03420(Nucleotide excision repair)//mmu04141(Protein processing in endoplasmic reticulum)	GO:0005634(nucleus)//GO:0000502(proteasome complex)	GO:1990381(ubiquitin-specific protease binding)//GO:0031593(polyubiquitin binding)//GO:0003684(damaged DNA binding)	GO:0006974(cellular response to DNA damage stimulus)//GO:0032434(regulation of proteasomal ubiquitin-dependent protein catabolic process)//GO:0006289(nucleotide-excision repair)//GO:0043161(proteasome-mediated ubiquitin-dependent protein catabolic process)//GO:0045070(positive regulation of viral genome replication)//GO:0006281(DNA repair)
Calr	ENSMUSG00000003814	protein_coding	-	chr8:84841849-84846934	72.5266	72.1302	1.0055	0.00790676	0.97095	0.999241	up	73.1776	71.1421	73.2601	59.1499	79.3577	77.883	12317	CRT|Calregulin	MGI:MGI:88252|Ensembl:ENSMUSG00000003814|Vega:OTTMUSG00000022277	8	8 C3|8 41.21 cM	calreticulin	mmu04141(Protein processing in endoplasmic reticulum)//mmu04145(Phagosome)//mmu04612(Antigen processing and presentation)//mmu05142(Chagas disease (American trypanosomiasis))//mmu05166(HTLV-I infection)	GO:0016529(sarcoplasmic reticulum)//GO:0009897(external side of plasma membrane)//GO:0042824(MHC class I peptide loading complex)//GO:0009986(cell surface)//GO:0005790(smooth endoplasmic reticulum)//GO:0001669(acrosomal vesicle)//GO:0043234(protein complex)//GO:0005794(Golgi apparatus)//GO:0043231(intracellular membrane-bounded organelle)//GO:0005829(cytosol)//GO:0005844(polysome)//GO:0005788(end…	GO:0031625(ubiquitin protein ligase binding)//GO:0051082(unfolded protein binding)//GO:0050681(androgen receptor binding)//GO:0042277(peptide binding)//GO:0042562(hormone binding)//GO:0003729(mRNA binding)//GO:0005506(iron ion binding)//GO:0030246(carbohydrate binding)//GO:0005178(integrin binding)//GO:0044822(poly(A) RNA binding)//GO:0046872(metal ion binding)//GO:0005515(protein binding)//GO:00…	GO:0010628(positive regulation of gene expression)//GO:0090398(cellular senescence)//GO:2000510(positive regulation of dendritic cell chemotaxis)//GO:0006457(protein folding)//GO:0033144(negative regulation of intracellular steroid hormone receptor signaling pathway)//GO:1900026(positive regulation of substrate adhesion-dependent cell spreading)//GO:0000122(negative regulation of transcription fr…
Nqo1	ENSMUSG00000003849	protein_coding	-	chr8:107385117-107403206	15.9789	15.8564	1.00772	0.011099	0.9564	0.999241	up	14.4335	19.2255	14.2776	14.0065	13.8286	19.7341	18104	AV001255|Dia4|Dtd|Nmo-1|Nmo1|Nmor1|Ox-1|Ox1|Qr1	MGI:MGI:103187|Ensembl:ENSMUSG00000003849|Vega:OTTMUSG00000022884	8	8 D3|8 54.08 cM	NAD(P)H dehydrogenase, quinone 1	mmu00130(Ubiquinone and other terpenoid-quinone biosynthesis)	GO:0070062(extracellular exosome)//GO:0043025(neuronal cell body)//GO:0005737(cytoplasm)//GO:0005829(cytosol)	GO:0003955(NAD(P)H dehydrogenase (quinone) activity)//GO:0044822(poly(A) RNA binding)//GO:0016491(oxidoreductase activity)//GO:0042802(identical protein binding)//GO:0004784(superoxide dismutase activity)	GO:0055114(oxidation-reduction process)//GO:0043086(negative regulation of catalytic activity)//GO:0006801(superoxide metabolic process)//GO:0006979(response to oxidative stress)//GO:0043525(positive regulation of neuron apoptotic process)//GO:0043066(negative regulation of apoptotic process)
Ppfia3	ENSMUSG00000003863	protein_coding	-	chr7:45339125-45370583	0.0791266	0.00646757	12.2344	3.61287	1	1	up	0	0.23738	0	0	0.0194027	0	76787	2410127E16Rik	MGI:MGI:1924037|Ensembl:ENSMUSG00000003863	7	7|7 B4	protein tyrosine phosphatase, receptor type, f polypeptide (PTPRF), interacting protein (liprin), alpha 3		GO:0048786(presynaptic active zone)//GO:0005737(cytoplasm)	GO:0003674(molecular_function)	GO:0048172(regulation of short-term neuronal synaptic plasticity)//GO:0007269(neurotransmitter secretion)
Bax	ENSMUSG00000003873	protein_coding	-	chr7:45461694-45466898	3.74609	2.7782	1.34839	0.431234	0.2044	0.999241	up	2.82888	5.35346	3.05593	3.03684	2.81973	2.47803	12028	-	MGI:MGI:99702|Ensembl:ENSMUSG00000003873	7	7 29.32 cM|7 B5	BCL2-associated X protein	mmu04071(Sphingolipid signaling pathway)//mmu04115(p53 signaling pathway)//mmu04141(Protein processing in endoplasmic reticulum)//mmu04210(Apoptosis)//mmu04211(Longevity regulating pathway - mammal)//mmu04722(Neurotrophin signaling pathway)//mmu04932(Non-alcoholic fatty liver disease (NAFLD))//mmu04933(AGE-RAGE signaling pathway in diabetic complications)//mmu05014(Amyotrophic lateral sclerosis (…	GO:0005757(mitochondrial permeability transition pore complex)//GO:0046930(pore complex)//GO:0005635(nuclear envelope)//GO:0016020(membrane)//GO:0097144(BAX complex)//GO:0048471(perinuclear region of cytoplasm)//GO:0005789(endoplasmic reticulum membrane)//GO:0016021(integral component of membrane)//GO:0005829(cytosol)//GO:0005739(mitochondrion)//GO:0005741(mitochondrial outer membrane)//GO:009713…	GO:0051400(BH domain binding)//GO:0032403(protein complex binding)//GO:0042803(protein homodimerization activity)//GO:0051434(BH3 domain binding)//GO:0046982(protein heterodimerization activity)//GO:0042802(identical protein binding)//GO:0008289(lipid binding)//GO:0051087(chaperone binding)//GO:0031072(heat shock protein binding)//GO:0015267(channel activity)//GO:0005515(protein binding)	GO:0008584(male gonad development)//GO:0070584(mitochondrion morphogenesis)//GO:0043281(regulation of cysteine-type endopeptidase activity involved in apoptotic process)//GO:0009611(response to wounding)//GO:0008053(mitochondrial fusion)//GO:0097192(extrinsic apoptotic signaling pathway in absence of ligand)//GO:0008637(apoptotic mitochondrial changes)//GO:0048087(positive regulation of developme…
Il7r	ENSMUSG00000003882	protein_coding	-	chr15:9506160-9529876	0.0783361	0.0559243	1.40075	0.486202	1	1	up	0.131842	0.0791044	0.0240619	0.0507677	0.0237366	0.0932686	16197	CD127|IL-7Ralpha	MGI:MGI:96562|Ensembl:ENSMUSG00000003882	15	15 A1|15 4.16 cM	interleukin 7 receptor	mmu04060(Cytokine-cytokine receptor interaction)//mmu04068(FoxO signaling pathway)//mmu04151(PI3K-Akt signaling pathway)//mmu04630(Jak-STAT signaling pathway)//mmu04640(Hematopoietic cell lineage)//mmu05340(Primary immunodeficiency)	GO:0016020(membrane)//GO:0009897(external side of plasma membrane)//GO:0016021(integral component of membrane)	GO:0004896(cytokine receptor activity)	GO:0042100(B cell proliferation)//GO:0000902(cell morphogenesis)//GO:0043029(T cell homeostasis)//GO:0008361(regulation of cell size)//GO:0010628(positive regulation of gene expression)//GO:0048872(homeostasis of number of cells)//GO:0030217(T cell differentiation)//GO:0033089(positive regulation of T cell differentiation in thymus)//GO:0001915(negative regulation of T cell mediated cytotoxicity)…
Tfam	ENSMUSG00000003923	protein_coding	-	chr10:71225463-71238280	50.7307	42.0621	1.20609	0.270338	0.322	0.999241	up	52.4246	59.3691	40.3986	44.8522	42.0121	39.3222	21780	AI661103|Hmgts|mtTFA|tsHMG	MGI:MGI:107810|Ensembl:ENSMUSG00000003923|Vega:OTTMUSG00000031039	10	10 B5|10 36.83 cM	transcription factor A, mitochondrial	mmu05016(Huntington's disease)	GO:0042645(mitochondrial nucleoid)//GO:0005739(mitochondrion)//GO:0005667(transcription factor complex)//GO:0005634(nucleus)	GO:0001223(transcription coactivator binding)//GO:0000978(RNA polymerase II core promoter proximal region sequence-specific DNA binding)//GO:0003700(transcription factor activity, sequence-specific DNA binding)//GO:0003682(chromatin binding)//GO:0070363(mitochondrial light strand promoter sense binding)//GO:0031072(heat shock protein binding)//GO:0044822(poly(A) RNA binding)//GO:0008301(DNA bindi…	GO:0033108(mitochondrial respiratory chain complex assembly)//GO:0006390(transcription from mitochondrial promoter)//GO:0006351(transcription, DNA-templated)//GO:0006391(transcription initiation from mitochondrial promoter)//GO:0045944(positive regulation of transcription from RNA polymerase II promoter)//GO:0006355(regulation of transcription, DNA-templated)//GO:0045893(positive regulation of tr…
Zfp81	ENSMUSG00000003929	protein_coding	-	chr17:33329341-33358878	0.99177	0.833325	1.19014	0.251126	0.3428	0.999241	up	1.28911	0.952321	0.733877	0.569755	0.923646	1.00657	224694	AA409460|AA409461|C330034P10Rik|D330034E10Rik|Hszfp36|KRAB13|Zfp78	MGI:MGI:1890752|Ensembl:ENSMUSG00000003929|Vega:OTTMUSG00000033065	17	17|17 B1	zinc finger protein 81		GO:0005575(cellular_component)	GO:0003674(molecular_function)	GO:0008150(biological_process)
Mmd	ENSMUSG00000003948	protein_coding	+	chr11:90187682-90278589	7.50292	5.13516	1.46109	0.547042	0.0207	0.746241	up	10.7642	7.12965	4.61494	3.41287	7.51021	4.48241	67468	1200017E07Rik|1810073C06Rik|AA690185	MGI:MGI:1914718|Ensembl:ENSMUSG00000003948|Vega:OTTMUSG00000001286	11	11|11 C	monocyte to macrophage differentiation-associated		GO:0005768(endosome)//GO:0005764(lysosome)//GO:0005794(Golgi apparatus)//GO:0016021(integral component of membrane)//GO:0016020(membrane)	GO:0004672(protein kinase activity)	GO:0019835(cytolysis)//GO:0045666(positive regulation of neuron differentiation)//GO:0032880(regulation of protein localization)//GO:0045860(positive regulation of protein kinase activity)
Hlf	ENSMUSG00000003949	protein_coding	-	chr11:90336535-90390895	3.71847	3.63775	1.02219	0.0316622	0.8941	0.999241	up	4.34638	3.7518	3.05722	2.96652	3.00232	4.9444	217082	E230015K02Rik	MGI:MGI:96108|Ensembl:ENSMUSG00000003949|Vega:OTTMUSG00000001287	11	11 C-D|11 55.03 cM	hepatic leukemia factor		GO:0005634(nucleus)	GO:0001077(transcriptional activator activity, RNA polymerase II core promoter proximal region sequence-specific binding)//GO:0043565(sequence-specific DNA binding)//GO:0003700(transcription factor activity, sequence-specific DNA binding)//GO:0000977(RNA polymerase II regulatory region sequence-specific DNA binding)//GO:0003677(DNA binding)	GO:0035914(skeletal muscle cell differentiation)//GO:0006351(transcription, DNA-templated)//GO:0006355(regulation of transcription, DNA-templated)//GO:0048511(rhythmic process)
Fam162a	ENSMUSG00000003955	protein_coding	-	chr16:36043843-36071515	92.3167	92.1184	1.00215	0.00310354	0.9873	0.999241	up	102.774	102.904	71.272	106.802	88.4646	81.0883	70186	2310056P07Rik|HGTD-P	MGI:MGI:1917436|Ensembl:ENSMUSG00000003955	16	16|16 B3	family with sequence similarity 162, member A		GO:0016020(membrane)//GO:0016021(integral component of membrane)//GO:0005739(mitochondrion)//GO:0005737(cytoplasm)//GO:0070062(extracellular exosome)	GO:0003674(molecular_function)	GO:0051402(neuron apoptotic process)//GO:0043065(positive regulation of apoptotic process)//GO:0071456(cellular response to hypoxia)//GO:0006919(activation of cysteine-type endopeptidase activity involved in apoptotic process)//GO:0090200(positive regulation of release of cytochrome c from mitochondria)//GO:0006915(apoptotic process)
Grm3	ENSMUSG00000003974	protein_coding	-	chr5:9485235-9725352	0	0	1	0	1	1	up	0	0	0	0	0	0	108069	0710001G23Rik|Gprc1c|mGlu3|mGluR3	MGI:MGI:1351340|Ensembl:ENSMUSG00000003974|Vega:OTTMUSG00000054376	5	5|5 A1	glutamate receptor, metabotropic 3	mmu04072(Phospholipase D signaling pathway)//mmu04080(Neuroactive ligand-receptor interaction)//mmu04724(Glutamatergic synapse)//mmu05030(Cocaine addiction)	GO:0005886(plasma membrane)//GO:0005887(integral component of plasma membrane)//GO:0043005(neuron projection)//GO:0016020(membrane)//GO:0030424(axon)//GO:0016021(integral component of membrane)//GO:0045211(postsynaptic membrane)//GO:0014069(postsynaptic density)//GO:0097449(astrocyte projection)//GO:0048786(presynaptic active zone)//GO:0042734(presynaptic membrane)//GO:0043197(dendritic spine)	GO:0004871(signal transducer activity)//GO:0001641(group II metabotropic glutamate receptor activity)//GO:0004930(G-protein coupled receptor activity)//GO:0005246(calcium channel regulator activity)	GO:0051930(regulation of sensory perception of pain)//GO:0007186(G-protein coupled receptor signaling pathway)//GO:0019233(sensory perception of pain)//GO:0051966(regulation of synaptic transmission, glutamatergic)//GO:0050804(modulation of synaptic transmission)//GO:0035249(synaptic transmission, glutamatergic)//GO:0007165(signal transduction)
Ssbp2	ENSMUSG00000003992	protein_coding	+	chr13:91460282-91786148	6.43013	6.14257	1.04681	0.0660056	0.78645	0.999241	up	6.95935	6.76266	5.56837	6.61161	6.0617	5.75439	66970	1500004K09Rik|2310079I02Rik|9330163K02Rik|A830008M03Rik|AU067692|AW558684|Hspc116|SSDP2	MGI:MGI:1914220|Ensembl:ENSMUSG00000003992|Vega:OTTMUSG00000024516	13	13|13 C3	single-stranded DNA binding protein 2		GO:0005634(nucleus)//GO:0005737(cytoplasm)	GO:0003697(single-stranded DNA binding)//GO:0005515(protein binding)//GO:0003677(DNA binding)	GO:0006351(transcription, DNA-templated)//GO:0006355(regulation of transcription, DNA-templated)//GO:0008150(biological_process)
Fancl	ENSMUSG00000004018	protein_coding	+	chr11:26386134-26593999	1.66749	1.51656	1.09952	0.136872	0.82845	0.999241	up	2.0327	1.84488	1.12487	1.69675	0.692913	2.16001	67030	2010322C19Rik|AW554273|B230118H11Rik|Phf9|Pog|gcd	MGI:MGI:1914280|Ensembl:ENSMUSG00000004018|Vega:OTTMUSG00000008088	11	11|11 A2-A3	Fanconi anemia, complementation group L	mmu03460(Fanconi anemia pathway)//mmu04120(Ubiquitin mediated proteolysis)	GO:0005634(nucleus)//GO:0005737(cytoplasm)//GO:0005635(nuclear envelope)//GO:0043240(Fanconi anaemia nuclear complex)	GO:0070740(tubulin-glutamic acid ligase activity)//GO:0070735(protein-glycine ligase activity)//GO:0070739(protein-glutamic acid ligase activity)//GO:0031625(ubiquitin protein ligase binding)//GO:0008766(UDP-N-acetylmuramoylalanyl-D-glutamyl-2,6-diaminopimelate-D-alanyl-D-alanine ligase activity)//GO:0070737(protein-glycine ligase activity, elongating)//GO:0004842(ubiquitin-protein transferase ac…	GO:0098792(xenophagy)//GO:0006974(cellular response to DNA damage stimulus)//GO:0007276(gamete generation)//GO:0042127(regulation of cell proliferation)//GO:0002230(positive regulation of defense response to virus by host)//GO:0006281(DNA repair)//GO:0006513(protein monoubiquitination)
Brinp2	ENSMUSG00000004031	protein_coding	-	chr1:158245270-158356260	0.065173	0.0311395	2.09294	1.06553	1	1	up	0	0.0460603	0.149459	0.0196989	0.0737197	0	240843	6430517E21Rik|BB361039|Fam5b|mKIAA1747	MGI:MGI:2443333|Ensembl:ENSMUSG00000004031|Vega:OTTMUSG00000049880	1	1|1 H1	bone morphogenic protein/retinoic acid inducible neural-specific 2		GO:0005783(endoplasmic reticulum)//GO:0030425(dendrite)//GO:0005576(extracellular region)//GO:0043025(neuronal cell body)	GO:0003674(molecular_function)	GO:0045666(positive regulation of neuron differentiation)//GO:0071300(cellular response to retinoic acid)//GO:0007050(cell cycle arrest)//GO:0007049(cell cycle)//GO:0045930(negative regulation of mitotic cell cycle)//GO:0045786(negative regulation of cell cycle)
Gstm3	ENSMUSG00000004038	protein_coding	-	chr3:107938846-107969283	0.201942	0.112046	1.80231	0.849845	1	1	up	0.0629829	0.337603	0.20524	0	0.269936	0.0662031	14864	Fsc2|mGSTM5	MGI:MGI:106026|Ensembl:ENSMUSG00000004038|Vega:OTTMUSG00000007193	3	3|3 F3	glutathione S-transferase, mu 3	mmu00480(Glutathione metabolism)//mmu00980(Metabolism of xenobiotics by cytochrome P450)//mmu00982(Drug metabolism - cytochrome P450)//mmu05204(Chemical carcinogenesis)	GO:0005737(cytoplasm)	GO:0042803(protein homodimerization activity)//GO:0016740(transferase activity)//GO:0004364(glutathione transferase activity)	GO:0071407(cellular response to organic cyclic compound)//GO:0008152(metabolic process)//GO:0035690(cellular response to drug)
Stat3	ENSMUSG00000004040	protein_coding	-	chr11:100859350-100939540	10.2477	8.8155	1.16247	0.217192	0.52555	0.999241	up	11.4829	9.4774	9.78287	7.38078	10.566	8.4997	20848	1110034C02Rik|AW109958|Aprf	MGI:MGI:103038|Ensembl:ENSMUSG00000004040|Vega:OTTMUSG00000002128	11	11 D|11 63.82 cM	signal transducer and activator of transcription 3	mmu04062(Chemokine signaling pathway)//mmu04066(HIF-1 signaling pathway)//mmu04068(FoxO signaling pathway)//mmu04550(Signaling pathways regulating pluripotency of stem cells)//mmu04630(Jak-STAT signaling pathway)//mmu04917(Prolactin signaling pathway)//mmu04920(Adipocytokine signaling pathway)//mmu04931(Insulin resistance)//mmu04933(AGE-RAGE signaling pathway in diabetic complications)//mmu05145(…	GO:0005743(mitochondrial inner membrane)//GO:0000790(nuclear chromatin)//GO:0005886(plasma membrane)//GO:0005739(mitochondrion)//GO:0090575(RNA polymerase II transcription factor complex)//GO:0005654(nucleoplasm)//GO:0005634(nucleus)//GO:0005737(cytoplasm)	GO:0046983(protein dimerization activity)//GO:0019903(protein phosphatase binding)//GO:0004879(RNA polymerase II transcription factor activity, ligand-activated sequence-specific DNA binding)//GO:0031490(chromatin DNA binding)//GO:0043565(sequence-specific DNA binding)//GO:0003700(transcription factor activity, sequence-specific DNA binding)//GO:0019901(protein kinase binding)//GO:0000981(RNA pol…	GO:0034097(response to cytokine)//GO:0046902(regulation of mitochondrial membrane permeability)//GO:0016310(phosphorylation)//GO:0010628(positive regulation of gene expression)//GO:0060548(negative regulation of cell death)//GO:1901215(negative regulation of neuron death)//GO:1902895(positive regulation of pri-miRNA transcription from RNA polymerase II promoter)//GO:0060396(growth hormone recepto…
Stat5a	ENSMUSG00000004043	protein_coding	+	chr11:100859350-100939540	1.12802	0.909615	1.2401	0.310461	0.5892	0.999241	up	1.66626	0.950072	0.767724	0.873813	0.857177	0.997855	20850	AA959963|STAT5	MGI:MGI:103036|Ensembl:ENSMUSG00000004043|Vega:OTTMUSG00000002125	11	11 D|11 63.77 cM	signal transducer and activator of transcription 5A	mmu04012(ErbB signaling pathway)//mmu04630(Jak-STAT signaling pathway)//mmu04917(Prolactin signaling pathway)//mmu04933(AGE-RAGE signaling pathway in diabetic complications)//mmu05161(Hepatitis B)//mmu05162(Measles)//mmu05166(HTLV-I infection)//mmu05200(Pathways in cancer)//mmu05203(Viral carcinogenesis)//mmu05220(Chronic myeloid leukemia)//mmu05221(Acute myeloid leukemia)	GO:0005654(nucleoplasm)//GO:0005634(nucleus)//GO:0005737(cytoplasm)	GO:0019903(protein phosphatase binding)//GO:0003700(transcription factor activity, sequence-specific DNA binding)//GO:0004871(signal transducer activity)//GO:0000979(RNA polymerase II core promoter sequence-specific DNA binding)//GO:0043565(sequence-specific DNA binding)//GO:0005515(protein binding)//GO:0003677(DNA binding)//GO:0003690(double-stranded DNA binding)	GO:0043536(positive regulation of blood vessel endothelial cell migration)//GO:0006107(oxaloacetate metabolic process)//GO:0070668(positive regulation of mast cell proliferation)//GO:0042104(positive regulation of activated T cell proliferation)//GO:0046449(creatinine metabolic process)//GO:0019915(lipid storage)//GO:0045621(positive regulation of lymphocyte differentiation)//GO:0045579(positive …
Map3k11	ENSMUSG00000004054	protein_coding	+	chr19:5590099-6300096	0.575863	0.548802	1.04931	0.0694407	1	1	up	3.02018e-61	0.879517	0.848073	5.23007e-61	0.726637	0.919769	26403	2610017K16Rik|Mlk3|PTK1|SPRK	MGI:MGI:1346880|Ensembl:ENSMUSG00000004054	19	19 A|19 4.34 cM	mitogen-activated protein kinase kinase kinase 11	mmu04010(MAPK signaling pathway)//mmu04932(Non-alcoholic fatty liver disease (NAFLD))	GO:0005813(centrosome)//GO:0016020(membrane)//GO:0005856(cytoskeleton)//GO:0005737(cytoplasm)//GO:0005874(microtubule)	GO:0004674(protein serine/threonine kinase activity)//GO:0042803(protein homodimerization activity)//GO:0004672(protein kinase activity)//GO:0031434(mitogen-activated protein kinase kinase binding)//GO:0004709(MAP kinase kinase kinase activity)//GO:0042802(identical protein binding)//GO:0004706(JUN kinase kinase kinase activity)//GO:0031435(mitogen-activated protein kinase kinase kinase binding)/…	GO:0046777(protein autophosphorylation)//GO:0008219(cell death)//GO:0007256(activation of JNKK activity)//GO:0043507(positive regulation of JUN kinase activity)//GO:0007257(activation of JUN kinase activity)//GO:0016310(phosphorylation)//GO:0000187(activation of MAPK activity)//GO:0006468(protein phosphorylation)//GO:0008283(cell proliferation)//GO:0007017(microtubule-based process)//GO:0046330(p…
Akt2	ENSMUSG00000004056	protein_coding	+	chr7:27591551-27640826	64.8617	51.0109	1.27153	0.346562	0.1773	0.999241	up	65.1794	71.4194	57.9865	43.5598	46.8285	62.6445	11652	2410016A19Rik|AW554154|PKB|PKBbeta	MGI:MGI:104874|Ensembl:ENSMUSG00000004056|Vega:OTTMUSG00000016504	7	7 15.94 cM|7 B1	thymoma viral proto-oncogene 2	mmu04010(MAPK signaling pathway)//mmu04012(ErbB signaling pathway)//mmu04014(Ras signaling pathway)//mmu04015(Rap1 signaling pathway)//mmu04022(cGMP-PKG signaling pathway)//mmu04024(cAMP signaling pathway)//mmu04062(Chemokine signaling pathway)//mmu04066(HIF-1 signaling pathway)//mmu04068(FoxO signaling pathway)//mmu04071(Sphingolipid signaling pathway)//mmu04072(Phospholipase D signaling pathway…	GO:0005768(endosome)//GO:0005886(plasma membrane)//GO:0005938(cell cortex)//GO:0016020(membrane)//GO:0005829(cytosol)//GO:0043231(intracellular membrane-bounded organelle)//GO:0031982(vesicle)//GO:0032593(insulin-responsive compartment)//GO:0005634(nucleus)//GO:0032587(ruffle membrane)//GO:0005737(cytoplasm)	GO:0004674(protein serine/threonine kinase activity)//GO:0005080(protein kinase C binding)//GO:0004672(protein kinase activity)//GO:0000166(nucleotide binding)//GO:0016301(kinase activity)//GO:0005515(protein binding)//GO:0005524(ATP binding)//GO:0016740(transferase activity)	GO:0045725(positive regulation of glycogen biosynthetic process)//GO:0090314(positive regulation of protein targeting to membrane)//GO:0090630(activation of GTPase activity)//GO:0016310(phosphorylation)//GO:0010628(positive regulation of gene expression)//GO:0032000(positive regulation of fatty acid beta-oxidation)//GO:0005975(carbohydrate metabolic process)//GO:0043491(protein kinase B signaling…
Dnaja3	ENSMUSG00000004069	protein_coding	+	chr16:4626132-4707695	32.2363	31.8805	1.01116	0.0160104	0.93365	0.999241	up	31.541	32.513	32.6547	30.4036	33.3203	31.9175	83945	1200003J13Rik|1810053A11Rik|C81173|Tid-1|Tid1l	MGI:MGI:1933786|Ensembl:ENSMUSG00000004069|Vega:OTTMUSG00000024742	16	16 A1|16 2.46 cM	DnaJ heat shock protein family (Hsp40) member A3	mmu05203(Viral carcinogenesis)	GO:0005886(plasma membrane)//GO:0016020(membrane)//GO:0005759(mitochondrial matrix)//GO:0005884(actin filament)//GO:0045202(synapse)//GO:0043231(intracellular membrane-bounded organelle)//GO:0005739(mitochondrion)//GO:0030054(cell junction)//GO:0031594(neuromuscular junction)//GO:0019897(extrinsic component of plasma membrane)//GO:0005634(nucleus)//GO:0045211(postsynaptic membrane)//GO:0005829(cy…	GO:0051082(unfolded protein binding)//GO:0005524(ATP binding)//GO:0030544(Hsp70 protein binding)//GO:0030695(GTPase regulator activity)//GO:0031072(heat shock protein binding)//GO:0046872(metal ion binding)//GO:0005515(protein binding)	GO:0009408(response to heat)//GO:0042102(positive regulation of T cell proliferation)//GO:0043069(negative regulation of programmed cell death)//GO:0006264(mitochondrial DNA replication)//GO:0033077(T cell differentiation in thymus)//GO:0007569(cell aging)//GO:0007264(small GTPase mediated signal transduction)//GO:0006924(activation-induced cell death of T cells)//GO:0007005(mitochondrion organiz…
Hmox2	ENSMUSG00000004070	protein_coding	+	chr16:4726360-4790292	25.5756	24.475	1.04497	0.0634623	0.84305	0.999241	up	30.3144	23.49	22.9225	28.6157	24.2967	20.5125	15369	HO-2|HO2	MGI:MGI:109373|Ensembl:ENSMUSG00000004070|Vega:OTTMUSG00000026637	16	16 2.46 cM|16 B1	heme oxygenase 2	mmu00860(Porphyrin and chlorophyll metabolism)//mmu04978(Mineral absorption)	GO:0005783(endoplasmic reticulum)//GO:0016020(membrane)//GO:0005886(plasma membrane)//GO:0043231(intracellular membrane-bounded organelle)	GO:0016491(oxidoreductase activity)//GO:0004392(heme oxygenase (decyclizing) activity)//GO:0046872(metal ion binding)	GO:0006788(heme oxidation)//GO:0001666(response to hypoxia)//GO:0055114(oxidation-reduction process)//GO:0006979(response to oxidative stress)
Zak	ENSMUSG00000004085	protein_coding	+	chr2:72274652-72585445	50.4104	38.1384	1.32178	0.402478	0.04305	0.920855	up	50.2264	50.0677	50.9372	29.0024	41.3439	44.069	65964	AV006891|B230120H23Rik|MLTK|MLTKalpha|MLTKbeta	MGI:MGI:2443258|Ensembl:ENSMUSG00000004085|Vega:OTTMUSG00000013165	2	2|2 C3	sterile alpha motif and leucine zipper containing kinase AZK	mmu04010(MAPK signaling pathway)//mmu04530(Tight junction)	GO:0005634(nucleus)//GO:0005737(cytoplasm)	GO:0004674(protein serine/threonine kinase activity)//GO:0004672(protein kinase activity)//GO:0004709(MAP kinase kinase kinase activity)//GO:0000287(magnesium ion binding)//GO:0000166(nucleotide binding)//GO:0016301(kinase activity)//GO:0044822(poly(A) RNA binding)//GO:0046872(metal ion binding)//GO:0005524(ATP binding)//GO:0016740(transferase activity)	GO:0007010(cytoskeleton organization)//GO:0007257(activation of JUN kinase activity)//GO:0016310(phosphorylation)//GO:0007050(cell cycle arrest)//GO:0006468(protein phosphorylation)//GO:0007049(cell cycle)//GO:0000186(activation of MAPKK activity)//GO:0009314(response to radiation)//GO:0043065(positive regulation of apoptotic process)//GO:0000077(DNA damage checkpoint)//GO:0000075(cell cycle chec…
Cwc15	ENSMUSG00000004096	protein_coding	+	chr9:14500616-14510577	87.3627	83.4471	1.04692	0.0661552	0.72165	0.999241	up	87.3866	94.4447	80.2567	77.5481	83.6562	89.137	66070	0610040D20Rik|2900052N06Rik|Ed1|c11orf5|mED1	MGI:MGI:1913320|Ensembl:ENSMUSG00000004096|Vega:OTTMUSG00000034185	9	9|9 A3	CWC15 spliceosome-associated protein	mmu03040(Spliceosome)	GO:0071013(catalytic step 2 spliceosome)//GO:0005634(nucleus)//GO:0005681(spliceosomal complex)	GO:0003674(molecular_function)	GO:0006397(mRNA processing)//GO:0000398(mRNA splicing, via spliceosome)//GO:0008380(RNA splicing)//GO:0008150(biological_process)
Angptl2	ENSMUSG00000004105	protein_coding	+	chr2:33133418-33371486	4.56994	4.50972	1.01335	0.0191376	0.932	0.999241	up	4.97114	4.89492	3.84376	4.68523	4.75751	4.08643	26360	AI593246|AW260363|Arp2	MGI:MGI:1347002|Ensembl:ENSMUSG00000004105|Vega:OTTMUSG00000012579	2	2|2 B	angiopoietin-like 2		GO:0070062(extracellular exosome)//GO:0005576(extracellular region)
Cacna1b	ENSMUSG00000004113	protein_coding	-	chr2:24603886-24763152	0.00519897	0	inf	inf	1	1	up	0	0	0.0155969	0	0	0	12287	AW050276|AW060892|AW822256|Cav2.2|Cchn1a|alpha(1B)	MGI:MGI:88296|Ensembl:ENSMUSG00000004113|Vega:OTTMUSG00000012011	2	2 16.58 cM|2 A2	calcium channel, voltage-dependent, N type, alpha 1B subunit	mmu04010(MAPK signaling pathway)//mmu04020(Calcium signaling pathway)//mmu04721(Synaptic vesicle cycle)//mmu04723(Retrograde endocannabinoid signaling)//mmu04725(Cholinergic synapse)//mmu04726(Serotonergic synapse)//mmu04727(GABAergic synapse)//mmu04728(Dopaminergic synapse)//mmu04930(Type II diabetes mellitus)//mmu05032(Morphine addiction)//mmu05033(Nicotine addiction)	GO:0043679(axon terminus)//GO:0005886(plasma membrane)//GO:0043005(neuron projection)//GO:0016020(membrane)//GO:0030425(dendrite)//GO:0043234(protein complex)//GO:0016021(integral component of membrane)//GO:0043198(dendritic shaft)//GO:0005891(voltage-gated calcium channel complex)//GO:0043025(neuronal cell body)	GO:0005245(voltage-gated calcium channel activity)//GO:0051721(protein phosphatase 2A binding)//GO:0005524(ATP binding)//GO:0005244(voltage-gated ion channel activity)//GO:0005216(ion channel activity)//GO:0000166(nucleotide binding)//GO:0008331(high voltage-gated calcium channel activity)//GO:0008022(protein C-terminus binding)//GO:0005262(calcium channel activity)//GO:0046872(metal ion binding)…	GO:0001956(positive regulation of neurotransmitter secretion)//GO:0070509(calcium ion import)//GO:0034765(regulation of ion transmembrane transport)//GO:0019233(sensory perception of pain)//GO:0070588(calcium ion transmembrane transport)//GO:0033574(response to testosterone)//GO:0055085(transmembrane transport)//GO:0008217(regulation of blood pressure)//GO:0008016(regulation of heart contraction)…
Psap	ENSMUSG00000004207	protein_coding	+	chr10:60277626-60302597	136.128	130.139	1.04601	0.064902	0.75605	0.999241	up	135.082	134.4	138.901	104.345	147.467	138.606	19156	AI037048|SGP-1	MGI:MGI:97783|Ensembl:ENSMUSG00000004207|Vega:OTTMUSG00000016474	10	10 B4|10 30.02 cM	prosaposin	mmu04142(Lysosome)	GO:0005764(lysosome)//GO:0005739(mitochondrion)//GO:0005576(extracellular region)//GO:0005615(extracellular space)//GO:0070062(extracellular exosome)	GO:0001664(G-protein coupled receptor binding)//GO:0008047(enzyme activator activity)	GO:0019216(regulation of lipid metabolic process)//GO:0071310(cellular response to organic substance)//GO:0060736(prostate gland growth)//GO:1903206(negative regulation of hydrogen peroxide-induced cell death)//GO:0006687(glycosphingolipid metabolic process)//GO:0048589(developmental growth)//GO:0043408(regulation of MAPK cascade)//GO:0043410(positive regulation of MAPK cascade)//GO:0060742(epith…
Ikbkg	ENSMUSG00000004221	protein_coding	+	chrX:74393289-74453854	3.93853	3.33725	1.18017	0.238996	0.29705	0.999241	up	4.25474	3.54948	4.01135	3.79498	3.26676	2.95001	16151	1110037D23Rik|AI848108|AI851264|AW124339|IKK[g]|NEMO	MGI:MGI:1338074|Ensembl:ENSMUSG00000004221|Vega:OTTMUSG00000017732	X	X|X A7.3	inhibitor of kappaB kinase gamma	mmu04010(MAPK signaling pathway)//mmu04014(Ras signaling pathway)//mmu04062(Chemokine signaling pathway)//mmu04064(NF-kappa B signaling pathway)//mmu04151(PI3K-Akt signaling pathway)//mmu04210(Apoptosis)//mmu04380(Osteoclast differentiation)//mmu04620(Toll-like receptor signaling pathway)//mmu04621(NOD-like receptor signaling pathway)//mmu04622(RIG-I-like receptor signaling pathway)//mmu04623(Cyt…	GO:0000151(ubiquitin ligase complex)//GO:0072686(mitotic spindle)//GO:0005829(cytosol)//GO:0008385(IkappaB kinase complex)//GO:0005622(intracellular)//GO:0005634(nucleus)//GO:0005737(cytoplasm)//GO:0000922(spindle pole)	GO:1990450(linear polyubiquitin binding)//GO:0042975(peroxisome proliferator activated receptor binding)//GO:0019904(protein domain specific binding)//GO:0042803(protein homodimerization activity)//GO:0046982(protein heterodimerization activity)//GO:0070530(K63-linked polyubiquitin binding)//GO:0046872(metal ion binding)//GO:0005515(protein binding)//GO:0031625(ubiquitin protein ligase binding)	GO:1902236(negative regulation of endoplasmic reticulum stress-induced intrinsic apoptotic signaling pathway)//GO:0043123(positive regulation of I-kappaB kinase/NF-kappaB signaling)//GO:0006974(cellular response to DNA damage stimulus)//GO:0010628(positive regulation of gene expression)//GO:0006351(transcription, DNA-templated)//GO:0006355(regulation of transcription, DNA-templated)//GO:0045944(p…
Atn1	ENSMUSG00000004263	protein_coding	-	chr6:124739182-124756524	5.76583	5.59321	1.03086	0.0438535	0.9316	0.999241	up	6.41342	4.227	6.65707	3.11129	7.30695	6.36138	13498	Atr1|Drpla|atrophin-1	MGI:MGI:104725|Ensembl:ENSMUSG00000004263|Ensembl:ENSMUSG00000107478|Vega:OTTMUSG00000023122|Vega:OTTMUSG00000056673	6	6 F2|6 59.17 cM	atrophin 1		GO:0048471(perinuclear region of cytoplasm)//GO:0016363(nuclear matrix)//GO:0005737(cytoplasm)//GO:0005654(nucleoplasm)//GO:0005634(nucleus)//GO:0031252(cell leading edge)	GO:0019904(protein domain specific binding)//GO:0001105(RNA polymerase II transcription coactivator activity)//GO:0008432(JUN kinase binding)//GO:0050827(toxin receptor binding)//GO:0005515(protein binding)//GO:0003714(transcription corepressor activity)	GO:0009404(toxin metabolic process)//GO:0051402(neuron apoptotic process)//GO:0000122(negative regulation of transcription from RNA polymerase II promoter)
Ptpn6	ENSMUSG00000004266	protein_coding	-	chr6:124430758-124738714	0.454337	0.451412	1.00648	0.00931764	1	1	up	0.0646847	0.868297	0.430028	0.256027	0.858023	0.240185	15170	70Z-SHP|Hcph|PTPTY-42|Ptp1C|SH-PTP1|SHP-1|hcp|me	MGI:MGI:96055|Ensembl:ENSMUSG00000004266|Vega:OTTMUSG00000038210	6	6 F2|6 59.17 cM	protein tyrosine phosphatase, non-receptor type 6	mmu04520(Adherens junction)//mmu04630(Jak-STAT signaling pathway)//mmu04650(Natural killer cell mediated cytotoxicity)//mmu04660(T cell receptor signaling pathway)//mmu04662(B cell receptor signaling pathway)//mmu05140(Leishmaniasis)//mmu05205(Proteoglycans in cancer)	GO:0070062(extracellular exosome)//GO:0042105(alpha-beta T cell receptor complex)//GO:0005737(cytoplasm)//GO:0005730(nucleolus)//GO:0005634(nucleus)//GO:0005911(cell-cell junction)	GO:0001784(phosphotyrosine binding)//GO:0019901(protein kinase binding)//GO:0005001(transmembrane receptor protein tyrosine phosphatase activity)//GO:0004721(phosphoprotein phosphatase activity)//GO:0017124(SH3 domain binding)//GO:0016791(phosphatase activity)//GO:0042169(SH2 domain binding)//GO:0046703(natural killer cell lectin-like receptor binding)//GO:0050839(cell adhesion molecule binding)/…	GO:0002924(negative regulation of humoral immune response mediated by circulating immunoglobulin)//GO:0043407(negative regulation of MAP kinase activity)//GO:0070372(regulation of ERK1 and ERK2 cascade)//GO:0043409(negative regulation of MAPK cascade)//GO:0033630(positive regulation of cell adhesion mediated by integrin)//GO:0070527(platelet aggregation)//GO:0002244(hematopoietic progenitor cell …
Eno2	ENSMUSG00000004267	protein_coding	-	chr6:124760052-124769673	0.206404	0.045364	4.54995	2.18585	1	1	up	0.0299634	0.0269282	0.562321	0.103776	0.0323162	0	13807	AI837106|D6Ertd375e|Eno-2|NSE	MGI:MGI:95394|Ensembl:ENSMUSG00000004267|Vega:OTTMUSG00000022240	6	6 F2|6 59.17 cM	enolase 2, gamma neuronal	mmu00010(Glycolysis / Gluconeogenesis)//mmu01100(Metabolic pathways)//mmu01200(Carbon metabolism)//mmu01230(Biosynthesis of amino acids)//mmu03018(RNA degradation)//mmu04066(HIF-1 signaling pathway)	GO:0097060(synaptic membrane)//GO:0005886(plasma membrane)//GO:0043209(myelin sheath)//GO:0001917(photoreceptor inner segment)//GO:0000015(phosphopyruvate hydratase complex)//GO:0043005(neuron projection)//GO:0016020(membrane)//GO:0043204(perikaryon)//GO:0070062(extracellular exosome)//GO:0005622(intracellular)//GO:0005615(extracellular space)//GO:0005737(cytoplasm)//GO:0043025(neuronal cell body)	GO:0042803(protein homodimerization activity)//GO:0046982(protein heterodimerization activity)//GO:0000287(magnesium ion binding)//GO:0016829(lyase activity)//GO:0004634(phosphopyruvate hydratase activity)//GO:0046872(metal ion binding)	GO:0006096(glycolytic process)
Lpcat3	ENSMUSG00000004270	protein_coding	+	chr6:124430758-124738714	6.61734	5.6698	1.16712	0.222954	0.67265	0.999241	up	7.70035	6.44966	5.70201	5.71372	5.95437	5.3413	14792	C3f|Grcc3f|Lpcat|Lpeat|Lplat5|Lpsat|Mboat5|Moact5|Oact5|PTG	MGI:MGI:1315211|Ensembl:ENSMUSG00000004270|Vega:OTTMUSG00000023580	6	6 F2|6 59.17 cM	lysophosphatidylcholine acyltransferase 3	mmu00564(Glycerophospholipid metabolism)	GO:0005783(endoplasmic reticulum)//GO:0016020(membrane)//GO:0016021(integral component of membrane)	GO:0019707(protein-cysteine S-acyltransferase activity)//GO:0090595(acetyl-CoA:L-lysine N6-acetyltransferase)//GO:0034919(butyryl-CoA 2-C-propionyltransferase activity)//GO:0008080(N-acetyltransferase activity)//GO:0016751(S-succinyltransferase activity)//GO:0019107(myristoyltransferase activity)//GO:0052858(peptidyl-lysine N-acetyltransferase activity, acting on acetyl phosphate as donor)//GO:00…	GO:0006629(lipid metabolic process)//GO:0008654(phospholipid biosynthetic process)//GO:0097006(regulation of plasma lipoprotein particle levels)
Il12b	ENSMUSG00000004296	protein_coding	+	chr11:44400062-44414033	0	0	1	0	1	1	up	0	0	0	0	0	0	16160	Il-12b|Il-12p40|Il12p40|p40	MGI:MGI:96540|Ensembl:ENSMUSG00000004296|Vega:OTTMUSG00000005468	11	11 25.94 cM|11 A5-B2	interleukin 12b	mmu04060(Cytokine-cytokine receptor interaction)//mmu04620(Toll-like receptor signaling pathway)//mmu04622(RIG-I-like receptor signaling pathway)//mmu04630(Jak-STAT signaling pathway)//mmu04940(Type I diabetes mellitus)//mmu05133(Pertussis)//mmu05134(Legionellosis)//mmu05140(Leishmaniasis)//mmu05142(Chagas disease (American trypanosomiasis))//mmu05143(African trypanosomiasis)//mmu05145(Toxoplasmo…	GO:0043514(interleukin-12 complex)//GO:0005576(extracellular region)//GO:0016020(membrane)//GO:0070743(interleukin-23 complex)//GO:0005615(extracellular space)//GO:0005737(cytoplasm)	GO:0008083(growth factor activity)//GO:0005125(cytokine activity)//GO:0042803(protein homodimerization activity)//GO:0046982(protein heterodimerization activity)//GO:0042802(identical protein binding)//GO:0042164(interleukin-12 alpha subunit binding)//GO:0005143(interleukin-12 receptor binding)//GO:0004896(cytokine receptor activity)//GO:0005126(cytokine receptor binding)//GO:0005515(protein bind…	GO:0042523(positive regulation of tyrosine phosphorylation of Stat5 protein)//GO:0042104(positive regulation of activated T cell proliferation)//GO:0050829(defense response to Gram-negative bacterium)//GO:0042520(positive regulation of tyrosine phosphorylation of Stat4 protein)//GO:0016477(cell migration)//GO:0030101(natural killer cell activation)//GO:0007166(cell surface receptor signaling path…
Clcn3	ENSMUSG00000004319	protein_coding	-	chr8:60910388-60983300	12.5356	10.2308	1.22528	0.293114	0.15955	0.999241	up	13.22	13.1031	11.2837	9.71985	11.533	9.43958	12725	Clc3	MGI:MGI:103555|Ensembl:ENSMUSG00000004319|Vega:OTTMUSG00000022342	8	8 B3.1|8 30.9 cM	chloride channel, voltage-sensitive 3		GO:0043679(axon terminus)//GO:0005768(endosome)//GO:0005886(plasma membrane)//GO:0012506(vesicle membrane)//GO:0045335(phagocytic vesicle)//GO:0009897(external side of plasma membrane)//GO:0016020(membrane)//GO:0005794(Golgi apparatus)//GO:0005770(late endosome)//GO:0045202(synapse)//GO:0042581(specific granule)//GO:0008021(synaptic vesicle)//GO:0016021(integral component of membrane)//GO:0031410…	GO:0005247(voltage-gated chloride channel activity)//GO:0005524(ATP binding)//GO:0030165(PDZ domain binding)//GO:0005244(voltage-gated ion channel activity)//GO:0046982(protein heterodimerization activity)//GO:0005216(ion channel activity)//GO:0072320(volume-sensitive chloride channel activity)//GO:0000166(nucleotide binding)//GO:0015297(antiporter activity)//GO:0005254(chloride channel activity)…	GO:0045794(negative regulation of cell volume)//GO:0097401(synaptic vesicle lumen acidification)//GO:0006821(chloride transport)//GO:0045494(photoreceptor cell maintenance)//GO:0048388(endosomal lumen acidification)//GO:1902476(chloride transmembrane transport)//GO:1903428(positive regulation of reactive oxygen species biosynthetic process)//GO:0051932(synaptic transmission, GABAergic)//GO:007005…
Gpx6	ENSMUSG00000004341	protein_coding	+	chr13:21312216-21319624	0.0202048	0	inf	inf	1	1	up	0.0606144	0	0	0	0	0	75512	1700020G18Rik|Ry2d1|olfactory	MGI:MGI:1922762|Ensembl:ENSMUSG00000004341|Vega:OTTMUSG00000000419	13	13|13 A3.1	glutathione peroxidase 6	mmu00480(Glutathione metabolism)//mmu00590(Arachidonic acid metabolism)//mmu04918(Thyroid hormone synthesis)	GO:0005576(extracellular region)	GO:0016491(oxidoreductase activity)//GO:0004602(glutathione peroxidase activity)//GO:0004601(peroxidase activity)	GO:0055114(oxidation-reduction process)//GO:0006979(response to oxidative stress)
Gpx5	ENSMUSG00000004344	protein_coding	-	chr13:21286428-21292731	0	0	1	0	1	1	up	0	0	0	0	0	0	14780	AV379049|Arep	MGI:MGI:104886|Ensembl:ENSMUSG00000004344|Vega:OTTMUSG00000000743	13	13 7.73 cM|13 A2-A4	glutathione peroxidase 5	mmu00480(Glutathione metabolism)//mmu00590(Arachidonic acid metabolism)//mmu04918(Thyroid hormone synthesis)	GO:0097524(sperm plasma membrane)//GO:0005576(extracellular region)//GO:0005615(extracellular space)	GO:0016491(oxidoreductase activity)//GO:0004602(glutathione peroxidase activity)//GO:0004601(peroxidase activity)	GO:0055114(oxidation-reduction process)//GO:0034599(cellular response to oxidative stress)//GO:0006979(response to oxidative stress)
Pde1c	ENSMUSG00000004347	protein_coding	-	chr6:56069803-56369634	0.150608	0.149483	1.00753	0.0108165	1	1	up	0.229146	0.0592142	0.163464	0.25809	0.13741	0.0529491	18575	-	MGI:MGI:108413|Ensembl:ENSMUSG00000004347|Vega:OTTMUSG00000023509	6	6 B3|6 27.65 cM	phosphodiesterase 1C	mmu00230(Purine metabolism)//mmu04020(Calcium signaling pathway)//mmu04740(Olfactory transduction)//mmu04742(Taste transduction)//mmu04924(Renin secretion)//mmu05032(Morphine addiction)	GO:0005929(cilium)//GO:0043025(neuronal cell body)	GO:0052712(inositol phosphosphingolipid phospholipase activity)//GO:0004115(3',5'-cyclic-AMP phosphodiesterase activity)//GO:0004117(calmodulin-dependent cyclic-nucleotide phosphodiesterase activity)//GO:0052714(mannosyl-inositol phosphorylceramide phospholipase activity)//GO:0048101(calcium- and calmodulin-regulated 3',5'-cyclic-GMP phosphodiesterase activity)//GO:0005516(calmodulin binding)//GO…	GO:0046069(cGMP catabolic process)//GO:0006198(cAMP catabolic process)//GO:0051592(response to calcium ion)//GO:0007608(sensory perception of smell)//GO:0046676(negative regulation of insulin secretion)//GO:0007165(signal transduction)
Cul3	ENSMUSG00000004364	protein_coding	-	chr1:80264922-80340480	220.7	187.28	1.17845	0.236891	0.4988	0.999241	up	251.161	218.321	192.618	158.327	173.477	230.035	26554	KIAA0617	MGI:MGI:1347360|Ensembl:ENSMUSG00000004364|Vega:OTTMUSG00000035349	1	1|1 C4	cullin 3	mmu04120(Ubiquitin mediated proteolysis)	GO:0005634(nucleus)//GO:0016020(membrane)//GO:0031461(cullin-RING ubiquitin ligase complex)//GO:0005794(Golgi apparatus)//GO:0070062(extracellular exosome)//GO:0031463(Cul3-RING ubiquitin ligase complex)//GO:0005827(polar microtubule)//GO:0005737(cytoplasm)	GO:0046982(protein heterodimerization activity)//GO:0031625(ubiquitin protein ligase binding)//GO:0042803(protein homodimerization activity)//GO:0004842(ubiquitin-protein transferase activity)//GO:0031208(POZ domain binding)//GO:0061630(ubiquitin protein ligase activity)//GO:0030332(cyclin binding)//GO:0005515(protein binding)	GO:0007080(mitotic metaphase plate congression)//GO:0030030(cell projection organization)//GO:0016477(cell migration)//GO:0016192(vesicle-mediated transport)//GO:0000122(negative regulation of transcription from RNA polymerase II promoter)//GO:0043161(proteasome-mediated ubiquitin-dependent protein catabolic process)//GO:0006513(protein monoubiquitination)//GO:0000902(cell morphogenesis)//GO:0007…
Sst	ENSMUSG00000004366	protein_coding	-	chr16:23889580-23890844	0	0	1	0	1	1	up	0	0	0	0	0	0	20604	SOM|SRIF|SS|Smst	MGI:MGI:98326|Ensembl:ENSMUSG00000004366	16	16 15.0 cM|16 cen-C3	somatostatin	mmu04971(Gastric acid secretion)	GO:0005576(extracellular region)//GO:0005615(extracellular space)//GO:0043025(neuronal cell body)	GO:0005179(hormone activity)	GO:0030334(regulation of cell migration)//GO:0007166(cell surface receptor signaling pathway)//GO:0007267(cell-cell signaling)
Il11	ENSMUSG00000004371	protein_coding	-	chr7:4773054-4782857	0	0	1	0	1	1	up	0	0	0	0	0	0	16156	IL-11	MGI:MGI:107613|Ensembl:ENSMUSG00000004371|Vega:OTTMUSG00000040054	7	7 A1|7 2.76 cM	interleukin 11	mmu04060(Cytokine-cytokine receptor interaction)//mmu04630(Jak-STAT signaling pathway)//mmu04640(Hematopoietic cell lineage)//mmu05323(Rheumatoid arthritis)	GO:0005576(extracellular region)//GO:0005615(extracellular space)//GO:0005737(cytoplasm)	GO:0008083(growth factor activity)//GO:0005142(interleukin-11 receptor binding)//GO:0005125(cytokine activity)	GO:0008284(positive regulation of cell proliferation)//GO:0046888(negative regulation of hormone secretion)//GO:0033138(positive regulation of peptidyl-serine phosphorylation)//GO:0043410(positive regulation of MAPK cascade)//GO:0050731(positive regulation of peptidyl-tyrosine phosphorylation)//GO:0045944(positive regulation of transcription from RNA polymerase II promoter)
Large	ENSMUSG00000004383	protein_coding	-	chr8:72814598-73353540	5.07097	4.46095	1.13675	0.184912	0.3775	0.999241	up	5.42809	5.61521	4.16962	5.3901	4.42089	3.57186	16795	BPFD#36|Gyltl1a|Mbp-1|Mbp1|enr|fg|froggy|myd	MGI:MGI:1342270|Ensembl:ENSMUSG00000004383|Vega:OTTMUSG00000030306	8	8 35.08 cM|8 C1	like-glycosyltransferase		GO:0016020(membrane)//GO:0016021(integral component of membrane)//GO:0005794(Golgi apparatus)//GO:0043231(intracellular membrane-bounded organelle)	GO:0042285(xylosyltransferase activity)//GO:0018717(9-phenanthrol glycosyltransferase activity)//GO:0046527(glucosyltransferase activity)//GO:0000033(alpha-1,3-mannosyltransferase activity)//GO:0018718(1,2-dihydroxy-phenanthrene glycosyltransferase activity)//GO:0046921(alpha-(1->6)-fucosyltransferase activity)//GO:0052757(chondroitin hydrolase activity)//GO:0018716(1-phenanthrol glycosyltransfer…	GO:0035269(protein O-linked mannosylation)//GO:0008152(metabolic process)//GO:0043403(skeletal muscle tissue regeneration)//GO:0060538(skeletal muscle organ development)//GO:0046716(muscle cell cellular homeostasis)//GO:0009101(glycoprotein biosynthetic process)
Col26a1	ENSMUSG00000004415	protein_coding	-	chr5:136741758-136883209	0.404425	0.21172	1.91019	0.933718	1	1	up	0	0.736434	0.476841	0.0902955	0.101253	0.44361	140709	9430032K24Rik|BC002218|Col26a|Emid2|Emu2	MGI:MGI:2155345|Ensembl:ENSMUSG00000004415|Vega:OTTMUSG00000022688	5	5|5 G1	collagen, type XXVI, alpha 1		GO:0005576(extracellular region)//GO:0005581(collagen trimer)//GO:0005794(Golgi apparatus)//GO:0005783(endoplasmic reticulum)//GO:0005578(proteinaceous extracellular matrix)//GO:0031012(extracellular matrix)	GO:0005515(protein binding)	GO:0010811(positive regulation of cell-substrate adhesion)
Ppp1cc	ENSMUSG00000004455	protein_coding	+	chr5:122158277-122175273	56.5948	27.0965	2.08863	1.06256	0.001	0.132753	up	97.1721	39.1058	33.5066	24.672	22.4018	34.2158	19047	PP-1G|PP1|dis2m1	MGI:MGI:104872|Ensembl:ENSMUSG00000004455|Vega:OTTMUSG00000016349	5	5|5 F-G1	protein phosphatase 1, catalytic subunit, gamma isoform	mmu03015(mRNA surveillance pathway)//mmu04022(cGMP-PKG signaling pathway)//mmu04024(cAMP signaling pathway)//mmu04114(Oocyte meiosis)//mmu04261(Adrenergic signaling in cardiomyocytes)//mmu04270(Vascular smooth muscle contraction)//mmu04390(Hippo signaling pathway)//mmu04510(Focal adhesion)//mmu04611(Platelet activation)//mmu04720(Long-term potentiation)//mmu04728(Dopaminergic synapse)//mmu04750(I…	GO:0005739(mitochondrion)//GO:0005741(mitochondrial outer membrane)//GO:0043197(dendritic spine)	GO:0019903(protein phosphatase binding)//GO:0019904(protein domain specific binding)//GO:0032403(protein complex binding)//GO:0047485(protein N-terminus binding)//GO:0008157(protein phosphatase 1 binding)//GO:0004722(protein serine/threonine phosphatase activity)//GO:0005515(protein binding)//GO:0008022(protein C-terminus binding)//GO:0005521(lamin binding)	GO:0046822(regulation of nucleocytoplasmic transport)//GO:0006470(protein dephosphorylation)//GO:0030182(neuron differentiation)
Dnajb11	ENSMUSG00000004460	protein_coding	+	chr16:22857844-22899451	20.5821	20.3363	1.01209	0.0173336	0.9443	0.999241	up	19.5255	21.9701	20.2507	19.9936	21.0255	19.9898	67838	1810031F23Rik|ABBP-2|AL024055|Dj9|ERdj3|ERj3p	MGI:MGI:1915088|Ensembl:ENSMUSG00000004460|Vega:OTTMUSG00000025893	16	16|16 B1	DnaJ heat shock protein family (Hsp40) member B11	mmu04141(Protein processing in endoplasmic reticulum)	GO:0005783(endoplasmic reticulum)//GO:0016020(membrane)//GO:0005634(nucleus)//GO:0034663(endoplasmic reticulum chaperone complex)//GO:0005737(cytoplasm)	GO:0005515(protein binding)//GO:0051082(unfolded protein binding)	GO:0016556(mRNA modification)//GO:0032781(positive regulation of ATPase activity)//GO:0006457(protein folding)
Tbccd1	ENSMUSG00000004462	protein_coding	-	chr16:22813214-22857569	1.77811	1.71777	1.03513	0.0498059	0.87895	0.999241	up	2.03604	1.6852	1.61309	1.265	1.56413	2.32419	70573	5730478M09Rik|AU015083|BB165076	MGI:MGI:1917823|Ensembl:ENSMUSG00000004462	16	16|16 B1	TBCC domain containing 1		GO:0005856(cytoskeleton)//GO:0005737(cytoplasm)//GO:0031616(spindle pole centrosome)	GO:0003674(molecular_function)//GO:0003779(actin binding)	GO:0008360(regulation of cell shape)//GO:0000902(cell morphogenesis)//GO:0051684(maintenance of Golgi location)//GO:0007010(cytoskeleton organization)//GO:0051661(maintenance of centrosome location)//GO:0030334(regulation of cell migration)
Zfp324	ENSMUSG00000004500	protein_coding	+	chr7:12965837-12974236	0.2211	0.201241	1.09868	0.135776	1	1	up	0.21224	0.218456	0.232604	0.205656	0.157441	0.240626	243834	A930002M05|D430030K24Rik|ZF5128	MGI:MGI:2444641|Ensembl:ENSMUSG00000004500|Vega:OTTMUSG00000022360	7	7|7 A1	zinc finger protein 324		GO:0005575(cellular_component)	GO:0003674(molecular_function)	GO:0008150(biological_process)
Coro1c	ENSMUSG00000004530	protein_coding	-	chr5:113842435-113908758	2.68222	2.58557	1.03738	0.0529476	0.89365	0.999241	up	4.00019	2.1062	1.94028	3.92177	2.04809	1.78683	23790	AL022675|AW455561|AW548837	MGI:MGI:1345964|Ensembl:ENSMUSG00000004530|Vega:OTTMUSG00000036099	5	5|5 F	coronin, actin binding protein 1C		GO:0005886(plasma membrane)//GO:0016328(lateral plasma membrane)//GO:0030027(lamellipodium)//GO:0016020(membrane)//GO:0015629(actin cytoskeleton)//GO:0016600(flotillin complex)//GO:0031982(vesicle)//GO:0042995(cell projection)//GO:0005856(cytoskeleton)//GO:0005737(cytoplasm)	GO:0048365(Rac GTPase binding)//GO:0003779(actin binding)//GO:0051015(actin filament binding)	GO:1900024(regulation of substrate adhesion-dependent cell spreading)//GO:2000394(positive regulation of lamellipodium morphogenesis)//GO:0090630(activation of GTPase activity)//GO:0010762(regulation of fibroblast migration)//GO:0010633(negative regulation of epithelial cell migration)//GO:0010632(regulation of epithelial cell migration)//GO:0045184(establishment of protein localization)//GO:0051…
Tax1bp1	ENSMUSG00000004535	protein_coding	+	chr6:52713345-52766780	37.8426	36.9223	1.02493	0.0355184	0.8449	0.999241	up	37.6694	39.1878	36.6705	35.9463	38.1638	36.6568	52440	1200003J11Rik|1700069J21Rik|AA930106|D6Ertd404e|D6Ertd772e|T6bp|TXBP151	MGI:MGI:1289308|Ensembl:ENSMUSG00000004535|Vega:OTTMUSG00000022785	6	6 B3|6 25.7 cM	Tax1 (human T cell leukemia virus type I) binding protein 1		GO:0070062(extracellular exosome)	GO:0019900(kinase binding)//GO:0043130(ubiquitin binding)//GO:0046872(metal ion binding)//GO:0005515(protein binding)	GO:0006915(apoptotic process)//GO:0032088(negative regulation of NF-kappaB transcription factor activity)//GO:0043066(negative regulation of apoptotic process)
Psg17	ENSMUSG00000004540	protein_coding	-	chr7:18813936-18821607	0.0249896	0.0131977	1.89348	0.921043	1	1	up	0	0	0.0749687	0.039593	0	0	26437	Cea-2|Cea2|mmCGM5	MGI:MGI:1347250|Ensembl:ENSMUSG00000004540|Vega:OTTMUSG00000017162	7	7 A3|7 9.33 cM	pregnancy specific glycoprotein 17			GO:0043395(heparan sulfate proteoglycan binding)//GO:0005515(protein binding)	GO:0006955(immune response)//GO:0007565(female pregnancy)
Psg19	ENSMUSG00000004542	protein_coding	-	chr7:18789566-18798520	0	0	1	0	1	1	up	0	0	0	0	0	0	26439	CGM7|Cea-4|Cea4	MGI:MGI:1347252|Ensembl:ENSMUSG00000004542|Vega:OTTMUSG00000043487	7	7 A3|7 9.31 cM	pregnancy specific glycoprotein 19		GO:0005575(cellular_component)	GO:0003674(molecular_function)	GO:0008150(biological_process)
Ctse	ENSMUSG00000004552	protein_coding	+	chr1:131638305-131675503	0	0	1	0	1	1	up	0	0	0	0	0	0	13034	A430072O03Rik|C920004C08Rik|CE|CatE	MGI:MGI:107361|Ensembl:ENSMUSG00000004552|Vega:OTTMUSG00000022661	1	1 57.14 cM|1 F	cathepsin E	mmu04142(Lysosome)	GO:0005768(endosome)//GO:0070062(extracellular exosome)	GO:0008233(peptidase activity)//GO:0042803(protein homodimerization activity)//GO:0016787(hydrolase activity)//GO:0004190(aspartic-type endopeptidase activity)	GO:0006508(proteolysis)//GO:0016540(protein autoprocessing)//GO:0030163(protein catabolic process)//GO:0019886(antigen processing and presentation of exogenous peptide antigen via MHC class II)
Pnpla6	ENSMUSG00000004565	protein_coding	+	chr8:3515383-3544266	0.641561	0.593233	1.08147	0.112988	1	1	up	0.542352	0.693475	0.688857	0.435739	0.492671	0.851289	50767	AI661849|MSws|Nte	MGI:MGI:1354723|Ensembl:ENSMUSG00000004565|Vega:OTTMUSG00000059166	8	8 A1.1|8 1.92 cM	patatin-like phospholipase domain containing 6	mmu00564(Glycerophospholipid metabolism)	GO:0005783(endoplasmic reticulum)//GO:0016020(membrane)//GO:0016021(integral component of membrane)	GO:0052689(carboxylic ester hydrolase activity)//GO:0004622(lysophospholipase activity)//GO:0016787(hydrolase activity)	GO:0008152(metabolic process)//GO:0009887(organ morphogenesis)//GO:0016042(lipid catabolic process)//GO:0046470(phosphatidylcholine metabolic process)//GO:0006629(lipid metabolic process)//GO:0001525(angiogenesis)
Mcoln1	ENSMUSG00000004567	protein_coding	+	chr8:3500456-3515303	6.85314	6.3351	1.08177	0.1134	0.70005	0.999241	up	6.41723	8.06707	6.07514	5.4873	6.72246	6.79553	94178	2210015I05Rik|TRPML1|mucolipidin	MGI:MGI:1890498|Ensembl:ENSMUSG00000004567|Vega:OTTMUSG00000026357	8	8 A1.1|8 1.92 cM	mucolipin 1	mmu04142(Lysosome)	GO:0005768(endosome)//GO:0005764(lysosome)//GO:0005886(plasma membrane)//GO:0043235(receptor complex)//GO:0016020(membrane)//GO:0005770(late endosome)//GO:0005765(lysosomal membrane)//GO:0016021(integral component of membrane)//GO:0005737(cytoplasm)	GO:0072345(NAADP-sensitive calcium-release channel activity)//GO:0005261(cation channel activity)	GO:0051209(release of sequestered calcium ion into cytosol)//GO:0097352(autophagosome maturation)//GO:0006816(calcium ion transport)//GO:0006810(transport)//GO:0016197(endosomal transport)//GO:0006811(ion transport)
Pkn2	ENSMUSG00000004591	protein_coding	-	chr3:142790708-142882004	11.5109	9.48016	1.21421	0.280013	0.18005	0.999241	up	12.5593	10.9722	11.0011	7.5417	10.6542	10.2446	109333	6030436C20Rik|AI507382|PRK2|Prkcl2|Stk7	MGI:MGI:109211|Ensembl:ENSMUSG00000004591|Vega:OTTMUSG00000036912	3	3 H1|3 66.69 cM	protein kinase N2	mmu04151(PI3K-Akt signaling pathway)//mmu05132(Salmonella infection)	GO:0005886(plasma membrane)//GO:0048471(perinuclear region of cytoplasm)//GO:0043296(apical junction complex)//GO:0030027(lamellipodium)//GO:0016020(membrane)//GO:0043234(protein complex)//GO:0042995(cell projection)//GO:0045111(intermediate filament cytoskeleton)//GO:0005813(centrosome)//GO:0030496(midbody)//GO:0030054(cell junction)//GO:0005654(nucleoplasm)//GO:0005634(nucleus)//GO:0032154(clea…	GO:0070063(RNA polymerase binding)//GO:0042826(histone deacetylase binding)//GO:0004674(protein serine/threonine kinase activity)//GO:0004672(protein kinase activity)//GO:0000166(nucleotide binding)//GO:0016301(kinase activity)//GO:0044822(poly(A) RNA binding)//GO:0004697(protein kinase C activity)//GO:0005515(protein binding)//GO:0005524(ATP binding)//GO:0016740(transferase activity)	GO:2000145(regulation of cell motility)//GO:0010631(epithelial cell migration)//GO:0016310(phosphorylation)//GO:0006468(protein phosphorylation)//GO:0051301(cell division)//GO:0006351(transcription, DNA-templated)//GO:0007155(cell adhesion)//GO:0007049(cell cycle)//GO:0032467(positive regulation of cytokinesis)//GO:0045931(positive regulation of mitotic cell cycle)//GO:0043297(apical junction ass…
Cd33	ENSMUSG00000004609	protein_coding	-	chr7:43527455-43533171	0.0448156	0.0323745	1.38429	0.469144	1	1	up	0	0.103097	0.0313497	0.0661979	0.0309256	0	12489	Siglec-3|gp67	MGI:MGI:99440|Ensembl:ENSMUSG00000004609|Vega:OTTMUSG00000058533	7	7 B4|7 28.25 cM	CD33 antigen	mmu04640(Hematopoietic cell lineage)	GO:0016020(membrane)//GO:0005886(plasma membrane)//GO:0009897(external side of plasma membrane)//GO:0016021(integral component of membrane)	GO:0030246(carbohydrate binding)	GO:0007155(cell adhesion)
Nkg7	ENSMUSG00000004612	protein_coding	+	chr7:43437072-43438246	0	0	1	0	1	1	up	0	0	0	0	0	0	72310	2500004F03Rik	MGI:MGI:1931250|Ensembl:ENSMUSG00000004612|Vega:OTTMUSG00000058528	7	7|7 B2	natural killer cell group 7 sequence		GO:0005575(cellular_component)	GO:0003674(molecular_function)	GO:0008150(biological_process)
Lim2	ENSMUSG00000004613	protein_coding	+	chr7:43427621-43435991	0	0	1	0	1	1	up	0	0	0	0	0	0	233187	19kDa|4833403J20|MP19|To3	MGI:MGI:104698|Ensembl:ENSMUSG00000004613|Vega:OTTMUSG00000039806	7	7 B4|7 28.25 cM	lens intrinsic membrane protein 2		GO:0005923(bicellular tight junction)//GO:0016020(membrane)//GO:0005886(plasma membrane)//GO:0016021(integral component of membrane)//GO:0031982(vesicle)	GO:0005212(structural constituent of eye lens)	GO:0043010(camera-type eye development)//GO:0002088(lens development in camera-type eye)
Stxbp2	ENSMUSG00000004626	protein_coding	+	chr8:3630954-3643644	1.5039	0.783117	1.9204	0.941406	0.0439	0.932839	up	1.95176	1.14272	1.41721	1.16035	0.313003	0.875998	20911	C79054|Munc-18-2|Munc-18b|Munc18b|Sxtbp2|Sxtp2|Unc18-2|Unc18b|muSec1	MGI:MGI:107370|Ensembl:ENSMUSG00000004626|Vega:OTTMUSG00000027109	8	8 1.92 cM|8 A1	syntaxin binding protein 2		GO:0042582(azurophil granule)//GO:0005886(plasma membrane)//GO:0070062(extracellular exosome)//GO:0030027(lamellipodium)//GO:0070820(tertiary granule)//GO:0043234(protein complex)//GO:0031201(SNARE complex)//GO:0005829(cytosol)//GO:0042581(specific granule)//GO:0005737(cytoplasm)//GO:0044194(cytolytic granule)//GO:0042589(zymogen granule membrane)//GO:0016324(apical plasma membrane)//GO:0030141(s…	GO:0017075(syntaxin-1 binding)//GO:0030348(syntaxin-3 binding)//GO:0005515(protein binding)//GO:0019905(syntaxin binding)	GO:0006887(exocytosis)//GO:0043304(regulation of mast cell degranulation)//GO:0016192(vesicle-mediated transport)//GO:0006904(vesicle docking involved in exocytosis)//GO:0006810(transport)//GO:0015031(protein transport)//GO:0001909(leukocyte mediated cytotoxicity)
Pcp2	ENSMUSG00000004630	protein_coding	-	chr8:3621550-3625545	0	0	1	0	1	1	up	0	0	0	0	0	0	18545	L7|Pcp-2	MGI:MGI:97508|Ensembl:ENSMUSG00000004630|Vega:OTTMUSG00000032848	8	8 A1.1|8 1.92 cM	Purkinje cell protein 2 (L7)		GO:0043025(neuronal cell body)	GO:0030695(GTPase regulator activity)//GO:0005085(guanyl-nucleotide exchange factor activity)	GO:0016056(rhodopsin mediated signaling pathway)
Slbp	ENSMUSG00000004642	protein_coding	-	chr5:33634951-33652574	5.08483	3.83587	1.3256	0.406646	0.29525	0.999241	up	6.65985	4.51985	4.07479	4.01963	2.58148	4.9065	20492	-	MGI:MGI:108402|Ensembl:ENSMUSG00000004642|Vega:OTTMUSG00000025101	5	5|5 B2	stem-loop binding protein		GO:0030529(intracellular ribonucleoprotein complex)//GO:0005634(nucleus)//GO:0071204(histone pre-mRNA 3'end processing complex)//GO:0005737(cytoplasm)	GO:0044822(poly(A) RNA binding)//GO:0003723(RNA binding)//GO:0071207(histone pre-mRNA stem-loop binding)//GO:0003729(mRNA binding)	GO:0006397(mRNA processing)//GO:0006398(mRNA 3'-end processing by stem-loop binding and cleavage)//GO:0051028(mRNA transport)//GO:0033260(nuclear DNA replication)
Tyr	ENSMUSG00000004651	protein_coding	-	chr7:87425269-87493411	0	0	1	0	1	1	up	0	0	0	0	0	0	22173	Oca1|albino|c|skc35	MGI:MGI:98880|Ensembl:ENSMUSG00000004651|Vega:OTTMUSG00000059417	7	7 D3-E1|7 49.01 cM	tyrosinase	mmu00350(Tyrosine metabolism)//mmu00740(Riboflavin metabolism)//mmu01100(Metabolic pathways)//mmu04916(Melanogenesis)	GO:0016021(integral component of membrane)//GO:0016020(membrane)//GO:0048471(perinuclear region of cytoplasm)//GO:0005829(cytosol)//GO:0042470(melanosome)//GO:0005634(nucleus)//GO:0005737(cytoplasm)	GO:0046982(protein heterodimerization activity)//GO:0042803(protein homodimerization activity)//GO:0005507(copper ion binding)//GO:0016491(oxidoreductase activity)//GO:0004497(monooxygenase activity)//GO:0004503(monophenol monooxygenase activity)//GO:0046872(metal ion binding)//GO:0005515(protein binding)	GO:0055114(oxidation-reduction process)//GO:0008152(metabolic process)//GO:0008283(cell proliferation)//GO:0048538(thymus development)//GO:0042438(melanin biosynthetic process)//GO:0043473(pigmentation)
Ghrhr	ENSMUSG00000004654	protein_coding	+	chr6:55376294-55388530	0	0	1	0	1	1	up	0	0	0	0	0	0	14602	Ghrfr|lit|little	MGI:MGI:95710|Ensembl:ENSMUSG00000004654|Vega:OTTMUSG00000057887	6	6 B3|6 27.38 cM	growth hormone releasing hormone receptor	mmu04080(Neuroactive ligand-receptor interaction)	GO:0005886(plasma membrane)//GO:0005640(nuclear outer membrane)//GO:0009986(cell surface)//GO:0016020(membrane)//GO:0016021(integral component of membrane)//GO:0016363(nuclear matrix)//GO:0042383(sarcolemma)//GO:0005637(nuclear inner membrane)//GO:0005737(cytoplasm)//GO:0030141(secretory granule)	GO:0017046(peptide hormone binding)//GO:0004888(transmembrane signaling receptor activity)//GO:0004871(signal transducer activity)//GO:0019838(growth factor binding)//GO:0004930(G-protein coupled receptor activity)//GO:0016520(growth hormone-releasing hormone receptor activity)//GO:0005515(protein binding)	GO:0030104(water homeostasis)//GO:0007166(cell surface receptor signaling pathway)//GO:0032868(response to insulin)//GO:0046887(positive regulation of hormone secretion)//GO:0051384(response to glucocorticoid)//GO:0007595(lactation)//GO:0060124(positive regulation of growth hormone secretion)//GO:0060133(somatotropin secreting cell development)//GO:0030816(positive regulation of cAMP metabolic pr…
Abca13	ENSMUSG00000004668	protein_coding	+	chr11:9191941-9684259	0	0	1	0	1	1	up	0	0	0	0	0	0	268379	9830132L24|A930002G16Rik|AI956815	MGI:MGI:2388707|Ensembl:ENSMUSG00000004668|Vega:OTTMUSG00000005151	11	11|11 A2	ATP-binding cassette, sub-family A (ABC1), member 13	mmu02010(ABC transporters)	GO:0016020(membrane)//GO:0016021(integral component of membrane)//GO:0043231(intracellular membrane-bounded organelle)	GO:0005524(ATP binding)//GO:0000166(nucleotide binding)//GO:0042626(ATPase activity, coupled to transmembrane movement of substances)//GO:0005215(transporter activity)//GO:0016887(ATPase activity)	GO:0006810(transport)//GO:0033700(phospholipid efflux)//GO:0033344(cholesterol efflux)
Hdac9	ENSMUSG00000004698	protein_coding	-	chr12:34095876-34917095	0.73304	0.560796	1.30714	0.386416	0.2923	0.999241	up	0.709929	0.670339	0.818852	0.923203	0.494399	0.264786	79221	AV022454|D030072B18Rik|HD7B|HD9|HDRP|Hdac7b|Mitr|mKIAA0744	MGI:MGI:1931221|Ensembl:ENSMUSG00000004698	12	12|12 A3	histone deacetylase 9	mmu05034(Alcoholism)//mmu05203(Viral carcinogenesis)	GO:0000118(histone deacetylase complex)//GO:0005634(nucleus)//GO:0035097(histone methyltransferase complex)//GO:0005667(transcription factor complex)//GO:0005737(cytoplasm)	GO:0032041(NAD-dependent histone deacetylase activity (H3-K14 specific))//GO:0042826(histone deacetylase binding)//GO:0005080(protein kinase C binding)//GO:0033558(protein deacetylase activity)//GO:0070491(repressing transcription factor binding)//GO:0008134(transcription factor binding)//GO:0003714(transcription corepressor activity)//GO:0005515(protein binding)//GO:0004407(histone deacetylase a…	GO:0007507(heart development)//GO:0016575(histone deacetylation)//GO:0090050(positive regulation of cell migration involved in sprouting angiogenesis)//GO:0016568(chromatin modification)//GO:0034983(peptidyl-lysine deacetylation)//GO:0006351(transcription, DNA-templated)//GO:0048742(regulation of skeletal muscle fiber development)//GO:0070933(histone H4 deacetylation)//GO:0006954(inflammatory res…
Cd244	ENSMUSG00000004709	protein_coding	+	chr1:171559192-171585318	0.0136128	1.05315e-06	12926.1	13.658	1	1	up	0	1.44899e-06	0.0408371	0	1.37803e-06	1.78141e-06	18106	2B4|C9.1|F730046O15Rik|Ly90|NAIL|NKR2B4|Nmrk|SLAMF4	MGI:MGI:109294|Ensembl:ENSMUSG00000004709|Vega:OTTMUSG00000016914	1	1 H3|1 79.52 cM	CD244 natural killer cell receptor 2B4	mmu04650(Natural killer cell mediated cytotoxicity)	GO:0016020(membrane)//GO:0005886(plasma membrane)//GO:0009897(external side of plasma membrane)//GO:0016021(integral component of membrane)	GO:0004872(receptor activity)//GO:0005515(protein binding)//GO:0042288(MHC class I protein binding)	GO:1902715(positive regulation of interferon-gamma secretion)//GO:0060732(positive regulation of inositol phosphate biosynthetic process)//GO:0002376(immune system process)//GO:0045087(innate immune response)//GO:0071663(positive regulation of granzyme B production)//GO:0032819(positive regulation of natural killer cell proliferation)//GO:0001773(myeloid dendritic cell activation)//GO:0002323(nat…
Emr1	ENSMUSG00000004730	protein_coding	+	chr17:57358685-57483529	0.334036	0.332422	1.00485	0.00698604	1	1	up	0.412545	0.351786	0.237776	0.275919	0.398754	0.322593
Rab23	ENSMUSG00000004768	protein_coding	+	chr1:33719881-33742564	2.26393	1.33964	1.68996	0.756985	0.05585	0.963193	up	2.1067	3.16216	1.52293	1.5289	1.12775	1.36226	19335	AW545388|opb|opb2	MGI:MGI:99833|Ensembl:ENSMUSG00000004768|Vega:OTTMUSG00000021871	1	1 B|1 12.8 cM	RAB23, member RAS oncogene family	mmu04340(Hedgehog signaling pathway)	GO:0005768(endosome)//GO:0005886(plasma membrane)//GO:0070062(extracellular exosome)//GO:0045335(phagocytic vesicle)//GO:0010008(endosome membrane)//GO:0016020(membrane)//GO:0031410(cytoplasmic vesicle)//GO:0005776(autophagosome)//GO:0005737(cytoplasm)	GO:0000166(nucleotide binding)//GO:0005525(GTP binding)//GO:0003924(GTPase activity)	GO:0042384(cilium assembly)//GO:0021513(spinal cord dorsal/ventral patterning)//GO:0097094(craniofacial suture morphogenesis)//GO:0008589(regulation of smoothened signaling pathway)//GO:0007264(small GTPase mediated signal transduction)//GO:0045861(negative regulation of proteolysis)//GO:0021904(dorsal/ventral neural tube patterning)//GO:0042733(embryonic digit morphogenesis)//GO:0007275(multicel…
Dlst	ENSMUSG00000004789	protein_coding	+	chr12:85110832-85134845	66.0402	61.7971	1.06866	0.0958057	0.63815	0.999241	up	70.7852	63.228	64.1075	68.9853	63.941	52.465	78920	1600017E01Rik|4632413C10Rik|4930529O08Rik|DLTS	MGI:MGI:1926170|Ensembl:ENSMUSG00000004789	12	12|12 D3	dihydrolipoamide S-succinyltransferase (E2 component of 2-oxo-glutarate complex)	mmu00020(Citrate cycle (TCA cycle))//mmu00310(Lysine degradation)//mmu01100(Metabolic pathways)//mmu01200(Carbon metabolism)	GO:0005886(plasma membrane)//GO:0043209(myelin sheath)//GO:0016020(membrane)//GO:0045252(oxoglutarate dehydrogenase complex)//GO:0043231(intracellular membrane-bounded organelle)//GO:0005739(mitochondrion)//GO:0070062(extracellular exosome)//GO:0005634(nucleus)	GO:0004149(dihydrolipoyllysine-residue succinyltransferase activity)//GO:0051087(chaperone binding)//GO:0031072(heat shock protein binding)//GO:0016746(transferase activity, transferring acyl groups)//GO:0016740(transferase activity)	GO:0008152(metabolic process)//GO:0006103(2-oxoglutarate metabolic process)//GO:0006734(NADH metabolic process)//GO:0006099(tricarboxylic acid cycle)
Ulk2	ENSMUSG00000004798	protein_coding	-	chr11:61775648-61855073	23.0373	18.342	1.25599	0.328821	0.0789	0.999241	up	24.6761	21.4221	23.0137	14.2734	19.5976	21.1549	29869	A830085I22Rik|AU015340|Unc51.2|mKIAA0623	MGI:MGI:1352758|Ensembl:ENSMUSG00000004798|Vega:OTTMUSG00000005846	11	11|11 B2	unc-51 like kinase 2	mmu04140(Regulation of autophagy)//mmu04150(mTOR signaling pathway)//mmu04211(Longevity regulating pathway - mammal)	GO:0016020(membrane)//GO:0034045(pre-autophagosomal structure membrane)//GO:0031410(cytoplasmic vesicle)	GO:0004674(protein serine/threonine kinase activity)//GO:0004672(protein kinase activity)//GO:0000166(nucleotide binding)//GO:0016301(kinase activity)//GO:0005515(protein binding)//GO:0005524(ATP binding)//GO:0016740(transferase activity)	GO:0007409(axonogenesis)//GO:0042594(response to starvation)//GO:0048675(axon extension)//GO:0016310(phosphorylation)//GO:0006468(protein phosphorylation)//GO:0048671(negative regulation of collateral sprouting)//GO:0046777(protein autophosphorylation)//GO:0010506(regulation of autophagy)//GO:0006914(autophagy)//GO:0007399(nervous system development)//GO:0007165(signal transduction)
Tmed11	ENSMUSG00000004821	protein_coding	-	chr5:108777234-108795363	0	0	1	0	1	1	up	0	0	0	0	0	0	67366	1810008K16Rik	MGI:MGI:1914616|Ensembl:ENSMUSG00000004821|Vega:OTTMUSG00000026764	5	5|5 F	transmembrane emp24 protein transport domain containing		GO:0005783(endoplasmic reticulum)//GO:0016020(membrane)//GO:0016021(integral component of membrane)//GO:0005575(cellular_component)	GO:0003674(molecular_function)	GO:0006810(transport)//GO:0008150(biological_process)
Grap	ENSMUSG00000004837	protein_coding	+	chr11:61653264-61720826	1.53099	1.18323	1.2939	0.37173	0.38055	0.999241	up	1.45552	1.50243	1.63501	1.01687	0.996158	1.53666	71520	8430435N19Rik|BB233594	MGI:MGI:1918770|Ensembl:ENSMUSG00000004837|Vega:OTTMUSG00000005843	11	11|11 B2	GRB2-related adaptor protein		GO:0005575(cellular_component)	GO:0003674(molecular_function)	GO:0008150(biological_process)
Pou1f1	ENSMUSG00000004842	protein_coding	+	chr16:65520511-65535005	0	0	1	0	1	1	up	0	0	0	0	0	0	18736	GHF-1|Hmp1|Pit-1|Pit1|Pit1-rs1|dw|dwarf	MGI:MGI:97588|Ensembl:ENSMUSG00000004842|Vega:OTTMUSG00000039845	16	16 C1.3|16 37.25 cM	POU domain, class 1, transcription factor 1		GO:0005654(nucleoplasm)//GO:0005667(transcription factor complex)//GO:0005634(nucleus)//GO:0005737(cytoplasm)	GO:0003682(chromatin binding)//GO:0001102(RNA polymerase II activating transcription factor binding)//GO:0001105(RNA polymerase II transcription coactivator activity)//GO:0003700(transcription factor activity, sequence-specific DNA binding)//GO:0000981(RNA polymerase II transcription factor activity, sequence-specific DNA binding)//GO:0000978(RNA polymerase II core promoter proximal region sequen…	GO:0008284(positive regulation of cell proliferation)//GO:0008340(determination of adult lifespan)//GO:0060126(somatotropin secreting cell differentiation)//GO:0043567(regulation of insulin-like growth factor receptor signaling pathway)//GO:0045944(positive regulation of transcription from RNA polymerase II promoter)//GO:0006351(transcription, DNA-templated)//GO:0001708(cell fate specification)//…
Chmp2b	ENSMUSG00000004843	protein_coding	-	chr16:65539132-65562697	23.1602	22.9506	1.00913	0.0131191	0.94545	0.999241	up	23.8999	25.027	20.5537	27.3799	19.9769	21.4949	68942	1190006E07Rik	MGI:MGI:1916192|Ensembl:ENSMUSG00000004843	16	16|16 C1.3	charged multivesicular body protein 2B	mmu04144(Endocytosis)	GO:0005768(endosome)//GO:0005764(lysosome)//GO:0070062(extracellular exosome)//GO:0005886(plasma membrane)//GO:0016020(membrane)//GO:0005770(late endosome)//GO:0005829(cytosol)//GO:0005739(mitochondrion)//GO:0000815(ESCRT III complex)//GO:0005622(intracellular)//GO:0005634(nucleus)//GO:0005737(cytoplasm)	GO:0019904(protein domain specific binding)	GO:0007080(mitotic metaphase plate congression)//GO:1902188(positive regulation of viral release from host cell)//GO:0070050(neuron cellular homeostasis)//GO:0007032(endosome organization)//GO:0039702(viral budding via host ESCRT complex)//GO:0010824(regulation of centrosome duplication)//GO:0000920(cell separation after cytokinesis)//GO:0050890(cognition)//GO:1901673(regulation of mitotic spindl…
Srpk1	ENSMUSG00000004865	protein_coding	-	chr17:28587647-28622521	5.30644	4.74143	1.11916	0.162422	0.603	0.999241	up	5.93445	4.62032	5.36455	3.42723	5.48737	5.30969	20815	AU017960	MGI:MGI:106908|Ensembl:ENSMUSG00000004865|Vega:OTTMUSG00000024247	17	17|17 A3.3	serine/arginine-rich protein specific kinase 1	mmu05168(Herpes simplex infection)	GO:0005783(endoplasmic reticulum)//GO:0005886(plasma membrane)//GO:0005634(nucleus)//GO:0043231(intracellular membrane-bounded organelle)//GO:0005737(cytoplasm)	GO:0004674(protein serine/threonine kinase activity)//GO:0004672(protein kinase activity)//GO:0000287(magnesium ion binding)//GO:0000166(nucleotide binding)//GO:0016301(kinase activity)//GO:0044822(poly(A) RNA binding)//GO:0005515(protein binding)//GO:0005524(ATP binding)//GO:0016740(transferase activity)	GO:0050684(regulation of mRNA processing)//GO:0045071(negative regulation of viral genome replication)//GO:0008380(RNA splicing)//GO:0016310(phosphorylation)//GO:0006468(protein phosphorylation)//GO:0030154(cell differentiation)//GO:0006397(mRNA processing)//GO:0045070(positive regulation of viral genome replication)//GO:0035556(intracellular signal transduction)//GO:0007059(chromosome segregatio…
Pax3	ENSMUSG00000004872	protein_coding	-	chr1:78101266-78197134	0.144114	0.112978	1.2756	0.351171	1	1	up	0.184225	0.0979222	0.150195	0.0794981	0.235097	0.0243382	18505	Pax-3|Sp|Splchl2|splotch	MGI:MGI:97487|Ensembl:ENSMUSG00000004872|Vega:OTTMUSG00000037633	1	1 C4|1 39.79 cM	paired box 3	mmu05202(Transcriptional misregulation in cancer)	GO:0005654(nucleoplasm)//GO:0005667(transcription factor complex)//GO:0005634(nucleus)	GO:0003700(transcription factor activity, sequence-specific DNA binding)//GO:0043565(sequence-specific DNA binding)//GO:0003682(chromatin binding)//GO:0003705(transcription factor activity, RNA polymerase II distal enhancer sequence-specific binding)//GO:0071837(HMG box domain binding)//GO:0005515(protein binding)//GO:0003677(DNA binding)	GO:0007517(muscle organ development)//GO:0055007(cardiac muscle cell differentiation)//GO:0060594(mammary gland specification)//GO:0021915(neural tube development)//GO:0016477(cell migration)//GO:0000122(negative regulation of transcription from RNA polymerase II promoter)//GO:0001843(neural tube closure)//GO:0045893(positive regulation of transcription, DNA-templated)//GO:0021527(spinal cord ass…
Lbr	ENSMUSG00000004880	protein_coding	-	chr1:181813457-181842401	4.89937	4.8088	1.01883	0.0269194	0.8978	0.999241	up	5.10127	5.09138	4.50546	3.67816	5.98306	4.76517	98386	AI505894|ic	MGI:MGI:2138281|Ensembl:ENSMUSG00000004880|Vega:OTTMUSG00000050712	1	1 H5|1 84.89 cM	lamin B receptor		GO:0016021(integral component of membrane)//GO:0005634(nucleus)//GO:0005635(nuclear envelope)//GO:0031965(nuclear membrane)//GO:0016020(membrane)//GO:0005639(integral component of nuclear inner membrane)//GO:0005643(nuclear pore)//GO:0005637(nuclear inner membrane)//GO:0005652(nuclear lamina)//GO:0005737(cytoplasm)	GO:0016628(oxidoreductase activity, acting on the CH-CH group of donors, NAD or NADP as acceptor)//GO:0070087(chromo shadow domain binding)//GO:0016627(oxidoreductase activity, acting on the CH-CH group of donors)//GO:0051087(chaperone binding)//GO:0044822(poly(A) RNA binding)//GO:0008139(nuclear localization sequence binding)//GO:0003677(DNA binding)	GO:0055114(oxidation-reduction process)//GO:0016126(sterol biosynthetic process)
Crabp2	ENSMUSG00000004885	protein_coding	+	chr3:87919505-88136989	0.072875	0.0322357	2.2607	1.17677	1	1	up	0.127525	0	0.0911001	0.096707	0	0	12904	AI893628|Crabp-2|CrabpII	MGI:MGI:88491|Ensembl:ENSMUSG00000004885|Vega:OTTMUSG00000027199	3	3F1|3	cellular retinoic acid binding protein II		GO:0005783(endoplasmic reticulum)//GO:0005654(nucleoplasm)//GO:0005634(nucleus)//GO:0005737(cytoplasm)//GO:0070062(extracellular exosome)	GO:0001972(retinoic acid binding)//GO:0016918(retinal binding)//GO:0005215(transporter activity)//GO:0008289(lipid binding)//GO:0030332(cyclin binding)//GO:0019841(retinol binding)	GO:0042573(retinoic acid metabolic process)//GO:0048672(positive regulation of collateral sprouting)//GO:0006810(transport)//GO:0035115(embryonic forelimb morphogenesis)//GO:0048385(regulation of retinoic acid receptor signaling pathway)
Nes	ENSMUSG00000004891	protein_coding	+	chr3:87919505-88136989	5.13911	4.50242	1.14141	0.19082	0.6047	0.999241	up	6.08267	5.89199	3.44268	4.9721	4.14141	4.39374	18008	AA166324|C78523|ESTM46	MGI:MGI:101784|Ensembl:ENSMUSG00000004891|Vega:OTTMUSG00000026661	3	3 F1|3 38.78 cM	nestin		GO:0005882(intermediate filament)//GO:0005737(cytoplasm)	GO:0031730(CCR5 chemokine receptor binding)//GO:0005198(structural molecule activity)//GO:0005515(protein binding)//GO:0019215(intermediate filament binding)	GO:0007399(nervous system development)//GO:0048858(cell projection morphogenesis)//GO:0007275(multicellular organism development)//GO:0043524(negative regulation of neuron apoptotic process)
Bcan	ENSMUSG00000004892	protein_coding	-	chr3:87919505-88136989	0	0	1	0	1	1	up	0	0	0	0	0	0	12032	Cspg7	MGI:MGI:1096385|Ensembl:ENSMUSG00000004892|Vega:OTTMUSG00000051892	3	3 F1|3 38.78 cM	brevican		GO:0005576(extracellular region)//GO:0030425(dendrite)//GO:0031225(anchored component of membrane)//GO:0045202(synapse)//GO:0005578(proteinaceous extracellular matrix)//GO:0005615(extracellular space)	GO:0005201(extracellular matrix structural constituent)//GO:0030246(carbohydrate binding)//GO:0005540(hyaluronic acid binding)//GO:0005509(calcium ion binding)	GO:0021766(hippocampus development)//GO:0001501(skeletal system development)//GO:0007155(cell adhesion)
Hdgf	ENSMUSG00000004897	protein_coding	+	chr3:87906320-87916132	130.693	117.625	1.1111	0.151989	0.47665	0.999241	up	123.973	134.614	133.491	102.257	118.797	131.82	15191	AI118077|D3Ertd299e	MGI:MGI:1194494|Ensembl:ENSMUSG00000004897|Vega:OTTMUSG00000027208	3	3 F1|3 38.78 cM	hepatoma-derived growth factor		GO:0005654(nucleoplasm)//GO:0005634(nucleus)//GO:0017053(transcriptional repressor complex)//GO:0005615(extracellular space)//GO:0005737(cytoplasm)	GO:0001106(RNA polymerase II transcription corepressor activity)//GO:0008201(heparin binding)//GO:0000978(RNA polymerase II core promoter proximal region sequence-specific DNA binding)//GO:0001078(transcriptional repressor activity, RNA polymerase II core promoter proximal region sequence-specific binding)//GO:0000166(nucleotide binding)//GO:0008083(growth factor activity)//GO:0044822(poly(A) RNA…	GO:0009987(cellular process)//GO:0006351(transcription, DNA-templated)//GO:0045944(positive regulation of transcription from RNA polymerase II promoter)//GO:0000122(negative regulation of transcription from RNA polymerase II promoter)//GO:0034504(protein localization to nucleus)//GO:0006355(regulation of transcription, DNA-templated)
Slc25a18	ENSMUSG00000004902	protein_coding	+	chr6:120773767-120793982	0	0	1	0	1	1	up	0	0	0	0	0	0	71803	1500015I14Rik|AW125787	MGI:MGI:1919053|Ensembl:ENSMUSG00000004902|Vega:OTTMUSG00000056827	6	6 F1|6 57.0 cM	solute carrier family 25 (mitochondrial carrier), member 18		GO:0016020(membrane)//GO:0005743(mitochondrial inner membrane)//GO:0005739(mitochondrion)//GO:0016021(integral component of membrane)	GO:0003735(structural constituent of ribosome)//GO:0015293(symporter activity)	GO:0006412(translation)//GO:0055085(transmembrane transport)//GO:0006810(transport)
Thop1	ENSMUSG00000004929	protein_coding	+	chr10:81070034-81082559	7.32705	6.28097	1.16655	0.222245	0.5401	0.999241	up	8.79199	6.26616	6.92299	5.96784	6.08334	6.79173	50492	AI131655|AI327041|EP24.15	MGI:MGI:1354165|Ensembl:ENSMUSG00000004929|Vega:OTTMUSG00000035441	10	10 C1|10 39.72 cM	thimet oligopeptidase 1	mmu04614(Renin-angiotensin system)//mmu05143(African trypanosomiasis)	GO:0005758(mitochondrial intermembrane space)//GO:0005737(cytoplasm)	GO:0008237(metallopeptidase activity)//GO:0008233(peptidase activity)//GO:0004222(metalloendopeptidase activity)//GO:0046872(metal ion binding)//GO:0042277(peptide binding)//GO:0016787(hydrolase activity)	GO:0006508(proteolysis)//GO:0006518(peptide metabolic process)//GO:0035556(intracellular signal transduction)
Map2k1	ENSMUSG00000004936	protein_coding	-	chr9:64185769-64253631	16.2422	14.5419	1.11692	0.159532	0.4018	0.999241	up	15.3992	18.632	14.6956	12.4897	14.6117	16.5244	26395	MAPKK1|MEKK1|Mek1|Prkmk1	MGI:MGI:1346866|Ensembl:ENSMUSG00000004936|Vega:OTTMUSG00000016895	9	9 C|9 34.55 cM	mitogen-activated protein kinase kinase 1	mmu04010(MAPK signaling pathway)//mmu04012(ErbB signaling pathway)//mmu04014(Ras signaling pathway)//mmu04015(Rap1 signaling pathway)//mmu04022(cGMP-PKG signaling pathway)//mmu04024(cAMP signaling pathway)//mmu04062(Chemokine signaling pathway)//mmu04066(HIF-1 signaling pathway)//mmu04068(FoxO signaling pathway)//mmu04071(Sphingolipid signaling pathway)//mmu04072(Phospholipase D signaling pathway…	GO:0005886(plasma membrane)//GO:0005634(nucleus)//GO:0005874(microtubule)//GO:0005938(cell cortex)//GO:0030424(axon)//GO:0016020(membrane)//GO:0030425(dendrite)//GO:0048471(perinuclear region of cytoplasm)//GO:0005794(Golgi apparatus)//GO:0005770(late endosome)//GO:0005829(cytosol)//GO:0005739(mitochondrion)//GO:0043204(perikaryon)//GO:0005925(focal adhesion)//GO:0070062(extracellular exosome)//G…	GO:0047485(protein N-terminus binding)//GO:0004674(protein serine/threonine kinase activity)//GO:0019901(protein kinase binding)//GO:0004702(receptor signaling protein serine/threonine kinase activity)//GO:0004672(protein kinase activity)//GO:0017016(Ras GTPase binding)//GO:0004728(receptor signaling protein tyrosine phosphatase activity)//GO:0004712(protein serine/threonine/tyrosine kinase activ…	GO:0060674(placenta blood vessel development)//GO:0048313(Golgi inheritance)//GO:0060020(Bergmann glial cell differentiation)//GO:0006979(response to oxidative stress)//GO:0016310(phosphorylation)//GO:0010628(positive regulation of gene expression)//GO:0047496(vesicle transport along microtubule)//GO:0090398(cellular senescence)//GO:0090170(regulation of Golgi inheritance)//GO:0008285(negative re…
Nmrk2	ENSMUSG00000004939	protein_coding	-	chr10:81194608-81230833	34.3816	31.6697	1.08563	0.118534	0.6912	0.999241	up	41.7761	28.3311	33.0375	45.3522	31.6537	18.0031	69564	2310015C21Rik|Itgb1bp3|Mibp	MGI:MGI:1916814|Ensembl:ENSMUSG00000004939	10	10|10 C1	nicotinamide riboside kinase 2	mmu00760(Nicotinate and nicotinamide metabolism)//mmu01100(Metabolic pathways)	GO:0005622(intracellular)	GO:0005524(ATP binding)//GO:0000166(nucleotide binding)//GO:0016301(kinase activity)//GO:0046872(metal ion binding)//GO:0005515(protein binding)//GO:0016740(transferase activity)//GO:0050262(ribosylnicotinamide kinase activity)	GO:0016310(phosphorylation)//GO:0019363(pyridine nucleotide biosynthetic process)//GO:0045662(negative regulation of myoblast differentiation)
Zp3	ENSMUSG00000004948	protein_coding	+	chr5:135980098-135988624	0	0	1	0	1	1	up	0	0	0	0	0	0	22788	Zp-3	MGI:MGI:99215|Ensembl:ENSMUSG00000004948|Vega:OTTMUSG00000025389	5	5 G2|5 75.62 cM	zona pellucida glycoprotein 3		GO:0005886(plasma membrane)//GO:0005576(extracellular region)//GO:0016020(membrane)//GO:0048471(perinuclear region of cytoplasm)//GO:0005794(Golgi apparatus)//GO:0016021(integral component of membrane)//GO:0005615(extracellular space)//GO:0005783(endoplasmic reticulum)//GO:0005578(proteinaceous extracellular matrix)//GO:0031012(extracellular matrix)//GO:0005771(multivesicular body)//GO:0002081(ou…	GO:0032190(acrosin binding)//GO:0004871(signal transducer activity)//GO:0005384(manganese ion transmembrane transporter activity)//GO:0030246(carbohydrate binding)//GO:0015279(store-operated calcium channel activity)//GO:0005515(protein binding)	GO:2000388(positive regulation of antral ovarian follicle growth)//GO:0048599(oocyte development)//GO:0002455(humoral immune response mediated by circulating immunoglobulin)//GO:2000344(positive regulation of acrosome reaction)//GO:0090280(positive regulation of calcium ion import)//GO:0006886(intracellular protein transport)//GO:0002922(positive regulation of humoral immune response)//GO:0045893…
Rasa4	ENSMUSG00000004952	protein_coding	+	chr5:136083915-136111860	6.02021	4.8013	1.25387	0.326388	0.26025	0.999241	up	4.52787	6.95828	6.57448	4.63126	4.43465	5.338	54153	AA793972|AW112107|BB079060|CAPRI|GAPL	MGI:MGI:1858600|Ensembl:ENSMUSG00000004952|Vega:OTTMUSG00000025403	5	5|5 G2	RAS p21 protein activator 4	mmu04014(Ras signaling pathway)	GO:0016020(membrane)//GO:0005886(plasma membrane)//GO:0031235(intrinsic component of the cytoplasmic side of the plasma membrane)//GO:0005737(cytoplasm)//GO:0005829(cytosol)	GO:0005096(GTPase activator activity)//GO:0046872(metal ion binding)	GO:0046580(negative regulation of Ras protein signal transduction)//GO:0034260(negative regulation of GTPase activity)//GO:0035556(intracellular signal transduction)//GO:0007165(signal transduction)//GO:0043087(regulation of GTPase activity)//GO:0071277(cellular response to calcium ion)
Syt5	ENSMUSG00000004961	protein_coding	-	chr7:4539767-4546567	0	0	1	0	1	1	up	0	0	0	0	0	0	53420	SytV	MGI:MGI:1926368|Ensembl:ENSMUSG00000004961|Vega:OTTMUSG00000058457	7	7|7 A1	synaptotagmin V		GO:0005768(endosome)//GO:0005886(plasma membrane)//GO:0098793(presynapse)//GO:0043005(neuron projection)//GO:0016020(membrane)//GO:0048471(perinuclear region of cytoplasm)//GO:0016021(integral component of membrane)//GO:0045202(synapse)//GO:0030054(cell junction)//GO:0031410(cytoplasmic vesicle)//GO:0005623(cell)//GO:0030672(synaptic vesicle membrane)//GO:0031045(dense core granule)//GO:0043025(n…	GO:0046982(protein heterodimerization activity)//GO:0019905(syntaxin binding)//GO:0005544(calcium-dependent phospholipid binding)//GO:0046872(metal ion binding)//GO:0030276(clathrin binding)//GO:0005509(calcium ion binding)	GO:0048791(calcium ion-regulated exocytosis of neurotransmitter)//GO:0017158(regulation of calcium ion-dependent exocytosis)//GO:0006906(vesicle fusion)//GO:0048488(synaptic vesicle endocytosis)
Hnrnpa2b1	ENSMUSG00000004980	protein_coding	-	chr6:51460313-51469894	182.393	181.766	1.00345	0.00496526	0.9836	0.999241	up	171.066	185.14	190.973	177.588	211.977	155.735	53379	9130414A06Rik|Hnrpa2|Hnrpa2b1|hnrnp-A	MGI:MGI:104819|Ensembl:ENSMUSG00000004980|Vega:OTTMUSG00000057601	6	6|6 B3	heterogeneous nuclear ribonucleoprotein A2/B1		GO:0030529(intracellular ribonucleoprotein complex)//GO:0070062(extracellular exosome)//GO:0005576(extracellular region)//GO:0043204(perikaryon)//GO:0043005(neuron projection)//GO:0016020(membrane)//GO:0071598(neuronal ribonucleoprotein granule)//GO:0071013(catalytic step 2 spliceosome)//GO:0005681(spliceosomal complex)//GO:0000785(chromatin)//GO:0005654(nucleoplasm)//GO:0005634(nucleus)//GO:0005…	GO:0003676(nucleic acid binding)//GO:0097157(pre-mRNA intronic binding)//GO:0003723(RNA binding)//GO:0035198(miRNA binding)//GO:1990715(mRNA CDS binding)//GO:0000166(nucleotide binding)//GO:0001069(regulatory region RNA binding)//GO:0003730(mRNA 3'-UTR binding)//GO:0044822(poly(A) RNA binding)//GO:0043047(single-stranded telomeric DNA binding)//GO:1990247(N6-methyladenosine-containing RNA binding)	GO:0006406(mRNA export from nucleus)//GO:0008380(RNA splicing)//GO:0050658(RNA transport)//GO:0000398(mRNA splicing, via spliceosome)//GO:0051028(mRNA transport)//GO:1990428(miRNA transport)//GO:0016233(telomere capping)//GO:0048025(negative regulation of mRNA splicing, via spliceosome)//GO:0000122(negative regulation of transcription from RNA polymerase II promoter)//GO:0006397(mRNA processing)/…
Fxyd4	ENSMUSG00000004988	protein_coding	-	chr6:117933728-117937335	0	0	1	0	1	1	up	0	0	0	0	0	0	108017	0610008I02Rik|AI267073|Chif	MGI:MGI:1889005|Ensembl:ENSMUSG00000004988|Vega:OTTMUSG00000056757	6	6|6 F1	FXYD domain-containing ion transport regulator 4	mmu04960(Aldosterone-regulated sodium reabsorption)	GO:0016020(membrane)//GO:0016021(integral component of membrane)//GO:0005887(integral component of plasma membrane)	GO:0017080(sodium channel regulator activity)//GO:0051117(ATPase binding)//GO:0005267(potassium channel activity)//GO:0005216(ion channel activity)	GO:2000649(regulation of sodium ion transmembrane transporter activity)//GO:0006810(transport)//GO:0006811(ion transport)
Prkacb	ENSMUSG00000005034	protein_coding	-	chr3:146729578-146812960	13.4665	11.1444	1.20837	0.273058	0.1403	0.999241	up	14.3431	13.7302	12.3261	9.33816	11.0304	13.0644	18749	CbPKA|Pkacb	MGI:MGI:97594|Ensembl:ENSMUSG00000005034|Vega:OTTMUSG00000016475	3	3|3 H3	protein kinase, cAMP dependent, catalytic, beta	mmu04010(MAPK signaling pathway)//mmu04014(Ras signaling pathway)//mmu04020(Calcium signaling pathway)//mmu04024(cAMP signaling pathway)//mmu04062(Chemokine signaling pathway)//mmu04114(Oocyte meiosis)//mmu04210(Apoptosis)//mmu04211(Longevity regulating pathway - mammal)//mmu04213(Longevity regulating pathway - multiple species)//mmu04261(Adrenergic signaling in cardiomyocytes)//mmu04270(Vascular…	GO:0005886(plasma membrane)//GO:0070062(extracellular exosome)//GO:0016020(membrane)//GO:0048471(perinuclear region of cytoplasm)//GO:0005829(cytosol)//GO:0005952(cAMP-dependent protein kinase complex)//GO:0005813(centrosome)//GO:0097546(ciliary base)//GO:0005634(nucleus)//GO:0005737(cytoplasm)	GO:0004674(protein serine/threonine kinase activity)//GO:0031625(ubiquitin protein ligase binding)//GO:0004672(protein kinase activity)//GO:0000287(magnesium ion binding)//GO:0004691(cAMP-dependent protein kinase activity)//GO:0000166(nucleotide binding)//GO:0016301(kinase activity)//GO:0005524(ATP binding)//GO:0016740(transferase activity)	GO:1901621(negative regulation of smoothened signaling pathway involved in dorsal/ventral neural tube patterning)//GO:0051447(negative regulation of meiotic cell cycle)//GO:0016310(phosphorylation)//GO:0006468(protein phosphorylation)//GO:0070613(regulation of protein processing)//GO:0001843(neural tube closure)//GO:0007188(adenylate cyclase-modulating G-protein coupled receptor signaling pathway)
Sh2b2	ENSMUSG00000005057	protein_coding	-	chr5:136218148-136244903	0.39436	0.273746	1.44061	0.526677	1	1	up	0.696668	0.268571	0.21784	0.287344	0.349201	0.184692	23921	Aps	MGI:MGI:1345171|Ensembl:ENSMUSG00000005057|Vega:OTTMUSG00000054381	5	5|5 G1	SH2B adaptor protein 2	mmu04722(Neurotrophin signaling pathway)//mmu04910(Insulin signaling pathway)	GO:0005886(plasma membrane)//GO:0016020(membrane)//GO:0001725(stress fiber)//GO:0001726(ruffle)//GO:0005884(actin filament)//GO:0005737(cytoplasm)	GO:0008269(JAK pathway signal transduction adaptor activity)//GO:0035591(signaling adaptor activity)//GO:0004871(signal transducer activity)//GO:0005068(transmembrane receptor protein tyrosine kinase adaptor activity)//GO:0042802(identical protein binding)//GO:0005515(protein binding)//GO:0005070(SH3/SH2 adaptor activity)	GO:0001922(B-1 B cell homeostasis)//GO:0008286(insulin receptor signaling pathway)//GO:0042593(glucose homeostasis)//GO:0046325(negative regulation of glucose import)//GO:0050851(antigen receptor-mediated signaling pathway)//GO:0019222(regulation of metabolic process)//GO:0050873(brown fat cell differentiation)//GO:0019221(cytokine-mediated signaling pathway)//GO:0050776(regulation of immune resp…
Pex5	ENSMUSG00000005069	protein_coding	-	chr6:124396815-124415067	3.39134	3.27083	1.03684	0.0521966	0.8364	0.999241	up	3.86625	3.83339	2.47438	3.60754	3.38626	2.8187	19305	AW212715|ESTM1|PTS1R|Pxr1|X83306	MGI:MGI:1098808|Ensembl:ENSMUSG00000005069|Vega:OTTMUSG00000023142	6	6 F2|6 59.15 cM	peroxisomal biogenesis factor 5	mmu04146(Peroxisome)	GO:0005777(peroxisome)//GO:0016020(membrane)//GO:0043234(protein complex)//GO:0005829(cytosol)//GO:0005778(peroxisomal membrane)//GO:0005737(cytoplasm)	GO:0047485(protein N-terminus binding)//GO:0019899(enzyme binding)//GO:0031267(small GTPase binding)//GO:0000268(peroxisome targeting sequence binding)//GO:0005052(peroxisome matrix targeting signal-1 binding)	GO:0044255(cellular lipid metabolic process)//GO:0006635(fatty acid beta-oxidation)//GO:0021795(cerebral cortex cell migration)//GO:0007029(endoplasmic reticulum organization)//GO:0045046(protein import into peroxisome membrane)//GO:0015031(protein transport)//GO:0016560(protein import into peroxisome matrix, docking)//GO:0050905(neuromuscular process)//GO:0021895(cerebral cortex neuron different…
[truncated: 13,983 more rows]

## Sheet: NAFLD vs. CON1 Down-regulated
gene	gene_id	biotype	strand	locus	6.10-Q-M_FPKM	6.10-Q-C_FPKM	Fold change	log2(fold change)	p_value	FDR	Regulation	6.10-Q-M2_FPKM	6.10-Q-M3_FPKM	6.10-Q-M4_FPKM	6.10-Q-C4_FPKM	6.10-Q-C7_FPKM	6.10-Q-C8_FPKM	GeneID	Synonyms	dbXrefs	chromosome	map_location	description	pathway	GO-CC	GO-MF	GO-BP
[truncated: 8,157 more rows]

## Sheet: NASH vs. CON2 Up-regulated
gene	gene_id	biotype	strand	locus	10.14-Q-M_FPKM	10.14-Q-C_FPKM	Fold change	log2(fold change)	p_value	FDR	Regulation	10.14-Q-M2_FPKM	10.14-Q-M3_FPKM	10.14-Q-M4_FPKM	10.14-Q-C1_FPKM	10.14-Q-C3_FPKM	10.14-Q-C4_FPKM	GeneID	Synonyms	dbXrefs	chromosome	map_location	description	pathway	GO-CC	GO-MF	GO-BP
[truncated: 13,976 more rows]

## Sheet: NASH vs. CON2 Down-regulated
gene	gene_id	biotype	strand	locus	10.14-Q-M_FPKM	10.14-Q-C_FPKM	Fold change	log2(fold change)	p_value	FDR	Regulation	10.14-Q-M2_FPKM	10.14-Q-M3_FPKM	10.14-Q-M4_FPKM	10.14-Q-C1_FPKM	10.14-Q-C3_FPKM	10.14-Q-C4_FPKM	GeneID	Synonyms	dbXrefs	chromosome	map_location	description	pathway	GO-CC	GO-MF	GO-BP
[truncated: 8,589 more rows]
